# Supplementary material for: Aedes aegypti HPX8C modulates immune responses against viral infection
Source: PubMed Central journal article supplement (PMC6464178; doi:10.1371/journal.pntd.0007287), 2019-04-15
Supplement: pntd.0007287.s001.pdf [file pntd.0007287.s001.pdf]

**S1\_Table. DEGs in the midgut and carcass post DENV infection ( A union of DEGs in the midgut and carcass post DENV infection (p<0.05)).**

| gene id    | Name                                                    | CC 1d C  | CC 1d I  | CC 2d C  | CC 2d I  | CC 7d C  | CC 7d I  | MG 1d C  | MG 1d I  |
|------------|---------------------------------------------------------|----------|----------|----------|----------|----------|----------|----------|----------|
| AAEL004676 | (s)-2-hydroxy-acid oxidase                              | 3.87111  | 3.93576  | 8.63243  | 8.68273  | 17.6695  | 12.9273  | 90.2663  | 37.9054  |
| AAEL005035 | 1,4-dihydroxy-2-naphthoate octaprenyltransferase        | 18.7914  | 21.1232  | 15.5013  | 15.6223  | 17.2524  | 18.71    | 5.41493  | 12.0859  |
| AAEL006885 | 14-3-3zeta                                              | 278.775  | 284.117  | 250.087  | 228.156  | 309.989  | 312.396  | 789.028  | 468.35   |
| AAEL010399 | 1-acylglycerol-3-phosphate acyltransferase              | 33.9263  | 56.4738  | 33.7794  | 34.0979  | 53.1303  | 43.9873  | 47.7603  | 46.1609  |
| AAEL006321 | 1-acylglycerol-3-phosphate acyltransferase              | 17.2484  | 15.1407  | 22.8393  | 25.9546  | 27.0626  | 21.3652  | 64.1843  | 25.2902  |
| AAEL011898 | 1-acyl-sn-glycerol-3-phosphate acyltransferase          | 43.8957  | 43.3115  | 5.43332  | 9.14915  | 6.24364  | 4.89792  | 360.498  | 223.445  |
| AAEL003006 | 2-deoxyglucose-6-phosphate phosphatase                  | 8.83919  | 9.97297  | 30.7836  | 54.7097  | 16.9668  | 13.8827  | 21.6359  | 10.376   |
| AAEL005400 | 2-hydroxyacid dehydrogenase                             | 88.8045  | 89.7429  | 127.257  | 105.909  | 83.2964  | 83.7314  | 65.399   | 67.5078  |
| AAEL010235 | 30 kDa salivary gland allergen Aed a 3 Precursor        | 0.53186  | 0.119732 | 0.783058 | 0.391204 | 0.093936 | 0.102639 | 6.92205  | 0.576563 |
| AAEL008006 | 3-hydroxyacyl-coa dehydrogenase                         | 25.1243  | 26.4269  | 14.1222  | 44.3966  | 6.46595  | 6.9204   | 464.483  | 254.639  |
| AAEL006684 | 3-hydroxyisobutyrate dehydrogenase                      | 54.552   | 50.6424  | 48.7919  | 50.6766  | 44.788   | 43.6298  | 26.5486  | 37.3272  |
| AAEL008933 | 3-hydroxyisobutyrate dehydrogenase                      | 4.05392  | 3.89404  | 8.3974   | 1.78523  | 5.16731  | 3.89623  | 0.325692 | 1.8632   |
| AAEL011249 | 4-hydroxybenzoate octaprenyltransferase                 | 31.5002  | 30.1581  | 36.991   | 34.5111  | 22.9437  | 20.866   | 14.8699  | 24.2127  |
| AAEL003746 | 4-Hydroxybutyrate CoA-transferase, putative             | 86.9119  | 91.8326  | 107.704  | 112.057  | 65.0767  | 60.7179  | 113.783  | 109.9    |
| AAEL010442 | 4-hydroxyphenylpyruvate dioxygenase                     | 5.81904  | 17.1955  | 0.316541 | 0.514758 | 2.53491  | 1.88133  | 0.350959 | 4.05893  |
| AAEL007090 | 4-nitrophenylphosphatase                                | 0.42823  | 0.40282  | 0.466095 | 0.358659 | 0.389822 | 1.18498  | 373.481  | 139.71   |
| AAEL010099 | 4-nitrophenylphosphatase                                | 0.581809 | 0.552986 | 2.32991  | 3.03128  | 7.78041  | 4.36777  | 267.538  | 110.162  |
| AAEL007097 | 4-nitrophenylphosphatase                                | 2696.42  | 2215.16  | 6636.55  | 3622.54  | 935.35   | 1017.91  | 34.7894  | 1404.31  |
| AAEL007463 | 5,10-methylenetetrahydrofolate reductase, putative      | 15.5349  | 16.6192  | 7.06242  | 0        | 7.76637  | 7.56651  | 29.4458  | 21.665   |
| AAEL017904 | 5.8S_rRNA                                               | 0        | 0        | 0        | 0        | 0        | 0        | 0        | 216.978  |
| AAEL008925 | 5-formyltetrahydrofolate cyclo-ligase                   | 5.08628  | 5.33633  | 7.06456  | 4.96075  | 9.13437  | 8.90087  | 0.649227 | 4.10632  |
| AAEL010694 | 5-formyltetrahydrofolate cyclo-ligase                   | 17.0652  | 21.5295  | 25.0439  | 23.522   | 30.8614  | 32.4563  | 3.15215  | 14.8224  |
| AAEL004728 | 5-methyltetrahydrofolate:homocysteine methyltransferase | 136.42   | 149.922  | 28.0507  | 24.5822  | 5.62257  | 4.4617   | 27.9963  | 98.5917  |
| AAEL014715 | 67 kDa polymerase-associated factor PAF67, putative     | 23.5205  | 35.5419  | 19.31    | 15.0805  | 45.9167  | 45.4641  | 24.5248  | 33.7217  |

|            |                                                                        |          |         |          |          |          |          |          |         |
|------------|------------------------------------------------------------------------|----------|---------|----------|----------|----------|----------|----------|---------|
| AAEL005446 | 6-phosphofructo-2-kinase/fructose-2,6-bisphosphatase                   | 34.4717  | 32.5839 | 48.8198  | 59.2906  | 26.9905  | 27.0963  | 10.6291  | 20.8356 |
| AAEL013132 | 6-phosphofructo-2-kinase/fructose-2,6-bisphosphatase short form        | 56.7523  | 52.6302 | 62.8146  | 57.6047  | 51.5228  | 53.1555  | 38.8578  | 43.7157 |
| AAEL001642 | 6-pyruvoyltetrahydropterin synthase, putative                          | 57.2732  | 56.4922 | 74.9531  | 68.3828  | 48.9192  | 52.4141  | 27.0768  | 40.4073 |
| AAEL009871 | 80 kda MCM3-associated protein                                         | 15.1721  | 14.5105 | 19.446   | 15.0679  | 20.1449  | 20.6169  | 3.9558   | 10.9056 |
| AAEL013179 | 8-oxoguanine DNA glycosylase                                           | 4.18039  | 5.43502 | 2.60329  | 3.44846  | 3.11328  | 3.25314  | 0.350177 | 4.29039 |
| AAEL008431 | a kinase anchor protein                                                | 87.5652  | 87.8968 | 110.425  | 116.848  | 85.1101  | 92.3673  | 34.3865  | 49.3896 |
| AAEL008134 | abc transporter                                                        | 19.6904  | 21.4492 | 15.3064  | 16.8136  | 34.528   | 31.7864  | 310.665  | 172.023 |
| AAEL008629 | abc transporter                                                        | 13.1108  | 12.9758 | 6.69266  | 4.34709  | 7.36198  | 6.50179  | 548.744  | 277.461 |
| AAEL008632 | abc transporter                                                        | 6.72101  | 7.30183 | 8.21793  | 8.50546  | 12.8173  | 10.1071  | 163.179  | 72.428  |
| AAEL005491 | abc transporter                                                        | 1.5971   | 1.86031 | 4.9849   | 22.5308  | 3.4108   | 1.97802  | 2.59782  | 2.19455 |
| AAEL013372 | abc transporter                                                        | 11.0335  | 7.8628  | 17.8116  | 49.5856  | 8.90582  | 7.72676  | 0.59932  | 4.62222 |
| AAEL014428 | abc transporter                                                        | 13.1376  | 10.5539 | 2.34071  | 3.72588  | 3.77969  | 3.62635  | 0.845313 | 5.44866 |
| AAEL006634 | acetyl-coa acetyltransferase, mitochondrial (acetoacetyl-coa thiolase) | 60.7542  | 94.6843 | 52.9049  | 38.5685  | 67.8605  | 57.0149  | 72.2614  | 67.1843 |
| AAEL006307 | acetyl-coa carboxylase                                                 | 99.6515  | 111.723 | 77.786   | 83.116   | 112.218  | 95.2982  | 27.6328  | 53.5035 |
| AAEL003903 | acid phosphatase-1                                                     | 87.3432  | 83.3273 | 90.2318  | 71.181   | 42.0658  | 46.8424  | 165.311  | 125.319 |
| AAEL010482 | acidic membrane protein, putative                                      | 38.2878  | 28.9458 | 19.9623  | 28.461   | 33.4642  | 36.9995  | 13.3345  | 33.771  |
| AAEL008216 | aconitase                                                              | 57.8606  | 55.9532 | 15.5171  | 30.7432  | 52.5775  | 50.3872  | 186.438  | 116.445 |
| AAEL011197 | actin                                                                  | 920.489  | 863.89  | 1091.58  | 1000.51  | 733.046  | 748.352  | 5110.94  | 2251.43 |
| AAEL011750 | actin                                                                  | 26.273   | 25.3204 | 55.1915  | 48.0128  | 16.6344  | 15.6401  | 121.03   | 66.0227 |
| AAEL012310 | actin                                                                  | 36.382   | 35.3001 | 34.6801  | 34.2249  | 29.2874  | 25.2288  | 168.071  | 77.9085 |
| AAEL004616 | actin                                                                  | 77.7993  | 75.81   | 76.54    | 74.3945  | 27.7873  | 35.4406  | 596.694  | 298.307 |
| AAEL011317 | actin                                                                  | 25.2647  | 26.2789 | 38.9663  | 34.0696  | 34.6179  | 36.1471  | 13.8835  | 20.0393 |
| AAEL004646 | actin                                                                  | 0.138715 | 0       | 0.131454 | 0.075892 | 0.254474 | 0.370131 | 151.066  | 55.4105 |
| AAEL013661 | actin binding protein, putative                                        | 133.605  | 125.565 | 220.096  | 257.937  | 32.4218  | 33.981   | 585.51   | 345.807 |
| AAEL005424 | actin binding protein, putative                                        | 102.546  | 80.9836 | 178.078  | 145.78   | 81.3068  | 75.124   | 29.4386  | 64.6738 |
| AAEL011972 | actin binding protein, putative                                        | 40.2678  | 43.1675 | 31.0509  | 25.0363  | 35.9273  | 40.4326  | 187.743  | 91.1577 |
| AAEL007546 | actinlated protein 2/3 complex subunit 1A                              | 43.8203  | 45.8232 | 48.1674  | 46.5838  | 56.2426  | 57.2731  | 374.85   | 170.904 |
| AAEL001711 | activin receptor type I, putative                                      | 20.7601  | 19.802  | 19.0846  | 19.4965  | 19.4019  | 18.9835  | 6.26433  | 13.4038 |
| AAEL007555 | acyl-coa dehydrogenase                                                 | 62.0017  | 90.2358 | 16.3648  | 11.8423  | 30.9545  | 34.6188  | 40.414   | 62.3521 |
| AAEL004739 | acyl-coa dehydrogenase                                                 | 56.094   | 60.7301 | 75.9965  | 119.53   | 64.1384  | 57.8725  | 73.5126  | 57.0963 |
| AAEL008574 | acyl-CoA oxidase                                                       | 25.9415  | 27.1291 | 18.0168  | 20.1387  | 26.8467  | 21.2334  | 658.207  | 326.019 |

|            |                                                          |          |          |          |          |         |          |          |          |
|------------|----------------------------------------------------------|----------|----------|----------|----------|---------|----------|----------|----------|
| AAEL008841 | acyl-CoA oxidase                                         | 4.31102  | 5.07967  | 3.14108  | 3.92567  | 7.46103 | 6.45365  | 160.687  | 71.5247  |
| AAEL003569 | acyl-coa thioesterase                                    | 10.0048  | 9.73181  | 12.8002  | 15.4925  | 15.7596 | 16.4802  | 60.0692  | 23.8336  |
| AAEL005992 | adam (a disintegrin and metalloprotease                  | 0.391161 | 0.359409 | 5.71591  | 15.2563  | 3.44887 | 0.654253 | 9.34046  | 3.15946  |
| AAEL005364 | adaptin, alpha/gamma/epsilon                             | 1.23398  | 1.11176  | 1.37398  | 1.32475  | 2.06492 | 1.74944  | 75.6704  | 31.8642  |
| AAEL005662 | adenosine diphosphatase                                  | 55.1602  | 58.8617  | 54.5054  | 60.1675  | 53.5391 | 52.9348  | 206.481  | 101.439  |
| AAEL001856 | adenosine kinase                                         | 29.4101  | 28.6145  | 43.1595  | 37.2102  | 18.8757 | 17.9785  | 8.05156  | 16.6387  |
| AAEL001102 | adenosine kinase                                         | 88.1867  | 93.5266  | 117.913  | 113.508  | 198.602 | 199.315  | 57.2054  | 67.356   |
| AAEL005383 | Adenosine monophosphate-protein transferase FICD homolog | 47.4617  | 41.5805  | 53.6896  | 72.8428  | 21.5778 | 23.9558  | 7.45375  | 27.524   |
| AAEL008341 | adenosylhomocysteinase                                   | 66.3543  | 74.11    | 58.7641  | 51.8471  | 161.388 | 164.112  | 38.6609  | 53.7422  |
| AAEL005177 | adenylate cyclase                                        | 26.8325  | 28.39    | 33.5096  | 33.0777  | 14.0486 | 15.461   | 190.711  | 102.437  |
| AAEL009314 | adenylate cyclase                                        | 1.35791  | 0.753159 | 91.0577  | 25.3825  | 2.61328 | 3.24937  | 0.679218 | 0.84256  |
| AAEL001687 | adenylate cyclase                                        | 0.654551 | 0.288342 | 0.84136  | 1.07863  | 0.70405 | 0.602728 | 107.602  | 42.0307  |
| AAEL001691 | adenylate cyclase                                        | 33.837   | 30.9515  | 21.1743  | 30.4605  | 27.5221 | 28.447   | 6.40537  | 17.062   |
| AAEL012731 | adenylate kinase 1, putative                             | 79.0981  | 83.5514  | 51.5533  | 40.3597  | 99.8673 | 99.3894  | 47.8565  | 72.8252  |
| AAEL005605 | adenylsulfate kinase                                     | 26.378   | 27.3627  | 19.6339  | 25.7325  | 13.2055 | 13.3405  | 162.824  | 85.7798  |
| AAEL011821 | adenylyl cyclase-associated protein                      | 23.6675  | 22.9147  | 30.6362  | 16.9281  | 16.6635 | 17.3854  | 253.463  | 114.735  |
| AAEL013074 | adenylyl cyclase-associated protein                      | 29.5594  | 27.7199  | 39.6721  | 25.3152  | 21.5307 | 18.9935  | 283.547  | 105.229  |
| AAEL014717 | adiponectin receptor                                     | 75.1139  | 110.648  | 98.2327  | 232.019  | 102.259 | 131.802  | 236.389  | 130.532  |
| AAEL004855 | adp,atp carrier protein                                  | 938.076  | 1012.7   | 939.151  | 800.491  | 2219.3  | 2156.17  | 1477.98  | 1153.86  |
| AAEL007209 | ADPbosylation factor, putative                           | 31.1411  | 30.232   | 63.5988  | 55.9045  | 23.9413 | 21.0789  | 117.573  | 55.2566  |
| AAEL014379 | adrenodoxin                                              | 54.3481  | 67.1709  | 28.6785  | 27.5762  | 66.1565 | 60.0478  | 376.472  | 177.112  |
| AAEL004393 | afadin (af-6 protein)                                    | 9.56498  | 10.6542  | 11.4634  | 10.7304  | 12.1243 | 12.0641  | 51.2285  | 18.0893  |
| AAEL009872 | alanine aminotransferase                                 | 33.1065  | 30.8782  | 62.414   | 110.052  | 42.3967 | 36.9063  | 232.674  | 138.465  |
| AAEL009875 | alanine aminotransferase                                 | 98.8901  | 117.866  | 16.3625  | 8.74336  | 31.6748 | 40.5229  | 2.41271  | 39.0252  |
| AAEL005821 | alanyl aminopeptidase                                    | 0.183469 | 0.084826 | 0.081499 | 0.070663 | 1.18874 | 2.01975  | 398.891  | 194.386  |
| AAEL005808 | alanyl aminopeptidase                                    | 1.67812  | 1.73783  | 0.226992 | 0.224038 | 1.34978 | 0.688957 | 218.791  | 97.5525  |
| AAEL011130 | alcohol dehydrogenase                                    | 25.6957  | 9.45769  | 22.45    | 64.2899  | 43.2978 | 34.5682  | 4.81002  | 1.5656   |
| AAEL012457 | alcohol dehydrogenase                                    | 0.522052 | 0.205146 | 1.38625  | 1.40434  | 1.31787 | 2.12041  | 192.89   | 66.1818  |
| AAEL011126 | alcohol dehydrogenase                                    | 8.31078  | 3.94485  | 14.8713  | 31.0742  | 10.6451 | 8.91807  | 0.803701 | 0.598906 |
| AAEL015034 | alcohol dehydrogenase                                    | 29.3683  | 27.4435  | 43.1489  | 41.975   | 15.8022 | 18.8063  | 7.80694  | 25.7123  |
| AAEL011756 | aldehyde dehydrogenase                                   | 63.6694  | 94.8477  | 9.57193  | 3.53899  | 29.1936 | 23.1566  | 928.601  | 559.168  |
| AAEL009664 | aldehyde dehydrogenase                                   | 2.16762  | 2.29373  | 2.40905  | 2.73551  | 1.10051 | 1.68028  | 110.929  | 57.3745  |
| AAEL006163 | aldehyde oxidase                                         | 0        | 0        | 0.054083 | 3.7441   | 0       | 0        | 0        | 0.023408 |
| AAEL010384 | aldehyde oxidase                                         | 0.82775  | 0.847586 | 4.23649  | 3.07126  | 2.83905 | 2.518    | 148.362  | 60.2795  |

|            |                                                     |          |          |          |          |          |          |          |         |
|------------|-----------------------------------------------------|----------|----------|----------|----------|----------|----------|----------|---------|
| AAEL006157 | aldehyde oxidase                                    | 0        | 0        | 1.07641  | 15.3227  | 0.022071 | 0        | 0.075845 | 0       |
| AAEL010382 | aldehyde oxidase                                    | 0.671116 | 0.360225 | 1.25057  | 0.927272 | 5.46883  | 2.46606  | 128.207  | 57.3939 |
| AAEL009948 | ALDH9948                                            | 30.235   | 33.4149  | 64.391   | 40.8464  | 24.6685  | 22.8673  | 44.5485  | 25.4909 |
| AAEL008663 | aldo-keto reductase                                 | 11.4185  | 14.1742  | 8.32742  | 8.50209  | 4.61821  | 4.02841  | 110.572  | 55.713  |
| AAEL004088 | aldo-keto reductase                                 | 107.229  | 117.544  | 183.268  | 225.692  | 134.543  | 126.062  | 326.233  | 195.21  |
| AAEL009134 | aldo-keto reductase                                 | 0        | 0        | 0.109927 | 0.063961 | 1.24675  | 0.075081 | 273.57   | 121.12  |
| AAEL004118 | aldo-keto reductase                                 | 34.776   | 41.5388  | 44.0201  | 31.2111  | 33.506   | 32.5818  | 414.501  | 226.345 |
| AAEL004086 | aldo-keto reductase                                 | 14.1211  | 13.1771  | 11.9512  | 7.95055  | 14.7616  | 16.1755  | 98.7268  | 48.3256 |
| AAEL003154 | aldo-keto reductase                                 | 26.4711  | 13.77    | 2.81546  | 2.19018  | 5.71849  | 5.20498  | 4.03467  | 8.34019 |
| AAEL015291 | aldose 1-epimerase, putative                        | 27.0771  | 29.1052  | 10.058   | 11.6011  | 7.35125  | 6.82837  | 3.97134  | 18.134  |
| AAEL010590 | aldose-1-epimerase                                  | 6.31034  | 5.54742  | 4.70041  | 4.96364  | 5.86992  | 5.66563  | 102.134  | 38.2106 |
| AAEL015070 | alkaline phosphatase                                | 0        | 0.033318 | 0        | 0.072605 | 0.129914 | 0        | 70.8888  | 24.4928 |
| AAEL000931 | alkaline phosphatase                                | 55.449   | 45.4973  | 167      | 106.349  | 48.8552  | 48.9904  | 34.2567  | 31.1231 |
| AAEL003309 | alkaline phosphatase                                | 9.00228  | 5.73644  | 7.70927  | 7.74325  | 4.50832  | 6.30004  | 2113.86  | 1058.83 |
| AAEL011175 | alkaline phosphatase                                | 0        | 0.053034 | 0        | 0        | 0.254141 | 0.184946 | 185.628  | 78.7772 |
| AAEL003298 | alkaline phosphatase                                | 1.17478  | 1.05515  | 0.598223 | 0.346096 | 3.60759  | 6.18346  | 4879.11  | 1719.54 |
| AAEL009077 | alkaline phosphatase                                | 12.9406  | 12.1315  | 44.5844  | 97.4289  | 7.53479  | 8.47036  | 0.462733 | 7.51877 |
| AAEL003286 | alkaline phosphatase                                | 0.818323 | 0.825199 | 0.698219 | 0.269064 | 2.07186  | 3.75093  | 4565.13  | 1410.26 |
| AAEL010405 | alkyldihydroxyacetonephosphate synthase             | 1.68955  | 2.27725  | 0.795403 | 0.604869 | 2.04085  | 2.34797  | 57.0121  | 25.6049 |
| AAEL014045 | allantoicase                                        | 3.15514  | 2.74008  | 7.64747  | 23.1137  | 7.45455  | 11.085   | 10.9022  | 5.54359 |
| AAEL005997 | allergen, putative                                  | 381.027  | 332.276  | 223.955  | 308.398  | 207.806  | 202.293  | 25.4449  | 163.757 |
| AAEL000244 | alpha(1,3)fucosyltransferase                        | 0.540906 | 0.50375  | 1.49579  | 2.80508  | 1.16322  | 1.10875  | 46.0818  | 20.1217 |
| AAEL009658 | alpha, alpha-trehalase                              | 55.2222  | 55.353   | 87.8751  | 58.1537  | 53.7749  | 48.6174  | 83.513   | 59.414  |
| AAEL000678 | alpha-amylase                                       | 0.083065 | 0.065453 | 0.062616 | 0.023962 | 0.049985 | 0.108791 | 83.5286  | 38.0956 |
| AAEL000667 | alpha-amylase                                       | 5.39572  | 4.5899   | 9.60406  | 8.28175  | 6.95432  | 8.20766  | 1364.71  | 626.21  |
| AAEL003434 | alpha-amylase                                       | 2.14971  | 2.00374  | 2.23671  | 2.162    | 3.12387  | 3.54174  | 877.308  | 350.76  |
| AAEL010536 | alpha-amylase                                       | 8.87846  | 9.06497  | 11.8706  | 11.2573  | 7.64501  | 8.60176  | 0.726158 | 4.32646 |
| AAEL000642 | alpha-amylase                                       | 24.2631  | 17.6479  | 2.25845  | 3.29331  | 8.68171  | 9.94221  | 258.926  | 117.199 |
| AAEL010389 | alpha-esterase                                      | 3.02676  | 3.50062  | 4.02419  | 4.31305  | 2.97368  | 3.45963  | 169.881  | 91.4278 |
| AAEL005188 | alpha-galactosidase/alpha-n-acetylgalactosaminidase | 0.198187 | 0.60423  | 0.206802 | 0.171487 | 0.143176 | 0.156032 | 1015     | 1087.81 |
| AAEL005460 | alpha-galactosidase/alpha-n-acetylgalactosaminidase | 11.0341  | 9.75191  | 7.64502  | 37.7461  | 9.25019  | 9.47399  | 215.418  | 111.057 |
| AAEL005481 | alpha-glucosidase                                   | 17.9737  | 16.9658  | 37.2684  | 32.5704  | 21.1145  | 22.9111  | 134.533  | 64.1394 |
| AAEL004369 | alpha-glucosidase                                   | 1.39372  | 0.177614 | 1.75322  | 0.738442 | 0.411098 | 1.3019   | 1023.58  | 413.99  |

|            |                                                             |          |          |          |          |          |         |          |         |
|------------|-------------------------------------------------------------|----------|----------|----------|----------|----------|---------|----------|---------|
| AAELO10653 | alpha-l-fucosidase                                          | 6.5881   | 7.36896  | 2.40793  | 2.77052  | 9.35087  | 7.17641 | 1299.18  | 707.448 |
| AAELO05477 | amidase                                                     | 49.0712  | 47.3802  | 23.6709  | 32.7191  | 46.773   | 49.2194 | 369.79   | 173.849 |
| AAELO03581 | amidophosphoribosyltransferase                              | 80.0358  | 120.197  | 39.8379  | 28.2779  | 72.0696  | 71.503  | 11.7669  | 44.82   |
| AAELO08913 | amino acid transporter                                      | 0.671157 | 0.629874 | 0.117691 | 0.10935  | 0.631842 | 1.3088  | 390.968  | 184.382 |
| AAELO07458 | amino acid transporter                                      | 19.8461  | 14.0004  | 29.5538  | 19.9634  | 8.50511  | 8.86694 | 0.248954 | 8.94571 |
| AAELO07197 | amino acid transporter                                      | 36.3213  | 32.9238  | 13.2527  | 11.4431  | 29.1595  | 25.2422 | 10.6304  | 20.3139 |
| AAELO03970 | amino acid transporter                                      | 38.258   | 31.0336  | 5.78701  | 35.8846  | 8.9271   | 12.8002 | 502.839  | 219.415 |
| AAELO07191 | amino acid transporter                                      | 0.305324 | 0.397181 | 0.184498 | 0.133869 | 0.442893 | 1.04969 | 242.506  | 124.226 |
| AAELO14161 | amino acids transporter                                     | 59.6094  | 64.248   | 27.816   | 43.0948  | 41.8365  | 44.1042 | 36.4828  | 43.856  |
| AAELO10276 | aminomethyltransferase                                      | 38.8538  | 68.6871  | 8.93251  | 3.94989  | 47.4294  | 42.9385 | 0.952755 | 15.9536 |
| AAELO00101 | AMP dependent coa ligase                                    | 20.4687  | 20.6761  | 3.0186   | 4.46905  | 6.07429  | 4.9873  | 230.604  | 105.317 |
| AAELO00415 | AMP dependent coa ligase                                    | 50.5984  | 48.2244  | 125.614  | 141.322  | 37.5682  | 32.4217 | 15.8845  | 29.2842 |
| AAELO00572 | AMP dependent ligase                                        | 61.5089  | 53.1677  | 44.622   | 70.6621  | 24.3622  | 24.3735 | 14.9135  | 35.7024 |
| AAELO10853 | AMP dependent ligase                                        | 0.058303 | 0        | 0.230465 | 0.193001 | 0.053156 | 3.6421  | 0        | 6.61597 |
| AAELO13611 | AMP dependent ligase                                        | 1.62345  | 1.31558  | 1.95121  | 2.61115  | 2.27472  | 2.92023 | 1217.3   | 641.497 |
| AAELO02668 | AMP dependent ligase                                        | 8.82928  | 8.36301  | 22.2758  | 11.9717  | 14.6244  | 13.8305 | 12.1019  | 9.1285  |
| AAELO12431 | AMP dependent ligase                                        | 11.4842  | 12.2309  | 20.7847  | 25.1517  | 7.72426  | 7.08226 | 0.399276 | 6.19396 |
| AAELO06823 | AMP dependent ligase                                        | 4.86096  | 5.69478  | 4.10523  | 4.13213  | 4.31904  | 3.75582 | 415.267  | 195.069 |
| AAELO01501 | anamorsin, putative                                         | 34.2574  | 34.6986  | 35.6602  | 33.0473  | 33.4853  | 28.8386 | 105.766  | 53.0119 |
| AAELO14212 | androgen induced inhibitor of proliferation (as3) / pds5    | 32.2176  | 31.4429  | 38.8245  | 32.1788  | 41.6821  | 41.3541 | 14.9739  | 23.2051 |
| AAELO09310 | angiotensin-converting enzyme (dipeptidyl carboxypeptidase) | 1.30876  | 1.66685  | 1.45987  | 1.39453  | 1.95056  | 2.47399 | 1081.72  | 1072.24 |
| AAELO08389 | ankyrin repeat membrane-spanning protein                    | 59.3381  | 55.2955  | 102.101  | 79.721   | 49.262   | 52.8928 | 111.387  | 75.1574 |
| AAELO11302 | annexin                                                     | 109.22   | 106.16   | 93.8823  | 89.3038  | 99.8654  | 104.445 | 361.49   | 133.743 |
| AAELO05407 | annexin x                                                   | 19.979   | 17.1789  | 41.1909  | 22.8116  | 17.0166  | 17.708  | 4.98002  | 10.3955 |
| AAELO06511 | anopheles stephensi ubiquitin                               | 1236.97  | 1267.28  | 611.222  | 544.215  | 3568.58  | 3637.2  | 2252.19  | 1871.97 |
| AAELO03921 | anopheles stephensi ubiquitin, putative                     | 46.7479  | 39.8965  | 69.7223  | 41.3775  | 54.1171  | 55.5766 | 24.8828  | 37.1217 |
| AAELO02554 | anosmin, putative                                           | 65.7843  | 85.8265  | 24.8763  | 29.2773  | 126.782  | 119.583 | 1.4594   | 39.9848 |
| AAELO01022 | anterior fat body protein                                   | 40.5815  | 30.9198  | 106.254  | 79.4345  | 23.6364  | 23.7507 | 249.548  | 107.14  |
| AAELO01020 | anterior fat body protein                                   | 44.6625  | 46.6068  | 41.6539  | 40.4055  | 76.1876  | 76.0188 | 210.94   | 103.058 |
| AAELO00757 | anterior fat body protein                                   | 8.5208   | 12.6446  | 8.05973  | 8.40329  | 9.57329  | 11.1277 | 554.307  | 285.446 |
| AAELO12830 | anti-silencing protein                                      | 62.1749  | 56.5636  | 100.741  | 78.9855  | 25.3678  | 26.2125 | 18.5566  | 35.5712 |
| AAELO10781 | ap endonuclease                                             | 76.6498  | 73.1435  | 154.459  | 110.285  | 41.2273  | 42.6965 | 18.2347  | 50.3517 |
| AAELO13063 | APG18A                                                      | 46.6237  | 34.1112  | 49.3441  | 70.1452  | 9.24261  | 10.0088 | 180.482  | 101.579 |

|            |                                          |          |          |          |          |          |          |          |          |
|------------|------------------------------------------|----------|----------|----------|----------|----------|----------|----------|----------|
| AAELO10641 | APG7A                                    | 54.3223  | 49.5966  | 63.6473  | 63.1594  | 47.8888  | 47.0705  | 26.2316  | 33.9912  |
| AAELO07162 | APG8                                     | 254.948  | 217.945  | 273.053  | 330.829  | 112.562  | 123.415  | 1236.71  | 688.387  |
| AAELO08789 | apolipophorin-III, putative              | 830.989  | 491.772  | 338.441  | 308.573  | 77.8832  | 63.333   | 98.633   | 255.749  |
| AAELO09569 | apolipoprotein D, putative               | 76.8495  | 80.8082  | 85.1005  | 91.8056  | 68.427   | 75.7232  | 5.95149  | 43.9352  |
| AAELO09560 | apolipoprotein D, putative               | 15.431   | 21.6747  | 4.97041  | 9.97873  | 15.0221  | 24.6741  | 54.7575  | 68.1204  |
| AAELO13574 | apolipoprotein D, putative               | 100.935  | 108.615  | 32.539   | 26.7968  | 101.637  | 103.098  | 67.4635  | 82.2376  |
| AAELO09561 | apolipoprotein D, putative               | 1.24257  | 1.43926  | 2.12588  | 1.61441  | 3.17675  | 2.96094  | 137.441  | 60.0465  |
| AAELO10986 | apyrase, putative                        | 7.43917  | 6.70834  | 11.2062  | 14.1922  | 7.86904  | 7.32408  | 306.617  | 159.449  |
| AAELO05008 | aquaporin                                | 75.5221  | 138.021  | 27.7295  | 7.41057  | 64.0202  | 64.2813  | 132.655  | 147.275  |
| AAELO03550 | aquaporin                                | 28.2255  | 24.3764  | 69.5038  | 56.4976  | 13.344   | 18.5428  | 165.68   | 75.2071  |
| AAELO07065 | Arf1                                     | 259.825  | 282.95   | 298.043  | 264.959  | 203.34   | 203.25   | 393.922  | 273.552  |
| AAELO04236 | arf6 guanine nucleotide exchange factor  | 13.1593  | 13.8891  | 13.006   | 15.1943  | 11.7803  | 11.9554  | 74.0645  | 32.1964  |
| AAELO02675 | arginase                                 | 8.31086  | 14.9102  | 14.3409  | 2.71116  | 90.7445  | 83.5892  | 0.403565 | 5.27258  |
| AAELO09185 | arginine or creatine kinase              | 199.472  | 189.962  | 162.699  | 133.987  | 73.6938  | 80.9006  | 1109.65  | 707.502  |
| AAELO06473 | arginine/serinec splicing factor         | 72.8332  | 73.5463  | 87.7361  | 85.5537  | 31.9803  | 35.8047  | 35.525   | 45.7607  |
| AAELO07286 | argininec protein, putative              | 97.5997  | 136.004  | 70.5598  | 69.5147  | 37.8218  | 44.5787  | 113.441  | 95.0667  |
| AAELO03345 | argininosuccinate lyase                  | 579.014  | 488.256  | 164.756  | 240.295  | 334.213  | 289.871  | 14.8374  | 132.65   |
| AAELO04701 | argininosuccinate synthase               | 9.91927  | 12.1611  | 16.5058  | 8.54195  | 23.7614  | 22.6776  | 0.184114 | 4.56398  |
| AAELO02887 | arm                                      | 27.1509  | 26.4345  | 18.0794  | 20.3648  | 22.9525  | 22.951   | 145.834  | 71.2483  |
| AAELO05461 | armadillo repeat protein                 | 33.1552  | 30.4489  | 36.8746  | 33.8988  | 40.6719  | 40.8294  | 11.6055  | 18.6804  |
| AAELO14238 | aromatic amino acid decarboxylase        | 71.6462  | 70.672   | 90.0481  | 102.06   | 45.9892  | 46.9836  | 1.19455  | 34.5269  |
| AAELO10735 | aromatic amino acid decarboxylase        | 0.883644 | 0.920854 | 0.936422 | 6.47741  | 0.554148 | 0.534787 | 0        | 1.08417  |
| AAELO10737 | aromatic amino acid decarboxylase        | 107.945  | 108.313  | 143.171  | 152.246  | 67.4726  | 72.5928  | 2.61819  | 52.1955  |
| AAELO09059 | arp2/3 complex 16 kd subunit (P16-arc)   | 48.2989  | 51.6363  | 46.5743  | 49.6025  | 50.3063  | 47.5573  | 286.033  | 152.882  |
| AAELO09041 | arp2/3 complex 20 kd subunit             | 31.7936  | 32.8623  | 30.762   | 28.2969  | 33.4974  | 31.7528  | 109.965  | 52.4694  |
| AAELO13168 | arrowhead                                | 21.0612  | 18.7004  | 33.5531  | 28.4719  | 10.1493  | 10.795   | 0.509882 | 7.13728  |
| AAELO15631 | asparagine synthetase                    | 2.0075   | 1.48171  | 1.20869  | 0.816372 | 6.01763  | 5.86483  | 5.97055  | 0.424205 |
| AAELO12579 | aspartate aminotransferase               | 91.555   | 97.74    | 131.259  | 125.829  | 82.0482  | 80.0009  | 48.6491  | 72.4781  |
| AAELO11518 | aspartyl-tRNA synthetase                 | 19.644   | 29.4331  | 14.1015  | 15.8001  | 17.2369  | 15.7803  | 26.7751  | 33.1224  |
| AAELO12175 | ATP synthase alpha subunit mitochondrial | 348.191  | 376.591  | 388.549  | 347.194  | 636.018  | 588.694  | 613.407  | 505.571  |
| AAELO08787 | ATP synthase alpha subunit vacuolar      | 64.1472  | 65.5573  | 70.7955  | 73.383   | 45.0865  | 48.5256  | 605.012  | 311.587  |
| AAELO02827 | ATP synthase beta subunit                | 290.032  | 302.886  | 352.276  | 299.912  | 353.347  | 337.74   | 335.058  | 305.78   |
| AAELO03393 | ATP synthase beta subunit                | 108.527  | 127.671  | 133.505  | 100.505  | 286.432  | 264.916  | 224.423  | 170.029  |
| AAELO08790 | ATP synthase coupling factor B, putative | 12.8184  | 13.6198  | 15.4877  | 14.6166  | 17.1725  | 18.0681  | 5.30769  | 12.903   |
| AAELO10823 | ATP synthase delta chain                 | 84.9839  | 94.4429  | 90.2768  | 71.0006  | 125.959  | 126.48   | 216.729  | 138.852  |

|            |                                                      |          |          |          |          |          |          |         |          |
|------------|------------------------------------------------------|----------|----------|----------|----------|----------|----------|---------|----------|
| AAELO02504 | ATP synthase delta chain, mitochondrial              | 204.479  | 223.641  | 218.757  | 184.33   | 273.816  | 267.108  | 335.458 | 278.785  |
| AAELO05798 | ATP synthase subunit beta vacuolar                   | 61.1741  | 59.8172  | 63.7403  | 63.1386  | 60.7331  | 62.3144  | 420.223 | 233.386  |
| AAELO09808 | ATP synthase subunit d                               | 53.0541  | 55.5775  | 49.6179  | 52.8172  | 42.4422  | 45.9259  | 356.898 | 191.497  |
| AAELO06256 | ATPase subunit, putative                             | 206.653  | 269.673  | 172.818  | 125.795  | 413.289  | 342.545  | 465.439 | 344.627  |
| AAELO12740 | ATPase subunit, putative                             | 667.134  | 723.711  | 780.977  | 660.198  | 826.72   | 871.892  | 1088.52 | 919.238  |
| AAELO12549 | atpase, class vi, type 11c                           | 0.171153 | 0.24977  | 0.269081 | 0.243162 | 2.25356  | 1.20389  | 133.887 | 47.1897  |
| AAELO15146 | ATP-binding cassette sub-family A member 3, putative | 4.14698  | 3.99925  | 4.27832  | 3.0948   | 7.34907  | 6.21811  | 58.8154 | 21.5971  |
| AAELO12702 | ATP-binding cassette sub-family A member 3, putative | 1.02077  | 0.91828  | 1.20555  | 1.1712   | 12.6554  | 2.97579  | 344.54  | 112.208  |
| AAELO12701 | ATP-binding cassette sub-family A member 3, putative | 5.98044  | 5.51348  | 5.82889  | 5.81949  | 10.2966  | 9.06804  | 82.0174 | 30.8528  |
| AAELO05499 | ATP-binding cassette transporter                     | 0.465102 | 0.523325 | 0.201201 | 0.314362 | 1.45096  | 1.01619  | 53.8416 | 24.7823  |
| AAELO11269 | ATP-binding cassette transporter                     | 13.6444  | 15.416   | 21.5486  | 44.7312  | 31.8866  | 31.787   | 7.83157 | 10.7727  |
| AAELO12395 | ATP-binding cassette transporter                     | 3.55958  | 3.58935  | 2.33683  | 1.68068  | 12.5585  | 3.60136  | 19.6857 | 8.22085  |
| AAELO05244 | ATP-binding cassette transporter, putative           | 7.4182   | 6.80689  | 10.3662  | 33.3808  | 6.27636  | 4.70946  | 6.3633  | 6.69413  |
| AAELO04297 | ATP-citrate synthase                                 | 167.882  | 168.667  | 113.869  | 96.7367  | 171      | 158.43   | 84.129  | 116.095  |
| AAELO05043 | ATP-dependent bile acid permease                     | 0.192543 | 0.277194 | 0.205342 | 0.342867 | 1.13901  | 0.581822 | 104.944 | 48.4464  |
| AAELO05045 | ATP-dependent bile acid permease                     | 0.184927 | 0.136435 | 0.478197 | 0.260268 | 2.42021  | 0.775337 | 87.7263 | 37.7201  |
| AAELO07512 | ATP-dependent RNA and DNA helicase                   | 17.6846  | 17.2415  | 22.0965  | 16.234   | 17.1514  | 16.9126  | 3.16372 | 9.70869  |
| AAELO13235 | ATP-dependent RNA helicase                           | 41.5365  | 42.8003  | 37.8847  | 40.7757  | 44.1406  | 43.91    | 19.5688 | 31.1515  |
| AAELO04117 | ATP-dependent RNA helicase                           | 32.3495  | 32.6111  | 24.9512  | 32.2472  | 41.2515  | 39.5626  | 14.915  | 23.8767  |
| AAELO14155 | ATP-dependent RNA helicase                           | 68.7765  | 65.5951  | 60.5758  | 66.6787  | 50.4274  | 52.3854  | 119.444 | 63.171   |
| AAELO06806 | atrial natriuretic peptide receptor                  | 1.93112  | 2.67013  | 9.66639  | 2.41544  | 5.45569  | 2.72319  | 53.7921 | 18.8546  |
| AAELO03389 | ATT                                                  | 0.373466 | 0.429452 | 1.39704  | 0.432053 | 0.413053 | 8.32031  | 1.0427  | 0.252965 |
| AAELO03388 | axis inhibition protein, axin                        | 22.1086  | 23.0885  | 34.9815  | 38.4015  | 29.3081  | 31.9331  | 6.72683 | 14.3367  |
| AAELO01337 | band 4.1-like protein 2, putative                    | 5.04573  | 5.95172  | 5.77044  | 6.79364  | 7.47755  | 6.47339  | 39.9468 | 15.2381  |
| AAELO08692 | barrier-to-autointegration factor, putative          | 73.4789  | 80.7436  | 137.779  | 107.817  | 72.826   | 64.9084  | 110.712 | 95.7156  |
| AAELO01779 | bax inhibitor                                        | 135.973  | 142.643  | 126.199  | 129.597  | 93.5407  | 95.5987  | 467.493 | 283.303  |
| AAELO06234 | beta 1,3-galactosyltransferase                       | 7.44048  | 6.97999  | 8.66369  | 7.5189   | 7.81076  | 8.2915   | 58.759  | 20.2769  |
| AAELO05845 | beta chain spectrin                                  | 40.5301  | 42.3756  | 49.2404  | 35.1524  | 33.3303  | 34.1389  | 135.32  | 75.2412  |
| AAELO06242 | beta chain spectrin                                  | 15.8735  | 15.324   | 17.8905  | 12.608   | 11.5551  | 0        | 149.897 | 54.4983  |
| AAELO09700 | beta lactamase domain                                | 21.8512  | 24.0102  | 21.0204  | 17.0475  | 21.3855  | 27.423   | 633.006 | 336.081  |

|            |                                                                                                                   |          |          |          |          |          |          |          |          |
|------------|-------------------------------------------------------------------------------------------------------------------|----------|----------|----------|----------|----------|----------|----------|----------|
| AAELO02253 | beta-1,3-n-acetylglucosaminyltransferase radical fringe (o-fucosylpeptide 3-beta-n-acetylglucosaminyltransferase) | 12.9191  | 10.6847  | 9.77727  | 5.88098  | 5.94642  | 4.59494  | 0.854501 | 7.25032  |
| AAELO05302 | beta-1,4-galactosyltransferase                                                                                    | 13.8361  | 14.7272  | 19.0375  | 16.4121  | 15.8167  | 14.5194  | 1.09777  | 5.615    |
| AAELO00105 | beta-alanine synthase, putative                                                                                   | 261.973  | 329.626  | 97.1219  | 97.492   | 31.1538  | 32.7396  | 6.01656  | 138.252  |
| AAELO04580 | beta-galactosidase                                                                                                | 0.297111 | 0.257475 | 0.371333 | 0.423308 | 0.864713 | 0.675261 | 453.395  | 194.93   |
| AAELO04661 | beta-hexosaminidase                                                                                               | 27.7123  | 25.7177  | 19.7514  | 21.2557  | 18.8016  | 17.7237  | 212.072  | 89.3321  |
| AAELO04931 | beta-hexosaminidase b                                                                                             | 5.44445  | 9.15896  | 6.47136  | 5.67857  | 14.4966  | 17.4075  | 2292.49  | 1406.7   |
| AAELO13867 | beta-mannosidase                                                                                                  | 8.9406   | 7.32431  | 6.35826  | 9.60854  | 5.12974  | 5.82958  | 361.532  | 182.911  |
| AAELO11202 | bhlhzip transcription factor bigmax                                                                               | 34.7672  | 30.5761  | 148.925  | 110.799  | 39.2067  | 47.3163  | 61.9355  | 42.2498  |
| AAELO13305 | bifunctional dihydrofolate reductase-thymidylate synthase                                                         | 79.1006  | 74.0341  | 86.8403  | 97.7417  | 47.5461  | 49.3574  | 6.36713  | 44.2472  |
| AAELO12825 | bifunctional purine biosynthesis protein                                                                          | 75.8837  | 126.326  | 40.4321  | 32.9885  | 53.1751  | 50.0963  | 56.3016  | 80.408   |
| AAELO13656 | bm-40 precursor                                                                                                   | 67.4505  | 67.1838  | 20.678   | 25.1992  | 55.8225  | 60.9902  | 9.62591  | 31.6577  |
| AAELO03861 | bmp-induced factor                                                                                                | 11.2095  | 10.8393  | 14.2106  | 12.1117  | 9.81487  | 9.19217  | 0.424575 | 5.26102  |
| AAELO13239 | bone morphogenetic protein                                                                                        | 11.8493  | 10.9949  | 4.06823  | 4.58927  | 6.10848  | 5.41605  | 0.266503 | 4.5297   |
| AAELO01684 | boule protein, putative                                                                                           | 69.1341  | 66.5032  | 62.605   | 74.541   | 48.8021  | 52.3559  | 3.65893  | 32.8324  |
| AAELO03056 | brain chitinase and chia                                                                                          | 0.623023 | 1.346    | 0.872404 | 0.460008 | 5.57405  | 5.10671  | 525.782  | 246.731  |
| AAELO02969 | brain chitinase and chia                                                                                          | 5.52337  | 3.19701  | 2.20353  | 2.24287  | 28.5871  | 11.3007  | 0.222038 | 0.766767 |
| AAELO02964 | brain chitinase and chia                                                                                          | 20.4529  | 18.9933  | 8.25123  | 6.23211  | 32.979   | 21.347   | 1.32923  | 6.32907  |
| AAELO03066 | brain chitinase and chia                                                                                          | 21.7802  | 23.6685  | 22.7367  | 21.613   | 25.9861  | 28.8473  | 10366.2  | 4646.26  |
| AAELO06147 | brain chitinase and chia                                                                                          | 4.0359   | 4.54022  | 2.6001   | 2.95949  | 4.90397  | 8.14928  | 24.4139  | 6.43944  |
| AAELO02959 | brain chitinase and chia                                                                                          | 1.51722  | 1.34526  | 0.839106 | 0.679532 | 24.0121  | 4.89937  | 0.084636 | 0.504275 |
| AAELO04918 | brat protein                                                                                                      | 40.5711  | 36.9875  | 0        | 99.5167  | 21.63    | 13.2637  | 13.6788  | 24.5372  |
| AAELO14016 | breast cancer metastasis-suppressor                                                                               | 30.6289  | 30.8546  | 52.1248  | 44.2828  | 22.9711  | 22.4394  | 10.556   | 20.6249  |
| AAELO10509 | bridging integrator                                                                                               | 22.4777  | 22.7302  | 27.0128  | 26.8171  | 21.9221  | 21.9881  | 9.72064  | 16.4112  |
| AAELO00001 | bystin                                                                                                            | 13.818   | 16.9015  | 16.4641  | 12.4278  | 23.7329  | 24.8973  | 6.27421  | 12.1972  |
| AAELO10924 | ca-activated cl channel protein                                                                                   | 7.89873  | 7.67128  | 0.140903 | 0.212879 | 0.785859 | 0.744329 | 0.053431 | 3.77685  |
| AAELO09616 | cadherin                                                                                                          | 0.42638  | 0.436127 | 0.405136 | 8.54255  | 0.452925 | 0.560903 | 0.219243 | 0.167739 |
| AAELO01038 | cak1                                                                                                              | 17.6769  | 17.2929  | 24.631   | 22.7032  | 16.3954  | 17.9146  | 4.65584  | 10.5277  |
| AAELO07494 | calcineurin b subunit                                                                                             | 25.9088  | 22.5691  | 22.2431  | 26.7629  | 30.6432  | 33.4892  | 248.094  | 115.26   |
| AAELO15549 | calcineurin b subunit                                                                                             | 4.97521  | 4.52587  | 4.92124  | 5.13453  | 8.29872  | 6.57482  | 50.2844  | 22.7875  |
| AAELO02221 | calcium and integrin-binding protein 1                                                                            | 34.2781  | 33.9696  | 47.4636  | 54.4654  | 21.9929  | 21.263   | 14.6324  | 24.0374  |
| AAELO13823 | calcium/calmodulin dependent protein kinase ii                                                                    | 15.0849  | 15.8656  | 18.8862  | 19.0899  | 13.0496  | 12.6157  | 1.58514  | 8.20368  |



|            |                                                            |          |          |          |          |          |          |          |         |
|------------|------------------------------------------------------------|----------|----------|----------|----------|----------|----------|----------|---------|
| AAELO10804 | calcium/calmodulin-dependent protein kinase kinase         | 27.4137  | 22.6063  | 16.8646  | 11.5977  | 16.0303  | 16.2089  | 0.545626 | 13.4863 |
| AAELO11441 | calcium/calmodulin-dependent protein kinase type 1 (camki) | 39.1492  | 43.067   | 60.8816  | 60.049   | 34.1353  | 34.9536  | 11.9968  | 28.3695 |
| AAELO12513 | calcium-binding protein E63-1 calcium-transporting atpase  | 0.528735 | 0.790647 | 1.3325   | 0.791465 | 1.53244  | 1.36733  | 85.9349  | 37.8419 |
| AAEL006582 | sarcoplasmic/endoplasmic reticulum type (calcium pump)     | 130.78   | 125.408  | 85.4167  | 107.255  | 89.795   | 92.1833  | 77.6463  | 91.8027 |
| AAELO11979 | calmodulin                                                 | 32.5621  | 34.4396  | 7.77059  | 10.2338  | 8.74453  | 11.5074  | 330.254  | 156.364 |
| AAEL003952 | calpain, putative                                          | 19.0481  | 21.5413  | 14.6963  | 13.3821  | 27.6798  | 25.6015  | 6.06196  | 12.8587 |
| AAEL006922 | calponin/transgelin                                        | 162.239  | 143.594  | 145.168  | 131.331  | 96.615   | 90.425   | 600.897  | 294.715 |
| AAEL001005 | calreticulin                                               | 182.558  | 255.431  | 72.5474  | 85.4835  | 74.1184  | 93.8728  | 304.876  | 220.829 |
| AAELO11773 | calreticulin                                               | 144.363  | 200.797  | 48.0587  | 58.7381  | 74.5716  | 74.7104  | 255.01   | 202.46  |
| AAEL003499 | calsyntenin-1 precursor                                    | 11.9948  | 10.0588  | 3.94725  | 4.75207  | 3.43358  | 3.66646  | 90.9194  | 44.2053 |
| AAEL001976 | camp-dependent protein kinase catalytic subunit            | 10.0937  | 10.9729  | 24.1555  | 24.4394  | 14.2288  | 15.2112  | 0.296178 | 6.63328 |
| AAELO15314 | camp-dependent protein kinase type ii regulatory subunit   | 7.71426  | 7.36553  | 11.369   | 11.9629  | 9.94807  | 9.6164   | 51.4475  | 23.2868 |
| AAEL009839 | cap binding protein                                        | 31.6034  | 31.0193  | 31.6766  | 32.4269  | 22.6821  | 23.2281  | 12.5238  | 21.201  |
| AAEL009475 | carbamoyl-phosphate synthase large chain                   | 21.222   | 20.7499  | 13.7641  | 14.4959  | 40.9638  | 35.9979  | 2.39543  | 11.129  |
| AAEL005337 | carbonic anhydrase                                         | 13.9396  | 11.706   | 234.747  | 101.746  | 2.88414  | 3.36795  | 71.6894  | 51.4067 |
| AAEL004930 | carbonic anhydrase                                         | 40.5069  | 37.7679  | 88.39    | 81.2019  | 45.588   | 52.1467  | 906.664  | 469.116 |
| AAEL008828 | carbonic anhydrase                                         | 0.144838 | 0.369954 | 0.269969 | 0.168083 | 0.397851 | 0.865941 | 88.6245  | 34.4703 |
| AAEL009330 | carbonic anhydrase II, putative                            | 0.377035 | 0.31161  | 1.83232  | 1.08493  | 9.92499  | 19.84    | 2447.7   | 1043.62 |
| AAEL009323 | carbonic anhydrase precursor                               | 0.26576  | 0.056372 | 123.666  | 54.6369  | 7.33135  | 3.44946  | 210.014  | 98.5001 |
| AAEL009691 | carboxylase:pyruvate/acetyl-coa/propionyl-coa              | 108.985  | 124.537  | 104.147  | 129.354  | 85.3939  | 75.3328  | 46.9785  | 64.7835 |
| AAEL000905 | carboxylesterase                                           | 3.64729  | 3.63967  | 4.48275  | 5.3877   | 9.38699  | 6.00036  | 221.532  | 96.2559 |
| AAEL000889 | carboxylesterase                                           | 11.9265  | 11.107   | 37.8947  | 34.1042  | 9.3747   | 12.2672  | 0.152463 | 3.67061 |
| AAEL000898 | carboxylesterase                                           | 34.8565  | 32.5488  | 35.0915  | 34.4386  | 40.1246  | 40.0735  | 202.9    | 78.5425 |
| AAELO10782 | carboxypeptidase                                           | 0.762449 | 1.86186  | 0.559733 | 0.862079 | 2.1732   | 2.16995  | 7376.93  | 3905.02 |
| AAELO10776 | carboxypeptidase                                           | 0.530469 | 0.66486  | 0.27355  | 0.211491 | 1.97916  | 3.82641  | 5104.05  | 2567.99 |
| AAEL005458 | carnitine o-acyltransferase                                | 33.3072  | 29.6771  | 41.8377  | 72.0162  | 32.2201  | 29.5205  | 75.2773  | 46.7381 |
| AAEL002323 | casein kinase                                              | 27.1249  | 22.8067  | 24.8619  | 24.6653  | 32.53    | 31.7994  | 1.64777  | 11.1235 |

|            |                                               |          |          |          |          |          |          |          |          |
|------------|-----------------------------------------------|----------|----------|----------|----------|----------|----------|----------|----------|
| AAELO12094 | casein kinase ii, alpha chain (cmgc group iv) | 123.024  | 130.062  | 102.196  | 106.504  | 138.805  | 133.315  | 97.6376  | 104.632  |
| AAELO05955 | CASPS17                                       | 1.92547  | 2.58704  | 2.08732  | 2.34496  | 1.55394  | 1.07421  | 50.4388  | 19.0633  |
| AAELO03439 | CASPS18                                       | 0        | 0.075384 | 0.093315 | 0        | 3.44321  | 0.262745 | 28.2583  | 9.5937   |
| AAELO03444 | CASPS19                                       | 0.334776 | 0.315756 | 0.098945 | 0.056934 | 2.81238  | 1.03847  | 73.7674  | 27.1631  |
| AAELO14658 | CASPS20                                       | 0        | 0        | 0.0761   | 0.055922 | 1.50087  | 1.53714  | 292.058  | 121.807  |
| AAELO14348 | CASPS8                                        | 6.58448  | 6.29951  | 1.78985  | 1.77348  | 7.97398  | 3.84427  | 119.074  | 46.9911  |
| AAELO13407 | CAT1                                          | 89.7224  | 99.0689  | 78.9036  | 80.8678  | 99.7913  | 99.4291  | 1285.66  | 660.103  |
| AAELO07599 | cathepsin b                                   | 6299.58  | 6320.17  | 4.14691  | 7.2796   | 1.97952  | 2.25606  | 110.606  | 3011.8   |
| AAELO09637 | cathepsin b                                   | 478.266  | 373.475  | 156.088  | 157.542  | 243.873  | 234.428  | 911.669  | 507.544  |
| AAELO15312 | cathepsin b                                   | 9965.59  | 9732.34  | 25.5514  | 56.0486  | 3.52054  | 3.76924  | 221.412  | 3462.41  |
| AAELO09642 | cathepsin b                                   | 1608.82  | 1594.45  | 0.697558 | 2.56142  | 4.14303  | 3.98139  | 29.3865  | 740.555  |
| AAELO12216 | cathepsin b                                   | 1676.05  | 1580.88  | 2.22104  | 3.24984  | 0.495003 | 0.624834 | 35.9527  | 2126.17  |
| AAELO02833 | cathepsin l                                   | 346.56   | 293.635  | 316.514  | 397.886  | 457.879  | 484.095  | 811.874  | 429.338  |
| AAELO06389 | cathepsin l                                   | 541.409  | 449.689  | 972.33   | 1027.19  | 150.19   | 160.752  | 10.0772  | 243.811  |
| AAELO14902 | cation efflux protein/ zinc transporter       | 26.33    | 24.2217  | 54.661   | 45.3179  | 26.2904  | 21.3733  | 66.9281  | 29.3607  |
| AAELO01239 | cation efflux protein/ zinc transporter       | 6.81391  | 1.11634  | 1.44553  | 2.05593  | 3.06004  | 1.41318  | 2.11284  | 1.65386  |
| AAELO02557 | cationic amino acid transporter               | 58.2252  | 53.7816  | 148.49   | 57.9324  | 42.5416  | 44.6453  | 3.85625  | 30.9341  |
| AAELO08902 | cation-transporting atpase fly                | 20.7417  | 21.0568  | 58.7474  | 40.3852  | 30.6708  | 26.2922  | 82.4669  | 38.3442  |
| AAELO02853 | ccaat/enhancer binding protein                | 3.60042  | 6.10731  | 0.152776 | 0.100631 | 8.91523  | 0.614003 | 17.4337  | 10.7167  |
| AAELO11751 | ccar1                                         | 31.4079  | 30.8914  | 30.3909  | 26.6676  | 15.4315  | 13.5065  | 13.0704  | 21.6744  |
| AAELO04341 | CCEAE10                                       | 6.62341  | 5.52478  | 2.18829  | 1.65585  | 9.48009  | 8.3128   | 0.249142 | 3.29542  |
| AAELO15590 | CCEJHE10                                      | 0.128975 | 0.075929 | 9.97956  | 45.3024  | 0.087416 | 0.031606 | 0.071774 | 0.108268 |
| AAELO05198 | CCEJHE2F                                      | 0.03065  | 0.036169 | 7.90972  | 51.4698  | 0.027338 | 0.030139 | 0        | 0.051624 |
| AAELO05182 | CCEJHE4F                                      | 0.130292 | 0.229677 | 83.763   | 142.767  | 0.17775  | 0.095869 | 0.216565 | 0.165225 |
| AAELO09400 | ccr4-associated factor                        | 88.4831  | 86.6602  | 128.393  | 112.484  | 70.5461  | 66.2606  | 17.3348  | 54.8899  |
| AAELO11500 | Cdc42 protein, putative                       | 6.45256  | 6.41621  | 13.0789  | 9.35415  | 9.71925  | 7.49357  | 218.404  | 105.902  |
| AAELO12339 | cdk1                                          | 9.15998  | 8.49367  | 17.2675  | 16.7084  | 1.05276  | 1.1817   | 0.479729 | 4.16771  |
| AAELO08621 | cdk1                                          | 41.3101  | 37.8529  | 71.1927  | 69.5687  | 24.7669  | 23.2465  | 5.65032  | 22.7276  |
| AAELO00627 | CECA                                          | 0        | 0        | 0        | 23.6197  | 2.95653  | 22.1999  | 0        | 0        |
| AAELO04223 | CECB                                          | 0        | 0        | 14.641   | 19.7656  | 75.6512  | 94.8143  | 9317.64  | 5138.19  |
| AAELO00598 | CECD                                          | 8.79978  | 0        | 23.0968  | 7.33895  | 66.9018  | 169.905  | 41.6176  | 5.40842  |
| AAELO00611 | CECE                                          | 57.6952  | 0        | 151.912  | 130.319  | 518.766  | 403.119  | 26.2734  | 0        |
| AAELO00625 | CECF                                          | 12.6296  | 0        | 2.2785   | 26.1567  | 70.5723  | 60.6711  | 278.3    | 28.5072  |
| AAELO15515 | CECG                                          | 3.13851  | 0        | 31.3471  | 56.638   | 229.9    | 177.97   | 0        | 0        |

|             |                                                       |          |          |          |          |          |          |          |         |
|-------------|-------------------------------------------------------|----------|----------|----------|----------|----------|----------|----------|---------|
| AAELO17211  | CECH                                                  | 3.11774  | 0        | 2.23281  | 10.3432  | 8.52579  | 33.4826  | 1733.4   | 844.434 |
| AAELO00621  | CECN                                                  | 69.3293  | 11.326   | 99.03    | 82.8992  | 348.352  | 410.676  | 129.503  | 32.8904 |
| AAELO12821  | ced-6                                                 | 49.3992  | 43.2566  | 38.3075  | 38.6434  | 52.699   | 45.787   | 9.3718   | 32.5321 |
| AAELO12967  | ced-6                                                 | 61.8938  | 64.6456  | 39.1296  | 40.4565  | 65.4358  | 62.1671  | 21.2779  | 33.661  |
| AAELO08827  | cell adhesion molecule                                | 11.6495  | 14.4153  | 21.2139  | 19.1936  | 3.67312  | 4.13176  | 3.8088   | 9.8338  |
| AAELO04477  | cell division control protein                         | 46.0497  | 45.2926  | 41.7333  | 40.9298  | 28.0428  | 29.0609  | 28.2548  | 35.0425 |
| AAELO14025  | cell division cycle 20 (cdc20) (fizzy)                | 50.6718  | 46.4116  | 75.6224  | 62.7838  | 19.2509  | 18.5112  | 1.73635  | 24.6385 |
| AAELO07783  | centromere protein-A, putative                        | 46.2773  | 46.4026  | 97.9685  | 79.6274  | 33.9855  | 37.1011  | 0.882716 | 25.8658 |
| AAELO03514  | centromere/microtubule binding protein<br>cbf5        | 63.866   | 71.5335  | 86.8544  | 73.869   | 95.5114  | 87.3662  | 19.57    | 40.3936 |
| AAELO11678  | centrosomal protein, putative                         | 7.74432  | 7.74656  | 9.14495  | 8.83449  | 6.07079  | 5.9357   | 3.03167  | 8.09636 |
| AAELO07030  | ceramidase                                            | 27.6356  | 25.4098  | 28.1324  | 24.1081  | 17.2923  | 18.4383  | 594.048  | 284.078 |
| AAELO13214  | cgrp-dependent protein kinase                         | 1.58842  | 1.38426  | 0.287867 | 0.168518 | 1.13814  | 0.907666 | 235.079  | 91.1559 |
| AAELO05165  | chaperone protein dnaj                                | 402.398  | 403.943  | 586.504  | 517.486  | 552.209  | 535.814  | 480.3    | 348.762 |
| AAELO09320  | chaperonin                                            | 107.721  | 110.852  | 111.629  | 99.4054  | 170.403  | 175.747  | 62.3574  | 73.7749 |
| AAELO11584  | chaperonin-60kD, ch60                                 | 65.2325  | 73.9336  | 95.559   | 95.4532  | 75.9159  | 72.2643  | 29.3062  | 52.3517 |
| AAELO13119  | charged multivesicular body protein                   | 14.3178  | 15.1502  | 15.8271  | 14.4111  | 16.2794  | 11.3371  | 66.5062  | 32.1844 |
| AAELO01336  | charged multivesicular body protein 2a                | 29.5776  | 28.2624  | 34.1154  | 30.9114  | 32.1012  | 29.8436  | 152.004  | 71.0606 |
| AAELO01698  | charged multivesicular body protein 4b                | 34.7304  | 32.8505  | 31.4937  | 27.4703  | 41.6206  | 39.8982  | 123.024  | 62.6449 |
| AAELO13066  | checkpoint kinase                                     | 55.3419  | 50.7686  | 74.7599  | 54.8443  | 60.9553  | 57.6607  | 14.7919  | 38.5835 |
| AAELO05618  | chitin synthase                                       | 0.144346 | 0.213291 | 0.118832 | 0.136838 | 2.42127  | 1.7215   | 360.397  | 136.719 |
| AAELO07547  | chloride channel protein                              | 28.44    | 29.279   | 33.7051  | 35.0166  | 45.9483  | 47.5875  | 69.7276  | 34.3568 |
| AAELO10245  | chloride channel, putative                            | 29.0936  | 30.7481  | 25.4324  | 21.7691  | 24.4426  | 25.5848  | 16.622   | 22.9194 |
| AAELO07761  | chloride intracellular channel                        | 41.8189  | 41.2484  | 74.3063  | 77.3642  | 33.8911  | 32.427   | 174.554  | 97.2127 |
| AAELO05977  | chondroitin 4-sulfotransferase                        | 0.222928 | 0.347876 | 16.8763  | 6.58521  | 0.889916 | 1.0308   | 33.6     | 12.9754 |
| AAELO14365  | chromaffin granule amine transporter,<br>putative     | 95.1492  | 92.7571  | 119.567  | 105.612  | 83.6668  | 83.7683  | 1.5975   | 45.2453 |
| AAELO13940  | chromatin assembly factor i P60 subunit               | 26.0765  | 22.574   | 28.8538  | 30.6447  | 16.8244  | 17.7342  | 1.69906  | 14.6182 |
| AAELO00173  | chromatin assembly factor-I p150 subunit,<br>putative | 39.0642  | 39.3981  | 30.798   | 27.8132  | 53.6446  | 49.1008  | 10.6063  | 29.3878 |
| AAELO13136  | chromodomain helicase DNA binding protein             | 55.726   | 52.8047  | 70.7694  | 60.715   | 70.3791  | 69.0492  | 37.0803  | 45.1098 |
| AAELO13135  | chromodomain helicase DNA binding protein             | 40.9382  | 39.9812  | 50.356   | 41.669   | 48.4896  | 48.0939  | 25.5678  | 33.1041 |
| AAELO009392 | chromosome region maintenance protein<br>5/exportin   | 38.4036  | 36.1833  | 16.6285  | 24.7675  | 36.0235  | 37.0656  | 15.5617  | 24.6093 |

|            |                                                                                                                |          |          |          |          |          |          |          |          |
|------------|----------------------------------------------------------------------------------------------------------------|----------|----------|----------|----------|----------|----------|----------|----------|
| AAELO10568 | chromosome-associated kinesin KIF4A<br>(chromokinesin)                                                         | 11.1011  | 12.0951  | 20.6044  | 18.3081  | 11.1938  | 10.464   | 1.10287  | 7.46177  |
| AAELO09680 | chymotrypsin, putative                                                                                         | 0.81602  | 0.301886 | 1.38932  | 0.836902 | 1.66027  | 3.04074  | 1223.28  | 616.003  |
| AAELO11470 | cis,cis-muconate transport protein MucK,<br>putative                                                           | 124.694  | 112.938  | 81.6384  | 77.7662  | 51.7035  | 51.7468  | 2.04823  | 63.7946  |
| AAELO10513 | class b basic helix-loop-helix protein<br>(bhlhb) (differentially expressed in<br>chondrocytes) (mdec) (sharp) | 12.142   | 12.0226  | 7.90876  | 6.99852  | 20.2918  | 18.8498  | 85.5348  | 41.6019  |
| AAELO02601 | CLIPA1                                                                                                         | 20.8877  | 20.2882  | 16.3438  | 19.9463  | 66.6592  | 62.9874  | 0.598246 | 4.96649  |
| AAELO02590 | CLIPA12                                                                                                        | 14.2392  | 14.7767  | 13.3948  | 14.893   | 22.8928  | 24.5718  | 1.54576  | 9.0413   |
| AAELO02595 | CLIPA14                                                                                                        | 109.018  | 118.573  | 89.034   | 76.8584  | 281.784  | 244.075  | 8.85063  | 38.0838  |
| AAELO02301 | CLIPA5                                                                                                         | 35.307   | 44.2294  | 22.9111  | 21.1211  | 118.824  | 103.352  | 12.6123  | 20.5642  |
| AAELO02629 | CLIPA6                                                                                                         | 68.8413  | 62.0262  | 78.5813  | 74.2772  | 97.0535  | 88.191   | 3.60168  | 28.1524  |
| AAELO00074 | CLIPB1                                                                                                         | 40.5224  | 44.7011  | 29.3709  | 29.1442  | 134.438  | 130.26   | 1.87514  | 20.3812  |
| AAELO03243 | CLIPB13A                                                                                                       | 64.9775  | 58.2237  | 81.9585  | 75.3654  | 127.822  | 84.2719  | 1.10833  | 28.8132  |
| AAELO14349 | CLIPB15                                                                                                        | 5.78101  | 5.44162  | 8.37076  | 8.44957  | 56.7061  | 36.9187  | 8.45812  | 3.99443  |
| AAELO14140 | CLIPB24                                                                                                        | 8.81507  | 11.2236  | 6.53375  | 4.98273  | 13.5557  | 10.8711  | 0.464783 | 4.80153  |
| AAELO07993 | CLIPB27                                                                                                        | 0.100158 | 0.083213 | 0.330551 | 0.13945  | 1.3016   | 2.27404  | 50.7676  | 10.8393  |
| AAELO13245 | CLIPB28                                                                                                        | 8.66673  | 8.3803   | 1.06834  | 0.9387   | 12.5532  | 11.1482  | 0.214443 | 3.27303  |
| AAELO00099 | CLIPB33                                                                                                        | 32.3274  | 37.8891  | 9.35553  | 10.6711  | 47.3277  | 46.4946  | 8.85333  | 19.6862  |
| AAELO00028 | CLIPB34                                                                                                        | 91.0975  | 104.975  | 72.3285  | 59.9826  | 244.979  | 235.689  | 8.32754  | 53.2031  |
| AAELO00037 | CLIPB35                                                                                                        | 10.6958  | 11.6691  | 16.5279  | 21.3634  | 69.91    | 71.076   | 0.364572 | 4.38974  |
| AAELO05431 | CLIPB37                                                                                                        | 8.3963   | 8.93238  | 3.9908   | 5.98534  | 19.5256  | 40.68    | 2.15919  | 3.75769  |
| AAELO03632 | CLIPB39                                                                                                        | 0.540412 | 0.236695 | 0.159126 | 0.210193 | 8.77276  | 2.05816  | 0        | 0.176654 |
| AAELO06168 | CLIPB42                                                                                                        | 14.2648  | 19.1207  | 3.79245  | 3.47222  | 12.7979  | 6.48173  | 0.757815 | 8.53239  |
| AAELO06371 | CLIPB47-76                                                                                                     | 0.170734 | 0.27381  | 0.265022 | 0.028232 | 0.369798 | 0.235831 | 55.6895  | 19.1842  |
| AAELO05064 | CLIPB5                                                                                                         | 26.9206  | 30.4815  | 51.3056  | 39.4817  | 53.7234  | 44.5243  | 1.87371  | 17.5188  |
| AAELO03625 | CLIPB8                                                                                                         | 23.1583  | 30.388   | 15.7682  | 11.5931  | 189.015  | 176.447  | 2.69887  | 10.2944  |
| AAELO12713 | CLIPC16                                                                                                        | 16.1263  | 20.3515  | 17.3854  | 13.3517  | 52.8421  | 55.5406  | 2.85629  | 7.66943  |
| AAELO07593 | CLIPC2                                                                                                         | 12.0473  | 11.828   | 15.1602  | 11.1321  | 14.2892  | 17.3198  | 0.801272 | 5.62634  |
| AAELO07597 | CLIPC3                                                                                                         | 32.1451  | 32.5579  | 27.4208  | 27.4853  | 53.1719  | 53.3022  | 1.74513  | 17.2105  |
| AAELO04540 | CLIPC6                                                                                                         | 16.7588  | 19.9208  | 20.2097  | 16.3197  | 39.555   | 34.5704  | 0.213504 | 8.40692  |
| AAELO02124 | CLIPD6                                                                                                         | 10.2698  | 12.3946  | 5.03705  | 4.35941  | 18.1117  | 13.8288  | 2.16265  | 9.16864  |
| AAELO06576 | clip-domain serine protease, putative                                                                          | 118.234  | 48.8815  | 82.7738  | 162.679  | 225.648  | 156.917  | 4.92113  | 19.3786  |
| AAELO09722 | clip-domain serine protease, putative                                                                          | 31.852   | 29.8239  | 38.3826  | 30.8352  | 68.8775  | 66.4749  | 80.397   | 38.4301  |

|            |                                                  |          |          |          |          |          |          |          |          |
|------------|--------------------------------------------------|----------|----------|----------|----------|----------|----------|----------|----------|
| AAEL001098 | clip-domain serine protease, putative            | 21.2483  | 26.2601  | 12.6787  | 18.0177  | 32.5023  | 38.3804  | 7.29759  | 18.1591  |
| AAEL000030 | clip-domain serine protease, putative            | 10.4351  | 13.5103  | 11.1045  | 7.91034  | 32.5071  | 27.5122  | 0.909712 | 7.2044   |
| AAEL003279 | clip-domain serine protease, putative            | 18.3982  | 14.4208  | 17.0161  | 12.7144  | 67.6623  | 32.9273  | 2.03807  | 11.3529  |
| AAEL010773 | CLYPE10                                          | 11.2541  | 11.7516  | 7.21337  | 9.80503  | 23.0114  | 16.4038  | 0.208505 | 3.80932  |
| AAEL005644 | CLYPE12                                          | 3.77805  | 2.85159  | 3.86003  | 3.30074  | 4.18158  | 4.5344   | 0.133905 | 3.16567  |
| AAEL007949 | clk2                                             | 10.5425  | 13.3352  | 6.99498  | 8.97504  | 9.17906  | 10.2471  | 7.15874  | 13.8612  |
| AAEL017290 | Coiled-coil domain-containing protein 72 homolog | 292.587  | 288.041  | 387.732  | 307.959  | 340.434  | 371.331  | 221.887  | 247.523  |
| AAEL005097 | cold induced protein (BnC24A), putative          | 1048.31  | 1114.41  | 426.13   | 386.877  | 3166.16  | 3101.85  | 2118.04  | 1458.67  |
| AAEL011090 | complement component                             | 96.8352  | 100.141  | 105.64   | 84.9751  | 104.412  | 96.729   | 29.2033  | 60.9137  |
| AAEL004634 | condensin                                        | 13.7287  | 13.8285  | 11.9505  | 13.5943  | 19.8893  | 20.6055  | 3.12629  | 8.58532  |
| AAEL011049 | condensin, XCAP-G'-subunit, putative             | 12.3764  | 12.6018  | 10.8935  | 13.4032  | 13.7758  | 14.3702  | 2.08152  | 7.9164   |
| AAEL003160 | conserved hypothetical protein                   | 625.267  | 582.651  | 813.919  | 960.684  | 618.346  | 634.625  | 2015.03  | 1174.92  |
| AAEL013127 | conserved hypothetical protein                   | 9.07598  | 19.7851  | 5.10721  | 7.96755  | 6.03369  | 7.51891  | 67901.9  | 39265.1  |
| AAEL013126 | conserved hypothetical protein                   | 0        | 0        | 0        | 0        | 0        | 0        | 13.1325  | 0        |
| AAEL006126 | conserved hypothetical protein                   | 0        | 6235.57  | 2.97402  | 4.12834  | 1.98609  | 2.33764  | 157.2    | 3505.79  |
| AAEL003934 | conserved hypothetical protein                   | 8.10098  | 10.8311  | 8.03186  | 11.2177  | 11.9058  | 12.7914  | 0.24727  | 3.99485  |
| AAEL003749 | conserved hypothetical protein                   | 36.2151  | 40.9495  | 64.307   | 47.1629  | 35.6316  | 37.7684  | 27.4804  | 25.2554  |
| AAEL012518 | conserved hypothetical protein                   | 0.868134 | 0.583047 | 12.3295  | 36.0719  | 26.7975  | 21.3928  | 0.872873 | 0.743167 |
| AAEL011810 | conserved hypothetical protein                   | 1.77257  | 2.55056  | 6.55472  | 3.68203  | 15.3251  | 5.19129  | 11.8691  | 6.96508  |
| AAEL001577 | conserved hypothetical protein                   | 1.05625  | 0.135588 | 1.48437  | 0.545707 | 3.42778  | 1.42324  | 1107.92  | 468.795  |
| AAEL004877 | conserved hypothetical protein                   | 24.299   | 23.683   | 34.2624  | 31.8422  | 31.6972  | 31.8263  | 4.35396  | 13.8559  |
| AAEL007017 | conserved hypothetical protein                   | 63.5811  | 62.8863  | 140.101  | 118.012  | 43.8046  | 49.2072  | 27.5998  | 45.222   |
| AAEL014377 | conserved hypothetical protein                   | 12.2699  | 12.7289  | 15.2823  | 14.6063  | 13.4871  | 12.2742  | 4.30034  | 9.76144  |
| AAEL000776 | conserved hypothetical protein                   | 245.981  | 230.733  | 536.349  | 335.378  | 113.569  | 105.772  | 2.86539  | 135.005  |
| AAEL001791 | conserved hypothetical protein                   | 28.2421  | 24.9921  | 32.8934  | 31.4396  | 17.011   | 16.9977  | 10.906   | 17.3743  |
| AAEL003756 | conserved hypothetical protein                   | 15.0334  | 15.6385  | 20.0209  | 20.0288  | 13.5242  | 15.712   | 3.69558  | 10.0505  |
| AAEL004151 | conserved hypothetical protein                   | 1927.58  | 2069.75  | 908.008  | 875.739  | 4893.6   | 4789     | 3261.76  | 2626.81  |
| AAEL007356 | conserved hypothetical protein                   | 35.7603  | 34.7531  | 40.7764  | 34.914   | 39.6953  | 39.4075  | 11.0428  | 23.6552  |
| AAEL013835 | conserved hypothetical protein                   | 0.165471 | 0.185236 | 0.111229 | 0.264086 | 0.150514 | 0.331725 | 1693.97  | 596.306  |
| AAEL014645 | conserved hypothetical protein                   | 13.7166  | 13.9712  | 17.3184  | 14.7297  | 17.3724  | 18.7419  | 5.08728  | 10.923   |
| AAEL010906 | conserved hypothetical protein                   | 36.335   | 38.0433  | 45.5504  | 44.4107  | 36.5039  | 38.9926  | 15.8345  | 27.3904  |
| AAEL000311 | conserved hypothetical protein                   | 0.161458 | 0.069604 | 63.9117  | 937.945  | 2.43932  | 2.13054  | 0.305339 | 0.234931 |
| AAEL001508 | conserved hypothetical protein                   | 6.16259  | 10.4126  | 7.32747  | 5.18172  | 14.2844  | 14.2006  | 0.284843 | 4.72286  |
| AAEL007344 | conserved hypothetical protein                   | 0.552098 | 0.433085 | 2.27573  | 2.12009  | 14.4099  | 6.28653  | 985.166  | 218.498  |

|            |                                |          |          |          |          |          |          |          |          |
|------------|--------------------------------|----------|----------|----------|----------|----------|----------|----------|----------|
| AAEL004405 | conserved hypothetical protein | 6.34134  | 6.41239  | 8.73485  | 6.64009  | 7.93041  | 6.31504  | 1.47022  | 18.8178  |
| AAEL011227 | conserved hypothetical protein | 28.7221  | 34.623   | 47.8287  | 45.1732  | 20.6193  | 25.7578  | 6.80212  | 27.6299  |
| AAEL011321 | conserved hypothetical protein | 10.7639  | 10.6526  | 11.6018  | 11.0461  | 11.9464  | 12.4591  | 2.9387   | 7.65151  |
| AAEL006862 | conserved hypothetical protein | 13.7297  | 12.6091  | 132.891  | 45.2256  | 17.054   | 16.6487  | 64.7113  | 36.4735  |
| AAEL011286 | conserved hypothetical protein | 11.8499  | 12.0329  | 4.20643  | 8.01496  | 11.1946  | 10.4921  | 1.70124  | 6.2385   |
| AAEL005453 | conserved hypothetical protein | 43.2637  | 44.7465  | 29.8478  | 39.4346  | 34.1696  | 34.037   | 7.40935  | 26.5337  |
| AAEL003332 | conserved hypothetical protein | 18.0804  | 17.5764  | 23.9675  | 23.2422  | 10.313   | 10.8819  | 3.95348  | 12.3624  |
| AAEL007173 | conserved hypothetical protein | 80.7534  | 81.9971  | 71.6563  | 110.077  | 45.5176  | 45.2726  | 166.081  | 108.694  |
| AAEL004946 | conserved hypothetical protein | 35.3165  | 36.8448  | 46.1752  | 40.3776  | 37.2389  | 35.5179  | 20.4253  | 28.5825  |
| AAEL000827 | conserved hypothetical protein | 0.294128 | 0        | 43.5819  | 326.443  | 0.132452 | 0.288223 | 0.170748 | 0.257216 |
| AAEL004055 | conserved hypothetical protein | 21.5197  | 20.7356  | 24.936   | 24.0502  | 23.6646  | 24.0852  | 3.03178  | 12.7496  |
| AAEL002597 | conserved hypothetical protein | 29.0313  | 31.1853  | 29.9259  | 31.8379  | 39.4282  | 33.758   | 186.413  | 87.4308  |
| AAEL002711 | conserved hypothetical protein | 17.997   | 17.0441  | 48.5344  | 40.6506  | 4.35593  | 5.31089  | 1.13651  | 7.21751  |
| AAEL003728 | conserved hypothetical protein | 1.62234  | 1.61437  | 1.53597  | 0.978556 | 30.5071  | 1.72771  | 148.057  | 30.7707  |
| AAEL012181 | conserved hypothetical protein | 108.891  | 106.481  | 168.81   | 148.285  | 107.846  | 104.985  | 37.4664  | 65.2887  |
| AAEL010789 | conserved hypothetical protein | 0.496996 | 0.22856  | 1.11242  | 0.462461 | 0.868558 | 1.06002  | 79.9358  | 27.7465  |
| AAEL001997 | conserved hypothetical protein | 18.8108  | 19.3041  | 25.6222  | 22.153   | 41.8641  | 40.3963  | 6.07456  | 12.2897  |
| AAEL005598 | conserved hypothetical protein | 38.8793  | 42.2727  | 44.1354  | 42.2634  | 46.4646  | 47.8369  | 26.9759  | 41.4471  |
| AAEL009604 | conserved hypothetical protein | 136.998  | 146.716  | 246.184  | 207.561  | 108.136  | 109.39   | 377.419  | 222.45   |
| AAEL011827 | conserved hypothetical protein | 27.2483  | 26.3785  | 25.0349  | 21.9933  | 31.4864  | 30.4533  | 5.50067  | 16.7331  |
| AAEL008497 | conserved hypothetical protein | 18.4536  | 20.0065  | 19.6451  | 20.1573  | 14.071   | 13.2723  | 106.421  | 47.7267  |
| AAEL007820 | conserved hypothetical protein | 69.9192  | 68.4292  | 76.66    | 79.2926  | 76.3987  | 74.1057  | 51.3626  | 55.4699  |
| AAEL013735 | conserved hypothetical protein | 31.0474  | 33.094   | 34.1796  | 35.9328  | 25.0689  | 26.0494  | 18.0803  | 25.9814  |
| AAEL009032 | conserved hypothetical protein | 18.655   | 12.3847  | 6.31717  | 20.2547  | 5.21982  | 5.55991  | 7.16347  | 7.7604   |
| AAEL008054 | conserved hypothetical protein | 1.03323  | 1.49522  | 1.35929  | 1.55448  | 0.366335 | 0.581562 | 11.3188  | 2.31013  |
| AAEL002443 | conserved hypothetical protein | 8.23721  | 7.45485  | 11.2635  | 13.3222  | 6.67571  | 6.96537  | 2.3428   | 7.81666  |
| AAEL012460 | conserved hypothetical protein | 33.6589  | 35.2589  | 42.0484  | 40.4146  | 27.2835  | 27.9088  | 21.6509  | 28.2838  |
| AAEL000397 | conserved hypothetical protein | 16.7382  | 15.2676  | 13.9103  | 15.4741  | 12.2178  | 12.4729  | 4.84256  | 10.7227  |
| AAEL014434 | conserved hypothetical protein | 1.49664  | 0.400853 | 10.8603  | 4.94841  | 5.0664   | 2.12336  | 41.5812  | 15.6039  |
| AAEL010996 | conserved hypothetical protein | 3.64928  | 3.61377  | 3.86386  | 4.21473  | 18.2446  | 10.5254  | 37.3182  | 15.1644  |
| AAEL001509 | conserved hypothetical protein | 8.80063  | 8.34728  | 5.83138  | 5.87509  | 17.3704  | 10.8593  | 169.894  | 60.9261  |
| AAEL011881 | conserved hypothetical protein | 50.3164  | 47.4872  | 44.1146  | 39.149   | 41.0341  | 39.3417  | 102.046  | 45.6587  |
| AAEL004060 | conserved hypothetical protein | 318.818  | 370.526  | 297.835  | 240.296  | 501.683  | 517.82   | 660.028  | 554.499  |
| AAEL007554 | conserved hypothetical protein | 23.2477  | 23.5775  | 30.6794  | 28.9037  | 28.4553  | 28.2622  | 6.53738  | 14.8368  |
| AAEL011343 | conserved hypothetical protein | 0.19731  | 0.299159 | 0.256501 | 0.222713 | 2.61274  | 1.54373  | 435.331  | 171.171  |

|            |                                |          |          |         |         |         |          |          |         |
|------------|--------------------------------|----------|----------|---------|---------|---------|----------|----------|---------|
| AAEL011791 | conserved hypothetical protein | 13.1455  | 14.946   | 6.8602  | 6.56361 | 10.154  | 9.2656   | 0        | 9.82989 |
| AAEL012462 | conserved hypothetical protein | 22.8616  | 20.6627  | 24.5525 | 21.5365 | 21.0545 | 21.2344  | 6.19262  | 13.7432 |
| AAEL008428 | conserved hypothetical protein | 0.817982 | 1.67406  | 3.51757 | 2.50103 | 16.1993 | 32.7656  | 3302.9   | 1355.5  |
| AAEL010877 | conserved hypothetical protein | 26.9828  | 19.9239  | 49.6921 | 47.932  | 14.7774 | 14.3061  | 2.04293  | 12.1935 |
| AAEL013585 | conserved hypothetical protein | 1.75818  | 0.916616 | 76.3531 | 207.94  | 0.54196 | 1.07806  | 0.42497  | 2.75149 |
| AAEL006617 | conserved hypothetical protein | 36.3124  | 38.0491  | 5.04568 | 2.19267 | 30.6605 | 30.644   | 17.6155  | 38.7642 |
| AAEL014276 | conserved hypothetical protein | 14.0379  | 15.2565  | 20.5844 | 17.7981 | 8.71197 | 10.0482  | 0.469311 | 7.2161  |
| AAEL002165 | conserved hypothetical protein | 0.502581 | 0.226191 | 2.94714 | 2.51064 | 2.59166 | 1.52678  | 32.3755  | 7.41499 |
| AAEL002950 | conserved hypothetical protein | 18.8771  | 19.1175  | 48.5635 | 31.7719 | 12.9414 | 12.312   | 79.9801  | 46.4788 |
| AAEL004699 | conserved hypothetical protein | 599.167  | 575.823  | 225.867 | 339.248 | 874.565 | 882.375  | 503.053  | 495.075 |
| AAEL008139 | conserved hypothetical protein | 27.3287  | 24.9838  | 39.0645 | 33.2362 | 22.9999 | 25.6955  | 68.4538  | 33.6359 |
| AAEL001385 | conserved hypothetical protein | 30.2518  | 30.1069  | 36.0524 | 29.5599 | 39.463  | 33.6926  | 103.661  | 46.5357 |
| AAEL000436 | conserved hypothetical protein | 47.1935  | 55.7329  | 50.4738 | 36.2649 | 88.9758 | 82.4842  | 22.0173  | 37.6708 |
| AAEL013887 | conserved hypothetical protein | 19.032   | 17.3504  | 27.315  | 24.8595 | 19.5289 | 18.1836  | 5.23989  | 11.3169 |
| AAEL011420 | conserved hypothetical protein | 33.1117  | 33.6028  | 16.7022 | 20.7002 | 20.6892 | 20.8455  | 14.3618  | 21.5906 |
| AAEL006681 | conserved hypothetical protein | 7.45457  | 11.2671  | 3.74817 | 5.0982  | 9.4467  | 8.10929  | 0.182867 | 3.20571 |
| AAEL000115 | conserved hypothetical protein | 25.0241  | 23.605   | 26.4366 | 26.0026 | 41.38   | 39.3802  | 8.25136  | 15.8927 |
| AAEL000165 | conserved hypothetical protein | 52.754   | 51.7868  | 112.994 | 104.077 | 187.175 | 159.884  | 3.34714  | 16.9327 |
| AAEL000191 | conserved hypothetical protein | 20.6107  | 20.3395  | 28.544  | 28.8525 | 19.1581 | 20.3088  | 171.942  | 86.2069 |
| AAEL000267 | conserved hypothetical protein | 9.98616  | 12.7151  | 10.8595 | 11.7342 | 10.4679 | 11.9673  | 0.883806 | 7.08154 |
| AAEL000328 | conserved hypothetical protein | 35.636   | 29.6184  | 33.5141 | 33.6093 | 24.0057 | 27.7397  | 220.132  | 97.9836 |
| AAEL000574 | conserved hypothetical protein | 51.9625  | 57.1138  | 46.7971 | 43.3783 | 33.9572 | 35.2271  | 29.6867  | 37.9058 |
| AAEL000650 | conserved hypothetical protein | 49.3172  | 49.1538  | 17.9529 | 17.3608 | 71.7907 | 84.0302  | 3.1461   | 15.3007 |
| AAEL000831 | conserved hypothetical protein | 0        | 0.070482 | 1.81847 | 18.1238 | 0       | 0.087974 | 0        | 0       |
| AAEL000846 | conserved hypothetical protein | 0        | 0.093675 | 10.7137 | 73.7646 | 0.07151 | 0.077531 | 0.181371 | 0       |
| AAEL000860 | conserved hypothetical protein | 13.5949  | 12.4117  | 18.8356 | 20.1644 | 10.9459 | 10.9371  | 0.817658 | 5.60506 |
| AAEL000949 | conserved hypothetical protein | 20.2238  | 19.1603  | 35.6638 | 29.6219 | 17.4297 | 16.4694  | 5.3087   | 11.4834 |
| AAEL000973 | conserved hypothetical protein | 19.7226  | 20.976   | 75.806  | 170.041 | 22.781  | 20.2464  | 0.844285 | 6.00465 |
| AAEL001104 | conserved hypothetical protein | 2.57567  | 1.49093  | 1.03522 | 6.01168 | 4.51356 | 3.99085  | 100.435  | 39.2096 |
| AAEL001271 | conserved hypothetical protein | 62.4424  | 70.9265  | 16.7043 | 19.3638 | 115.946 | 130.622  | 3.32105  | 20.6407 |
| AAEL001323 | conserved hypothetical protein | 8.31441  | 7.02883  | 39.0404 | 141.916 | 40.1949 | 24.951   | 0.32453  | 4.71402 |
| AAEL001355 | conserved hypothetical protein | 7.85982  | 8.40684  | 4.85423 | 17.9656 | 15.1552 | 13.7593  | 1.44122  | 2.71857 |
| AAEL001399 | conserved hypothetical protein | 24.4005  | 21.3551  | 32.8558 | 37.0304 | 11.8217 | 11.8969  | 2.31811  | 13.9048 |
| AAEL001425 | conserved hypothetical protein | 16.0879  | 16.9315  | 18.9764 | 18.7227 | 18.8845 | 22.7527  | 4.67829  | 11.1203 |
| AAEL001598 | conserved hypothetical protein | 18.7672  | 18.2209  | 9.33811 | 15.9324 | 15.1633 | 13.9999  | 5.85056  | 11.8353 |

|            |                                |          |          |          |          |          |          |          |          |
|------------|--------------------------------|----------|----------|----------|----------|----------|----------|----------|----------|
| AAEL001650 | conserved hypothetical protein | 4.52319  | 0.141132 | 0.086738 | 0        | 0.331135 | 4.33631  | 36.6203  | 0.429969 |
| AAEL001810 | conserved hypothetical protein | 59.8395  | 55.1257  | 64.0152  | 79.1486  | 79.6367  | 81.4322  | 35.3853  | 43.1809  |
| AAEL001959 | conserved hypothetical protein | 46.7087  | 45.4751  | 52.1283  | 60.8984  | 31.6437  | 34.121   | 333.827  | 179.731  |
| AAEL002203 | conserved hypothetical protein | 0.264391 | 0.140994 | 0.146033 | 0.412457 | 1.14745  | 1.09954  | 65.555   | 29.3615  |
| AAEL002381 | conserved hypothetical protein | 177.039  | 192.308  | 355.878  | 293.799  | 116.962  | 114.758  | 58.1015  | 88.6637  |
| AAEL002426 | conserved hypothetical protein | 14.7788  | 15.1936  | 14.3187  | 10.6899  | 11.6816  | 9.70073  | 381.952  | 208.113  |
| AAEL002435 | conserved hypothetical protein | 68.7568  | 64.8774  | 72.5856  | 71.2068  | 62.6485  | 63.8273  | 50.7287  | 57.5474  |
| AAEL002559 | conserved hypothetical protein | 14.5801  | 11.8238  | 9.03234  | 7.71297  | 20.1299  | 24.5371  | 0.463586 | 3.99359  |
| AAEL002560 | conserved hypothetical protein | 8.92283  | 7.27344  | 4.32232  | 6.2144   | 9.2025   | 6.54326  | 1144.98  | 469.05   |
| AAEL002793 | conserved hypothetical protein | 13.6585  | 13.3139  | 26.4212  | 76.176   | 12.2054  | 11.7443  | 9.09029  | 12.0434  |
| AAEL002821 | conserved hypothetical protein | 21.6729  | 21.3443  | 24.2559  | 21.746   | 14.6191  | 15.2618  | 7.56133  | 16.4088  |
| AAEL002917 | conserved hypothetical protein | 0.484226 | 0.405421 | 65.5105  | 8.27296  | 1.68888  | 1.12328  | 0.37501  | 0.11376  |
| AAEL002963 | conserved hypothetical protein | 52.4995  | 56.6897  | 100.662  | 74.8579  | 42.9328  | 38.6966  | 309.279  | 131.582  |
| AAEL002968 | conserved hypothetical protein | 49.2441  | 58.1633  | 44.6334  | 47.6588  | 53.5436  | 57.1486  | 0.677414 | 24.8608  |
| AAEL003052 | conserved hypothetical protein | 7.10838  | 0.629384 | 1.72761  | 1.13675  | 0.551229 | 0.422266 | 0.239083 | 0.059915 |
| AAEL003065 | conserved hypothetical protein | 25.0532  | 24.9632  | 40.9589  | 37.3306  | 20.1629  | 17.6212  | 8.30495  | 16.161   |
| AAEL003087 | conserved hypothetical protein | 9.44996  | 8.81171  | 13.8222  | 13.662   | 8.9687   | 10.0102  | 3.36445  | 9.10841  |
| AAEL003149 | conserved hypothetical protein | 11.5774  | 9.0665   | 13.0889  | 15.0388  | 12.874   | 11.869   | 2.16235  | 7.70263  |
| AAEL003295 | conserved hypothetical protein | 7.11714  | 4.32947  | 2.40783  | 2.97486  | 0.871364 | 0.684045 | 1.56314  | 8.60003  |
| AAEL003303 | conserved hypothetical protein | 182.041  | 190.578  | 247.903  | 171.169  | 219.265  | 209.609  | 28.8181  | 103.645  |
| AAEL003406 | conserved hypothetical protein | 10.2991  | 9.53089  | 6.28541  | 12.1349  | 6.85669  | 6.59567  | 0.867755 | 4.99534  |
| AAEL003428 | conserved hypothetical protein | 6.59209  | 6.90008  | 17.4443  | 14.3799  | 23.9039  | 18.5639  | 107.22   | 53.2868  |
| AAEL003435 | conserved hypothetical protein | 37.7137  | 37.1771  | 73.4027  | 85.1046  | 15.7678  | 15.7225  | 15.6423  | 27.4363  |
| AAEL003540 | conserved hypothetical protein | 28.6659  | 25.1973  | 19.4788  | 25.0116  | 34.105   | 32.5865  | 5.16574  | 17.4424  |
| AAEL003559 | conserved hypothetical protein | 28.6534  | 29.3742  | 45.9503  | 38.3575  | 30.0212  | 31.654   | 5.9095   | 15.2434  |
| AAEL003648 | conserved hypothetical protein | 13.4789  | 12.1365  | 11.4661  | 13.0683  | 6.31055  | 7.53072  | 1.24482  | 7.78867  |
| AAEL003738 | conserved hypothetical protein | 1.88256  | 2.52363  | 0.91074  | 0.995344 | 22.6462  | 0.797577 | 34.3785  | 6.97844  |
| AAEL003740 | conserved hypothetical protein | 1.86791  | 1.48049  | 1.45456  | 1.24901  | 29.3121  | 3.23359  | 72.6973  | 10.8174  |
| AAEL003804 | conserved hypothetical protein | 18.9886  | 11.5116  | 12.7045  | 24.7893  | 3.22411  | 2.7513   | 0.337739 | 6.35696  |
| AAEL003876 | conserved hypothetical protein | 103.515  | 63.5073  | 101.784  | 105.374  | 61.0923  | 57.2619  | 17.6242  | 45.5985  |
| AAEL003986 | conserved hypothetical protein | 402.944  | 473.388  | 58.7084  | 72.7491  | 90.2836  | 99.159   | 740.896  | 579.276  |
| AAEL004043 | conserved hypothetical protein | 1.12347  | 1.19896  | 0.737512 | 0.852692 | 1.06434  | 1.24661  | 86.6658  | 43.6778  |
| AAEL004053 | conserved hypothetical protein | 46.2404  | 49.1689  | 75.6874  | 66.2222  | 49.7751  | 52.1184  | 13.4603  | 30.0617  |
| AAEL004084 | conserved hypothetical protein | 18.1762  | 18.8418  | 31.7309  | 22.9059  | 10.9927  | 11.1309  | 1.59393  | 6.73619  |
| AAEL004169 | conserved hypothetical protein | 304.69   | 302.466  | 384.065  | 380.778  | 259.767  | 270.517  | 1138.41  | 590.52   |



|            |                                |          |          |          |          |          |          |          |          |
|------------|--------------------------------|----------|----------|----------|----------|----------|----------|----------|----------|
| AAEL004212 | conserved hypothetical protein | 2.93184  | 3.06961  | 9.8044   | 15.4933  | 11.963   | 10.1244  | 36.4081  | 14.9283  |
| AAEL004363 | conserved hypothetical protein | 51.5211  | 43.6346  | 40.4001  | 42.5255  | 43.0028  | 46.7945  | 23.1264  | 33.0563  |
| AAEL004397 | conserved hypothetical protein | 14.5416  | 14.0931  | 26.62    | 23.1875  | 13.2697  | 13.4026  | 99.377   | 50.3195  |
| AAEL004521 | conserved hypothetical protein | 86.3259  | 54.1996  | 37.9441  | 84.5334  | 61.0044  | 113.785  | 7.55186  | 62.0987  |
| AAEL004547 | conserved hypothetical protein | 57.5469  | 58.3517  | 18.8363  | 21.4638  | 110.107  | 92.3772  | 1.09621  | 12.4858  |
| AAEL004688 | conserved hypothetical protein | 24.4098  | 24.873   | 16.2465  | 18.9914  | 34.0866  | 33.6023  | 124.507  | 52.2658  |
| AAEL004706 | conserved hypothetical protein | 29.4696  | 33.7163  | 52.7121  | 39.1114  | 23.6518  | 32.4836  | 14.9731  | 27.6972  |
| AAEL004727 | conserved hypothetical protein | 13.9657  | 13.8893  | 29.4968  | 65.9931  | 13.7576  | 12.8963  | 45.8838  | 26.6699  |
| AAEL004809 | conserved hypothetical protein | 65.2524  | 94.9892  | 28.216   | 46.9168  | 102.347  | 132.47   | 35.1761  | 23.9643  |
| AAEL004845 | conserved hypothetical protein | 15.0608  | 13.5957  | 12.0327  | 12.5016  | 15.4412  | 9.61687  | 67.3454  | 32.6816  |
| AAEL004862 | conserved hypothetical protein | 16.6753  | 17.3565  | 5.64112  | 23.6341  | 2.53886  | 2.42118  | 1.03729  | 13.5459  |
| AAEL004976 | conserved hypothetical protein | 110.538  | 96.259   | 291.578  | 251.059  | 53.9552  | 67.096   | 2.70459  | 57.525   |
| AAEL004987 | conserved hypothetical protein | 48.064   | 55.4388  | 16.04    | 16.5209  | 41.2036  | 39.7563  | 1.143    | 23.2577  |
| AAEL005048 | conserved hypothetical protein | 7.40839  | 9.00624  | 12.9556  | 16.8355  | 14.3509  | 13.3854  | 56.0718  | 22.9269  |
| AAEL005110 | conserved hypothetical protein | 8.56323  | 8.90652  | 11.5993  | 11.2194  | 6.3183   | 4.54585  | 0.133468 | 6.20362  |
| AAEL005203 | conserved hypothetical protein | 10.1314  | 11.3074  | 8.73289  | 9.66917  | 24.2614  | 16.6677  | 47.1077  | 17.0159  |
| AAEL005215 | conserved hypothetical protein | 73.9281  | 70.5824  | 58.9202  | 70.427   | 56.702   | 56.0236  | 23.691   | 43.3421  |
| AAEL005224 | conserved hypothetical protein | 20.7564  | 19.234   | 25.8344  | 25.0849  | 12.8506  | 15.0866  | 5.02801  | 12.5114  |
| AAEL005262 | conserved hypothetical protein | 37.0729  | 33.3593  | 71.76    | 133.247  | 28.8601  | 27.3014  | 123.098  | 72.2293  |
| AAEL005309 | conserved hypothetical protein | 16.7285  | 15.6773  | 23.1584  | 18.283   | 14.6581  | 17.1457  | 2.83165  | 10.3951  |
| AAEL005592 | conserved hypothetical protein | 7.79262  | 8.20033  | 13.048   | 12.4218  | 7.18462  | 6.17905  | 1.69718  | 6.69035  |
| AAEL005704 | conserved hypothetical protein | 35.0296  | 35.3607  | 20.3548  | 21.5417  | 22.2623  | 22.6951  | 3.23975  | 16.6705  |
| AAEL005716 | conserved hypothetical protein | 32.3651  | 34.9625  | 7.9231   | 15.5847  | 40.7325  | 44.4071  | 3.33473  | 16.5941  |
| AAEL005736 | conserved hypothetical protein | 56.713   | 55.6233  | 57.1194  | 57.0479  | 44.4142  | 46.464   | 14.1083  | 34.7008  |
| AAEL005739 | conserved hypothetical protein | 0.365321 | 0.233975 | 0.249943 | 0.230951 | 2.60774  | 1.57924  | 367.59   | 143.268  |
| AAEL005756 | conserved hypothetical protein | 0.162818 | 0        | 380.218  | 551.984  | 0.051939 | 0        | 1.32154  | 0.90906  |
| AAEL006041 | conserved hypothetical protein | 9.32839  | 13.0204  | 8.10203  | 7.91334  | 37.9146  | 19.4607  | 22.8369  | 10.631   |
| AAEL006087 | conserved hypothetical protein | 51.4844  | 51.2153  | 41.4754  | 46.2757  | 53.1388  | 53.2976  | 16.8131  | 31.5782  |
| AAEL006124 | conserved hypothetical protein | 29.1272  | 30.285   | 43.8232  | 37.1521  | 35.0793  | 36.2998  | 14.7776  | 22.2784  |
| AAEL006208 | conserved hypothetical protein | 23.2925  | 21.1181  | 27.4979  | 25.221   | 14.1878  | 14.6995  | 3.30607  | 11.7674  |
| AAEL006328 | conserved hypothetical protein | 0.505659 | 1.11785  | 27.4175  | 537.491  | 0.837128 | 1.11873  | 0.420484 | 0.413401 |
| AAEL006364 | conserved hypothetical protein | 11.6294  | 11.6064  | 8.29645  | 17.5526  | 9.63909  | 8.50747  | 65.8375  | 27.891   |
| AAEL006408 | conserved hypothetical protein | 0.105976 | 0        | 0.082159 | 0.09498  | 0        | 0.106055 | 16.2798  | 0.172494 |
| AAEL006423 | conserved hypothetical protein | 0        | 0        | 0        | 0.356552 | 0.127865 | 0        | 15.2937  | 0        |
| AAEL006480 | conserved hypothetical protein | 124.83   | 136.098  | 47.7601  | 74.011   | 102.259  | 117.659  | 275.197  | 123.74   |

|            |                                |          |          |          |          |          |          |          |          |
|------------|--------------------------------|----------|----------|----------|----------|----------|----------|----------|----------|
| AAEL006483 | conserved hypothetical protein | 0.849799 | 1.70358  | 4.3872   | 4.69276  | 17.0346  | 47.8386  | 2197.07  | 1158.75  |
| AAEL006637 | conserved hypothetical protein | 22.0251  | 21.2764  | 24.282   | 19.8959  | 29.6408  | 26.7493  | 3.21755  | 13.8473  |
| AAEL006660 | conserved hypothetical protein | 15.6232  | 13.2689  | 26.4524  | 24.7144  | 3.89049  | 4.7277   | 1.65534  | 7.96874  |
| AAEL006663 | conserved hypothetical protein | 14.3932  | 15.2345  | 20.1529  | 11.7188  | 13.9812  | 15.2901  | 47.5756  | 18.0685  |
| AAEL006670 | conserved hypothetical protein | 11715.9  | 9558.15  | 4.95376  | 17.5539  | 8.36086  | 5.47377  | 125.472  | 6293.62  |
| AAEL006697 | conserved hypothetical protein | 12.7787  | 13.8685  | 14.9482  | 13.4141  | 20.8434  | 21.2694  | 4.82362  | 10.186   |
| AAEL006884 | conserved hypothetical protein | 15.583   | 14.5724  | 21.4079  | 19.3898  | 14.3172  | 14.9331  | 0.103326 | 5.98848  |
| AAEL006953 | conserved hypothetical protein | 0.210645 | 0.122251 | 0.114036 | 0.616394 | 1.89284  | 0.21284  | 307.769  | 378.177  |
| AAEL007096 | conserved hypothetical protein | 0.041195 | 0.096872 | 0.306433 | 88.727   | 0.149029 | 0.162284 | 0.182565 | 0.135956 |
| AAEL007114 | conserved hypothetical protein | 41.3288  | 33.555   | 31.5985  | 31.0121  | 66.7856  | 62.3432  | 185.575  | 86.9135  |
| AAEL007167 | conserved hypothetical protein | 10.7358  | 11.202   | 26.4208  | 22.6746  | 9.59046  | 11.4141  | 2.84861  | 9.1744   |
| AAEL007196 | conserved hypothetical protein | 38.8009  | 40.3502  | 66.5983  | 38.8592  | 48.0741  | 52.3357  | 12.7067  | 29.2616  |
| AAEL007241 | conserved hypothetical protein | 24.2211  | 24.4825  | 25.0659  | 27.1874  | 29.6707  | 26.0907  | 15.5986  | 22.3686  |
| AAEL007279 | conserved hypothetical protein | 17.274   | 17.595   | 32.8084  | 24.8728  | 17.1496  | 17.8794  | 3.87754  | 10.0515  |
| AAEL007296 | conserved hypothetical protein | 37.6383  | 55.882   | 20.7905  | 21.4     | 19.3592  | 20.7679  | 28.9204  | 37.1515  |
| AAEL007298 | conserved hypothetical protein | 44.9733  | 43.0184  | 18.1484  | 28.7202  | 23.362   | 22.3047  | 211.12   | 118.768  |
| AAEL007329 | conserved hypothetical protein | 32.4864  | 34.1919  | 14.4327  | 18.5424  | 19.6795  | 20.4248  | 3.75148  | 20.0043  |
| AAEL007349 | conserved hypothetical protein | 5.76924  | 5.66735  | 6.33442  | 9.36199  | 45.9046  | 32.3855  | 803.331  | 286.191  |
| AAEL007403 | conserved hypothetical protein | 1.29369  | 0.963195 | 2.12597  | 1.8269   | 3.36304  | 2.20455  | 91.4684  | 42.0612  |
| AAEL007447 | conserved hypothetical protein | 24.4921  | 24.087   | 47.4699  | 38.4602  | 10.3205  | 11.7168  | 5.56857  | 13.8771  |
| AAEL007490 | conserved hypothetical protein | 225.257  | 279.172  | 229.35   | 196.402  | 307.696  | 336.787  | 986.781  | 681.067  |
| AAEL007686 | conserved hypothetical protein | 102.811  | 95.4956  | 2.6799   | 2.199    | 15.9347  | 12.8791  | 0.485806 | 47.9299  |
| AAEL007703 | conserved hypothetical protein | 2.40592  | 1.0436   | 2.85011  | 3.26623  | 1.96003  | 12.4757  | 12.6013  | 1.63321  |
| AAEL007810 | conserved hypothetical protein | 18.527   | 17.8456  | 25.8774  | 25.543   | 11.5281  | 11.7673  | 0.94631  | 10.767   |
| AAEL007997 | conserved hypothetical protein | 2.82241  | 2.00313  | 16.2961  | 55.6931  | 1.56284  | 2.46962  | 5.12649  | 2.90056  |
| AAEL008274 | conserved hypothetical protein | 50.0507  | 57.6516  | 43.5781  | 36.8825  | 151.306  | 124.172  | 486.451  | 230.947  |
| AAEL008275 | conserved hypothetical protein | 0.319274 | 0.224423 | 0.332033 | 0.164607 | 1.6804   | 1.44026  | 218.372  | 107.988  |
| AAEL008320 | conserved hypothetical protein | 19.1327  | 18.4777  | 19.9224  | 20.5647  | 19.4362  | 18.8946  | 1.82546  | 10.2009  |
| AAEL008578 | conserved hypothetical protein | 60.0993  | 58.5101  | 69.6821  | 69.5386  | 47.861   | 48.3196  | 9.43922  | 34.9716  |
| AAEL008594 | conserved hypothetical protein | 60.1728  | 86.6042  | 30.2422  | 26.9036  | 54.3909  | 58.5696  | 64.2698  | 74.0084  |
| AAEL008793 | conserved hypothetical protein | 32.7977  | 26.1843  | 26.8222  | 34.6397  | 19.4274  | 19.6313  | 107.603  | 51.7462  |
| AAEL008833 | conserved hypothetical protein | 16.1212  | 16.6567  | 19.694   | 19.4093  | 15.2284  | 15.8411  | 5.36671  | 11.4116  |
| AAEL008834 | conserved hypothetical protein | 23.7842  | 23.9793  | 30.3008  | 22.3714  | 24.3624  | 24.4085  | 7.06334  | 14.4256  |
| AAEL008852 | conserved hypothetical protein | 36.6099  | 37.3808  | 34.6318  | 34.3265  | 69.8231  | 64.8488  | 15.4978  | 23.6827  |
| AAEL008868 | conserved hypothetical protein | 75.7885  | 68.3343  | 113.58   | 71.4039  | 99.9236  | 89.8506  | 37.3701  | 42.3046  |

|            |                                |          |          |          |          |          |          |          |          |
|------------|--------------------------------|----------|----------|----------|----------|----------|----------|----------|----------|
| AAEL009023 | conserved hypothetical protein | 22.9039  | 21.8247  | 20.0195  | 22.9431  | 25.5248  | 23.3099  | 2.39841  | 12.5071  |
| AAEL009201 | conserved hypothetical protein | 254.921  | 307.21   | 265.313  | 236.878  | 410.873  | 414.753  | 880.026  | 685.31   |
| AAEL009248 | conserved hypothetical protein | 22.5658  | 17.9851  | 25.6514  | 25.2004  | 16.0579  | 16.0118  | 2.14678  | 13.0182  |
| AAEL009278 | conserved hypothetical protein | 70.6105  | 81.4717  | 83.8941  | 73.3933  | 89.21    | 83.7968  | 92.5118  | 97.3796  |
| AAEL009422 | conserved hypothetical protein | 77.777   | 72.064   | 35.339   | 53.9183  | 52.551   | 57.9714  | 57.7963  | 91.9393  |
| AAEL009433 | conserved hypothetical protein | 0.071039 | 0.247429 | 182.618  | 641.905  | 0.317134 | 0.412889 | 0        | 0        |
| AAEL009640 | conserved hypothetical protein | 3.55072  | 3.24765  | 3.97689  | 13.0656  | 2.50345  | 2.3261   | 0.122678 | 1.16302  |
| AAEL009650 | conserved hypothetical protein | 22.718   | 27.0975  | 32.4351  | 29.297   | 32.592   | 34.5598  | 9.23443  | 21.092   |
| AAEL009669 | conserved hypothetical protein | 16.0878  | 24.9729  | 3.37975  | 1.29927  | 46.6237  | 44.0054  | 0.502167 | 6.72512  |
| AAEL009681 | conserved hypothetical protein | 13.1269  | 12.5157  | 15.0048  | 12.5262  | 14.859   | 9.633    | 105.394  | 40.7817  |
| AAEL009936 | conserved hypothetical protein | 10.0434  | 9.95766  | 22.8114  | 9.20981  | 6.93734  | 6.73706  | 6.41155  | 7.94659  |
| AAEL009964 | conserved hypothetical protein | 143.524  | 176.801  | 151.559  | 124.676  | 224.135  | 223.253  | 362.604  | 299.037  |
| AAEL010047 | conserved hypothetical protein | 23.4955  | 20.0868  | 36.5705  | 40.1111  | 18.7714  | 16.8273  | 203.687  | 115.537  |
| AAEL010095 | conserved hypothetical protein | 33.444   | 28.99    | 47.3837  | 110.39   | 31.0859  | 35.3961  | 163.086  | 95.9534  |
| AAEL010247 | conserved hypothetical protein | 17.529   | 15.2134  | 19.3915  | 20.9009  | 25.3398  | 16.2082  | 51.0072  | 21.6833  |
| AAEL010355 | conserved hypothetical protein | 12.5142  | 12.0641  | 14.2636  | 10.9182  | 12.3489  | 13.8326  | 2.46903  | 7.08339  |
| AAEL010429 | conserved hypothetical protein | 1.77849  | 1.6048   | 1.16522  | 1.43648  | 1.3485   | 1.19078  | 4092.85  | 2608.06  |
| AAEL010435 | conserved hypothetical protein | 0.283256 | 0.432704 | 0        | 0.239979 | 0.169472 | 0.184747 | 1909.93  | 961.813  |
| AAEL010444 | conserved hypothetical protein | 9.44866  | 9.52156  | 9.78758  | 8.69854  | 12.5157  | 11.2973  | 0.352896 | 4.70949  |
| AAEL010477 | conserved hypothetical protein | 0.231906 | 0.503578 | 0.462706 | 0.32481  | 0.584026 | 0.473289 | 128.051  | 66.2766  |
| AAEL010558 | conserved hypothetical protein | 54.6455  | 49.496   | 118.72   | 68.0108  | 113.011  | 127.121  | 103.464  | 44.6497  |
| AAEL010765 | conserved hypothetical protein | 226.373  | 207.76   | 208.982  | 203.723  | 201.01   | 209.883  | 811.671  | 466.762  |
| AAEL010848 | conserved hypothetical protein | 0.067408 | 0        | 0.049193 | 67.6517  | 0.061347 | 0.066937 | 0        | 0.356662 |
| AAEL010885 | conserved hypothetical protein | 14.3994  | 14.6028  | 17.1847  | 16.9476  | 19.9239  | 22.5083  | 2.46185  | 7.19433  |
| AAEL010898 | conserved hypothetical protein | 2.11679  | 1.52882  | 7.3845   | 25.0793  | 3.52692  | 4.33085  | 1.32319  | 0.920605 |
| AAEL010903 | conserved hypothetical protein | 26.1708  | 26.0646  | 34.9953  | 30.2447  | 27.8669  | 31.8939  | 8.54816  | 18.6929  |
| AAEL010943 | conserved hypothetical protein | 4.94128  | 5.17593  | 2.90356  | 2.51191  | 8.17018  | 5.34307  | 0.159652 | 3.14956  |
| AAEL011081 | conserved hypothetical protein | 26.3681  | 22.8657  | 39.1266  | 40.6457  | 21.5479  | 21.1162  | 71.9121  | 35.6132  |
| AAEL011151 | conserved hypothetical protein | 52.3066  | 33.7698  | 56.1265  | 77.6074  | 73.6085  | 58.4052  | 94.3375  | 68.6305  |
| AAEL011238 | conserved hypothetical protein | 0.238369 | 0.092236 | 150.631  | 463.402  | 0        | 0.157435 | 0.375283 | 0.279628 |
| AAEL011334 | conserved hypothetical protein | 4.99707  | 0.107226 | 0.477075 | 0.477044 | 2.17652  | 1.92175  | 179.727  | 67.9401  |
| AAEL011338 | conserved hypothetical protein | 18.2226  | 18.7307  | 3.56985  | 4.4672   | 4.37837  | 3.19243  | 2.84275  | 9.83237  |
| AAEL011342 | conserved hypothetical protein | 4.18415  | 3.27231  | 4.45446  | 3.63037  | 3.65491  | 3.04011  | 23.4112  | 7.18247  |
| AAEL011347 | conserved hypothetical protein | 4.42254  | 4.83524  | 5.97106  | 5.96097  | 10.4316  | 9.7316   | 51.6593  | 21.3938  |
| AAEL011371 | conserved hypothetical protein | 14.1382  | 17.7442  | 30.7523  | 38.9749  | 34.5269  | 16.7768  | 39.0008  | 29.0739  |

|            |                                |          |          |          |          |         |         |          |         |
|------------|--------------------------------|----------|----------|----------|----------|---------|---------|----------|---------|
| AAEL011413 | conserved hypothetical protein | 18.1925  | 16.2134  | 19.31    | 19.284   | 16.162  | 13.5966 | 2.40348  | 11.2454 |
| AAEL011551 | conserved hypothetical protein | 0.331246 | 0.209347 | 0.636262 | 0.383027 | 8.51765 | 4.49271 | 994.963  | 361.619 |
| AAEL011715 | conserved hypothetical protein | 13.4632  | 14.3837  | 8.19638  | 9.02022  | 10.3292 | 11.893  | 0.130433 | 5.52817 |
| AAEL011788 | conserved hypothetical protein | 7.9114   | 8.82714  | 12.5002  | 10.8536  | 8.30004 | 7.1074  | 0.276214 | 4.38993 |
| AAEL011865 | conserved hypothetical protein | 30.5852  | 26.5076  | 38.6736  | 38.3529  | 46.3877 | 46.5444 | 113.974  | 59.4964 |
| AAEL012023 | conserved hypothetical protein | 55.656   | 53.0129  | 38.852   | 40.4667  | 53.376  | 54.3435 | 28.4401  | 36.3602 |
| AAEL012137 | conserved hypothetical protein | 17.2564  | 18.0262  | 25.9432  | 22.2094  | 17.686  | 17.9247 | 4.7992   | 12.2898 |
| AAEL012235 | conserved hypothetical protein | 57.7685  | 59.9395  | 66.7408  | 55.4946  | 109.926 | 108.028 | 25.6257  | 37.9506 |
| AAEL012262 | conserved hypothetical protein | 43.9944  | 43.6602  | 38.0506  | 34.8127  | 39.3828 | 38.6132 | 202.049  | 116.248 |
| AAEL012382 | conserved hypothetical protein | 30.4754  | 34.158   | 49.2955  | 57.6974  | 26.5981 | 30.5776 | 1167.21  | 532.993 |
| AAEL012571 | conserved hypothetical protein | 9.44608  | 12.2773  | 15.4572  | 11.643   | 80.1933 | 54.3232 | 1.62725  | 3.02664 |
| AAEL012675 | conserved hypothetical protein | 15.3904  | 17.9471  | 17.1742  | 16.1438  | 25.8317 | 23.961  | 3.72662  | 8.66193 |
| AAEL012677 | conserved hypothetical protein | 125.659  | 126.18   | 86.6314  | 116.641  | 102.695 | 107.815 | 11.093   | 61.2755 |
| AAEL012764 | conserved hypothetical protein | 249.65   | 303.275  | 79.5219  | 52.8237  | 27.3716 | 31.7364 | 7.61775  | 105.291 |
| AAEL012865 | conserved hypothetical protein | 170.908  | 170.976  | 188.669  | 180.654  | 141.046 | 142.56  | 50.5664  | 113.909 |
| AAEL012876 | conserved hypothetical protein | 101.377  | 101.404  | 72.3498  | 79.967   | 25.414  | 25.983  | 3.14107  | 49.7313 |
| AAEL012914 | conserved hypothetical protein | 47.6316  | 45.4723  | 51.3302  | 53.2184  | 32.2815 | 34.8647 | 39.4252  | 48.6784 |
| AAEL013004 | conserved hypothetical protein | 5.84116  | 4.89711  | 9.06587  | 36.503   | 13.2867 | 14.5294 | 247.838  | 94.3645 |
| AAEL013142 | conserved hypothetical protein | 23.4579  | 23.4569  | 21.8039  | 22.7034  | 27.2319 | 27.1467 | 2.04102  | 12.4103 |
| AAEL013163 | conserved hypothetical protein | 7.91876  | 6.9134   | 5.2459   | 5.82862  | 26.617  | 11.8505 | 223.478  | 73.9902 |
| AAEL013191 | conserved hypothetical protein | 7.90925  | 12.6495  | 8.52089  | 15.5226  | 12.7595 | 12.3908 | 5.02309  | 10.6017 |
| AAEL013255 | conserved hypothetical protein | 30.4197  | 32.371   | 37.9331  | 40.1855  | 35.8115 | 36.655  | 92.8783  | 47.1699 |
| AAEL013288 | conserved hypothetical protein | 73.4185  | 73.1111  | 98.64    | 94.8323  | 64.4209 | 62.3927 | 0.845475 | 37.2807 |
| AAEL013291 | conserved hypothetical protein | 24.4315  | 21.98    | 32.1448  | 27.1882  | 12.1419 | 12.163  | 4.15496  | 13.2841 |
| AAEL013295 | conserved hypothetical protein | 70.014   | 70.4657  | 54.4033  | 65.6007  | 60.5145 | 63.9398 | 2.03002  | 46.0885 |
| AAEL013336 | conserved hypothetical protein | 5.15291  | 3.94914  | 5.60646  | 16.966   | 7.06825 | 8.61878 | 19.8077  | 14.584  |
| AAEL013533 | conserved hypothetical protein | 1323.7   | 1357.74  | 656.875  | 590.468  | 4431.85 | 4602.88 | 2539.3   | 1905.23 |
| AAEL013584 | conserved hypothetical protein | 2.88344  | 3.06426  | 1.01457  | 0.711505 | 1.50433 | 1.45928 | 12211.4  | 6781.29 |
| AAEL013590 | conserved hypothetical protein | 19.1694  | 17.9013  | 24.4683  | 23.3825  | 22.9406 | 26.3249 | 5.09249  | 13.0089 |
| AAEL013774 | conserved hypothetical protein | 1.53228  | 1.07915  | 1.0249   | 1.05644  | 18.8657 | 9.4383  | 4036.06  | 1851.69 |
| AAEL013857 | conserved hypothetical protein | 413.346  | 599.109  | 1.32696  | 1.57818  | 21.8398 | 23.0199 | 10.1914  | 244.97  |
| AAEL013885 | conserved hypothetical protein | 3.05263  | 3.15504  | 2.35151  | 1.69833  | 6.10528 | 20.7295 | 10584.9  | 3506.08 |
| AAEL013889 | conserved hypothetical protein | 7.80042  | 8.21395  | 12.5266  | 14.2198  | 6.06173 | 4.54788 | 84.0148  | 36.7642 |
| AAEL014283 | conserved hypothetical protein | 26.0143  | 24.2707  | 34.3777  | 35.3879  | 13.9314 | 12.2418 | 7.27542  | 13.2141 |
| AAEL014484 | conserved hypothetical protein | 64.5035  | 55.9703  | 52.423   | 55.2726  | 45.7756 | 52.0452 | 285.651  | 169.056 |

|            |                                |          |          |          |          |          |          |          |          |
|------------|--------------------------------|----------|----------|----------|----------|----------|----------|----------|----------|
| AAEL014633 | conserved hypothetical protein | 16.1584  | 15.5248  | 21.4105  | 20.1144  | 16.8264  | 16.092   | 1.09953  | 9.01691  |
| AAEL014874 | conserved hypothetical protein | 0        | 0        | 10.4069  | 37.9549  | 0        | 0.071301 | 0        | 0        |
| AAEL014896 | conserved hypothetical protein | 0.359451 | 0.37252  | 0.258427 | 0.257016 | 0.766284 | 1.03884  | 103.19   | 38.8618  |
| AAEL015256 | conserved hypothetical protein | 15.9926  | 24.9059  | 67.6264  | 73.8019  | 28.2423  | 16.9668  | 23.6537  | 83.7999  |
| AAEL015543 | conserved hypothetical protein | 25.1897  | 28.993   | 39.3108  | 28.9279  | 27.5104  | 28.7214  | 5.56201  | 18.9489  |
| AAEL015593 | conserved hypothetical protein | 1.29065  | 1.00554  | 1.71908  | 1.69288  | 1.80423  | 1.773    | 47.1698  | 17.55    |
| AAEL003513 | conserved hypothetical protein | 0.152159 | 0.065121 | 83.7279  | 570.743  | 0        | 0        | 0        | 0.319099 |
| AAEL010240 | conserved hypothetical protein | 46.3286  | 47.8987  | 20.6498  | 23.4891  | 69.5674  | 63.8842  | 0.348877 | 19.0058  |
| AAEL010808 | conserved hypothetical protein | 11.6344  | 8.34314  | 16.5873  | 15.9433  | 4.74753  | 5.2392   | 0.510549 | 7.52435  |
| AAEL013719 | conserved hypothetical protein | 0.064987 | 0        | 0.049115 | 31.919   | 0        | 0        | 0        | 0        |
| AAEL009636 | conserved hypothetical protein | 181.08   | 180.442  | 34.7363  | 37.4002  | 31.0224  | 31.437   | 31.6679  | 94.045   |
| AAEL002333 | conserved hypothetical protein | 0        | 0        | 0.049645 | 50.5497  | 0.061683 | 0        | 0        | 0.11415  |
| AAEL014943 | conserved hypothetical protein | 190.985  | 216.308  | 251.603  | 183.081  | 206.376  | 199.259  | 141.531  | 154.366  |
| AAEL004734 | conserved hypothetical protein | 25.0429  | 24.3104  | 40.4488  | 39.661   | 26.4183  | 26.879   | 5.97337  | 15.1417  |
| AAEL005016 | conserved hypothetical protein | 16.1332  | 17.2986  | 15.8328  | 14.6213  | 11.2304  | 11.6798  | 5.98849  | 12.3117  |
| AAEL007562 | conserved hypothetical protein | 31.7311  | 32.7077  | 104.764  | 85.3249  | 18.5026  | 19.7027  | 1.16066  | 15.921   |
| AAEL003654 | conserved hypothetical protein | 19.9952  | 20.6944  | 12.4537  | 12.7845  | 23.7776  | 23.2415  | 2.61605  | 11.5972  |
| AAEL012737 | conserved hypothetical protein | 42.4309  | 36.0172  | 51.4966  | 40.2486  | 57.2374  | 51.2228  | 14.5561  | 23.7325  |
| AAEL013720 | conserved hypothetical protein | 0        | 0        | 0.057893 | 26.903   | 0        | 0        | 0        | 0        |
| AAEL003355 | conserved hypothetical protein | 61.3177  | 56.4718  | 47.7507  | 60.3471  | 22.7357  | 23.7092  | 2.24633  | 39.5132  |
| AAEL009263 | conserved hypothetical protein | 80.3659  | 56.1607  | 276.817  | 218.781  | 14.0622  | 17.4277  | 1.20887  | 27.7943  |
| AAEL013577 | conserved hypothetical protein | 9.02348  | 7.61707  | 5.75443  | 4.83429  | 5.57541  | 6.06135  | 26663.2  | 15568.5  |
| AAEL012646 | conserved hypothetical protein | 1.3189   | 0        | 0.326688 | 0.196929 | 0        | 0.514811 | 7.0388   | 0.193081 |
| AAEL009280 | conserved hypothetical protein | 25.8602  | 25.1886  | 36.1954  | 35.2386  | 16.8685  | 16.5991  | 11.428   | 19.0794  |
| AAEL007259 | conserved hypothetical protein | 28.4522  | 34.2061  | 24.2741  | 21.2973  | 21.035   | 22.8628  | 15.5361  | 22.3079  |
| AAEL004049 | conserved hypothetical protein | 13.2068  | 11.5787  | 9.66414  | 9.77457  | 11.0064  | 10.2695  | 0.462825 | 5.13369  |
| AAEL009639 | conserved hypothetical protein | 26.9526  | 29.0685  | 42.4113  | 35.3391  | 31.4757  | 28.9828  | 9.69202  | 16.5224  |
| AAEL000408 | conserved hypothetical protein | 20.2675  | 18.3705  | 22.04    | 20.2271  | 26.2864  | 30.0328  | 4.17945  | 10.6297  |
| AAEL004438 | conserved hypothetical protein | 73.8875  | 75.6538  | 108.097  | 77.5255  | 80.5452  | 86.5854  | 42.9603  | 47.241   |
| AAEL001955 | conserved hypothetical protein | 38.1425  | 33.4939  | 30.5351  | 29.7306  | 26.2454  | 26.4971  | 19.0936  | 28.4654  |
| AAEL012372 | conserved hypothetical protein | 12.1777  | 13.4793  | 15.1599  | 12.4654  | 12.6864  | 14.3288  | 2.3826   | 7.02878  |
| AAEL001326 | conserved hypothetical protein | 1.2566   | 1.1389   | 2.96896  | 13.9601  | 3.21164  | 3.43626  | 3.40656  | 1.52042  |
| AAEL001448 | conserved hypothetical protein | 56.9907  | 56.5354  | 41.1418  | 46.2977  | 40.0864  | 40.075   | 30.0263  | 44.0569  |
| AAEL008449 | conserved hypothetical protein | 122.331  | 85.8079  | 0.516245 | 0.453639 | 0.727962 | 0.681366 | 1.45494  | 47.7048  |
| AAEL008801 | conserved hypothetical protein | 2.32926  | 3.96397  | 3.54654  | 2.36665  | 11.9602  | 8.03758  | 1898.77  | 593.79   |

|            |                                |          |          |          |          |          |          |          |          |
|------------|--------------------------------|----------|----------|----------|----------|----------|----------|----------|----------|
| AAEL013905 | conserved hypothetical protein | 34.4525  | 32.2985  | 33.3077  | 39.1109  | 20.7683  | 22.0113  | 7.0453   | 20.6709  |
| AAEL009778 | conserved hypothetical protein | 4.90106  | 10.1835  | 7.52852  | 9.73657  | 6.3773   | 9.69228  | 0.886019 | 12.7263  |
| AAEL008485 | conserved hypothetical protein | 152.35   | 123.668  | 22.449   | 22.2731  | 23.0731  | 19.9967  | 4.76773  | 39.1745  |
| AAEL007478 | conserved hypothetical protein | 1.191    | 1.76258  | 3.91526  | 2.91142  | 3.3154   | 2.49788  | 291.488  | 129.973  |
| AAEL008942 | conserved hypothetical protein | 17.0356  | 18.1909  | 17.7372  | 16.7361  | 28.5288  | 24.861   | 4.0513   | 13.8698  |
| AAEL007381 | conserved hypothetical protein | 16.7684  | 18.7699  | 25.4292  | 24.2751  | 56.2568  | 51.8916  | 1.306    | 9.52048  |
| AAEL009397 | conserved hypothetical protein | 17.5888  | 19.0563  | 20.8609  | 17.9774  | 17.5958  | 18.7417  | 3.38979  | 11.6336  |
| AAEL009611 | conserved hypothetical protein | 14.664   | 13.4122  | 18.0386  | 16.792   | 13.512   | 12.7953  | 4.77183  | 12.8361  |
| AAEL008640 | conserved hypothetical protein | 0        | 0.091579 | 3.94808  | 34.2137  | 0.069608 | 0        | 0        | 0.130733 |
| AAEL007236 | conserved hypothetical protein | 301.194  | 297.171  | 454.873  | 408.438  | 153.465  | 157.373  | 15.4571  | 158.664  |
| AAEL002366 | conserved hypothetical protein | 17.1697  | 15.4402  | 23.738   | 23.1553  | 13.1145  | 12.6993  | 4.05228  | 9.27315  |
| AAEL001029 | conserved hypothetical protein | 23.6088  | 26.4311  | 20.8537  | 20.6989  | 26.2452  | 28.426   | 5.32356  | 14.6246  |
| AAEL001897 | conserved hypothetical protein | 9.36008  | 10.1548  | 6.37216  | 8.28383  | 11.3845  | 9.36488  | 0.644223 | 6.61558  |
| AAEL011588 | conserved hypothetical protein | 0.428238 | 0.071575 | 0.315364 | 0.129643 | 2.04     | 2.32588  | 974.806  | 439.774  |
| AAEL006886 | conserved hypothetical protein | 0.482292 | 0.589609 | 0.178846 | 0.388473 | 20.6602  | 1.20825  | 18.0685  | 6.73013  |
| AAEL008059 | conserved hypothetical protein | 3.55859  | 2.02111  | 0        | 0        | 0        | 5.54345  | 8.43125  | 6.73758  |
| AAEL006007 | conserved hypothetical protein | 3.80429  | 10.6956  | 12.7895  | 9.8648   | 75.4045  | 115.658  | 31852.1  | 14523.6  |
| AAEL003483 | conserved hypothetical protein | 22.8438  | 43.1175  | 49.6241  | 43.1029  | 191.393  | 162.686  | 6.19435  | 14.2934  |
| AAEL004455 | conserved hypothetical protein | 21.9911  | 20.0021  | 25.3118  | 20.2005  | 29.6926  | 28.8216  | 4.40589  | 12.9922  |
| AAEL005669 | conserved hypothetical protein | 0.262389 | 0.297575 | 0.248725 | 0.239432 | 1.0269   | 0.761057 | 253.609  | 117.102  |
| AAEL012012 | conserved hypothetical protein | 8.27242  | 7.89152  | 5.66163  | 8.81283  | 11.5726  | 10.8425  | 112.331  | 55.2469  |
| AAEL012502 | conserved hypothetical protein | 22.7065  | 21.0683  | 24.1601  | 20.0192  | 25.6019  | 27.1843  | 474.6    | 253.892  |
| AAEL006350 | conserved hypothetical protein | 13.4937  | 12.4302  | 17.8824  | 15.8926  | 14.3986  | 15.0947  | 0.113382 | 6.87393  |
| AAEL001153 | conserved hypothetical protein | 0.054569 | 0        | 0.787717 | 54.0865  | 0.196667 | 0.053725 | 0.250481 | 0        |
| AAEL010786 | conserved hypothetical protein | 11.3258  | 11.7682  | 6.42209  | 5.92579  | 21.7339  | 19.6582  | 0.14153  | 6.31518  |
| AAEL005528 | conserved hypothetical protein | 103.47   | 105.751  | 94.3933  | 94.7433  | 130.329  | 131.572  | 50.9958  | 69.3433  |
| AAEL004302 | conserved hypothetical protein | 16.5245  | 14.8636  | 25.3146  | 24.1982  | 9.23233  | 9.22064  | 0.462721 | 7.97704  |
| AAEL010799 | conserved hypothetical protein | 0.39883  | 0        | 0.680349 | 1.13884  | 3.04507  | 2.87869  | 422.52   | 199.593  |
| AAEL008153 | conserved hypothetical protein | 14.0137  | 14.7134  | 6.56097  | 5.98784  | 38.9673  | 39.7711  | 66.6404  | 30.291   |
| AAEL007757 | conserved hypothetical protein | 7.12218  | 6.59396  | 13.5593  | 11.2298  | 3.05844  | 3.65807  | 0.779867 | 4.36409  |
| AAEL012644 | conserved hypothetical protein | 4.80774  | 0.078204 | 3.45227  | 2.7626   | 0.67491  | 22.2353  | 9.67973  | 0.117824 |
| AAEL009428 | conserved hypothetical protein | 26.4544  | 30.046   | 45.4848  | 43.1397  | 30.7444  | 32.9297  | 8.91667  | 16.7773  |
| AAEL011190 | conserved hypothetical protein | 5.75578  | 5.53646  | 7.07346  | 9.6399   | 4.38983  | 5.77808  | 1.76898  | 8.25904  |
| AAEL005216 | conserved hypothetical protein | 56.9009  | 64.1859  | 90.7109  | 82.8826  | 56.5399  | 61.0512  | 10.4719  | 24.9339  |
| AAEL006892 | conserved hypothetical protein | 16.8372  | 15.733   | 30.8104  | 9.81024  | 17.7679  | 17.7012  | 0.379666 | 10.0906  |

|            |                                |          |          |          |          |          |          |          |          |
|------------|--------------------------------|----------|----------|----------|----------|----------|----------|----------|----------|
| AAEL002457 | conserved hypothetical protein | 1.61827  | 1.02408  | 2.10352  | 2.0851   | 3.23931  | 6.44672  | 299.747  | 141.825  |
| AAEL002921 | conserved hypothetical protein | 11.4082  | 10.3678  | 12.7899  | 14.0005  | 13.8493  | 16.1304  | 1.69657  | 6.97438  |
| AAEL010775 | conserved hypothetical protein | 1.21618  | 0.74481  | 0.561461 | 0.323415 | 0.203291 | 0.143714 | 343.634  | 130.033  |
| AAEL009862 | conserved hypothetical protein | 0.394821 | 0.27806  | 0.329365 | 0.104842 | 0.899068 | 0.860654 | 355.636  | 183.615  |
| AAEL005102 | conserved hypothetical protein | 27.5074  | 25.98    | 9.14937  | 11.623   | 14.1097  | 16.7415  | 200.696  | 105.749  |
| AAEL009194 | conserved hypothetical protein | 0.456506 | 0.651035 | 25.7393  | 100.372  | 1.6684   | 0.973642 | 0        | 0.305368 |
| AAEL002983 | conserved hypothetical protein | 40.5123  | 39.5164  | 30.2567  | 35.95    | 51.795   | 49.1936  | 22.4178  | 30.463   |
| AAEL009879 | conserved hypothetical protein | 47.4015  | 49.4238  | 34.227   | 40.166   | 34.3365  | 34.2053  | 17.6816  | 35.3196  |
| AAEL001875 | conserved hypothetical protein | 21.1797  | 21.1353  | 24.4166  | 24.8501  | 14.6926  | 16.3905  | 2.78303  | 10.9761  |
| AAEL011832 | conserved hypothetical protein | 113.662  | 113.095  | 138.834  | 124.774  | 121.261  | 124.492  | 47.3717  | 91.7742  |
| AAEL007444 | conserved hypothetical protein | 70.035   | 68.6163  | 60.6676  | 95.1544  | 233.67   | 221.513  | 192.397  | 114.362  |
| AAEL008723 | conserved hypothetical protein | 70.7859  | 74.6159  | 74.1017  | 64.239   | 70.935   | 71.7999  | 832.173  | 397.654  |
| AAEL001358 | conserved hypothetical protein | 18.9132  | 17.341   | 32.3191  | 29.8367  | 9.54242  | 12.8843  | 3.133    | 9.9316   |
| AAEL000948 | conserved hypothetical protein | 0.334842 | 0.465987 | 0.879943 | 0.522938 | 10.7809  | 5.07702  | 759.469  | 273.428  |
| AAEL013025 | conserved hypothetical protein | 25.6214  | 27.1558  | 19.9134  | 19.5458  | 40.6941  | 39.9546  | 0.365767 | 15.1103  |
| AAEL001487 | conserved hypothetical protein | 0        | 0        | 0.051481 | 66.0139  | 0.062821 | 0        | 0        | 0        |
| AAEL012176 | conserved hypothetical protein | 14.2049  | 15.6838  | 20.614   | 16.9801  | 15.8421  | 17.2714  | 2.76081  | 8.97322  |
| AAEL005428 | conserved hypothetical protein | 0.565995 | 0.190829 | 0.427958 | 0.563574 | 15.1219  | 3.72253  | 603.75   | 234.767  |
| AAEL009399 | conserved hypothetical protein | 17.7086  | 19.0827  | 21.9265  | 20.5512  | 15.4884  | 17.9773  | 3.85878  | 13.4425  |
| AAEL008039 | conserved hypothetical protein | 7.65522  | 4.84817  | 7.40293  | 7.76839  | 36.5927  | 24.1557  | 1230.18  | 452.974  |
| AAEL012725 | conserved hypothetical protein | 19.22    | 18.0172  | 15.2402  | 22.0749  | 15.2393  | 15.4677  | 1.52967  | 11.0577  |
| AAEL011088 | conserved hypothetical protein | 4.77229  | 4.95013  | 39.9254  | 24.1897  | 6.60435  | 6.97027  | 68.7539  | 33.4104  |
| AAEL007920 | conserved hypothetical protein | 27.3519  | 28.7734  | 42.9039  | 38.7846  | 29.5911  | 25.0599  | 209.886  | 96.077   |
| AAEL007591 | conserved hypothetical protein | 0.153753 | 0.68875  | 0.20697  | 0        | 1.11651  | 0.76989  | 2707.99  | 983.005  |
| AAEL011701 | conserved hypothetical protein | 16.3215  | 15.4516  | 22.8086  | 20.241   | 13.6386  | 14.8643  | 5.17855  | 11.3209  |
| AAEL000200 | conserved hypothetical protein | 127.65   | 142.556  | 56.0788  | 55.5962  | 460.098  | 492.844  | 9.35507  | 53.1509  |
| AAEL005401 | conserved hypothetical protein | 40.4921  | 38.1039  | 36.5504  | 51.7699  | 72.8944  | 77.9157  | 5292.83  | 2610.36  |
| AAEL001156 | conserved hypothetical protein | 31.0544  | 30.2208  | 28.4204  | 24.2542  | 23.2124  | 26.4295  | 14.7396  | 21.4601  |
| AAEL007059 | conserved hypothetical protein | 18.5848  | 24.478   | 4.84971  | 4.75944  | 7.38239  | 11.031   | 198.449  | 108.198  |
| AAEL008953 | conserved hypothetical protein | 13.7723  | 14.1903  | 34.4389  | 24.0505  | 71.3743  | 22.4094  | 157.075  | 57.3169  |
| AAEL012964 | conserved hypothetical protein | 226.935  | 226.455  | 165.152  | 207.243  | 282.609  | 287.884  | 174.733  | 196.306  |
| AAEL002891 | conserved hypothetical protein | 64.8531  | 64.5632  | 84.0188  | 76.9576  | 31.1078  | 32.2312  | 9.04188  | 36.4445  |
| AAEL007399 | conserved hypothetical protein | 17.7806  | 18.2076  | 22.0932  | 22.1783  | 21.4466  | 23.2322  | 1.42097  | 10.5085  |
| AAEL005593 | conserved hypothetical protein | 19.4296  | 16.6969  | 70.8981  | 38.2011  | 171.759  | 164.216  | 13.071   | 11.3518  |
| AAEL009492 | conserved hypothetical protein | 5.0925   | 5.73723  | 6.46227  | 7.72284  | 10.1858  | 8.67959  | 199.227  | 87.6258  |

|            |                                |          |          |          |          |          |          |          |          |
|------------|--------------------------------|----------|----------|----------|----------|----------|----------|----------|----------|
| AAEL005091 | conserved hypothetical protein | 2.10969  | 2.16514  | 1.23996  | 1.61925  | 1.36248  | 1.08016  | 45.9008  | 20.2108  |
| AAEL010931 | conserved hypothetical protein | 55.8177  | 59.0426  | 114.3    | 32.4891  | 46.7762  | 48.3376  | 141.47   | 95.3415  |
| AAEL005452 | conserved hypothetical protein | 9.26014  | 9.56152  | 20.9851  | 18.9381  | 11.4184  | 11.6285  | 1.11754  | 6.19173  |
| AAEL007156 | conserved hypothetical protein | 21.1313  | 19.4004  | 8.04259  | 8.27014  | 14.8328  | 13.9159  | 3.81832  | 10.9704  |
| AAEL002843 | conserved hypothetical protein | 64.6457  | 64.0209  | 90.026   | 85.5073  | 28.8795  | 29.8794  | 2.90499  | 34.8781  |
| AAEL014147 | conserved hypothetical protein | 12.5626  | 10.6716  | 12.0085  | 12.4955  | 12.9305  | 13.4893  | 2.94693  | 8.08421  |
| AAEL012489 | conserved hypothetical protein | 19.7588  | 18.9476  | 19.0326  | 20.0193  | 20.586   | 21.9315  | 3.61268  | 10.4639  |
| AAEL005432 | conserved hypothetical protein | 0.425988 | 0.212212 | 0.550283 | 0.337672 | 10.9996  | 6.62976  | 1065.38  | 333.957  |
| AAEL008724 | conserved hypothetical protein | 18.942   | 18.4963  | 29.772   | 26.9007  | 9.31737  | 8.21714  | 1.81025  | 10.3621  |
| AAEL004509 | conserved hypothetical protein | 0.646783 | 0.594846 | 4.86065  | 2.22683  | 2.78183  | 2.65217  | 59.4168  | 22.7903  |
| AAEL006990 | conserved hypothetical protein | 3.18157  | 2.63715  | 1.94349  | 1.5026   | 3.19867  | 3.89693  | 266.314  | 128.565  |
| AAEL000226 | conserved hypothetical protein | 37.1466  | 34.0909  | 41.4514  | 38.2928  | 38.6553  | 39.3459  | 19.6622  | 28.7776  |
| AAEL013503 | conserved hypothetical protein | 8.87533  | 8.41582  | 6.44091  | 6.44386  | 5.64672  | 6.19     | 2.1813   | 7.91456  |
| AAEL000294 | conserved hypothetical protein | 2.64689  | 3.25753  | 4.07714  | 3.62843  | 27.795   | 21.7676  | 157.276  | 65.694   |
| AAEL000350 | conserved hypothetical protein | 0.435361 | 0.130865 | 398.027  | 819.894  | 0.174473 | 0.456033 | 0.062301 | 0.212337 |
| AAEL000362 | conserved hypothetical protein | 1.2339   | 1.40523  | 1.35073  | 0.969024 | 2.75502  | 3.03788  | 63.8283  | 23.1072  |
| AAEL000461 | conserved hypothetical protein | 26.3957  | 32.1497  | 38.9117  | 46.7611  | 32.2868  | 32.1913  | 113.445  | 59.2642  |
| AAEL000570 | conserved hypothetical protein | 72.4284  | 64.3917  | 50.5121  | 49.5641  | 73.2822  | 50.3641  | 59.8951  | 92.5567  |
| AAEL000658 | conserved hypothetical protein | 4.17245  | 3.84352  | 2.26862  | 2.49721  | 3.84445  | 3.98816  | 76.2236  | 30.8853  |
| AAEL000699 | conserved hypothetical protein | 7.85444  | 7.66487  | 10.3667  | 8.77339  | 10.8383  | 12.3148  | 1.70587  | 6.06046  |
| AAEL000796 | conserved hypothetical protein | 0.556902 | 0.527143 | 283.519  | 1758.35  | 0.56685  | 0.662389 | 0.879771 | 0.938442 |
| AAEL000868 | conserved hypothetical protein | 12.4701  | 11.5351  | 21.7307  | 20.312   | 7.92116  | 9.72276  | 1.30526  | 6.65509  |
| AAEL000996 | conserved hypothetical protein | 18.3976  | 20.6741  | 17.4619  | 15.7157  | 28.8362  | 29.9243  | 7.51248  | 14.4604  |
| AAEL001004 | conserved hypothetical protein | 75.1572  | 72.5028  | 128.083  | 120.053  | 56.6553  | 53.3767  | 28.0812  | 53.15    |
| AAEL001264 | conserved hypothetical protein | 76.4135  | 78.1826  | 112.772  | 92.1457  | 69.0769  | 76.0462  | 173.904  | 97.5348  |
| AAEL001390 | conserved hypothetical protein | 28.5806  | 38.4448  | 19.4499  | 17.0167  | 26.6265  | 34.9628  | 0.28488  | 10.7685  |
| AAEL001476 | conserved hypothetical protein | 16.3148  | 18.9103  | 9.97555  | 10.0514  | 22.8602  | 22.7     | 13.6281  | 23.5927  |
| AAEL001520 | conserved hypothetical protein | 43.4515  | 41.4812  | 69.6254  | 62.5124  | 38.2571  | 38.3243  | 11.9255  | 22.5494  |
| AAEL001559 | conserved hypothetical protein | 29.7573  | 29.6102  | 8.40752  | 15.0127  | 10.1329  | 11.3557  | 0.156275 | 16.3738  |
| AAEL001639 | conserved hypothetical protein | 0.553178 | 0.544446 | 3.48581  | 20.6479  | 0.988926 | 0.918725 | 0.575091 | 0.48324  |
| AAEL001666 | conserved hypothetical protein | 159.673  | 153.995  | 374.152  | 396.651  | 49.6489  | 47.7713  | 1.83107  | 80.514   |
| AAEL001793 | conserved hypothetical protein | 105.144  | 136.863  | 25.9273  | 21.0288  | 27.2813  | 24.3792  | 4.15775  | 89.9751  |
| AAEL001913 | conserved hypothetical protein | 152.552  | 140.456  | 230.934  | 308.287  | 82.4552  | 81.0557  | 469.356  | 281.901  |
| AAEL002142 | conserved hypothetical protein | 64.0921  | 60.8054  | 94.3612  | 60.2797  | 37.3692  | 39.6361  | 6.35076  | 23.8315  |
| AAEL002163 | conserved hypothetical protein | 30.0808  | 29.8214  | 49.1329  | 65.9561  | 32.2009  | 28.3485  | 209.892  | 86.3093  |



|            |                                |          |          |          |          |          |          |          |          |
|------------|--------------------------------|----------|----------|----------|----------|----------|----------|----------|----------|
| AAEL002186 | conserved hypothetical protein | 31.8179  | 30.0254  | 33.1988  | 32.9342  | 30.0006  | 30.5629  | 9.13586  | 17.7131  |
| AAEL002232 | conserved hypothetical protein | 19.1301  | 22.1164  | 24.5671  | 20.9595  | 25.7622  | 28.6122  | 2.53383  | 10.5127  |
| AAEL002267 | conserved hypothetical protein | 0.079664 | 0.141434 | 0.433274 | 0.268118 | 2.97091  | 3.71759  | 761.233  | 309.059  |
| AAEL002411 | conserved hypothetical protein | 79.7268  | 74.1276  | 115.123  | 104.291  | 72.8896  | 73.9304  | 561.072  | 327.639  |
| AAEL002432 | conserved hypothetical protein | 0.02348  | 0.055201 | 0.035485 | 0        | 0.042363 | 0.022942 | 223.893  | 115.348  |
| AAEL002495 | conserved hypothetical protein | 1.35477  | 0.992537 | 4.93101  | 3.17131  | 129.669  | 116.363  | 8075.6   | 3393.82  |
| AAEL002529 | conserved hypothetical protein | 12.3375  | 14.8964  | 24.0217  | 20.9321  | 14.3665  | 13.5785  | 7.11659  | 12.972   |
| AAEL002791 | conserved hypothetical protein | 27.0729  | 23.3542  | 28.9678  | 21.1648  | 26.0613  | 27.4185  | 76.5147  | 38.1951  |
| AAEL002815 | conserved hypothetical protein | 300.444  | 344.157  | 7.39428  | 7.57111  | 22.2371  | 21.1601  | 18.9053  | 132.247  |
| AAEL002890 | conserved hypothetical protein | 2.15799  | 9.87629  | 1.03604  | 1.09292  | 4.78175  | 3.7069   | 1.43957  | 4.32925  |
| AAEL002900 | conserved hypothetical protein | 40.0913  | 38.7586  | 37.1141  | 38.6889  | 59.7653  | 57.4063  | 222.146  | 98.2008  |
| AAEL002905 | conserved hypothetical protein | 34.82    | 33.7892  | 42.7275  | 46.7014  | 24.029   | 25.3056  | 14.9926  | 27.5153  |
| AAEL003086 | conserved hypothetical protein | 65.7263  | 63.2734  | 131.734  | 123.548  | 50.6161  | 54.5026  | 528.324  | 331.84   |
| AAEL003114 | conserved hypothetical protein | 13.2254  | 7.45286  | 8.9703   | 12.8351  | 21.1689  | 17.9571  | 171.066  | 54.0776  |
| AAEL003525 | conserved hypothetical protein | 10.2354  | 9.35963  | 58.6764  | 406.147  | 11.3814  | 11.4501  | 7.28045  | 6.47382  |
| AAEL003600 | conserved hypothetical protein | 0.071292 | 0        | 0.051055 | 0.088173 | 0        | 0.142602 | 5.74653  | 0.311549 |
| AAEL003949 | conserved hypothetical protein | 16.3051  | 18.1319  | 17.7321  | 13.8792  | 25.2081  | 25.9337  | 3.4145   | 10.0115  |
| AAEL003957 | conserved hypothetical protein | 254.985  | 262.313  | 224.014  | 208.564  | 192.473  | 187.649  | 1075.92  | 565.79   |
| AAEL003992 | conserved hypothetical protein | 18.9892  | 20.606   | 23.7043  | 20.6934  | 18.0408  | 18.3332  | 7.75479  | 15.7223  |
| AAEL004277 | conserved hypothetical protein | 0.179732 | 0.1569   | 0.132774 | 0.268872 | 0.522958 | 0.17468  | 47.9981  | 16.9049  |
| AAEL004422 | conserved hypothetical protein | 16.1963  | 16.9899  | 12.7303  | 14.5611  | 18.5432  | 21.1396  | 3.15285  | 9.01512  |
| AAEL004439 | conserved hypothetical protein | 25.457   | 24.3685  | 45.86    | 37.0587  | 24.8926  | 24.8268  | 2.8303   | 15.0902  |
| AAEL004490 | conserved hypothetical protein | 44.3299  | 44.6187  | 60.2102  | 60.0064  | 35.1406  | 35.5926  | 22.9563  | 32.0641  |
| AAEL004516 | conserved hypothetical protein | 0        | 0        | 0.305211 | 14.6533  | 0        | 0        | 0.192581 | 0        |
| AAEL004553 | conserved hypothetical protein | 5.16406  | 5.81657  | 7.52696  | 3.68473  | 9.43526  | 10.4236  | 162.646  | 67.157   |
| AAEL004657 | conserved hypothetical protein | 62.1272  | 58.9318  | 41.9424  | 50.4189  | 39.2763  | 39.9472  | 231.496  | 116.341  |
| AAEL004665 | conserved hypothetical protein | 0        | 0.107244 | 0.068617 | 0.158149 | 0.08363  | 0        | 90.9727  | 38.7692  |
| AAEL004817 | conserved hypothetical protein | 7.68728  | 5.93397  | 1.75787  | 3.93138  | 6.35759  | 6.5705   | 0.325996 | 3.5754   |
| AAEL004873 | conserved hypothetical protein | 66.1991  | 56.9677  | 530.96   | 832.326  | 35.4598  | 41.178   | 26.8707  | 38.3751  |
| AAEL004914 | conserved hypothetical protein | 76.559   | 90.0263  | 54.6668  | 50.8878  | 46.6431  | 47.1311  | 52.2585  | 64.5823  |
| AAEL005171 | conserved hypothetical protein | 33.9218  | 33.4382  | 9.49748  | 14.5836  | 20.8994  | 22.5281  | 16.6204  | 23.2347  |
| AAEL005288 | conserved hypothetical protein | 24.6347  | 21.1431  | 21.321   | 21.6631  | 9.53294  | 10.6762  | 0.192629 | 12.8135  |
| AAEL005395 | conserved hypothetical protein | 31.0124  | 29.3997  | 50.3031  | 49.4961  | 20.7573  | 23.3653  | 5.10408  | 19.0459  |
| AAEL005457 | conserved hypothetical protein | 103.949  | 145.718  | 39.3913  | 37.8235  | 47.5688  | 51.3852  | 103.314  | 113.946  |
| AAEL005465 | conserved hypothetical protein | 19.344   | 16.3221  | 20.5371  | 20.5026  | 19.3288  | 18.0764  | 3.93921  | 10.5348  |

|            |                                |          |          |         |         |          |          |          |          |
|------------|--------------------------------|----------|----------|---------|---------|----------|----------|----------|----------|
| AAEL005606 | conserved hypothetical protein | 11.2452  | 16.74    | 100.289 | 41.2622 | 17.1994  | 9.16256  | 3.57718  | 8.43654  |
| AAEL005777 | conserved hypothetical protein | 4.38652  | 5.43521  | 11.4766 | 8.54832 | 6.22236  | 6.13397  | 0.288265 | 4.43721  |
| AAEL005813 | conserved hypothetical protein | 33.9639  | 32.4386  | 31.1436 | 38.6375 | 31.8128  | 32.2932  | 13.5284  | 23.8193  |
| AAEL005884 | conserved hypothetical protein | 144.921  | 138.395  | 217.78  | 211.921 | 83.3673  | 89.7527  | 94.702   | 131.784  |
| AAEL006098 | conserved hypothetical protein | 14.733   | 13.7783  | 9.35152 | 10.1628 | 19.118   | 22.3088  | 71.6546  | 34.8983  |
| AAEL006336 | conserved hypothetical protein | 0.153232 | 0        | 2.00758 | 31.3761 | 0.161006 | 0.044068 | 0        | 0        |
| AAEL006570 | conserved hypothetical protein | 24.2214  | 24.1854  | 19.6764 | 21.0607 | 23.554   | 21.2415  | 2.54395  | 10.9389  |
| AAEL006701 | conserved hypothetical protein | 0.168249 | 0.68744  | 2.70523 | 2.02211 | 6.1165   | 1.94302  | 148.283  | 61.2624  |
| AAEL007043 | conserved hypothetical protein | 56.6502  | 58.6185  | 82.2798 | 59.2494 | 56.2311  | 58.376   | 62.1254  | 51.8637  |
| AAEL007058 | conserved hypothetical protein | 18.1336  | 15.4803  | 80.763  | 60.3368 | 15.5289  | 15.8368  | 1.55437  | 9.75479  |
| AAEL007084 | conserved hypothetical protein | 29.3157  | 29.9048  | 34.9857 | 29.3515 | 55.1582  | 52.3653  | 14.634   | 23.0225  |
| AAEL007339 | conserved hypothetical protein | 0.362303 | 0.249696 | 632.307 | 152.792 | 0.128624 | 0.41746  | 0.164385 | 0.733618 |
| AAEL007370 | conserved hypothetical protein | 54.9506  | 53.0006  | 58.4939 | 48.8654 | 43.6744  | 50.0578  | 29.2269  | 46.1984  |
| AAEL007592 | conserved hypothetical protein | 0        | 0.226894 | 0.20365 | 0       | 0.366142 | 1.01078  | 285.105  | 91.589   |
| AAEL007697 | conserved hypothetical protein | 17.0996  | 17.7909  | 19.6189 | 18.4653 | 19.6911  | 19.5571  | 4.83875  | 10.7134  |
| AAEL007701 | conserved hypothetical protein | 69.379   | 58.9149  | 75.2919 | 68.3976 | 45.7904  | 44.5808  | 14.916   | 36.6362  |
| AAEL007773 | conserved hypothetical protein | 15.5167  | 13.6518  | 7.71312 | 4.89161 | 18.6971  | 20.3063  | 47.8159  | 15.5265  |
| AAEL007780 | conserved hypothetical protein | 1.04202  | 0.13412  | 1.08845 | 1.17482 | 1.19199  | 5.66659  | 5.33993  | 0.383735 |
| AAEL008073 | conserved hypothetical protein | 53.3905  | 50.6606  | 60.5202 | 37.6706 | 92.0389  | 99.3701  | 112.114  | 69.4075  |
| AAEL008100 | conserved hypothetical protein | 38.2019  | 34.205   | 57.0939 | 51.991  | 28.0796  | 27.5131  | 18.8727  | 25.5638  |
| AAEL008157 | conserved hypothetical protein | 1.39572  | 1.11521  | 2.08364 | 2.13945 | 7.61894  | 3.35319  | 63.4616  | 21.7383  |
| AAEL008182 | conserved hypothetical protein | 73.2641  | 62.6771  | 387.832 | 322.461 | 36.7199  | 41.9601  | 1.71259  | 34.728   |
| AAEL008669 | conserved hypothetical protein | 0        | 0        | 1.15981 | 32.7662 | 0        | 0        | 0        | 0        |
| AAEL008829 | conserved hypothetical protein | 64.6692  | 65.3942  | 8.81938 | 22.3709 | 53.1489  | 52.0606  | 0.469994 | 24.5797  |
| AAEL008843 | conserved hypothetical protein | 124.561  | 121.587  | 59.4073 | 77.7547 | 95.0182  | 107.119  | 2.02386  | 52.0949  |
| AAEL008899 | conserved hypothetical protein | 28.9663  | 27.0264  | 32.0294 | 31.3954 | 30.6035  | 36.178   | 5.53018  | 11.0594  |
| AAEL009198 | conserved hypothetical protein | 20.5807  | 24.5764  | 19.3727 | 23.6791 | 25.5123  | 25.9219  | 294.468  | 140.498  |
| AAEL009235 | conserved hypothetical protein | 64.8729  | 63.8553  | 85.3797 | 76.1101 | 56.2571  | 58.8976  | 26.7423  | 40.5792  |
| AAEL009374 | conserved hypothetical protein | 10.1815  | 9.66889  | 10.0152 | 10.2761 | 7.8525   | 8.61652  | 4.74877  | 9.96264  |
| AAEL009401 | conserved hypothetical protein | 9.95814  | 10.221   | 3.58703 | 6.0159  | 14.2924  | 15.8812  | 0.864809 | 5.66559  |
| AAEL009483 | conserved hypothetical protein | 32.026   | 26.4617  | 35.4061 | 35.0148 | 40.2097  | 38.6847  | 186.064  | 82.2819  |
| AAEL009861 | conserved hypothetical protein | 43.4976  | 49.0728  | 29.6554 | 20.3679 | 305.819  | 256.88   | 30.6078  | 34.2328  |
| AAEL009899 | conserved hypothetical protein | 45.5101  | 48.4785  | 26.0268 | 36.5948 | 216.542  | 193.569  | 1.79653  | 17.5947  |
| AAEL009912 | conserved hypothetical protein | 15.8283  | 15.0077  | 18.8719 | 16.4365 | 32.7094  | 33.0501  | 4.12148  | 9.96071  |
| AAEL009955 | conserved hypothetical protein | 1074.05  | 1230.33  | 39.2121 | 13.4469 | 237.534  | 215.061  | 20.3196  | 515.964  |

|            |                                |          |          |          |          |          |          |          |          |
|------------|--------------------------------|----------|----------|----------|----------|----------|----------|----------|----------|
| AAELO10062 | conserved hypothetical protein | 1.58704  | 0.288419 | 25.039   | 13.1181  | 3.52702  | 2.97653  | 1.09748  | 0.584495 |
| AAELO10169 | conserved hypothetical protein | 2372.03  | 2491.55  | 1098.79  | 1025.49  | 6537.23  | 6764.12  | 2798.57  | 2423.58  |
| AAELO10249 | conserved hypothetical protein | 122.833  | 136.239  | 113.292  | 115.676  | 109.218  | 108.832  | 14.418   | 76.9743  |
| AAELO10311 | conserved hypothetical protein | 29.344   | 30.5274  | 26.7697  | 26.3017  | 19.9717  | 20.825   | 14.9904  | 22.1498  |
| AAELO10529 | conserved hypothetical protein | 42.2388  | 58.6533  | 31.8033  | 38.5851  | 5.89398  | 4.48795  | 1.25293  | 55.3559  |
| AAELO10687 | conserved hypothetical protein | 0.805907 | 0.469695 | 0.362607 | 0.34894  | 2.03549  | 1.17926  | 50.3745  | 19.2281  |
| AAELO10707 | conserved hypothetical protein | 0.038914 | 0        | 0.719423 | 53.5959  | 0.035971 | 0.039144 | 0.091698 | 0.06804  |
| AAELO10724 | conserved hypothetical protein | 19.2548  | 18.8506  | 54.4773  | 39.6041  | 50.1134  | 51.8119  | 256.015  | 128.757  |
| AAELO10845 | conserved hypothetical protein | 17.2864  | 15.506   | 27.03    | 29.175   | 17.5566  | 17.4288  | 3.33464  | 10.6253  |
| AAELO10920 | conserved hypothetical protein | 1.09345  | 2.3154   | 0.36334  | 0.170701 | 1.35587  | 1.96301  | 5285.42  | 2325.52  |
| AAELO10956 | conserved hypothetical protein | 2.0979   | 1.7489   | 27.3692  | 4.61521  | 6.94509  | 7.05771  | 5.16244  | 5.17611  |
| AAELO11180 | conserved hypothetical protein | 2.20289  | 2.308    | 2.59765  | 2.50215  | 59.2155  | 16.6367  | 3737.28  | 1219.67  |
| AAELO11438 | conserved hypothetical protein | 7.14195  | 8.95078  | 11.0278  | 9.66289  | 11.2016  | 10.3438  | 1.53322  | 6.8867   |
| AAELO11477 | conserved hypothetical protein | 9.36958  | 8.34115  | 6.09977  | 7.36121  | 10.0201  | 10.2052  | 1.0063   | 5.22743  |
| AAELO11628 | conserved hypothetical protein | 1.29235  | 2.33623  | 0.217677 | 0.810996 | 0.880725 | 2.5278   | 6.98621  | 0.880451 |
| AAELO11664 | conserved hypothetical protein | 16.4713  | 16.2706  | 26.9016  | 25.3488  | 11.6615  | 12.8895  | 1.6229   | 9.86238  |
| AAELO11851 | conserved hypothetical protein | 14.6979  | 15.9789  | 9.3184   | 9.82344  | 19.4047  | 20.4982  | 3.3131   | 8.82124  |
| AAELO11876 | conserved hypothetical protein | 28.3613  | 28.9182  | 20.9138  | 29.4983  | 27.3725  | 26.3876  | 10.392   | 18.8129  |
| AAELO11960 | conserved hypothetical protein | 24.5209  | 23.7115  | 21.8781  | 23.2126  | 37.969   | 36.7475  | 8.59202  | 15.4834  |
| AAELO12073 | conserved hypothetical protein | 8.86123  | 8.21216  | 13.7356  | 13.5614  | 8.99623  | 10.8833  | 2.18904  | 8.34851  |
| AAELO12302 | conserved hypothetical protein | 2.6401   | 2.63913  | 1.56838  | 1.96313  | 3.29145  | 3.45186  | 38.5541  | 13.2674  |
| AAELO12357 | conserved hypothetical protein | 103.383  | 107.682  | 29.9505  | 39.7012  | 139.206  | 111.461  | 1.34403  | 47.1554  |
| AAELO12427 | conserved hypothetical protein | 200.573  | 193      | 267.747  | 294.465  | 102.579  | 110.155  | 66.232   | 129.091  |
| AAELO12511 | conserved hypothetical protein | 109.583  | 137.988  | 40.9175  | 40.3096  | 39.3556  | 45.8275  | 113.067  | 118.834  |
| AAELO12610 | conserved hypothetical protein | 32.0479  | 36.5316  | 98.6244  | 61.8436  | 33.0866  | 32.5125  | 154.428  | 82.1357  |
| AAELO12618 | conserved hypothetical protein | 20.5723  | 20.9288  | 25.9805  | 19.9754  | 36.7211  | 34.8137  | 4.82161  | 11.4741  |
| AAELO12742 | conserved hypothetical protein | 52.968   | 48.842   | 23.757   | 21.2142  | 25.943   | 25.0251  | 44.4169  | 50.6231  |
| AAELO12747 | conserved hypothetical protein | 15.0639  | 14.6985  | 18.5417  | 17.8751  | 23.1015  | 21.2026  | 4.15743  | 10.8572  |
| AAELO12838 | conserved hypothetical protein | 2.81433  | 2.49656  | 3.26186  | 2.64993  | 1.00163  | 1.09436  | 0.615768 | 5.03816  |
| AAELO12859 | conserved hypothetical protein | 13.3605  | 9.1374   | 4.12915  | 4.26775  | 2.11909  | 2.12621  | 115.013  | 46.1076  |
| AAELO12866 | conserved hypothetical protein | 1.3376   | 1.77868  | 0.636153 | 0.930648 | 2.45346  | 1.96268  | 1220.83  | 538.64   |
| AAELO12891 | conserved hypothetical protein | 43.6504  | 26.2483  | 31.7548  | 32.4157  | 44.0905  | 48.6549  | 44.7479  | 32.7131  |
| AAELO12993 | conserved hypothetical protein | 19.0692  | 22.8868  | 25.7707  | 21.7795  | 23.9345  | 22.0844  | 7.99999  | 14.7436  |
| AAELO13075 | conserved hypothetical protein | 252.655  | 277.783  | 362.888  | 236.732  | 310.19   | 267.391  | 38.8356  | 142.383  |
| AAELO13110 | conserved hypothetical protein | 12.8985  | 14.2377  | 35.3479  | 21.5356  | 13.373   | 12.5224  | 0.54227  | 10.8802  |

|             |                                |          |          |          |          |          |          |          |         |
|-------------|--------------------------------|----------|----------|----------|----------|----------|----------|----------|---------|
| AAELO13118  | conserved hypothetical protein | 15.3067  | 26.4956  | 10.0646  | 9.80196  | 7.97806  | 9.61659  | 97017    | 53989.3 |
| AAELO13176  | conserved hypothetical protein | 61.7536  | 50.2883  | 74.4688  | 66.169   | 87.2365  | 88.5172  | 22.6707  | 43.9274 |
| AAELO13184  | conserved hypothetical protein | 0.68343  | 0.507688 | 6.20163  | 4.76444  | 0.896716 | 1.43195  | 59.1671  | 23.1503 |
| AAELO13262  | conserved hypothetical protein | 7.53352  | 13.8006  | 36.5345  | 18.34    | 8.00805  | 9.63715  | 13.5533  | 23.6103 |
| AAELO13304  | conserved hypothetical protein | 17.0351  | 27.9721  | 20.2586  | 40.3954  | 7.64894  | 7.31434  | 412.854  | 226.656 |
| AAELO13310  | conserved hypothetical protein | 32.0077  | 27.8009  | 25.2575  | 26.5191  | 25.2542  | 22.7217  | 7.93353  | 18.7583 |
| AAELO13429  | conserved hypothetical protein | 0.624177 | 0.450376 | 1.519    | 1.45207  | 0.968693 | 1.32215  | 41.8915  | 18.0629 |
| AAELO13524  | conserved hypothetical protein | 4.70339  | 3.46099  | 80.1777  | 233.604  | 3.14288  | 5.15026  | 1.63266  | 2.61229 |
| AAELO13615  | conserved hypothetical protein | 16.5985  | 14.742   | 11.2577  | 13.1264  | 11.2391  | 10.84    | 5.59384  | 11.2499 |
| AAELO13852  | conserved hypothetical protein | 21.3989  | 18.4685  | 52.8716  | 52.7179  | 9.12441  | 8.85217  | 0.49512  | 6.80064 |
| AAELO13965  | conserved hypothetical protein | 19.8281  | 20.545   | 19.1693  | 18.0215  | 21.6271  | 20.8316  | 6.39094  | 12.6009 |
| AAELO14132  | conserved hypothetical protein | 0        | 0        | 0.064715 | 0.042984 | 1.40637  | 0.489098 | 42.2492  | 9.99861 |
| AAELO14180  | conserved hypothetical protein | 26.0068  | 27.2217  | 12.2433  | 13.6495  | 38.6308  | 37.6981  | 0.30306  | 13.7546 |
| AAELO14274  | conserved hypothetical protein | 1.02563  | 0.983391 | 8.16792  | 26.4909  | 2.53108  | 2.09222  | 2.31348  | 1.76752 |
| AAELO14431  | conserved hypothetical protein | 0.094443 | 0.036827 | 0.790495 | 84.8415  | 0.078396 | 0        | 0        | 0       |
| AAELO14513  | conserved hypothetical protein | 13.3417  | 11.1244  | 15.9293  | 18.7288  | 22.2117  | 22.9137  | 5.83324  | 11.2657 |
| AAELO14657  | conserved hypothetical protein | 24.858   | 24.8123  | 37.371   | 25.2768  | 35.8033  | 35.6092  | 145.459  | 63.1849 |
| AAELO14825  | conserved hypothetical protein | 23.3878  | 18.7049  | 34.2339  | 28.9366  | 18.8441  | 17.3048  | 1.56503  | 10.5454 |
| AAELO14960  | conserved hypothetical protein | 12.9402  | 14.7381  | 11.9126  | 11.0953  | 12.5433  | 8.62136  | 71.1222  | 30.0057 |
| AAELO15064  | conserved hypothetical protein | 549.896  | 547.29   | 586.608  | 559.759  | 362.566  | 374.574  | 305.704  | 392.809 |
| AAELO00262  | conserved hypothetical protein | 64.611   | 63.4866  | 109.657  | 104.317  | 45.621   | 44.8571  | 15.68    | 39.7998 |
| AAELO11966  | conserved hypothetical protein | 15.3986  | 15.9936  | 11.5934  | 11.0866  | 20.1849  | 22.0973  | 0.59949  | 5.14927 |
| AAELO11862  | conserved hypothetical protein | 15.9166  | 16.4901  | 25.5203  | 24.0191  | 14.4919  | 13.6386  | 8.47604  | 14.3349 |
| AAELO005848 | conserved hypothetical protein | 24.7017  | 22.3843  | 32.0726  | 31.9798  | 21.6017  | 21.0203  | 8.8788   | 16.4454 |
| AAELO02446  | conserved hypothetical protein | 20.7479  | 20.1559  | 25.0034  | 21.7275  | 16.9139  | 15.4945  | 5.92437  | 15.8988 |
| AAELO005342 | conserved hypothetical protein | 17.3568  | 13.5686  | 9.42049  | 9.84251  | 10.2936  | 9.26283  | 90.4557  | 44.3359 |
| AAELO13300  | conserved hypothetical protein | 31.7826  | 33.6361  | 15.9542  | 17.9232  | 28.5168  | 31.1887  | 0.431533 | 20.496  |
| AAELO14194  | conserved hypothetical protein | 39.7002  | 34.9584  | 37.3449  | 42.0137  | 35.6037  | 37.1407  | 13.8547  | 27.3055 |
| AAELO00407  | conserved hypothetical protein | 44.6303  | 60.4747  | 46.6136  | 44.3384  | 43.2311  | 41.4135  | 41.566   | 66.8065 |
| AAELO001511 | conserved hypothetical protein | 160.423  | 169.6    | 302.843  | 193.506  | 114.006  | 114.315  | 17.5397  | 88.964  |
| AAELO13716  | conserved hypothetical protein | 79.785   | 77.3158  | 50.2901  | 48.165   | 55.7909  | 60.046   | 52.2725  | 57.8485 |
| AAELO001561 | conserved hypothetical protein | 22.1197  | 18.8183  | 16.1907  | 13.6361  | 29.9922  | 26.7168  | 109.216  | 51.0015 |
| AAELO004908 | conserved hypothetical protein | 0        | 0.083413 | 8.01264  | 61.2342  | 0.18457  | 0.142985 | 0        | 0       |
| AAELO003750 | conserved hypothetical protein | 649.814  | 657.685  | 518.223  | 536.296  | 1100.46  | 1097.39  | 151.778  | 368.205 |
| AAELO005843 | conserved hypothetical protein | 71.2375  | 66.8856  | 62.0049  | 64.8981  | 63.4537  | 0        | 32.4158  | 47.9056 |

|            |                                |          |          |          |          |          |          |          |          |
|------------|--------------------------------|----------|----------|----------|----------|----------|----------|----------|----------|
| AAEL000260 | conserved hypothetical protein | 14.8552  | 13.6559  | 22.4077  | 18.9118  | 16.4562  | 18.5299  | 1.43991  | 7.94785  |
| AAEL006940 | conserved hypothetical protein | 70.6509  | 66.132   | 78.1635  | 67.5898  | 67.385   | 69.1645  | 28.2704  | 46.884   |
| AAEL013197 | conserved hypothetical protein | 0.072686 | 0.168155 | 0.260533 | 0.242767 | 0.920618 | 0.214415 | 817.704  | 276.108  |
| AAEL014318 | conserved hypothetical protein | 24.5273  | 21.8296  | 158.163  | 664.064  | 22.2667  | 24.8771  | 8.86151  | 15.2707  |
| AAEL001085 | conserved hypothetical protein | 38.5867  | 37.3742  | 41.9776  | 33.9799  | 31.0697  | 38.2762  | 13.1015  | 47.0504  |
| AAEL001325 | conserved hypothetical protein | 11.2673  | 10.8352  | 21.469   | 25.1207  | 34.3554  | 28.9536  | 0.499239 | 5.10906  |
| AAEL009427 | conserved hypothetical protein | 53.1043  | 54.7476  | 48.0713  | 51.0458  | 48.9985  | 49.2157  | 9.95922  | 30.235   |
| AAEL013987 | conserved hypothetical protein | 152.778  | 137.455  | 126.441  | 243.125  | 118.469  | 60.9019  | 297.589  | 194.925  |
| AAEL000204 | conserved hypothetical protein | 27.5757  | 25.6621  | 36.2072  | 39.3731  | 26.5173  | 27.2677  | 170.898  | 88.6513  |
| AAEL003864 | conserved hypothetical protein | 29.0176  | 24.7248  | 29.1754  | 25.9687  | 45.7449  | 50.681   | 7.94868  | 17.7684  |
| AAEL012708 | conserved hypothetical protein | 19.331   | 19.5277  | 33.4202  | 32.4608  | 15.2075  | 16.4071  | 0.315357 | 10.8368  |
| AAEL011205 | conserved hypothetical protein | 37.4016  | 30.3266  | 27.9798  | 23.3595  | 19.6286  | 19.2872  | 2.2763   | 19.7304  |
| AAEL009165 | conserved hypothetical protein | 1.41651  | 2.85013  | 0.639139 | 0.738797 | 0.080378 | 1.4032   | 7076.4   | 4899.15  |
| AAEL001247 | conserved hypothetical protein | 77.2151  | 83.0291  | 109.786  | 86.6091  | 116.527  | 112.171  | 256.568  | 138.308  |
| AAEL010574 | conserved hypothetical protein | 85.4604  | 94.1587  | 66.8376  | 68.3332  | 77.7848  | 78.6909  | 80.6484  | 108.338  |
| AAEL004042 | conserved hypothetical protein | 80.5925  | 95.3488  | 38.7459  | 51.0984  | 49.6826  | 49.7346  | 52.5055  | 73.7695  |
| AAEL012429 | conserved hypothetical protein | 4.17503  | 4.04235  | 21.9834  | 7.0125   | 5.48813  | 5.01176  | 8.43743  | 7.53429  |
| AAEL005270 | conserved hypothetical protein | 1.39885  | 0.805271 | 2.34458  | 1.57817  | 8.25023  | 8.20281  | 1536.78  | 599.913  |
| AAEL002805 | conserved hypothetical protein | 21.4783  | 27.1815  | 11.4547  | 11.7     | 18.6736  | 19.6988  | 12.1956  | 19.4282  |
| AAEL002157 | conserved hypothetical protein | 9.5529   | 8.39455  | 7.90413  | 8.12231  | 17.5318  | 17.6795  | 2.02109  | 6.88348  |
| AAEL002195 | conserved hypothetical protein | 14.9505  | 13.8642  | 18.6695  | 17.7672  | 10.2747  | 10.9688  | 1.21474  | 7.68294  |
| AAEL001293 | conserved hypothetical protein | 107.057  | 117.692  | 16.5382  | 70.9498  | 14.1175  | 12.0045  | 256.484  | 152.125  |
| AAEL011017 | conserved hypothetical protein | 14.2329  | 15.9552  | 9.04173  | 15.3782  | 15.1224  | 13.4685  | 81.409   | 38.3487  |
| AAEL001635 | conserved hypothetical protein | 18.8078  | 16.8565  | 27.9933  | 25.0912  | 15.3581  | 13.843   | 1.59725  | 10.8095  |
| AAEL010843 | conserved hypothetical protein | 233      | 252.7    | 261.411  | 233.106  | 198.434  | 185.634  | 425.684  | 256.813  |
| AAEL000837 | conserved hypothetical protein | 0        | 0.207368 | 53.7461  | 276.444  | 0.163604 | 0        | 0.276717 | 0        |
| AAEL015577 | conserved hypothetical protein | 5.94681  | 10.3625  | 11.1575  | 8.92232  | 13.1048  | 14.71    | 334.683  | 115.743  |
| AAEL000847 | conserved hypothetical protein | 41.5896  | 42.9595  | 28.6355  | 26.577   | 49.3868  | 47.4931  | 36.4243  | 43.7636  |
| AAEL010874 | conserved hypothetical protein | 0        | 0        | 5.9055   | 80.3902  | 0        | 0        | 0        | 0        |
| AAEL004436 | conserved hypothetical protein | 93.011   | 92.7955  | 14.068   | 18.8346  | 61.8942  | 62.9594  | 54.9231  | 70.6823  |
| AAEL013267 | conserved hypothetical protein | 0.102935 | 0.198644 | 0.187059 | 0.144515 | 1.56359  | 0.945889 | 85.8547  | 38.7457  |
| AAEL001569 | conserved hypothetical protein | 167.336  | 154.294  | 178.753  | 179.972  | 129.029  | 136.179  | 900.897  | 547.345  |
| AAEL003511 | conserved hypothetical protein | 0.260097 | 0.220982 | 73.9442  | 1150.04  | 0.118723 | 0.194026 | 0.471035 | 0.570492 |
| AAEL015595 | conserved hypothetical protein | 81.1926  | 84.4219  | 58.0957  | 67.058   | 85.3756  | 93.7279  | 259.259  | 104.52   |
| AAEL008086 | conserved hypothetical protein | 9.18     | 11.7157  | 20.5712  | 12.8209  | 8.43038  | 5.77199  | 2.70066  | 10.3828  |

|            |                                |          |          |          |          |          |          |          |         |
|------------|--------------------------------|----------|----------|----------|----------|----------|----------|----------|---------|
| AAEL000276 | conserved hypothetical protein | 39.909   | 38.6721  | 28.5551  | 31.792   | 37.192   | 38.4678  | 18.9512  | 29.3611 |
| AAEL001179 | conserved hypothetical protein | 0        | 0        | 0.298558 | 14.456   | 0        | 0        | 0        | 0       |
| AAEL014214 | conserved hypothetical protein | 0.643336 | 0.565513 | 0.739758 | 0.718227 | 1.92753  | 0.801214 | 76.7368  | 36.8654 |
| AAEL005874 | conserved hypothetical protein | 25.5305  | 21.0753  | 27.7816  | 50.2241  | 20.9492  | 20.0102  | 33.119   | 33.6936 |
| AAEL007685 | conserved hypothetical protein | 39.9006  | 39.9348  | 47.1278  | 41.3194  | 27.8581  | 28.052   | 17.0113  | 24.5843 |
| AAEL013816 | conserved hypothetical protein | 19.1817  | 17.6238  | 25.1738  | 23.383   | 11.2045  | 10.7769  | 6.35663  | 12.8778 |
| AAEL003191 | conserved hypothetical protein | 10.6254  | 11.9314  | 18.1139  | 15.5419  | 12.016   | 11.0008  | 0.146191 | 4.85647 |
| AAEL011330 | conserved hypothetical protein | 61.1921  | 53.6275  | 180.081  | 154.85   | 25.928   | 27.5833  | 1.72249  | 34.3251 |
| AAEL011300 | conserved hypothetical protein | 91.0712  | 65.6801  | 0.251709 | 0.451062 | 0.489    | 0.316776 | 0.141663 | 36.593  |
| AAEL008259 | conserved hypothetical protein | 62.9326  | 65.6259  | 23.5265  | 23.7082  | 96.1776  | 99.6014  | 25.53    | 36.4097 |
| AAEL001447 | conserved hypothetical protein | 37.9636  | 37.3174  | 24.6941  | 23.885   | 33.3834  | 34.4399  | 14.1186  | 24.2642 |
| AAEL005558 | conserved hypothetical protein | 95.1549  | 96.2595  | 45.0317  | 54.6011  | 91.977   | 92.2026  | 325.767  | 167.799 |
| AAEL000102 | conserved hypothetical protein | 10.9439  | 12.487   | 19.3916  | 18.7345  | 19.8237  | 18.4648  | 80.1969  | 34.3398 |
| AAEL000019 | conserved hypothetical protein | 4.76343  | 4.08605  | 38.6094  | 34.6815  | 106.651  | 108.621  | 5.90883  | 19.1931 |
| AAEL008678 | conserved hypothetical protein | 55.4643  | 48.7179  | 117.495  | 109.401  | 38.1775  | 44.1602  | 1.19909  | 34.0874 |
| AAEL010097 | conserved hypothetical protein | 977.487  | 871.946  | 1557.82  | 1392.4   | 281.124  | 280.847  | 11.2781  | 316.059 |
| AAEL006407 | conserved hypothetical protein | 34.2451  | 27.8821  | 39.9814  | 50.122   | 17.1206  | 17.3295  | 1.80521  | 16.7088 |
| AAEL006632 | conserved hypothetical protein | 16.164   | 15.642   | 37.6585  | 32.3489  | 8.23662  | 7.97269  | 4.00287  | 9.1684  |
| AAEL002105 | conserved hypothetical protein | 10.5386  | 10.5972  | 20.3815  | 14.5551  | 8.78327  | 8.69105  | 2.94336  | 8.29274 |
| AAEL005880 | conserved hypothetical protein | 23.1746  | 23.4776  | 32.5971  | 30.794   | 20.0069  | 24.2128  | 16.7458  | 24.582  |
| AAEL002811 | conserved hypothetical protein | 6.99262  | 1.80709  | 4.32106  | 3.47412  | 6.21213  | 7.2441   | 2081.5   | 960.054 |
| AAEL012860 | conserved hypothetical protein | 12.7046  | 17.4346  | 23.2352  | 11.974   | 10.5572  | 11.0672  | 291.489  | 141.298 |
| AAEL013800 | conserved hypothetical protein | 12.3749  | 14.3909  | 18.1031  | 14.6945  | 16.8849  | 17.6334  | 50.6014  | 22.9402 |
| AAEL003445 | conserved hypothetical protein | 6.37702  | 6.52537  | 13.7339  | 10.8032  | 9.85496  | 8.42344  | 61.1506  | 24.9121 |
| AAEL001594 | conserved hypothetical protein | 13.0766  | 9.46178  | 8.05278  | 13.6316  | 4.19848  | 4.11334  | 0.697591 | 4.53753 |
| AAEL000406 | conserved hypothetical protein | 0.054073 | 0.061883 | 0.059548 | 0.022979 | 2.61307  | 0.429676 | 32.6098  | 10.728  |
| AAEL001301 | conserved hypothetical protein | 0        | 0.434249 | 0.225384 | 0.156505 | 0.168727 | 0.061379 | 701.698  | 404.629 |
| AAEL004863 | conserved hypothetical protein | 8.57695  | 8.54027  | 2.9845   | 3.4865   | 27.5662  | 30.4234  | 0.445476 | 4.37623 |
| AAEL007792 | conserved hypothetical protein | 0.183495 | 0.427666 | 0.290236 | 0.290589 | 1.38887  | 1.35923  | 74.8677  | 29.3255 |
| AAEL005543 | conserved hypothetical protein | 0.178457 | 0.034912 | 0.088508 | 0.359771 | 8.81264  | 1.12063  | 206.605  | 43.2321 |
| AAEL006847 | conserved hypothetical protein | 64.2531  | 60.3284  | 97.1241  | 96.4852  | 61.3087  | 60.5374  | 37.6507  | 45.0371 |
| AAEL010944 | conserved hypothetical protein | 10.7396  | 11.519   | 17.8799  | 39.1617  | 12.8042  | 14.0889  | 0.830351 | 4.85633 |
| AAEL013984 | conserved hypothetical protein | 7.91455  | 8.79546  | 40.9705  | 33.7685  | 86.1186  | 80.8474  | 0.390142 | 4.51013 |
| AAEL007863 | conserved hypothetical protein | 15.9482  | 15.0823  | 20.4819  | 18.2602  | 17.4118  | 16.8051  | 6.20795  | 11.7999 |
| AAEL010684 | conserved hypothetical protein | 36.7166  | 33.9314  | 66.9309  | 118.813  | 35.0369  | 32.4179  | 64.4726  | 38.6664 |

|            |                                |          |          |          |          |          |          |          |          |
|------------|--------------------------------|----------|----------|----------|----------|----------|----------|----------|----------|
| AAEL006143 | conserved hypothetical protein | 4.99039  | 4.11302  | 360.684  | 572.509  | 10.0827  | 12.6361  | 2.14059  | 3.09262  |
| AAEL010242 | conserved hypothetical protein | 0        | 0        | 0        | 0.109799 | 0.113428 | 0.368621 | 6.95734  | 0        |
| AAEL011955 | conserved hypothetical protein | 25.7766  | 27.331   | 35.9201  | 34.1568  | 27.2951  | 30.1386  | 6.8801   | 14.184   |
| AAEL010345 | conserved hypothetical protein | 78.4153  | 67.4163  | 43.8079  | 43.7896  | 31.7011  | 34.2707  | 33.8765  | 56.856   |
| AAEL010731 | conserved hypothetical protein | 26.1243  | 22.887   | 29.9508  | 30.2819  | 53.0911  | 55.2888  | 129.404  | 59.5741  |
| AAEL001187 | conserved hypothetical protein | 42.8699  | 39.4719  | 57.1068  | 48.2843  | 45.0739  | 42.8822  | 16.1156  | 29.9213  |
| AAEL010412 | conserved hypothetical protein | 20.2288  | 17.9381  | 49.1125  | 26.7906  | 22.97    | 20.8779  | 4.51494  | 14.323   |
| AAEL015357 | conserved hypothetical protein | 3.45319  | 3.10553  | 0        | 0.094747 | 0        | 0.070271 | 121.511  | 56.6184  |
| AAEL001998 | conserved hypothetical protein | 50.8181  | 39.0323  | 26.099   | 25.9814  | 102.24   | 90.4596  | 1281.41  | 588.757  |
| AAEL013202 | conserved hypothetical protein | 8.83955  | 11.9109  | 12.5095  | 10.6654  | 7.8238   | 12.7027  | 3.90877  | 10.807   |
| AAEL004786 | conserved hypothetical protein | 0.815006 | 1.17762  | 0.142864 | 0.145968 | 4.74807  | 1.16966  | 76.2036  | 28.0725  |
| AAEL005602 | conserved hypothetical protein | 50.0789  | 37.6417  | 60.5457  | 56.9706  | 35.6088  | 43.4269  | 0.543194 | 27.5204  |
| AAEL006011 | conserved hypothetical protein | 0        | 0        | 0        | 1.39084  | 2.29486  | 1.65645  | 1505.43  | 607.053  |
| AAEL000944 | conserved hypothetical protein | 155.371  | 193.907  | 127.97   | 112.744  | 75.751   | 75.9291  | 134.911  | 147.773  |
| AAEL008580 | conserved hypothetical protein | 75.9332  | 76.9904  | 87.5914  | 78.0589  | 65.082   | 70.7463  | 1.14649  | 35.5379  |
| AAEL014039 | conserved hypothetical protein | 404.415  | 468.002  | 425.399  | 377.726  | 635.338  | 626.312  | 1098.31  | 740.22   |
| AAEL001499 | conserved hypothetical protein | 0.069228 | 0.226022 | 0.310636 | 0.132229 | 0.283262 | 0.174473 | 74.884   | 32.196   |
| AAEL013775 | conserved hypothetical protein | 3.33724  | 2.75599  | 3.89447  | 3.80444  | 38.1178  | 40.5854  | 13636.2  | 5592.98  |
| AAEL010338 | conserved hypothetical protein | 77.4793  | 51.801   | 2.47859  | 2.36604  | 9.56629  | 9.25519  | 4770.84  | 2254.41  |
| AAEL012650 | conserved hypothetical protein | 6.60588  | 0.228181 | 0.624621 | 0.452781 | 0.058515 | 0.634689 | 26.209   | 0.986629 |
| AAEL015379 | conserved hypothetical protein | 30.2663  | 33.4853  | 47.8727  | 47.2838  | 35.1876  | 38.9536  | 115.939  | 60.9657  |
| AAEL004980 | conserved hypothetical protein | 50.6206  | 44.22    | 70.046   | 68.9162  | 34.5334  | 35.6726  | 20.8632  | 32.6315  |
| AAEL006754 | conserved hypothetical protein | 1.08782  | 1.18229  | 0.968501 | 1.03636  | 5.87109  | 2.53963  | 49.22    | 21.3768  |
| AAEL007692 | conserved hypothetical protein | 62.1856  | 59.5749  | 51.6685  | 52.2652  | 42.0219  | 39.9893  | 3.01117  | 26.8392  |
| AAEL011203 | conserved hypothetical protein | 0.43401  | 0.294183 | 0.090845 | 1.04569  | 3.86549  | 0.826887 | 46.8164  | 10.9869  |
| AAEL013122 | conserved hypothetical protein | 0.079035 | 0.18364  | 131.12   | 546.117  | 0.286626 | 0.233671 | 1.29425  | 0.413464 |
| AAEL012147 | conserved hypothetical protein | 21.0229  | 19.186   | 18.5342  | 17.3289  | 22.2066  | 22.1478  | 3.10195  | 10.9899  |
| AAEL012932 | conserved hypothetical protein | 45.5488  | 56.9103  | 16.8355  | 15.4001  | 52.1151  | 51.2898  | 23.441   | 35.7509  |
| AAEL004882 | conserved hypothetical protein | 17.1757  | 16.6743  | 27.8465  | 23.477   | 19.3976  | 19.521   | 5.70213  | 12.3763  |
| AAEL012676 | conserved hypothetical protein | 17.0927  | 16.3865  | 24.5014  | 37.9531  | 5.75153  | 5.40633  | 4.56376  | 11.3067  |
| AAEL001898 | conserved hypothetical protein | 62.1123  | 60.6622  | 33.4568  | 47.6468  | 75.7952  | 71.1696  | 24.9605  | 35.8515  |
| AAEL001129 | conserved hypothetical protein | 39.2065  | 40.1475  | 66.597   | 36.1544  | 43.4575  | 44.7342  | 13.3506  | 26.6452  |
| AAEL012684 | conserved hypothetical protein | 304.978  | 461.875  | 97.1905  | 115.978  | 151.704  | 147.038  | 454.694  | 400.706  |
| AAEL005259 | conserved hypothetical protein | 5.3851   | 6.15431  | 7.51962  | 8.10841  | 10.8674  | 11.9478  | 52.0546  | 22.8352  |
| AAEL015240 | conserved hypothetical protein | 28.0816  | 11.5989  | 17.1942  | 29.5685  | 17.7603  | 24.3228  | 9.11818  | 14.6435  |

|            |                                |          |          |          |          |          |          |          |         |
|------------|--------------------------------|----------|----------|----------|----------|----------|----------|----------|---------|
| AAEL005588 | conserved hypothetical protein | 15.2942  | 13.1263  | 0        | 0        | 0.08946  | 0        | 0        | 6.35559 |
| AAEL013394 | conserved hypothetical protein | 48.6118  | 42.0464  | 62.379   | 64.6362  | 35.9628  | 38.6123  | 31.6425  | 37.2057 |
| AAEL013813 | conserved hypothetical protein | 6.92477  | 7.20154  | 3.50901  | 4.62944  | 12.16    | 14.3662  | 0.141904 | 4.80224 |
| AAEL010280 | conserved hypothetical protein | 43.7332  | 64.4719  | 9.04639  | 10.4573  | 9.13044  | 10.9921  | 14.4605  | 20.7769 |
| AAEL007045 | conserved hypothetical protein | 10.8018  | 11.5807  | 22.4474  | 19.7123  | 5.19399  | 5.37204  | 0.57921  | 6.73596 |
| AAEL008671 | conserved hypothetical protein | 58.1035  | 57.014   | 65.6368  | 64.1924  | 41.7466  | 41.7829  | 189.36   | 83.7251 |
| AAEL001621 | conserved hypothetical protein | 0.089381 | 0.104631 | 0        | 0.07683  | 0        | 0.088086 | 324.967  | 311.729 |
| AAEL014701 | conserved hypothetical protein | 41.8727  | 42.2231  | 53.0775  | 44.3912  | 49.4061  | 47.0236  | 13.6146  | 27.3931 |
| AAEL009927 | conserved hypothetical protein | 12.4256  | 12.8423  | 11.6668  | 9.31412  | 33.0568  | 35.7057  | 0.408088 | 6.28126 |
| AAEL011082 | conserved hypothetical protein | 12.8407  | 12.9853  | 16.4314  | 15.2927  | 14.973   | 17.31    | 6.10058  | 12.1524 |
| AAEL013211 | conserved hypothetical protein | 51.6477  | 50.4235  | 77.1973  | 74.1903  | 64.716   | 65.8716  | 0.723607 | 26.3539 |
| AAEL007075 | conserved hypothetical protein | 49.3126  | 53.1729  | 93.3385  | 81.068   | 65.0334  | 68.678   | 14.8011  | 34.0254 |
| AAEL005962 | conserved hypothetical protein | 14.2775  | 14.2314  | 23.4402  | 14.6516  | 20.3173  | 20.5679  | 3.06322  | 10.344  |
| AAEL013864 | conserved hypothetical protein | 18.1713  | 14.8206  | 0.701737 | 1.78431  | 1.54009  | 1.08706  | 0.503842 | 10.9344 |
| AAEL003467 | conserved hypothetical protein | 26.4221  | 20.9051  | 75.6492  | 58.623   | 87.5469  | 74.495   | 0.670689 | 6.2212  |
| AAEL006971 | conserved hypothetical protein | 1.49723  | 2.82502  | 2.17113  | 1.62215  | 9.2835   | 37.6244  | 0        | 1.43092 |
| AAEL000401 | conserved hypothetical protein | 12.5244  | 9.93065  | 25.9286  | 19.1556  | 6.8136   | 7.68062  | 2.819    | 8.19934 |
| AAEL000774 | conserved hypothetical protein | 11.1087  | 12.7166  | 6.96075  | 5.72923  | 23.4141  | 17.523   | 0.115551 | 5.05191 |
| AAEL003688 | conserved hypothetical protein | 29.9372  | 25.4365  | 122.809  | 103.897  | 14.511   | 14.9364  | 11.1288  | 19.4294 |
| AAEL011101 | conserved hypothetical protein | 94.1763  | 95.4197  | 67.7134  | 76.0082  | 95.951   | 100.985  | 17.8026  | 50.2271 |
| AAEL000698 | conserved hypothetical protein | 13.9329  | 12.6645  | 16.2065  | 17.7453  | 5.12919  | 5.88184  | 0.050117 | 9.6971  |
| AAEL007465 | conserved hypothetical protein | 0.935373 | 0.66341  | 10.3533  | 3.12359  | 1.07832  | 0.855102 | 0.280052 | 0.50731 |
| AAEL008469 | conserved hypothetical protein | 48.3023  | 44.9302  | 64.0741  | 54.8353  | 96.1269  | 99.1104  | 23.0717  | 45.609  |
| AAEL012635 | conserved hypothetical protein | 0.111572 | 0.065054 | 0.060765 | 0.070317 | 0.679408 | 0.697575 | 114.295  | 53.4159 |
| AAEL001495 | conserved hypothetical protein | 119.117  | 125.09   | 134.198  | 139.872  | 154.554  | 153.459  | 10.4033  | 56.9859 |
| AAEL003451 | conserved hypothetical protein | 16.5178  | 16.7226  | 28.4731  | 23.8238  | 19.6829  | 17.5104  | 1.10634  | 8.12914 |
| AAEL000956 | conserved hypothetical protein | 39.0314  | 32.1176  | 151.815  | 77.1466  | 21.7025  | 21.3855  | 11.3087  | 21.1582 |
| AAEL000691 | conserved hypothetical protein | 173.658  | 197.093  | 90.6769  | 107.917  | 315.932  | 295.647  | 27.3555  | 93.4735 |
| AAEL010254 | conserved hypothetical protein | 21.9174  | 19.824   | 18.1817  | 19.5054  | 13.5704  | 14.0892  | 6.84764  | 13.5169 |
| AAEL003457 | conserved hypothetical protein | 28.1459  | 41.1071  | 40.5423  | 44.2678  | 54.6273  | 46.2386  | 0.30538  | 7.58075 |
| AAEL014366 | conserved hypothetical protein | 6.08921  | 6.64458  | 6.36413  | 23.8024  | 10.3257  | 10.6329  | 8.34463  | 7.48048 |
| AAEL010081 | conserved hypothetical protein | 42.2956  | 34.5206  | 92.9955  | 91.1467  | 13.6006  | 14.7302  | 10.4292  | 17.2553 |
| AAEL010253 | conserved hypothetical protein | 11.2533  | 7.79666  | 11.0792  | 11.8268  | 2.54978  | 2.2045   | 1.30749  | 6.12155 |
| AAEL002898 | conserved hypothetical protein | 64.7078  | 74.1841  | 68.8696  | 74.1151  | 41.0941  | 44.0563  | 12.5821  | 44.0152 |
| AAEL007328 | conserved hypothetical protein | 28.9631  | 29.4364  | 24.3416  | 25.57    | 37.1473  | 37.1427  | 12.9723  | 19.863  |



|            |                                |          |          |          |          |          |          |          |          |
|------------|--------------------------------|----------|----------|----------|----------|----------|----------|----------|----------|
| AAEL001722 | conserved hypothetical protein | 56.1169  | 64.6949  | 1.60735  | 1.40106  | 2.90329  | 1.8744   | 0.919568 | 39.2315  |
| AAEL014771 | conserved hypothetical protein | 14.2401  | 13.1485  | 26.3389  | 22.6768  | 14.0041  | 13.2087  | 60.7694  | 27.931   |
| AAEL009097 | conserved hypothetical protein | 67.5957  | 20.0833  | 2.47005  | 14.7804  | 5.97057  | 5.26919  | 0.265645 | 8.73125  |
| AAEL011301 | conserved hypothetical protein | 33.1808  | 30.8648  | 51.1794  | 48.0292  | 27.2123  | 29.3232  | 5.54261  | 14.6368  |
| AAEL008088 | conserved hypothetical protein | 26.794   | 28.0703  | 60.794   | 54.2841  | 22.0846  | 23.3183  | 3.80102  | 15.901   |
| AAEL000459 | conserved hypothetical protein | 194.211  | 168.645  | 87.0874  | 104.978  | 104.826  | 107.718  | 165.179  | 161.739  |
| AAEL008478 | conserved hypothetical protein | 49.1752  | 49.0675  | 17.2481  | 29.807   | 8.22252  | 5.19223  | 496.038  | 257.006  |
| AAEL004920 | conserved hypothetical protein | 52.6163  | 56.6249  | 42.3508  | 34.683   | 100.716  | 101.898  | 15.3717  | 30.4306  |
| AAEL008291 | conserved hypothetical protein | 50.5458  | 55.553   | 41.8615  | 38.0643  | 50.922   | 54.015   | 154.643  | 83.3682  |
| AAEL000940 | conserved hypothetical protein | 0.725176 | 0.148278 | 2.30141  | 1.20591  | 1.67678  | 2.22224  | 1811.42  | 832.121  |
| AAEL008176 | conserved hypothetical protein | 50.0161  | 61.8149  | 8.21726  | 6.19431  | 71.6551  | 84.2082  | 681.888  | 326.142  |
| AAEL003542 | conserved hypothetical protein | 27.6903  | 25.6601  | 29.0099  | 28.8264  | 14.6768  | 16.6003  | 1.45513  | 16.868   |
| AAEL006053 | conserved hypothetical protein | 1.39847  | 1.08578  | 0.925307 | 1.64528  | 2.90078  | 4.75119  | 2252.92  | 1187.7   |
| AAEL009662 | conserved hypothetical protein | 15.3967  | 16.2234  | 9.55995  | 9.48273  | 22.824   | 22.1223  | 3.40047  | 10.1768  |
| AAEL000476 | conserved hypothetical protein | 12.6488  | 12.0843  | 19.2594  | 21.1118  | 8.7917   | 9.13235  | 2.29178  | 9.63343  |
| AAEL008419 | conserved hypothetical protein | 14.5837  | 15.912   | 14.5061  | 13.5944  | 13.6091  | 13.7873  | 4.40434  | 9.86717  |
| AAEL007238 | conserved hypothetical protein | 8.7255   | 6.38832  | 9.31206  | 7.75058  | 6.82038  | 4.17332  | 77.4461  | 24.5239  |
| AAEL000730 | conserved hypothetical protein | 35.5993  | 34.7522  | 10.7433  | 16.426   | 33.6286  | 33.7793  | 13.8405  | 21.9164  |
| AAEL004846 | conserved hypothetical protein | 30.3136  | 28.4124  | 24.5229  | 27.7497  | 18.238   | 20.5316  | 24.8928  | 30.7746  |
| AAEL009043 | conserved hypothetical protein | 11.4255  | 14.5422  | 5.48136  | 9.17026  | 3.24244  | 3.81975  | 85.0083  | 43.1067  |
| AAEL009372 | conserved hypothetical protein | 38.8559  | 40.9965  | 51.8647  | 50.3727  | 49.005   | 44.7722  | 14.3077  | 28.1869  |
| AAEL014054 | conserved hypothetical protein | 36.7961  | 33.6269  | 17.6471  | 28.3998  | 19.1581  | 18.0452  | 6.22233  | 22.4083  |
| AAEL014876 | conserved hypothetical protein | 1.15113  | 0.572981 | 941.639  | 3038.58  | 0.582554 | 0.703059 | 1.15478  | 0.975255 |
| AAEL004826 | conserved hypothetical protein | 8.09426  | 10.1236  | 12.3345  | 9.85372  | 2.45075  | 8.36438  | 2.43134  | 12.791   |
| AAEL000923 | conserved hypothetical protein | 457.961  | 466.393  | 291.131  | 436.805  | 386.677  | 406.989  | 5.45712  | 212.081  |
| AAEL004234 | conserved hypothetical protein | 166.189  | 166.337  | 322.146  | 282.925  | 108.975  | 111.094  | 80.3617  | 106.501  |
| AAEL005312 | conserved hypothetical protein | 149.664  | 120.639  | 196.892  | 150.429  | 103.439  | 115.774  | 5.11294  | 91.7529  |
| AAEL006207 | conserved hypothetical protein | 0.22798  | 0.073027 | 0.435705 | 0.324168 | 0.58431  | 0.471478 | 148.282  | 80.4913  |
| AAEL014483 | conserved hypothetical protein | 12.4953  | 12.535   | 14.9413  | 16.8674  | 11.8062  | 12.7016  | 1.30738  | 6.42686  |
| AAEL009177 | conserved hypothetical protein | 22.7669  | 21.9395  | 34.9412  | 29.5553  | 28.5603  | 29.4176  | 5.84529  | 13.3991  |
| AAEL010061 | conserved hypothetical protein | 1.02611  | 0.897012 | 0.939016 | 0.713007 | 1.266    | 1.37841  | 46.0054  | 19.554   |
| AAEL001369 | conserved hypothetical protein | 10.7472  | 10.6258  | 3.28594  | 5.31258  | 4.94657  | 8.28172  | 3.21071  | 8.26603  |
| AAEL004026 | conserved hypothetical protein | 30.1908  | 29.2261  | 10.8126  | 16.2506  | 29.3425  | 31.0727  | 6.58774  | 22.5657  |
| AAEL009393 | conserved hypothetical protein | 18.5942  | 17.4615  | 23.0927  | 29.9068  | 24.0152  | 23.2085  | 5.51263  | 10.9127  |
| AAEL009985 | conserved hypothetical protein | 5.2814   | 4.26255  | 8.50638  | 13.4191  | 225.695  | 48.2574  | 35236.2  | 11501.6  |

|            |                                |          |          |          |         |          |          |          |          |
|------------|--------------------------------|----------|----------|----------|---------|----------|----------|----------|----------|
| AAEL002483 | conserved hypothetical protein | 27.2841  | 31.9439  | 16.079   | 14.1976 | 27.4758  | 26.5422  | 8.5522   | 20.9547  |
| AAEL001315 | conserved hypothetical protein | 17.0438  | 17.8294  | 27.5004  | 24.7508 | 20.7917  | 21.9099  | 3.19433  | 10.3108  |
| AAEL008177 | conserved hypothetical protein | 30.2286  | 30.0068  | 16.7739  | 24.3071 | 31.9764  | 29.8822  | 5.70145  | 16.8322  |
| AAEL010535 | conserved hypothetical protein | 49.7785  | 52.2537  | 61.9696  | 53.8163 | 71.0636  | 71.8658  | 35.328   | 41.4991  |
| AAEL007584 | conserved hypothetical protein | 75.2639  | 57.9588  | 76.1105  | 87.7165 | 51.0366  | 56.2277  | 1.00163  | 31.3133  |
| AAEL014146 | conserved hypothetical protein | 11.5447  | 11.2024  | 12.5335  | 7.16302 | 14.2788  | 12.869   | 8.89115  | 17.364   |
| AAEL007133 | conserved hypothetical protein | 37.35    | 33.4581  | 22.1819  | 26.9265 | 33.9617  | 35.6695  | 0.712651 | 26.6067  |
| AAEL010407 | conserved hypothetical protein | 38.0213  | 34.3319  | 40.207   | 33.7725 | 13.0242  | 13.2547  | 2.40835  | 20.5698  |
| AAEL002406 | conserved hypothetical protein | 52.2358  | 42.1184  | 145.247  | 120.973 | 129.467  | 87.3337  | 353.166  | 163.803  |
| AAEL005013 | conserved hypothetical protein | 41.1226  | 42.6727  | 39.9607  | 63.2163 | 49.5718  | 43.0579  | 74.793   | 35.0532  |
| AAEL001306 | conserved hypothetical protein | 25.7483  | 26.9852  | 187.761  | 790.694 | 41.5398  | 36.2048  | 0.782386 | 10.4514  |
| AAEL002322 | conserved hypothetical protein | 16.2983  | 17.7783  | 11.2815  | 12.6052 | 23.5163  | 22.3349  | 3.35061  | 11.1233  |
| AAEL007234 | conserved hypothetical protein | 31.674   | 31.5185  | 20.7228  | 26.0442 | 36.1703  | 35.4575  | 12.8359  | 20.9369  |
| AAEL008644 | conserved hypothetical protein | 0.057108 | 0        | 11.5887  | 36.6324 | 0.051116 | 0        | 0        | 0        |
| AAEL012628 | conserved hypothetical protein | 16.3149  | 15.0915  | 14.2481  | 17.9092 | 10.4621  | 12.0945  | 3.84897  | 10.0946  |
| AAEL006549 | conserved hypothetical protein | 23.3657  | 23.9547  | 12.1683  | 14.0878 | 27.7883  | 27.2661  | 4.66275  | 13.6757  |
| AAEL004856 | conserved hypothetical protein | 0.152624 | 0.087762 | 140.457  | 200.867 | 0        | 0        | 0.174077 | 0        |
| AAEL011710 | conserved hypothetical protein | 18.8677  | 22.2246  | 29.1376  | 25.6096 | 13.9688  | 16.6909  | 6.80649  | 17.4594  |
| AAEL001189 | conserved hypothetical protein | 21.9137  | 19.0917  | 81.7904  | 462.754 | 20.1818  | 19.5781  | 32.8618  | 20.6426  |
| AAEL002734 | conserved hypothetical protein | 11.9334  | 10.8128  | 13.6019  | 12.4487 | 14.9288  | 16.9258  | 3.98124  | 9.04227  |
| AAEL006322 | conserved hypothetical protein | 89.5454  | 87.2839  | 100.521  | 101.778 | 95.0987  | 90.119   | 195.982  | 113.497  |
| AAEL005904 | conserved hypothetical protein | 77.8128  | 78.1014  | 124.734  | 123.976 | 38.6506  | 42.8951  | 14.7242  | 42.3395  |
| AAEL009744 | conserved hypothetical protein | 10.6961  | 10.1489  | 17.5635  | 16.9192 | 9.14787  | 11.9258  | 0.481927 | 7.69107  |
| AAEL002263 | conserved hypothetical protein | 0.575004 | 1.61947  | 1.66004  | 1.15501 | 12.0872  | 11.2517  | 4929.67  | 2797     |
| AAEL006867 | conserved hypothetical protein | 46.1535  | 45.866   | 54.9184  | 51.625  | 40.8858  | 44.9504  | 22.6043  | 29.3379  |
| AAEL002175 | conserved hypothetical protein | 33.1692  | 31.9219  | 27.0688  | 25.0338 | 74.0362  | 19.001   | 106.319  | 38.9296  |
| AAEL003112 | conserved hypothetical protein | 0.040232 | 0        | 0.776021 | 5.98342 | 0.221955 | 0.161616 | 0.265103 | 0.445514 |
| AAEL004655 | conserved hypothetical protein | 13.1389  | 14.1239  | 12.1686  | 15.0455 | 12.3376  | 10.9479  | 2.45894  | 7.52501  |
| AAEL008365 | conserved hypothetical protein | 23.478   | 20.79    | 18.9744  | 32.473  | 44.1988  | 40.0112  | 1.36229  | 8.34624  |
| AAEL011085 | conserved hypothetical protein | 54.4315  | 50.9358  | 43.258   | 51.9313 | 32.7312  | 32.5964  | 0.637724 | 26.0288  |
| AAEL013548 | conserved hypothetical protein | 23.0084  | 23.9757  | 32.4943  | 28.9188 | 22.3423  | 22.5024  | 7.50128  | 16.0135  |
| AAEL004842 | conserved hypothetical protein | 19.2068  | 20.1155  | 28.2201  | 22.6457 | 23.6771  | 23.0456  | 5.87695  | 13.6174  |
| AAEL005265 | conserved hypothetical protein | 26.4776  | 25.4238  | 21.5458  | 27.0902 | 28.0898  | 29.7275  | 3.36252  | 15.569   |
| AAEL006406 | conserved hypothetical protein | 0        | 0        | 0.455523 | 0       | 0        | 0        | 8.25316  | 0        |
| AAEL004515 | conserved hypothetical protein | 39.6203  | 36.7652  | 74.7562  | 54.468  | 29.8185  | 32.0913  | 10.1052  | 29.5769  |

|            |                                |          |          |          |          |          |          |          |          |
|------------|--------------------------------|----------|----------|----------|----------|----------|----------|----------|----------|
| AAEL011296 | conserved hypothetical protein | 0        | 0        | 0.380225 | 0        | 0.971667 | 1.57457  | 247.269  | 84.8602  |
| AAEL006069 | conserved hypothetical protein | 4.91509  | 3.70642  | 3.40157  | 1.82976  | 9.78799  | 7.34606  | 57.451   | 18.5956  |
| AAEL006155 | conserved hypothetical protein | 41.3413  | 43.9486  | 45.7896  | 48.7229  | 36.0288  | 34.4833  | 21.1007  | 27.8871  |
| AAEL005759 | conserved hypothetical protein | 0.755041 | 0.146054 | 1176.69  | 3192.21  | 1.48952  | 0.997763 | 1.14784  | 1.09658  |
| AAEL005032 | conserved hypothetical protein | 23.5414  | 18.6097  | 13.3101  | 37.0863  | 24.4103  | 26.628   | 39.2452  | 20.4883  |
| AAEL003944 | conserved hypothetical protein | 28.3905  | 32.4723  | 30.8436  | 29.3332  | 55.7772  | 55.7506  | 7.74946  | 17.8031  |
| AAEL012100 | conserved hypothetical protein | 45.9014  | 46.0595  | 17.2221  | 18.7516  | 39.6228  | 40.6039  | 6.49942  | 23.3916  |
| AAEL009274 | conserved hypothetical protein | 140.238  | 146.822  | 267.871  | 199.804  | 74.018   | 75.5212  | 108.735  | 124.509  |
| AAEL007431 | conserved hypothetical protein | 131.624  | 141.862  | 148.939  | 129.883  | 174.129  | 179.812  | 53.4919  | 74.5272  |
| AAEL000318 | conserved hypothetical protein | 0.070123 | 0        | 42.6795  | 476.398  | 0        | 0        | 0        | 0.119104 |
| AAEL008112 | conserved hypothetical protein | 15.1253  | 15.7373  | 16.3852  | 14.9011  | 11.5228  | 10.9132  | 3.77314  | 9.75597  |
| AAEL015080 | conserved hypothetical protein | 14.1657  | 13.7174  | 38.8589  | 28.8602  | 10.8385  | 11.37    | 1.43434  | 12.1806  |
| AAEL008281 | conserved hypothetical protein | 0.062184 | 0.148199 | 0        | 0.109834 | 0.279803 | 0.242469 | 293.656  | 154.999  |
| AAEL008034 | conserved hypothetical protein | 5.48114  | 6.76352  | 11.6607  | 28.9655  | 8.73971  | 8.04144  | 2.08878  | 2.91231  |
| AAEL012399 | conserved hypothetical protein | 41.1699  | 37.1198  | 6.11462  | 12.1545  | 6.41108  | 8.02503  | 6.66919  | 33.2135  |
| AAEL005404 | conserved hypothetical protein | 1.19211  | 1.11065  | 1.35686  | 7.36562  | 0.330464 | 0.341017 | 0.678387 | 0.956612 |
| AAEL013635 | conserved hypothetical protein | 10.8042  | 11.6803  | 16.5837  | 15.0154  | 7.69842  | 8.24748  | 0.779701 | 6.76324  |
| AAEL006890 | conserved hypothetical protein | 163.128  | 180.271  | 203.137  | 196.016  | 259.335  | 253.119  | 2.74202  | 81.626   |
| AAEL008802 | conserved hypothetical protein | 724.057  | 661.36   | 238.934  | 206.356  | 256.905  | 218.641  | 58.8954  | 277.772  |
| AAEL015013 | conserved hypothetical protein | 8.42944  | 9.33449  | 12.4044  | 11.2226  | 11.0167  | 9.07942  | 2.68683  | 12.7209  |
| AAEL005822 | conserved hypothetical protein | 12.316   | 10.5295  | 21.6778  | 18.8439  | 16.9796  | 16.4776  | 96.2431  | 46.8731  |
| AAEL007758 | conserved hypothetical protein | 7.81146  | 11.074   | 4.24795  | 6.73453  | 8.02158  | 9.21123  | 440.741  | 185.048  |
| AAEL009155 | conserved hypothetical protein | 0.436791 | 0.101334 | 0        | 0        | 1.7189   | 1.27016  | 266.948  | 107.884  |
| AAEL010611 | conserved hypothetical protein | 43.331   | 50.9929  | 44.946   | 36.1487  | 72.5429  | 61.5483  | 61.024   | 64.3587  |
| AAEL000211 | conserved hypothetical protein | 50.3116  | 53.1844  | 52.157   | 51.0052  | 64.3326  | 67.8604  | 20.7926  | 42.4154  |
| AAEL008894 | conserved hypothetical protein | 22.5417  | 23.5685  | 22.0661  | 20.5905  | 23.5599  | 22.1606  | 1.59327  | 12.2967  |
| AAEL013725 | conserved hypothetical protein | 10.8385  | 11.2057  | 10.7095  | 10.5015  | 13.9161  | 15.3566  | 1.52049  | 6.73561  |
| AAEL007117 | conserved hypothetical protein | 0        | 0        | 116.67   | 507.085  | 0.104477 | 0.114105 | 0.284603 | 0.212296 |
| AAEL011109 | conserved hypothetical protein | 3.77022  | 3.455    | 18.8386  | 6.09272  | 7.17945  | 8.94167  | 3.286    | 3.13491  |
| AAEL000984 | conserved hypothetical protein | 25.0472  | 27.4039  | 23.1221  | 21.761   | 25.4244  | 26.6346  | 1.54012  | 12.8959  |
| AAEL009467 | conserved hypothetical protein | 17.4605  | 11.6708  | 10.9867  | 12.1103  | 7.12648  | 6.54916  | 457.659  | 171.282  |
| AAEL010150 | conserved hypothetical protein | 10.5059  | 11.3708  | 10.0269  | 10.8358  | 13.8504  | 12.1051  | 0.92813  | 5.40654  |
| AAEL014908 | conserved hypothetical protein | 14.2189  | 14.3119  | 11.7778  | 13.0775  | 19.5308  | 24.5403  | 5.21825  | 11.116   |
| AAEL005353 | conserved hypothetical protein | 2.45835  | 3.39794  | 6.82864  | 3.67864  | 10.5755  | 9.36539  | 147.716  | 53.5572  |
| AAEL004969 | conserved hypothetical protein | 41.3209  | 57.3103  | 7.24576  | 2.56639  | 24.4232  | 21.3952  | 0.978587 | 21.5308  |

|            |                                |          |          |          |          |          |          |          |          |
|------------|--------------------------------|----------|----------|----------|----------|----------|----------|----------|----------|
| AAEL007797 | conserved hypothetical protein | 15.212   | 14.6328  | 18.9876  | 18.0562  | 13.3383  | 14.8276  | 1.68854  | 6.276    |
| AAEL008070 | conserved hypothetical protein | 3.06298  | 6.17125  | 6.22615  | 6.17074  | 7.33783  | 10.12    | 6.66714  | 0.639958 |
| AAEL009500 | conserved hypothetical protein | 24.9514  | 21.3552  | 35.5051  | 39.913   | 12.259   | 12.459   | 8.68768  | 19.9856  |
| AAEL002090 | conserved hypothetical protein | 96.686   | 95.2539  | 77.4627  | 89.1874  | 93.2259  | 85.8606  | 62.6337  | 71.5922  |
| AAEL012031 | conserved hypothetical protein | 11.8887  | 13.4864  | 20.1244  | 17.6384  | 14.2206  | 13.7438  | 1.34067  | 7.18274  |
| AAEL004798 | conserved hypothetical protein | 0.736245 | 1.06724  | 0.245263 | 1.10921  | 10.971   | 4.19995  | 3343.32  | 1032.35  |
| AAEL006211 | conserved hypothetical protein | 22.3992  | 20.9116  | 39.781   | 32.5869  | 11.6261  | 12.4169  | 1.75327  | 9.4663   |
| AAEL000496 | conserved hypothetical protein | 0.619175 | 0.396783 | 354.828  | 1526.66  | 0.480332 | 0.6014   | 2.76615  | 0.729852 |
| AAEL000344 | conserved hypothetical protein | 0        | 0.081638 | 0.105024 | 28.6944  | 0.063797 | 0        | 0        | 0.119859 |
| AAEL000500 | conserved hypothetical protein | 2.35117  | 4.98795  | 1.44902  | 1.41912  | 3.16072  | 5.02899  | 14838.4  | 8641.12  |
| AAEL000782 | conserved hypothetical protein | 22.9505  | 21.858   | 27.5296  | 22.0244  | 24.5112  | 24.5593  | 9.75696  | 16.7052  |
| AAEL000857 | conserved hypothetical protein | 36.1283  | 36.4313  | 36.7824  | 42.5712  | 26.9542  | 28.2964  | 8.34692  | 20.9649  |
| AAEL000961 | conserved hypothetical protein | 137.543  | 136.762  | 9.18705  | 17.6993  | 119.051  | 115.279  | 1.04194  | 69.4186  |
| AAEL002081 | conserved hypothetical protein | 121.313  | 137.128  | 227.151  | 163.048  | 129.453  | 117.015  | 77.9972  | 105.806  |
| AAEL002578 | conserved hypothetical protein | 0.894645 | 0.374955 | 1.91048  | 2.15496  | 18.8607  | 11.9854  | 1880.53  | 692.492  |
| AAEL004113 | conserved hypothetical protein | 17.2097  | 16.9029  | 16.2355  | 15.4587  | 15.9744  | 16.6945  | 7.39355  | 13.9621  |
| AAEL004775 | conserved hypothetical protein | 10.9202  | 9.74046  | 10.6628  | 9.18648  | 6.99513  | 5.98614  | 1.05045  | 4.8941   |
| AAEL004818 | conserved hypothetical protein | 32.0975  | 34.8914  | 30.3336  | 26.4185  | 48.1249  | 46.6262  | 4.3315   | 18.6693  |
| AAEL004838 | conserved hypothetical protein | 42.4589  | 40.4198  | 57.5926  | 49.783   | 56.6528  | 54.2319  | 18.8065  | 27.275   |
| AAEL005094 | conserved hypothetical protein | 1.42582  | 1.47437  | 4529.5   | 965.735  | 0.848395 | 1.47434  | 1.75862  | 1.34514  |
| AAEL005163 | conserved hypothetical protein | 28.664   | 31.3222  | 37.564   | 29.6489  | 39.185   | 41.9607  | 5.99654  | 16.2635  |
| AAEL005580 | conserved hypothetical protein | 20.1693  | 23.8194  | 15.6135  | 20.0576  | 20.8156  | 20.7781  | 16.4653  | 22.7547  |
| AAEL005737 | conserved hypothetical protein | 6.2826   | 6.63502  | 10.3317  | 9.35072  | 8.58771  | 7.77107  | 0.296251 | 3.41172  |
| AAEL006987 | conserved hypothetical protein | 0.727431 | 1.08206  | 0.497543 | 0.241683 | 6.87771  | 1.41966  | 60.3238  | 9.79847  |
| AAEL007342 | conserved hypothetical protein | 4.9691   | 2.52927  | 33.616   | 33.2811  | 14.6642  | 18.9136  | 2273.12  | 844.841  |
| AAEL008174 | conserved hypothetical protein | 4.97786  | 4.48128  | 5.39507  | 6.30236  | 6.46703  | 6.32353  | 47.9634  | 21.5726  |
| AAEL008220 | conserved hypothetical protein | 18.7742  | 18.9428  | 12.863   | 10.3459  | 35.2171  | 35.5827  | 6.74018  | 14.6202  |
| AAEL008278 | conserved hypothetical protein | 0.27968  | 0.263914 | 0.418874 | 0.531643 | 3.11516  | 1.42088  | 278.728  | 113.656  |
| AAEL008716 | conserved hypothetical protein | 20.2724  | 22.4588  | 18.4946  | 20.5256  | 23.5465  | 22.4608  | 3.01184  | 10.5463  |
| AAEL009226 | conserved hypothetical protein | 0        | 0        | 21.2925  | 8.24224  | 0        | 0        | 0.077771 | 0        |
| AAEL011807 | conserved hypothetical protein | 15.7504  | 14.6009  | 18.3366  | 17.6103  | 14.3121  | 13.1371  | 1.9463   | 7.49943  |
| AAEL012227 | conserved hypothetical protein | 119.601  | 120.684  | 135.044  | 111.902  | 160.011  | 155.03   | 52.6458  | 81.912   |
| AAEL013051 | conserved hypothetical protein | 5.21798  | 4.21361  | 5.57176  | 5.99401  | 4.54146  | 3.18412  | 0.511495 | 5.71189  |
| AAEL013494 | conserved hypothetical protein | 59.2984  | 73.0366  | 37.5319  | 33.5031  | 44.1417  | 52.5336  | 57.0889  | 71.8682  |
| AAEL015288 | conserved hypothetical protein | 0.224426 | 0.086668 | 27.7869  | 203.839  | 0.204671 | 0.074215 | 0        | 0.124749 |

|            |                                           |          |          |          |          |          |         |          |          |
|------------|-------------------------------------------|----------|----------|----------|----------|----------|---------|----------|----------|
| AAEL000144 | conserved hypothetical protein            | 0.206943 | 0.136506 | 94.9901  | 456.745  | 0.072972 | 0.21332 | 0        | 0.179158 |
| AAEL009114 | conserved hypothetical protein            | 6.55371  | 6.23971  | 19.4843  | 16.3845  | 27.8975  | 26.3387 | 53.8235  | 22.0243  |
| AAEL006883 | conserved hypothetical protein            | 8.05353  | 10.3439  | 5.23937  | 6.99954  | 86.6465  | 14.8245 | 18.9646  | 13.9899  |
| AAEL010001 | conserved hypothetical protein            | 14.1122  | 11.168   | 15.2129  | 14.4494  | 13.424   | 13.584  | 3.87487  | 9.09004  |
| AAEL009755 | conserved hypothetical protein            | 13.5546  | 12.7969  | 17.4108  | 14.5743  | 11.9374  | 13.1644 | 3.51552  | 8.50003  |
| AAEL003037 | conserved hypothetical protein            | 13.8514  | 11.2106  | 13.117   | 9.14729  | 23.888   | 17.701  | 242.57   | 95.3758  |
| AAEL006787 | conserved hypothetical protein            | 35.1689  | 34.1254  | 52.9157  | 48.9185  | 31.8388  | 32.0419 | 2.97989  | 17.0736  |
| AAEL007500 | conserved hypothetical protein            | 1.00689  | 0.925618 | 1.26151  | 7.27707  | 2.12669  | 1.82476 | 1.08044  | 0.873165 |
| AAEL012671 | conserved hypothetical protein            | 137.182  | 138.788  | 69.5383  | 100.521  | 128.007  | 121.596 | 382.725  | 222.864  |
| AAEL001651 | conserved hypothetical protein            | 17.8052  | 18.0631  | 21.7331  | 21.0387  | 15.9288  | 15.3747 | 3.42326  | 10.511   |
| AAEL005826 | conserved hypothetical protein            | 1.35325  | 1.16245  | 1.20345  | 0.585738 | 3.79899  | 3.01598 | 35.8409  | 13.5942  |
| AAEL013968 | conserved hypothetical protein            | 39.8505  | 43.7023  | 34.9706  | 31.2001  | 75.5109  | 72.6666 | 10.802   | 25.6143  |
| AAEL002467 | conserved hypothetical protein            | 1.03048  | 2.28648  | 0.687604 | 0.516465 | 6.56492  | 15.7208 | 8343.24  | 2767.37  |
| AAEL015122 | cop9 signalosome complex subunit          | 3.89964  | 5.6433   | 7.07354  | 6.74362  | 5.4107   | 6.76244 | 1.92279  | 6.91006  |
| AAEL006560 | cop-coated vesicle membrane protein P24   | 48.2102  | 51.5086  | 15.0925  | 13.5946  | 18.4014  | 20.6578 | 33.9979  | 43.4791  |
| AAEL000208 | copii-coated vesicle membrane protein P24 | 129.653  | 170.933  | 42.1786  | 33.3374  | 48.3059  | 51.9821 | 195.393  | 158.419  |
| AAEL013389 | coproporphyrinogen iii oxidase            | 8.06525  | 9.03915  | 8.28615  | 6.36152  | 10.1228  | 10.9024 | 66.8127  | 28.1615  |
| AAEL007327 | cornichon protein, putative               | 6.71764  | 7.68103  | 4.4301   | 1.4329   | 10.5295  | 3.04794 | 11.187   | 5.69422  |
| AAEL009249 | coronin                                   | 1.41485  | 1.50202  | 1.07868  | 0.701717 | 1.86151  | 1.7184  | 58.6622  | 19.3874  |
| AAEL011982 | cortactin                                 | 11.1431  | 11.8281  | 15.7691  | 13.4405  | 12.2319  | 11.8599 | 72.8045  | 32.4868  |
| AAEL007422 | cp27, putative                            | 32.119   | 32.1138  | 44.0883  | 38.2531  | 21.53    | 23.0229 | 10.3502  | 23.3381  |
| AAEL001308 | CRAL/TRIO domain-containing protein       | 86.7033  | 82.1847  | 3.71655  | 6.04693  | 42.8418  | 38.7729 | 2.2013   | 49.1889  |
| AAEL010027 | CRAL/TRIO domain-containing protein       | 4.92231  | 4.77064  | 35.5968  | 10.57    | 3.7745   | 3.44534 | 122.03   | 57.1296  |
| AAEL003347 | CRAL/TRIO domain-containing protein       | 7.73885  | 5.29152  | 74.0168  | 180.899  | 10.829   | 10.1661 | 19.3557  | 7.71238  |
| AAEL006523 | crk                                       | 27.1613  | 24.1649  | 43.4565  | 37.1217  | 13.8056  | 14.1859 | 8.01161  | 18.2189  |
| AAEL010008 | crotonobetainyl-CoA-hydratase, putative   | 22.1039  | 24.2944  | 26.0441  | 25.1296  | 29.1482  | 29.7569 | 9.05225  | 17.6114  |
| AAEL011453 | CTL14                                     | 1.69791  | 2.4815   | 3.77331  | 3.74298  | 79.2079  | 37.8532 | 2.08347  | 1.25673  |
| AAEL011446 | CTL17                                     | 35.2311  | 45.1961  | 10.5939  | 13.6355  | 27.7288  | 20.7437 | 0.477066 | 13.6996  |
| AAEL002280 | ct12                                      | 33.1564  | 32.5185  | 9.32948  | 13.773   | 23.5403  | 23.127  | 1124.75  | 452.91   |
| AAEL011407 | CTL20                                     | 0        | 0.455867 | 0        | 0        | 1.59511  | 1.53816 | 51.6562  | 19.2501  |
| AAEL011408 | CTL21                                     | 16.0665  | 19.0594  | 28.4098  | 27.1236  | 35.8844  | 41.3034 | 0.410259 | 7.82736  |
| AAEL017484 | CTLGA4                                    | 10.3649  | 7.29883  | 10.6625  | 12.5127  | 1.4725   | 2.1665  | 0.495457 | 5.1103   |
| AAEL005641 | CTLGA5                                    | 28.5272  | 33.3462  | 22.6735  | 30.8637  | 100.135  | 93.7388 | 2195.88  | 792.114  |
| AAEL009209 | CTLGA6                                    | 29.5211  | 23.7145  | 24.9407  | 22.9263  | 26.4241  | 27.666  | 5.34436  | 14.3807  |
| AAEL017265 | CTLGA7                                    | 12.5282  | 12.8521  | 14.442   | 12.32    | 30.5506  | 42.3668 | 121.929  | 39.2994  |

|            |                                                       |          |          |          |          |          |          |          |         |
|------------|-------------------------------------------------------|----------|----------|----------|----------|----------|----------|----------|---------|
| AAELO11610 | CTLGA8                                                | 4.19527  | 6.42063  | 3.63747  | 8.9475   | 46.5348  | 76.6135  | 0.694359 | 1.05351 |
| AAELO00543 | CTLMA11                                               | 16.9788  | 12.9912  | 7.54182  | 9.39568  | 14.3583  | 12.8223  | 2.91455  | 7.66042 |
| AAELO11455 | CTLMA12                                               | 12.8872  | 8.31682  | 6.39729  | 5.4294   | 92.1932  | 68.9649  | 0        | 6.52511 |
| AAELO05455 | ctp synthase                                          | 55.579   | 58.9281  | 40.4298  | 38.7202  | 111.154  | 113.418  | 25.6992  | 36.0747 |
| AAELO07353 | cullin                                                | 18.5196  | 17.7854  | 21.2896  | 21.7652  | 16.1782  | 17.3201  | 4.91943  | 11.3135 |
| AAELO06271 | CUSOD2                                                | 303.433  | 299.404  | 645.142  | 454.918  | 166.197  | 172.812  | 16.8768  | 121.368 |
| AAELO01751 | cyclin                                                | 22.2176  | 24.3514  | 18.2899  | 18.4526  | 42.5105  | 40.3848  | 8.68977  | 19.1536 |
| AAELO00672 | cyclin a                                              | 137.75   | 126.392  | 242.581  | 194.266  | 57.9898  | 63.2973  | 11.0865  | 78.9295 |
| AAELO08256 | cyclin A3, putative                                   | 25.3449  | 24.0316  | 30.4916  | 29.2952  | 23.3648  | 24.2082  | 0.555916 | 12.6205 |
| AAELO10094 | cyclin b                                              | 338.019  | 322.118  | 708.58   | 554.171  | 186.946  | 204.361  | 9.31968  | 179.155 |
| AAELO09572 | cyclin B3                                             | 102.459  | 99.1289  | 134.761  | 132.028  | 115.112  | 118.64   | 2.39916  | 46.2658 |
| AAELO11648 | cyclin d                                              | 15.1164  | 16.0246  | 9.6551   | 14.7242  | 7.18651  | 6.13517  | 0.347654 | 12.0864 |
| AAELO09057 | cyclin e                                              | 35.6556  | 33.9137  | 54.4688  | 47.7886  | 16.2185  | 16.4237  | 1.27861  | 19.8314 |
| AAELO04865 | cyclin g                                              | 202.035  | 196.623  | 186.758  | 202.904  | 131.475  | 142.593  | 394.09   | 231.052 |
| AAELO04839 | cyclin t                                              | 37.3554  | 33.8679  | 31.3597  | 33.7961  | 33.1959  | 32.582   | 13.9409  | 24.2645 |
| AAELO04492 | cyclin-dependent kinases regulatory subunit. putative | 93.1914  | 91.5409  | 148.26   | 133.894  | 68.5762  | 71.6517  | 5.77023  | 43.1563 |
| AAELO05232 | cyclin-dependent kinases regulatory subunit. putative | 25.8289  | 25.2507  | 28.8306  | 33.1108  | 13.1539  | 15.2596  | 2.03114  | 11.7149 |
| AAELO03993 | cyclohex-1-ene-1-carboxyl-CoA hydratase, putative     | 131.77   | 170.102  | 81.0017  | 75.4607  | 137.556  | 128.535  | 114.859  | 101.851 |
| AAELO02031 | CYP12F7                                               | 1.81684  | 1.37747  | 1.53748  | 1.37278  | 2.76702  | 4.0876   | 376.754  | 174.257 |
| AAELO06827 | CYP12F8                                               | 11.5042  | 8.75704  | 18.257   | 18.9318  | 5.93066  | 5.74234  | 0.606482 | 5.70963 |
| AAELO14412 | CYP304B2                                              | 0.062562 | 0.036255 | 0.065566 | 0.025188 | 0.201469 | 0.188253 | 116.136  | 48.7706 |
| AAELO00338 | CYP325E3                                              | 31.2847  | 21.0044  | 0        | 0.063949 | 0.056855 | 0.275533 | 0.058517 | 12.9241 |
| AAELO12266 | CYP4C38                                               | 17.6674  | 14.8519  | 25.6283  | 28.4905  | 13.73    | 13.5477  | 128.323  | 70.2566 |
| AAELO07816 | CYP4D23                                               | 5.5204   | 6.20772  | 2.20966  | 1.13239  | 6.09413  | 6.09078  | 512.837  | 198.095 |
| AAELO07815 | CYP4D24                                               | 0.106165 | 0.041223 | 0.025917 | 0.03005  | 0.064318 | 0        | 82.9578  | 39.5237 |
| AAELO08345 | CYP4G35                                               | 13.8995  | 18.2285  | 11.2794  | 11.7307  | 40.979   | 35.4167  | 0.131207 | 14.8766 |
| AAELO04054 | CYP4G36                                               | 151.421  | 149.829  | 98.6233  | 108.234  | 300.257  | 267.721  | 1.39499  | 57.4788 |
| AAELO07830 | CYP4H29                                               | 0.75334  | 0.721593 | 0.816287 | 0.385496 | 1.43289  | 0.971026 | 26.6773  | 9.49859 |
| AAELO07812 | CYP4H32                                               | 0.072767 | 0.212755 | 0.053722 | 0.061887 | 0.164036 | 0.250867 | 586.655  | 329.767 |
| AAELO12492 | CYP6AA5                                               | 1.41074  | 1.02317  | 3.44739  | 2.7503   | 5.35351  | 4.96031  | 147.781  | 49.2742 |
| AAELO07010 | CYP6AG4                                               | 2.53131  | 2.21809  | 45.0498  | 26.3583  | 103.869  | 114.828  | 69.1516  | 40.4331 |
| AAELO07473 | CYP6AH1                                               | 0.796102 | 0.963601 | 0.563043 | 0.356165 | 1.57843  | 3.05351  | 51.4397  | 22.4978 |

|             |                                    |          |          |          |          |          |          |          |          |
|-------------|------------------------------------|----------|----------|----------|----------|----------|----------|----------|----------|
| AAELO08889  | CYP6AL1                            | 6.71137  | 11.2683  | 0.601056 | 0.661148 | 1.44926  | 1.77013  | 0.269595 | 5.20081  |
| AAELO14893  | CYP6BB2                            | 8.47306  | 6.56482  | 4.41405  | 5.46754  | 4.59992  | 4.99592  | 54.6166  | 16.4596  |
| AAELO17539  | CYP6BY1                            | 1.99537  | 0.361093 | 0.62771  | 0.392902 | 0.349477 | 1.21493  | 48.8781  | 14.615   |
| AAELO02046  | CYP6CB1                            | 6.8543   | 9.72356  | 122.581  | 78.8318  | 47.8242  | 53.2431  | 0.927473 | 7.96863  |
| AAELO09127  | CYP6M11                            | 1.63277  | 1.13026  | 3.26138  | 2.7755   | 4.39662  | 9.18791  | 177.303  | 72.8693  |
| AAELO09128  | CYP6M6                             | 3.30637  | 2.90231  | 1.91431  | 1.80929  | 4.23015  | 4.03711  | 82.6651  | 37.5655  |
| AAELO09129  | CYP6Z9                             | 4.34591  | 3.58666  | 5.44622  | 5.2295   | 20.1334  | 14.3617  | 816.945  | 302.151  |
| AAELO06795  | CYP9J15                            | 0.330211 | 0.213044 | 0.135593 | 0.266093 | 1.89236  | 1.21576  | 160.87   | 54.8601  |
| AAELO06815  | CYP9J16                            | 1.04688  | 1.33294  | 1.60557  | 1.79551  | 4.04219  | 4.06774  | 57.3371  | 24.2331  |
| AAELO14609  | CYP9J26                            | 0.214119 | 0.070888 | 0.220545 | 0.050977 | 0.309442 | 1.01102  | 68.4086  | 32.252   |
| AAELO08846  | CYP9J32                            | 0.706573 | 0.600246 | 0.33629  | 0.383303 | 7.21887  | 0.463628 | 27.9002  | 11.4412  |
| AAELO02638  | CYP9J6                             | 1.56747  | 2.36395  | 14.5669  | 18.6619  | 4.18232  | 4.30738  | 81.2144  | 36.3723  |
| AAELO06811  | CYP9J8                             | 0.329365 | 0.301619 | 0.756777 | 0.469821 | 3.33609  | 1.72967  | 264.905  | 60.6484  |
| AAELO14608  | CYP9J8                             | 0.218426 | 0.063585 | 0.318078 | 0.184143 | 0.718841 | 0.754165 | 101.39   | 19.0028  |
| AAELO14605  | CYP9J9                             | 1.59336  | 1.26394  | 2.5175   | 2.70783  | 6.86864  | 4.79874  | 196.999  | 80.7686  |
| AAELO06793  | CYP9J9                             | 1.71308  | 1.53974  | 2.79644  | 2.20983  | 7.64231  | 8.9236   | 424.676  | 232.746  |
| AAELO14611  | CYPJ19                             | 0.73575  | 0.534352 | 0.459474 | 0.460509 | 1.27286  | 2.14302  | 76.5531  | 26.6706  |
| AAELO07416  | cysteine dioxygenase               | 23.8692  | 29.1534  | 12.3975  | 11.0564  | 22.4748  | 21.8491  | 332.444  | 203.782  |
| AAELO15445  | cysteine dioxygenase               | 2.04717  | 3.32505  | 0.415302 | 0.39046  | 0.705002 | 1.09787  | 19.9084  | 31.6458  |
| AAELO08468  | cysteine synthase                  | 46.3433  | 45.0062  | 12.7429  | 11.3337  | 16.2529  | 14.7875  | 33.1506  | 50.1118  |
| AAELO08467  | cysteine synthase                  | 0.532888 | 0.623114 | 0.160241 | 0.238531 | 0.244405 | 0.401751 | 79.9386  | 37.6727  |
| AAELO00356  | cysteinech venom protein, putative | 0.512102 | 0.597796 | 681.618  | 2969.03  | 0        | 0.488371 | 1.21973  | 1.81428  |
| AAELO005487 | cysteinech venom protein, putative | 0.940058 | 0.704485 | 1643.33  | 290.557  | 0.96161  | 1.74899  | 0.389118 | 0.796048 |
| AAELO00302  | cysteinech venom protein, putative | 1.1926   | 2.46656  | 4563.27  | 1986.99  | 0.728446 | 2.58524  | 0.749649 | 1.46835  |
| AAELO08473  | cysteinech venom protein, putative | 41.0158  | 35.8291  | 39.3909  | 115.255  | 119.058  | 95.3581  | 200.07   | 67.4867  |
| AAELO00369  | cysteinech venom protein, putative | 0.122705 | 0.720531 | 1220.61  | 51.9831  | 0.44147  | 0.358461 | 0.535417 | 0        |
| AAELO00361  | cysteinech venom protein, putative | 0.792137 | 0        | 1021.11  | 192.053  | 0        | 0        | 0.903256 | 0        |
| AAELO00379  | cysteinech venom protein, putative | 0.473115 | 1.082    | 5.79577  | 100.97   | 2.16882  | 3.30169  | 0        | 0        |
| AAELO005090 | cysteinech venom protein, putative | 0.479067 | 0.274717 | 2537.05  | 820.118  | 0.860471 | 0.46668  | 0.539813 | 0        |
| AAELO00333  | cysteinech venom protein, putative | 0.343029 | 0        | 1198.65  | 237.045  | 0.150804 | 0.330751 | 0.179823 | 0.56297  |
| AAELO00363  | cysteinech venom protein, putative | 0.167219 | 0        | 1100.67  | 76.1519  | 0        | 0        | 0.359702 | 0        |
| AAELO00317  | cysteinech venom protein, putative | 2.33369  | 1.70076  | 3998.76  | 388.085  | 0.264764 | 0.288474 | 1.36617  | 2.12318  |
| AAELO10017  | cytochrome B5 (cytb5)              | 199.701  | 232.34   | 340.083  | 246.884  | 237.688  | 228.764  | 663.386  | 376.877  |
| AAELO004450 | cytochrome b5, putative            | 119.996  | 133.973  | 142.968  | 167.043  | 122.889  | 130.579  | 1204.5   | 502.38   |
| AAELO12636  | cytochrome b5, putative            | 0.171707 | 0        | 0.124467 | 0.435786 | 0.538642 | 0.92184  | 134.747  | 52.2226  |

|            |                                                               |          |          |          |          |          |          |          |          |
|------------|---------------------------------------------------------------|----------|----------|----------|----------|----------|----------|----------|----------|
| AAELO14935 | cytochrome b5, putative                                       | 86.825   | 148.673  | 191.804  | 154.85   | 108.96   | 99.5247  | 351.89   | 300.188  |
| AAELO11281 | cytochrome B561                                               | 24.3719  | 22.6191  | 16.7757  | 22.5299  | 14.5079  | 18.4545  | 4.05182  | 9.14052  |
| AAELO04457 | cytochrome c                                                  | 148.392  | 180.429  | 202.433  | 147.758  | 187.682  | 184.886  | 335.946  | 282.697  |
| AAELO14944 | cytochrome c oxidase polypeptide                              | 215.474  | 249.985  | 194.708  | 160.088  | 324.02   | 312.914  | 707.169  | 495.486  |
| AAELO13009 | cytochrome c oxidase subunit iv                               | 82.1733  | 102.816  | 70.3649  | 64.4156  | 121.903  | 140.979  | 298.473  | 166.907  |
| AAELO03234 | cytochrome c oxidase, subunit VIA,<br>putative                | 297.309  | 383.478  | 297.644  | 249.309  | 436.416  | 432.84   | 1104.04  | 707.724  |
| AAELO02737 | cytochrome c oxidase, subunit VIIC,<br>putative               | 99.1718  | 140.595  | 133.407  | 99.099   | 186.82   | 157.924  | 407.125  | 220.225  |
| AAELO11514 | cytochrome c oxidase, subunit VIIC,<br>putative               | 198.545  | 211.536  | 133.742  | 165.549  | 184.005  | 180.378  | 516.731  | 429.552  |
| AAELO08880 | cytochrome c oxidase, -subunit VIb,<br>putative               | 234.403  | 259.865  | 219.594  | 203.726  | 386.777  | 407.513  | 1111.58  | 638.317  |
| AAELO09183 | cytochrome oxidase biogenesis protein<br>(oxal mitochondrial) | 22.1423  | 23.4238  | 27.5653  | 29.8307  | 32.0835  | 29.2469  | 127.433  | 56.2307  |
| AAELO14614 | cytochrome P450                                               | 0.203524 | 0.034251 | 0.193041 | 0.098615 | 0.607048 | 0.402308 | 37.7098  | 15.6706  |
| AAELO15370 | cytochrome P450                                               | 7.28038  | 7.56076  | 0.761055 | 1.64531  | 1.42966  | 1.55701  | 76.6752  | 32.2958  |
| AAELO15641 | cytochrome P450                                               | 1.11099  | 0.595207 | 0.520418 | 0.605089 | 2.21844  | 3.66563  | 67.0855  | 28.8645  |
| AAELO06824 | cytochrome P450                                               | 60.6235  | 71.1047  | 29.4064  | 26.6945  | 95.9986  | 96.4295  | 0.360214 | 12.44    |
| AAELO14830 | cytochrome P450                                               | 7.77319  | 6.66857  | 3.16202  | 2.54228  | 9.00243  | 6.17434  | 0.347678 | 4.42535  |
| AAELO09018 | cytochrome P450                                               | 3.21948  | 4.91639  | 73.4003  | 52.8735  | 35.6517  | 33.7572  | 0.344972 | 4.57752  |
| AAELO01960 | cytochrome P450                                               | 1.14492  | 1.2902   | 2.12671  | 3.34711  | 6.94104  | 5.1933   | 270.019  | 98.8194  |
| AAELO11478 | cytoplasmic dynein light chain                                | 213.736  | 216.503  | 274.254  | 266.659  | 138.7    | 136.724  | 98.8227  | 133.86   |
| AAELO02422 | cytoplasmic polyadenylation element<br>binding protein (cpeb) | 211.059  | 222.829  | 32.7996  | 49.615   | 181.874  | 187.442  | 1.6968   | 110.696  |
| AAELO02056 | Cytoplasmic tRNA 2-thiolation protein 2                       | 19.1305  | 16.5547  | 23.1633  | 16.7717  | 18.6003  | 20.6853  | 3.64581  | 9.6696   |
| AAELO05833 | cytosolic purine 5-nucleotidase                               | 59.3161  | 73.8404  | 21.3525  | 22.2775  | 23.4645  | 20.6039  | 36.4052  | 51.4132  |
| AAELO05336 | d-3-phosphoglycerate dehydrogenase                            | 109.403  | 172.111  | 14.5254  | 6.78718  | 66.68    | 57.5249  | 1330.1   | 800.954  |
| AAELO06424 | D7                                                            | 2.70363  | 1.78793  | 1.32834  | 1.08198  | 1.63645  | 2.75188  | 10.5106  | 0.708489 |
| AAELO08620 | D7 protein, putative                                          | 165.787  | 187.961  | 16.9991  | 11.5484  | 63.4465  | 60.4579  | 4.15812  | 60.9514  |
| AAELO06417 | D7 protein, putative                                          | 0.031032 | 0        | 0.142973 | 0.054671 | 0.028115 | 0.152275 | 14.658   | 0        |
| AAELO12674 | d-amino acid oxidase                                          | 2.82478  | 4.14417  | 3.82219  | 3.31953  | 12.1707  | 11.7743  | 77.0995  | 35.5762  |
| AAELO00164 | d-amino acid oxidase                                          | 3.18816  | 3.49763  | 2.7444   | 3.25865  | 4.44634  | 4.95014  | 76.4738  | 28.1437  |
| AAELO00213 | d-amino acid oxidase                                          | 97.5972  | 91.8672  | 17.901   | 17.0391  | 18.1391  | 17.2985  | 23.0231  | 31.6921  |
| AAELO12888 | dcap1                                                         | 8.77276  | 9.77244  | 9.29318  | 7.39002  | 8.46016  | 7.59439  | 66.1632  | 26.3658  |



|            |                                                         |          |          |          |         |          |          |          |         |
|------------|---------------------------------------------------------|----------|----------|----------|---------|----------|----------|----------|---------|
| AAELO07374 | DCE                                                     | 24.7154  | 33.2541  | 11.2422  | 13.0988 | 19.7912  | 20.4172  | 1.75262  | 9.00096 |
| AAELO06640 | DEAD box ATP-dependent RNA helicase                     | 16.4717  | 14.9876  | 10.6341  | 10.1288 | 22.5644  | 23.5671  | 3.22125  | 9.52731 |
| AAELO12015 | DEAD box ATP-dependent RNA helicase                     | 51.4155  | 47.4549  | 76.5022  | 73.27   | 43.6018  | 40.5212  | 0.77175  | 23.7174 |
| AAELO05744 | DEAD box ATP-dependent RNA helicase                     | 40.0271  | 44.3008  | 47.3967  | 40.2711 | 141.379  | 146.858  | 13.552   | 25.6352 |
| AAELO04978 | DEAD box ATP-dependent RNA helicase                     | 487.137  | 531.83   | 388.032  | 475.9   | 584.029  | 552.017  | 12.5774  | 249.988 |
| AAELO14904 | DEAD box ATP-dependent RNA helicase                     | 14.4461  | 15.6057  | 19.9306  | 17.3243 | 44.6216  | 45.8805  | 4.14658  | 9.42224 |
| AAELO01216 | DEAD box ATP-dependent RNA helicase                     | 228.798  | 235.638  | 131.365  | 138.911 | 301.638  | 302.452  | 73.7203  | 138.978 |
| AAELO02083 | DEAD box ATP-dependent RNA helicase                     | 212.295  | 220.362  | 309.204  | 253.609 | 355.538  | 363.572  | 442.735  | 313.147 |
| AAELO08500 | DEAD box ATP-dependent RNA helicase                     | 725.866  | 666.532  | 1104.51  | 1061.48 | 328.723  | 330.995  | 93.8866  | 341.059 |
| AAELO10402 | DEAD box ATP-dependent RNA helicase                     | 81.8629  | 86.7919  | 60.9997  | 74.4027 | 87.8916  | 85.5883  | 22.498   | 51.8436 |
| AAELO09285 | DEAD box ATP-dependent RNA helicase                     | 18.264   | 16.5698  | 21.2573  | 19.4196 | 33.7071  | 31.3016  | 4.76801  | 11.2943 |
| AAELO08728 | DEAD box ATP-dependent RNA helicase                     | 12.6482  | 13.662   | 13.8852  | 14.6266 | 15.3007  | 16.1298  | 1.56964  | 7.47604 |
| AAELO10787 | DEAD box ATP-dependent RNA helicase                     | 356.757  | 351.185  | 468.007  | 435.039 | 1813.63  | 1832.85  | 472.529  | 370.873 |
| AAELO09913 | DEAD box ATP-dependent RNA helicase                     | 45.0245  | 49.2584  | 61.0887  | 50.7535 | 59.5929  | 58.9426  | 26.4477  | 36.128  |
| AAELO13359 | DEAD box ATP-dependent RNA helicase                     | 380.21   | 400.73   | 301.669  | 263.081 | 1064.43  | 1015.4   | 706.527  | 502.224 |
| AAELO10317 | DEAD box ATP-dependent RNA helicase                     | 30.4953  | 31.0544  | 31.0177  | 28.4662 | 32.2695  | 30.6939  | 6.55938  | 17.5586 |
| AAELO01876 | decapentaplegic, deca                                   | 19.5019  | 21.0469  | 20.2983  | 19.3012 | 21.7591  | 20.9437  | 6.83551  | 14.3351 |
| AAELO03841 | DEFA                                                    | 7.71054  | 4.13138  | 24.1906  | 56.6106 | 194.688  | 646.266  | 63.1225  | 14.9364 |
| AAELO03832 | DEFC                                                    | 6.03762  | 3.96583  | 13.8373  | 24.6677 | 72.6505  | 121.426  | 6.51415  | 2.80016 |
| AAELO03857 | DEFD                                                    | 23.135   | 7.37591  | 24.2186  | 24.648  | 259.918  | 585.462  | 113.328  | 32.7201 |
| AAELO03849 | DEFE                                                    | 0        | 0        | 0        | 0       | 2.52058  | 0        | 204.207  | 391.537 |
| AAELO09996 | deformed wings, putative                                | 16.658   | 17.2286  | 23.9525  | 20.732  | 15.7532  | 16.7361  | 2.9849   | 10.1719 |
| AAELO07213 | delta(9)-desaturase, putative                           | 18.5374  | 11.5549  | 117.09   | 34.2494 | 2.37055  | 2.05275  | 3.13664  | 6.39957 |
| AAELO14287 | deoxycytidylate deaminase                               | 45.8105  | 45.5603  | 51.0702  | 32.622  | 33.1276  | 27.9097  | 2.75714  | 29.7717 |
| AAELO11245 | deoxyhypusine synthase                                  | 17.4733  | 16.6296  | 18.9391  | 13.5302 | 13.9305  | 15.5103  | 2.92657  | 9.57014 |
| AAELO08857 | deoxyribonuclease I, putative                           | 1.15311  | 1.04323  | 1.04875  | 0.69469 | 4.82822  | 4.09362  | 1765.14  | 1104.73 |
| AAELO01641 | deoxyribonuclease I, putative                           | 52.3525  | 50.9105  | 34.8455  | 33.0184 | 155.992  | 124.434  | 2.51916  | 32.9287 |
| AAELO04092 | deoxyribonuclease I, putative                           | 0.191659 | 0.055572 | 0.070263 | 0       | 0.172335 | 0.328089 | 466.627  | 243.572 |
| AAELO02042 | deoxyribonuclease I, putative                           | 7.29333  | 8.59009  | 4.59847  | 4.84941 | 9.642    | 10.0258  | 0.117653 | 3.60386 |
| AAELO12418 | deoxyribonuclease ii                                    | 23.284   | 20.9886  | 50.9153  | 43.8248 | 6.89206  | 6.64714  | 1.65477  | 10.7669 |
| AAELO12629 | deoxyuridine 5'-triphosphate nucleotidohydrolase        | 245.948  | 234.909  | 329.593  | 299.789 | 126.788  | 118.936  | 10.1882  | 150.604 |
| AAELO05579 | developmentally regulated GTP-binding protein 1 (drg 1) | 45.5574  | 42.896   | 37.6243  | 33.8954 | 55.1396  | 54.0698  | 21.2797  | 32.1639 |
| AAELO13847 | diacylglycerol kinase, zeta, iota                       | 20.5545  | 21.6007  | 18.8909  | 22.8026 | 24.4492  | 24.09    | 4.23183  | 13.3679 |

|            |                                                            |          |          |          |          |          |          |          |         |
|------------|------------------------------------------------------------|----------|----------|----------|----------|----------|----------|----------|---------|
| AAEL008878 | diacylglycerol o-acyltransferase                           | 82.6732  | 74.9277  | 87.1892  | 85.1329  | 60.0856  | 64.8791  | 539.921  | 251.664 |
| AAEL013844 | diazepam binding inhibitor, putative                       | 121.238  | 127.425  | 40.1371  | 45.1421  | 81.56    | 70.5298  | 13.6321  | 79.0654 |
| AAEL009214 | diazepam binding inhibitor, putative                       | 418.679  | 433.745  | 36.8448  | 69.9884  | 47.3923  | 46.3862  | 4103.43  | 1986.74 |
| AAEL006836 | dihydropteridine reductase                                 | 252.778  | 252.179  | 408.177  | 337.922  | 181.114  | 174.908  | 14.7996  | 119.346 |
| AAEL000354 | dimeric dihydrodiol dehydrogenase                          | 13.4327  | 11.9514  | 33.5684  | 34.6004  | 7.41038  | 6.45804  | 0.420211 | 5.27692 |
| AAEL000834 | dimethylaniline monooxygenase                              | 76.8082  | 79.7054  | 12.7592  | 9.26302  | 65.0359  | 42.3421  | 13.0746  | 52.686  |
| AAEL000797 | dimethylaniline monooxygenase                              | 1.14653  | 0.756624 | 1.88399  | 3.31352  | 2.02939  | 0.213276 | 93.8112  | 41.7422 |
| AAEL000820 | dimethylaniline monooxygenase                              | 1.08706  | 0.752681 | 0.239453 | 0.157388 | 0.407029 | 0.572995 | 92.9589  | 43.3976 |
| AAEL015110 | dipeptidyl-peptidase                                       | 0        | 0.045143 | 0        | 0        | 0.016217 | 0.154939 | 207.916  | 99.7666 |
| AAEL010912 | dipeptidyl-peptidase                                       | 72.0293  | 67.9231  | 175.256  | 168.586  | 36.8261  | 41.4027  | 17.6855  | 42.8016 |
| AAEL015386 | dipeptidyl-peptidase                                       | 0.126527 | 0.187911 | 0.170194 | 0.12202  | 1.25729  | 1.89834  | 653.577  | 359.279 |
| AAEL003678 | diphosphoinositol polyphosphate phosphohydrolase, putative | 40.0133  | 40.7246  | 50.5482  | 42.7621  | 39.1113  | 36.7787  | 25.3992  | 33.4475 |
| AAEL002016 | disulfide oxidoreductase                                   | 26.8423  | 24.5335  | 29.0436  | 27.2356  | 21.1086  | 21.6861  | 11.0026  | 17.4043 |
| AAEL006166 | DNA (cytosine-5)-methyltransferase                         | 21.2053  | 19.8748  | 21.0336  | 19.2955  | 17.0836  | 16.7328  | 6.77047  | 12.8462 |
| AAEL005597 | DNA helicase recq5                                         | 42.6887  | 45.1488  | 51.5052  | 48.9312  | 38.6963  | 38.3392  | 7.87464  | 26.3815 |
| AAEL005858 | DNA mismatch repair protein mlh1                           | 11.1173  | 9.34327  | 13.0613  | 13.4759  | 8.59313  | 8.98277  | 0.801777 | 5.96787 |
| AAEL011780 | DNA mismatch repair protein muts                           | 14.6126  | 12.7133  | 21.1446  | 18.8271  | 7.00662  | 7.29012  | 1.13811  | 7.12374 |
| AAEL014856 | DNA mismatch repair protein spellchecker 1                 | 20.1768  | 19.2476  | 25.5759  | 27.9072  | 16.2291  | 16.8223  | 2.16056  | 8.89476 |
| AAEL001175 | DNA photolyase                                             | 23.3713  | 20.8034  | 30.1882  | 26.0514  | 20.5394  | 23.9896  | 5.2534   | 16.7251 |
| AAEL008247 | DNA polymerase alpha catalytic subunit                     | 28.6977  | 24.4198  | 30.347   | 35.2462  | 22.8385  | 21.7906  | 2.01904  | 13.552  |
| AAEL014178 | DNA polymerase delta catalytic subunit                     | 25.7945  | 24.0442  | 22.9106  | 25.1129  | 21.7748  | 22.3114  | 2.04952  | 13.6026 |
| AAEL002785 | DNA polymerase epsilon subunit b                           | 20.1766  | 18.0828  | 23.9031  | 25.7408  | 7.55637  | 7.93278  | 1.63887  | 9.90413 |
| AAEL010085 | DNA polymerase epsilon subunit, putative                   | 39.9565  | 37.0693  | 65.5885  | 58.1699  | 27.8752  | 28.9597  | 1.28975  | 20.0477 |
| AAEL004562 | DNA polymerase eta                                         | 11.3656  | 11.539   | 15.353   | 14.1557  | 11.6729  | 13.3558  | 0.870337 | 6.21359 |
| AAEL006715 | DNA polymerase iota                                        | 31.3969  | 33.3157  | 48.6482  | 44.3232  | 32.284   | 31.867   | 7.99601  | 20.676  |
| AAEL005888 | DNA polymerase theta                                       | 66.4237  | 66.5926  | 56.206   | 58.8479  | 50.0934  | 54.1063  | 1.50931  | 31.9039 |
| AAEL004017 | DNA polymerase v                                           | 53.728   | 57.5701  | 36.3214  | 30.3841  | 64.9549  | 60.6772  | 7.52462  | 29.8036 |
| AAEL009851 | DNA polymerase zeta catalytic subunit                      | 12.3795  | 11.086   | 12.6061  | 12.258   | 6.53938  | 6.32112  | 1.99366  | 6.71913 |
| AAEL014314 | DNA primase                                                | 35.2935  | 32.4399  | 48.5278  | 46.2941  | 21.3536  | 21.9316  | 2.89366  | 16.898  |
| AAEL004698 | DNA primase large subunit                                  | 26.81    | 22.8314  | 28.3849  | 32.3687  | 10.9063  | 11.4883  | 1.85338  | 13.313  |
| AAEL011772 | DNA repair protein rad50                                   | 17.8431  | 17.9945  | 25.3535  | 19.2822  | 11.9089  | 13.2917  | 2.92016  | 11.2966 |
| AAEL006080 | DNA repair protein rad51                                   | 16.9901  | 17.9583  | 29.6663  | 25.4541  | 13.9466  | 14.7315  | 5.04365  | 10.8492 |
| AAEL003893 | DNA repair protein xp-c / rad4                             | 22.737   | 20.9348  | 55.4492  | 53.8683  | 11.7718  | 11.5541  | 2.39652  | 13.5368 |
| AAEL002407 | DNA repair protein xp-e                                    | 72.6099  | 69.5607  | 63.2931  | 62.5313  | 92.9633  | 88.2868  | 35.1522  | 46.4696 |

|            |                                                               |         |         |         |         |         |         |          |         |
|------------|---------------------------------------------------------------|---------|---------|---------|---------|---------|---------|----------|---------|
| AAEL008519 | DNA replication factor Cdt1                                   | 50.9481 | 41.8993 | 112.977 | 75.2323 | 8.99705 | 9.68246 | 5.07188  | 26.3101 |
| AAEL000201 | DNA replication helicase dna2                                 | 13.0996 | 11.6416 | 19.2081 | 17.9166 | 6.57764 | 6.49685 | 0.788585 | 7.0202  |
| AAEL007007 | DNA replication licensing factor MCM2                         | 55.6228 | 48.5228 | 61.6279 | 90.8505 | 21.8831 | 20.2226 | 5.24031  | 28.4276 |
| AAEL011811 | DNA replication licensing factor MCM3                         | 48.9815 | 45.0334 | 53.1483 | 67.2878 | 13.7061 | 13.2854 | 5.00647  | 25.0417 |
| AAEL010086 | DNA replication licensing factor MCM4                         | 45.112  | 79.6423 | 50.1676 | 46.195  | 89.704  | 58.9794 | 95.836   | 100.315 |
| AAEL014524 | DNA replication licensing factor MCM4                         | 6.37336 | 6.63384 | 13.0242 | 15.1626 | 2.8449  | 2.80821 | 1.13502  | 6.4552  |
| AAEL002810 | DNA replication licensing factor MCM5                         | 107.237 | 61.231  | 80.6554 | 79.3061 | 27.5616 | 27.7872 | 7.47875  | 91.1537 |
| AAEL012546 | DNA replication licensing factor MCM6                         | 44.7204 | 39.9632 | 53.7582 | 57.7663 | 10.5274 | 11.1543 | 5.81464  | 23.6017 |
| AAEL000999 | DNA replication licensing factor MCM7                         | 90.6975 | 87.8161 | 108.503 | 127.264 | 44.185  | 42.1451 | 8.38969  | 51.7741 |
| AAEL002551 | DNA topoisomerase type I                                      | 110.251 | 111.801 | 88.7431 | 102.611 | 90.3311 | 87.61   | 54.562   | 74.2353 |
| AAEL012584 | DNA topoisomerase/gyrase                                      | 110.96  | 109.298 | 74.3439 | 89.6259 | 111.387 | 108.492 | 37.2816  | 61.329  |
| AAEL009395 | DNA-binding protein smubp-2                                   | 20.9502 | 21.9    | 31.2838 | 31.1572 | 23.7282 | 29.3873 | 0.462533 | 10.1129 |
| AAEL009404 | DNA-binding protein smubp-2                                   | 1.82122 | 2.04642 | 2.84302 | 2.43784 | 12.2219 | 11.5736 | 72.7104  | 24.595  |
| AAEL009411 | DNA-binding protein smubp-2                                   | 31.7432 | 31.3586 | 50.351  | 42.9779 | 17.225  | 18.299  | 0.598095 | 18.3674 |
| AAEL001831 | DNA-directed RNA polymerase II                                | 44.7645 | 44.0061 | 56.8451 | 44.195  | 65.5211 | 63.665  | 37.6973  | 43.9374 |
| AAEL011087 | DNA-directed RNA polymerase II                                | 40.3545 | 36.3654 | 54.0339 | 49.1154 | 33.5206 | 34.8193 | 24.8285  | 35.38   |
| AAEL008755 | DNA-directed RNA polymerase II subunit                        | 29.4093 | 29.6433 | 37.8564 | 33.2875 | 19.8579 | 20.8702 | 7.51292  | 17.3808 |
| AAEL007496 | DNA-directed RNA polymerase III, 62-kS-subunit, putative      | 22.6467 | 24.1543 | 27.3637 | 24.9984 | 28.2856 | 29.7953 | 4.94679  | 12.538  |
| AAEL003552 | DNA-directed RNA polymerase subunit rpb6                      | 96.5175 | 100.916 | 130.079 | 93.5209 | 97.8051 | 104.427 | 42.9374  | 66.1955 |
| AAEL000677 | DNA-directed RNA polymerase subunit rpb8                      | 27.7281 | 31.6712 | 42.1906 | 32.2519 | 33.5042 | 34.1814 | 10.8603  | 24.1531 |
| AAEL013114 | DNA-J, putative                                               | 39.7524 | 42.5553 | 35.3139 | 23.8252 | 17.8787 | 17.2099 | 20.4486  | 30.5807 |
| AAEL003588 | DNA-J/hsp40                                                   | 57.3401 | 55.3102 | 45.9893 | 48.2527 | 24.0506 | 23.0387 | 48.4335  | 57.0581 |
| AAEL010227 | dolichol-phosphate mannosyltransferase                        | 35.6808 | 61.4313 | 18.6134 | 21.8851 | 11.3135 | 12.9167 | 34.5848  | 38.4285 |
| AAEL002174 | dolichyl-diphosphooligosaccharide protein glycosyltransferase | 76.8373 | 98.3491 | 34.1252 | 32.1971 | 36.1687 | 37.6734 | 66.0716  | 70.0486 |
| AAEL000064 | dopachrome-conversion enzyme (DCE) isoenzyme, putative        | 43.8635 | 41.263  | 74.753  | 48.8827 | 68.0042 | 54.5936 | 1.5093   | 25.3984 |
| AAEL000024 | dopachrome-conversion enzyme (DCE), putative                  | 19.9686 | 18.0133 | 11.0386 | 4.84592 | 29.1445 | 22.4467 | 1.38035  | 7.63285 |
| AAEL008171 | double-stranded RNA-binding protein zn72d                     | 65.6139 | 69.9151 | 68.0228 | 65.9499 | 62.7135 | 64.3477 | 47.9759  | 59.3309 |
| AAEL011118 | dual specificity protein kinase                               | 15.1473 | 13.4943 | 22.4209 | 20.1556 | 15.0338 | 14.312  | 4.99384  | 10.981  |
| AAEL010411 | dual specificity protein phosphatase                          | 21.6646 | 19.2086 | 32.3897 | 33.5449 | 22.5374 | 17.8984 | 63.5125  | 30.0908 |
| AAEL001504 | Dual specificity tyrosine-phosphorylation-regulated kinase    | 7.80199 | 5.14066 | 5.49851 | 5.97232 | 6.74037 | 3.47415 | 96.8004  | 43.1967 |

|            |                                                               |          |          |          |          |          |          |          |          |
|------------|---------------------------------------------------------------|----------|----------|----------|----------|----------|----------|----------|----------|
| AAEL004437 | dual-specificity protein phosphatase, putative                | 25.8763  | 24.6221  | 35.6525  | 29.609   | 37.4987  | 37.0732  | 6.13305  | 13.1263  |
| AAEL007563 | DUOX                                                          | 31.563   | 31.7145  | 31.6735  | 42.9531  | 27.7258  | 30.0873  | 0.461091 | 14.6599  |
| AAEL007288 | dynammin                                                      | 30.0559  | 30.3754  | 27.0272  | 30.0009  | 28.3283  | 28.7239  | 97.7776  | 50.2362  |
| AAEL000026 | dynein light chain, putative                                  | 17.7011  | 20.998   | 36.7759  | 34.9074  | 14.9619  | 17.3062  | 4.58025  | 13.09    |
| AAEL005343 | dystrobrevin                                                  | 22.5311  | 17.2939  | 31.6011  | 32.5071  | 15.1046  | 31.4166  | 29.4692  | 43.0437  |
| AAEL000903 | e(y)2                                                         | 42.6628  | 50.2772  | 98.9911  | 55.1326  | 55.7427  | 51.7584  | 37.0068  | 33.3545  |
| AAEL001440 | Ela binding protein P400                                      | 60.8681  | 0        | 0        | 76.1761  | 47.9384  | 48.7943  | 0        | 36.6516  |
| AAEL000327 | E78                                                           | 10.9617  | 9.83027  | 16.2937  | 14.9745  | 9.17335  | 8.87194  | 0.381277 | 3.67123  |
| AAEL000293 | ebna2 binding protein P100                                    | 153.633  | 181.981  | 76.923   | 85.7017  | 95.1723  | 91.1904  | 137.96   | 150.113  |
| AAEL002130 | ecdysone inducible protein L2, putative                       | 37.523   | 31.9218  | 19.0782  | 40.0413  | 29.6297  | 25.3638  | 68.5442  | 28.1699  |
| AAEL010719 | ecdysone receptor A isoform, putative                         | 12.0852  | 13.2227  | 16.3607  | 14.0347  | 18.1425  | 17.9967  | 2.33662  | 10.3573  |
| AAEL010717 | ecdysone receptor isoform-B (EcRB)                            | 21.6805  | 16.141   | 22.8889  | 19.8393  | 20.35    | 17.8379  | 11.2824  | 17.2937  |
| AAEL000741 | ecdysone-induced protein 74EF (ETS transcription factor E74A) | 8.67705  | 8.5406   | 4.71581  | 21.2539  | 4.13139  | 2.5504   | 15.5852  | 10.2064  |
| AAEL009600 | ECR                                                           | 22.1848  | 23.2184  | 27.6837  | 24.1961  | 25.9487  | 25.1209  | 7.59585  | 15.4368  |
| AAEL006851 | eIF3g                                                         | 39.488   | 60.4902  | 45.5963  | 33.802   | 77.8756  | 98.6759  | 53.6403  | 43.4689  |
| AAEL002334 | eIF3-S6                                                       | 151.758  | 159.153  | 142.702  | 121.537  | 305.514  | 304.592  | 142.816  | 144.537  |
| AAEL011954 | elongase, putative                                            | 0        | 0        | 0.352695 | 26.1444  | 0        | 0        | 0.475727 | 0.560659 |
| AAEL013649 | elongase, putative                                            | 1.70347  | 1.20543  | 3.84339  | 30.9565  | 0.741684 | 0.480662 | 6.04831  | 3.8398   |
| AAEL007216 | elongase, putative                                            | 45.1316  | 24.5867  | 3.46268  | 15.0594  | 6.98504  | 6.99604  | 2.68097  | 17.4913  |
| AAEL008004 | elongase, putative                                            | 25.8781  | 27.1612  | 102.203  | 243.323  | 18.6559  | 16.9852  | 12.3751  | 18.8256  |
| AAEL011951 | elongase, putative                                            | 0.098208 | 0.231908 | 61.1803  | 665.854  | 0.087747 | 0.23198  | 0.201682 | 0        |
| AAEL003977 | elongase, putative                                            | 44.5622  | 45.175   | 5.65454  | 3.44746  | 12.113   | 10.1727  | 1.77119  | 24.7996  |
| AAEL009574 | elongase, putative                                            | 35.784   | 30.4455  | 21.3547  | 28.7781  | 31.8807  | 32.6641  | 66.9763  | 30.8232  |
| AAEL013128 | elongase, putative                                            | 84.164   | 82.7007  | 42.084   | 50.3979  | 75.244   | 74.07    | 31.5944  | 49.9028  |
| AAEL009571 | elongase, putative                                            | 54.6974  | 51.6662  | 144.109  | 285.598  | 36.1158  | 36.2072  | 14.0949  | 31.9343  |
| AAEL012402 | elongase, putative                                            | 3.12057  | 3.44041  | 3.05007  | 15.7016  | 5.46431  | 5.699    | 6.78794  | 3.87744  |
| AAEL002662 | elongase, putative                                            | 41.2335  | 33.3222  | 0.517018 | 2.09781  | 1.99332  | 1.22842  | 0.139038 | 18.0494  |
| AAEL002673 | elongase, putative                                            | 43.9746  | 36.0031  | 0.769478 | 0.737519 | 3.06473  | 3.93924  | 1.02092  | 26.693   |
| AAEL004947 | elongase, putative                                            | 13.3666  | 3.20066  | 4.52838  | 115.841  | 0.388071 | 0.328473 | 7.43067  | 6.71044  |
| AAEL009313 | elongation factor -1 beta, delta                              | 220.649  | 243.664  | 290.361  | 205.971  | 469.873  | 469.563  | 124.244  | 171.642  |
| AAEL011288 | elongation factor 1 gamma                                     | 471.768  | 506.396  | 374.241  | 321.961  | 1344.45  | 1302.54  | 567.638  | 467.551  |
| AAEL000951 | elongation factor 1-beta2                                     | 431.78   | 459.597  | 262.835  | 219.219  | 983.286  | 1047.04  | 497.136  | 515.418  |
| AAEL014536 | embryonic ectoderm development protein                        | 27.2995  | 25.3814  | 36.7812  | 33.4984  | 29.1614  | 31.3995  | 3.77691  | 16.0416  |

|            |                                                                            |         |         |         |         |         |         |          |         |
|------------|----------------------------------------------------------------------------|---------|---------|---------|---------|---------|---------|----------|---------|
| AAELO09189 | encore protein                                                             | 25.3855 | 24.6274 | 23.3034 | 25.3712 | 25.9842 | 27.4695 | 1.47692  | 14.4386 |
| AAELO03906 | endonuclease iii                                                           | 7.99057 | 7.68862 | 14.216  | 12.9584 | 10.1902 | 10.3618 | 0.183985 | 5.59062 |
| AAELO14052 | endoplasmic reticulum protein erp29                                        | 31.4283 | 29.1623 | 1.9209  | 1.52131 | 4.04628 | 4.04446 | 5.24771  | 16.9836 |
| AAELO11121 | endoplasmic reticulumsident kdel protein                                   | 12.7122 | 11.371  | 13.7891 | 13.6924 | 10.5502 | 11.7947 | 1.5042   | 6.24328 |
| AAELO09629 | endoU protein, putative                                                    | 15.7731 | 15.5615 | 33.7748 | 26.4637 | 113.911 | 117.583 | 1.93704  | 10.3882 |
| AAELO12057 | enhancer of polycomb                                                       | 35.8528 | 35.1266 | 58.2539 | 52.7475 | 23.0345 | 23.0703 | 5.27799  | 19.6228 |
| AAELO13213 | enhancer of zeste, ezh                                                     | 10.6308 | 8.89475 | 15.5293 | 15.5767 | 5.56176 | 4.80996 | 2.32929  | 9.30013 |
| AAELO09846 | Enn protein, putative                                                      | 18.9279 | 19.6752 | 31.1065 | 31.0815 | 14.1244 | 13.9119 | 3.06407  | 11.538  |
| AAELO01668 | enolase                                                                    | 215.312 | 212.197 | 281.961 | 257.278 | 210.859 | 215.178 | 406.187  | 248.603 |
| AAELO00109 | enolase-phosphatase e-1                                                    | 495.353 | 526.155 | 1026.85 | 659.959 | 640.932 | 600.054 | 102.943  | 307.065 |
| AAELO06342 | epoxide hydrolase                                                          | 6.06724 | 11.3218 | 5.13887 | 3.01483 | 21.852  | 18.9628 | 277.378  | 140.301 |
| AAELO06354 | epoxide hydrolase                                                          | 6.49537 | 8.1212  | 12.4393 | 11.7642 | 9.88621 | 7.69347 | 0.428002 | 4.51876 |
| AAELO05926 | er lumen protein retaining receptor                                        | 60.1107 | 61.1044 | 38.0246 | 44.9655 | 88.9803 | 77.2655 | 9.73756  | 32.6373 |
| AAELO08434 | er lumen protein retaining receptor                                        | 20.8442 | 14.9346 | 13.4414 | 10.6532 | 11.3634 | 13.9365 | 30.4939  | 9.01028 |
| AAELO02086 | er lumen protein retaining receptor                                        | 77.1062 | 86.379  | 62.02   | 59.4767 | 56.5122 | 49.8027 | 91.2933  | 92.2428 |
| AAELO07023 | estradiol 17 beta-dehydrogenase                                            | 86.4968 | 82.1669 | 48.1737 | 57.0183 | 66.6694 | 64.0072 | 659.552  | 321.568 |
| AAELO13546 | estrogenlated receptor (ERR)                                               | 24.5703 | 25.1079 | 33.7029 | 31.7232 | 25.5202 | 28.1926 | 5.71914  | 14.4466 |
| AAELO05651 | ethanolamine-phosphate<br>cytidyltransferase                               | 188.065 | 169.959 | 91.0703 | 88.4162 | 106.388 | 80.9381 | 126.126  | 122.026 |
| AAELO10488 | ets                                                                        | 7.46265 | 6.44713 | 9.64068 | 28.6281 | 9.67279 | 8.25231 | 14.2809  | 8.71792 |
| AAELO07945 | eukaryotic translation initiation factor 3<br>subunit                      | 140.839 | 139.857 | 115.197 | 93.1772 | 310.839 | 311.721 | 220.818  | 157.074 |
| AAELO12279 | eukaryotic translation initiation factor 3<br>subunit 1 (eIF-3 alpha)      | 114.211 | 130.035 | 154.742 | 126.464 | 61.5575 | 56.4334 | 165.839  | 125.873 |
| AAELO09101 | eukaryotic translation initiation factor<br>3f, eif3f                      | 166.428 | 166.721 | 123.561 | 93.7901 | 332.254 | 335.05  | 188.545  | 165.565 |
| AAELO01916 | eukaryotic translation initiation factor<br>4e                             | 223.101 | 230.361 | 289.061 | 257.692 | 208.761 | 193.55  | 135.588  | 148.542 |
| AAELO01864 | Eukaryotic translation initiation factor<br>4E binding protein (4EBP)      | 56.1386 | 54.7477 | 129.209 | 113.129 | 162.667 | 153.511 | 127.015  | 55.9004 |
| AAELO05796 | eukaryotic translation initiation factor<br>4e type                        | 82.2134 | 78.4378 | 128.887 | 111.72  | 68.8749 | 75.4516 | 39.7768  | 62.2813 |
| AAELO06209 | exonuclease                                                                | 14.5995 | 13.9807 | 23.0324 | 17.6726 | 11.9764 | 11.2341 | 1.97264  | 6.87598 |
| AAELO05851 | exosome complex exonuclease rrp42<br>(ribosomal RNA processing protein 42) | 30.3428 | 27.6976 | 21.4005 | 25.249  | 27.9933 | 32.5998 | 5.84092  | 13.4737 |

|            |                                                                |          |          |          |         |          |          |          |         |
|------------|----------------------------------------------------------------|----------|----------|----------|---------|----------|----------|----------|---------|
| AAELO09588 | expressed protein (HR3)                                        | 58.8275  | 55.0406  | 2.44735  | 1.98053 | 0.579328 | 0.528008 | 53.2582  | 56.9984 |
| AAELO01302 | expressed protein (HR39)                                       | 21.9393  | 36.7577  | 68.9343  | 92.3365 | 19.8452  | 24.707   | 16.4766  | 23.0311 |
| AAELO07212 | expressed protein (HR96)                                       | 9.46787  | 10.0765  | 21.3855  | 21.3237 | 19.3231  | 16.2465  | 90.6624  | 36.7399 |
| AAELO02184 | f-actin capping protein beta subunit                           | 36.926   | 36.8904  | 40.7434  | 37.2927 | 22.9841  | 22.3273  | 161.851  | 80.7628 |
| AAELO03453 | failed axon connections protein, putative                      | 35.7359  | 36.7426  | 35.221   | 28.0808 | 33.6216  | 35.6657  | 18.1624  | 27.4464 |
| AAELO07042 | far upstream (fuse) binding protein                            | 131.968  | 144.15   | 96.1248  | 112.448 | 107.196  | 102.41   | 67.9652  | 85.8865 |
| AAELO03497 | farnesyl-pyrophosphate synthetase                              | 75.3569  | 79.6183  | 61.9289  | 76.0556 | 70.1021  | 69.8976  | 567.733  | 288.709 |
| AAELO03579 | FAS-associated factor 1, putative                              | 24.8908  | 25.7995  | 30.0486  | 32.6848 | 20.2207  | 20.2508  | 17.1506  | 27.6618 |
| AAELO04287 | fas-associated protein                                         | 72.789   | 49.722   | 39.7709  | 45.9789 | 27.0605  | 33.7415  | 55.0954  | 39.6178 |
| AAELO13808 | fascin                                                         | 54.9018  | 48.381   | 78.615   | 78.3361 | 27.2109  | 26.5089  | 3.97146  | 24.3162 |
| AAELO04452 | fast myosin heavy chain HCIII, putative                        | 81.1228  | 86.1516  | 106.489  | 101.213 | 60.4399  | 66.8601  | 46.9715  | 57.4218 |
| AAELO03203 | fatty acid desaturase, putative                                | 275.851  | 266.189  | 104.084  | 88.077  | 557.811  | 564.872  | 950.503  | 604.461 |
| AAELO03831 | fatty acid hydroxylase                                         | 0.380064 | 0.622139 | 0.769967 | 0.98622 | 4.14997  | 1.57248  | 427.183  | 162.032 |
| AAELO01194 | fatty acid synthase                                            | 148.921  | 123.799  | 110.689  | 132.013 | 231.6    | 243.598  | 78.0912  | 106.869 |
| AAELO02228 | fatty acid synthase                                            | 12.728   | 14.388   | 13.9416  | 13.2079 | 44.4437  | 38.5053  | 0.077849 | 4.21461 |
| AAELO02227 | fatty acid synthase                                            | 8.7376   | 8.31912  | 7.68674  | 7.82162 | 15.261   | 13.5556  | 0.125588 | 3.43601 |
| AAELO03371 | f-box and wd-40 domain protein                                 | 61.6336  | 58.65    | 95.718   | 80.9782 | 60.27    | 58.4684  | 27.6734  | 39.5451 |
| AAELO11215 | f-box and wd40 domain protein 7 (fbw7)                         | 25.0293  | 24.8524  | 51.9059  | 53.3198 | 22.1662  | 24.0517  | 6.83589  | 14.9378 |
| AAELO04875 | f-box only protein                                             | 38.5058  | 38.2009  | 51.3939  | 49.0694 | 41.0941  | 38.117   | 13.0372  | 22.0594 |
| AAELO07385 | ferritin subunit 1, putative                                   | 426.873  | 438.235  | 653.399  | 586.325 | 586.517  | 550.719  | 16710.7  | 7091.37 |
| AAELO10248 | fibrillarin                                                    | 56.1673  | 61.7061  | 44.9895  | 45.1794 | 50.7601  | 46.9025  | 7.19396  | 27.5032 |
| AAELO00549 | fibulin 1 and                                                  | 0.191711 | 0.058313 | 0.331378 | 0.21373 | 0.635152 | 1.2164   | 145.32   | 60.9282 |
| AAELO02539 | fimbrin/plastin                                                | 13.0042  | 11.9885  | 10.6205  | 13.651  | 15.694   | 14.3958  | 324.643  | 126.295 |
| AAELO11632 | fk506 binding protein                                          | 28.9957  | 28.8303  | 62.4457  | 46.7805 | 35.0439  | 35.8262  | 7.81378  | 19.2977 |
| AAELO04313 | fk506-binding protein                                          | 152.224  | 224.999  | 3.82671  | 2.74099 | 117.456  | 110.144  | 150.767  | 176.767 |
| AAELO08367 | fk506-binding protein                                          | 42.7574  | 67.5628  | 17.2781  | 15.0457 | 24.3144  | 26.1062  | 37.2555  | 43.1144 |
| AAELO07883 | fk506-binding protein                                          | 170.508  | 197.203  | 199.859  | 174.543 | 128.204  | 125.327  | 179.33   | 174.587 |
| AAELO08958 | forkhead box protein (AaegFOXK1)                               | 74.831   | 77.0082  | 104.486  | 96.5747 | 79.5901  | 79.9766  | 36.8177  | 57.4008 |
| AAELO05731 | forkhead box protein (AaegFOXL)                                | 63.6585  | 52.4966  | 30.1331  | 31.1859 | 65.9127  | 61.5057  | 0.38283  | 27.183  |
| AAELO09900 | forkhead box protein (AaegFOXN2)                               | 36.479   | 39.6099  | 52.0514  | 47.3065 | 42.4063  | 43.5304  | 1.79518  | 19.4693 |
| AAELO14953 | forkhead box protein (AaegFOXO)                                | 61.3426  | 36.7483  | 68.249   | 61.3273 | 82.1431  | 63.5634  | 22.3293  | 52.6943 |
| AAELO03162 | formin 1,2/cappuccino                                          | 34.9295  | 32.3102  | 58.5297  | 51.0837 | 30.2772  | 29.5725  | 5.69638  | 21.0016 |
| AAELO01946 | four and a half lim domains                                    | 33.8771  | 32.6314  | 58.9568  | 35.8233 | 22.484   | 23.5853  | 51.6911  | 38.8111 |
| AAELO09326 | fragile X mental retardation syndromelated protein 1, putative | 37.4508  | 36.794   | 36.6728  | 34.8979 | 25.4551  | 25.2305  | 15.7753  | 22.2764 |

|            |                                                          |          |          |          |          |          |          |          |         |
|------------|----------------------------------------------------------|----------|----------|----------|----------|----------|----------|----------|---------|
| AAELO08646 | FREP10                                                   | 10.5715  | 13.5298  | 8.82286  | 15.7202  | 18.0602  | 33.1618  | 23.3313  | 15.1322 |
| AAELO07942 | FREP14                                                   | 0.138982 | 0        | 0.103623 | 0.476286 | 0.829964 | 0.971273 | 292.798  | 159.535 |
| AAELO06704 | FREP18                                                   | 1.6172   | 0.068677 | 3.28838  | 5.30819  | 18.6785  | 31.7527  | 3143.42  | 1286.33 |
| AAELO06691 | FREP21                                                   | 0        | 0        | 0.112994 | 0.173948 | 0.627629 | 0.824897 | 197.46   | 111.805 |
| AAELO03294 | FREP3                                                    | 26.3632  | 24.7298  | 1.14684  | 1.6412   | 2.12542  | 2.4862   | 2.46422  | 12.2444 |
| AAELO06699 | FREP34                                                   | 0.095404 | 0.1126   | 0.184732 | 0.255671 | 3.94625  | 1.60969  | 169.058  | 84.7983 |
| AAELO11400 | FREP36                                                   | 19.5417  | 22.7783  | 13.7396  | 12.5416  | 35.9064  | 32.2341  | 0.154572 | 6.04485 |
| AAELO11007 | FREP37                                                   | 0.377    | 0.31723  | 0.517572 | 0.55057  | 1.46562  | 1.96242  | 73.8202  | 34.3819 |
| AAELO04156 | FREP9                                                    | 1.87661  | 1.94737  | 2.45431  | 3.85839  | 17.8931  | 13.4776  | 606.46   | 252.965 |
| AAELO01158 | fructose-1,6-bisphosphatase                              | 94.3256  | 101.668  | 152.194  | 136.487  | 85.0668  | 85.913   | 16.0319  | 63.4679 |
| AAELO05766 | fructose-bisphosphate aldolase                           | 361.398  | 355.971  | 852.5    | 657.591  | 218.441  | 224.21   | 453.717  | 376.351 |
| AAELO06301 | fruitless                                                | 28.4887  | 25.9774  | 38.8907  | 40.1611  | 43.4321  | 42.2452  | 10.163   | 16.9456 |
| AAELO07889 | f-spondin                                                | 17.435   | 23.6443  | 9.88091  | 8.47619  | 23.9324  | 23.2587  | 3.09162  | 12.0441 |
| AAELO03413 | f-spondin                                                | 40.2696  | 43.9648  | 13.5804  | 8.62217  | 59.8893  | 60.7908  | 1.62881  | 13.9819 |
| AAELO11973 | fumarylacetoacetate hydrolase                            | 46.201   | 44.0554  | 53.3359  | 67.8606  | 35.416   | 40.1345  | 5.533    | 35.8919 |
| AAELO04722 | GABA-A receptor interacting factor-1, putative           | 42.5006  | 38.3412  | 44.3482  | 45.9543  | 40.4683  | 41.3333  | 127.716  | 65.1162 |
| AAELO02781 | galactokinase                                            | 22.5817  | 24.2607  | 22.6174  | 25.8049  | 37.2711  | 35.1161  | 182.319  | 87.8555 |
| AAELO01607 | galactose-1-phosphate uridylyltransferase                | 125.518  | 163.889  | 17.6239  | 15.0406  | 27.8816  | 25.2301  | 114.903  | 126.644 |
| AAELO09842 | GALE12                                                   | 5.48747  | 6.07857  | 6.88209  | 14.0179  | 46.7361  | 12.2741  | 459.574  | 223.576 |
| AAELO12135 | GALE2                                                    | 0.136293 | 0.079623 | 0.356722 | 0.311955 | 2.91866  | 1.86576  | 225.778  | 76.6082 |
| AAELO03844 | GALE5                                                    | 28.3501  | 22.8863  | 35.2588  | 38.9559  | 147.17   | 120.563  | 641.786  | 210.874 |
| AAELO05293 | GALE8A                                                   | 0.03921  | 0.047552 | 0.136661 | 0.197208 | 1.23489  | 2.08764  | 423.935  | 161.78  |
| AAELO04522 | GAM1                                                     | 1.09613  | 0.048904 | 3.4255   | 2.89649  | 2.97939  | 29.1755  | 1085.42  | 696.837 |
| AAELO15561 | gamma glutamyl transpeptidases                           | 2.0879   | 2.17959  | 8.20674  | 1.40396  | 0.887283 | 1.58647  | 3.00432  | 3.90681 |
| AAELO14580 | gamma glutamyl transpeptidases                           | 14.5215  | 14.1601  | 20.375   | 5.38836  | 13.0255  | 14.6821  | 4.12007  | 9.58114 |
| AAELO00271 | gamma-glutamyl hydrolase, putative                       | 21.5812  | 18.3133  | 12.7306  | 12.7661  | 41.1694  | 32.27    | 417.69   | 185.654 |
| AAELO00759 | gamma-glutamylcysteine synthetase, putative              | 30.9016  | 33.0472  | 29.093   | 24.5402  | 24.6109  | 23.1815  | 140.083  | 55.8172 |
| AAELO12939 | gamma-subunit, methylmalonyl-CoA decarboxylase, putative | 45.0181  | 48.3994  | 70.7594  | 59.6578  | 39.5985  | 37.9131  | 138.417  | 56.2989 |
| AAELO13903 | gamma-tubulin complex component 2 (gcp-2)                | 14.3229  | 14.2554  | 15.0699  | 15.1469  | 15.3908  | 18.0827  | 3.02859  | 7.91531 |
| AAELO13956 | ganglioside induced differentiation associated protein   | 20.1691  | 7.74971  | 14.4487  | 10.5351  | 15.6242  | 19.6884  | 41.6739  | 19.6326 |
| AAELO10218 | GATA transcription factor (GATAa)                        | 8.65539  | 10.0417  | 5.58819  | 8.29152  | 18.2321  | 12.2673  | 0        | 5.38319 |

|            |                                                              |          |          |          |          |          |          |          |          |
|------------|--------------------------------------------------------------|----------|----------|----------|----------|----------|----------|----------|----------|
| AAEL006447 | GATA transcription factor (GATAB)                            | 13.9941  | 13.8034  | 15.7695  | 16.9167  | 19.3759  | 18.3476  | 1.39659  | 6.46368  |
| AAEL010225 | GATA transcription factor (GATAc)                            | 0.75897  | 0        | 0        | 0        | 2.77775  | 0        | 128.448  | 35.9889  |
| AAEL005947 | Gch sequence factor-1, putative                              | 117.773  | 131.761  | 98.8619  | 94.4672  | 73.2074  | 71.8661  | 64.9139  | 85.1101  |
| AAEL006102 | Gelsolin precursor                                           | 20.6938  | 19.684   | 18.6285  | 17.6314  | 72.7869  | 83.7732  | 2.21769  | 9.70993  |
| AAEL006096 | Gelsolin precursor                                           | 34.4736  | 41.2539  | 39.9548  | 37.2645  | 159.417  | 147.678  | 7.37279  | 19.8067  |
| AAEL009773 | geminin, putative                                            | 46.6115  | 44.9952  | 85.3845  | 58.7527  | 35.7267  | 33.5739  | 2.80691  | 21.8801  |
| AAEL007474 | geminin, putative                                            | 16.3438  | 15.5843  | 24.6254  | 17.2688  | 13.4942  | 12.7188  | 1.07619  | 7.30675  |
| AAEL005925 | geranylgeranyl pyrophosphate synthase                        | 0        | 0        | 9.83949  | 47.5108  | 0.079781 | 0        | 0.149878 | 0        |
| AAEL000856 | germ cell-less protein                                       | 80.1847  | 96.2094  | 69.6913  | 142.495  | 145.598  | 149.959  | 21.4109  | 106.979  |
| AAEL009055 | gliotactin                                                   | 2.63495  | 2.36214  | 2.11197  | 1.94937  | 1.11941  | 1.10889  | 50.0992  | 19.2493  |
| AAEL013877 | glucosamine-6-phosphate isomerase                            | 82.3127  | 72.8013  | 140.168  | 122.101  | 30.6761  | 34.1517  | 413.624  | 231.166  |
| AAEL009510 | glucosamine-fructose-6-phosphate aminotransferase            | 8.35608  | 13.7614  | 9.24799  | 38.2702  | 7.58236  | 7.7845   | 355.495  | 149.422  |
| AAEL005705 | glucosaminophosphotransferase                                | 29.0363  | 51.8802  | 12.6474  | 11.3944  | 13.8749  | 14.5026  | 22.8709  | 33.8174  |
| AAEL004025 | glucose dehydrogenase                                        | 34.2184  | 26.2606  | 28.4214  | 29.2234  | 32.5042  | 31.2791  | 216.714  | 98.8748  |
| AAEL011809 | glucose dehydrogenase                                        | 0.212167 | 0.150492 | 43.8469  | 17.6171  | 0.717809 | 0.39958  | 0.206984 | 0.247033 |
| AAEL004028 | glucose dehydrogenase                                        | 9.56958  | 6.93327  | 1.30409  | 3.61829  | 1.22862  | 1.00577  | 0.05962  | 3.21574  |
| AAEL005769 | glucose dehydrogenase                                        | 14.1875  | 19.107   | 5.62609  | 8.90387  | 26.8519  | 25.3995  | 2.89103  | 8.482    |
| AAEL009207 | glucose dehydrogenase                                        | 0        | 0        | 18.4634  | 85.0024  | 0        | 0.028049 | 0.063828 | 0        |
| AAEL011808 | glucose dehydrogenase                                        | 0        | 0        | 3.03456  | 28.6953  | 0        | 0        | 0        | 0        |
| AAEL002292 | glucose transport protein, putative                          | 0.078359 | 0.368688 | 0.282226 | 0.291761 | 7.89886  | 1.03624  | 156.528  | 61.5323  |
| AAEL006274 | glucose transporter (sugar transporter)                      | 0.991036 | 0.745517 | 0.729482 | 1.08707  | 1.46924  | 1.48468  | 168.357  | 88.9837  |
| AAEL001548 | glucosyl/glucuronosyl transferases                           | 6.78454  | 7.20274  | 4.18482  | 2.68176  | 6.74077  | 7.50307  | 263.623  | 111.231  |
| AAEL014246 | glucosyl/glucuronosyl transferases                           | 47.6222  | 64.8569  | 154.077  | 111.765  | 29.6603  | 32.5514  | 19.011   | 21.1695  |
| AAEL003076 | glucosyl/glucuronosyl transferases                           | 23.1568  | 28.7447  | 105.466  | 93.6971  | 11.6764  | 16.7555  | 261.364  | 130.819  |
| AAEL001586 | glucosyl/glucuronosyl transferases                           | 5.91158  | 5.88704  | 30.4033  | 6.0931   | 8.71318  | 8.68912  | 80.3081  | 34.6562  |
| AAEL002688 | glucosyl/glucuronosyl transferases                           | 6.14036  | 5.69174  | 9.50932  | 10.8027  | 4.21222  | 5.34769  | 87.1275  | 43.8776  |
| AAEL000687 | glucosyl/glucuronosyl transferases                           | 1.08456  | 0.67963  | 0.305904 | 0.287151 | 2.59256  | 2.16078  | 125.333  | 56.7746  |
| AAEL001816 | glucosyl/glucuronosyl transferases                           | 0.442943 | 0.130473 | 0.918842 | 0.899373 | 0.494131 | 0.925049 | 317.724  | 104.993  |
| AAEL010464 | glutamate dehydrogenase                                      | 79.6919  | 88.6478  | 63.9794  | 42.1885  | 99.1144  | 101.513  | 240.243  | 185.836  |
| AAEL006834 | glutamate semialdehyde dehydrogenase                         | 289.285  | 348.112  | 150.499  | 303.976  | 190.009  | 186.636  | 337.485  | 351.009  |
| AAEL001887 | glutamine synthetase 1, 2 (glutamate-<br>amonia ligase) (gs) | 137.731  | 182.676  | 88.5924  | 122.008  | 94.8493  | 98.3895  | 2011.62  | 1076.99  |
| AAEL013458 | glutamine synthetase 1, 2 (glutamate-<br>amonia ligase) (gs) | 155.981  | 153.791  | 414.587  | 350.243  | 112.743  | 118.868  | 56.4536  | 99.0772  |



|            |                                             |          |          |          |          |          |         |          |         |
|------------|---------------------------------------------|----------|----------|----------|----------|----------|---------|----------|---------|
| AAEL007201 | glutamyl aminopeptidase                     | 38.7937  | 39.193   | 47.4323  | 48.2631  | 42.8595  | 46.0986 | 412.823  | 223.014 |
| AAEL012238 | glutaredoxin, putative                      | 60.3369  | 67.9763  | 72.2808  | 72.368   | 46.5401  | 49.958  | 1492.31  | 757.516 |
| AAEL013980 | glutaredoxin, putative                      | 98.4046  | 102.239  | 129.432  | 100.594  | 80.8615  | 91.5295 | 355.897  | 252.037 |
| AAEL014064 | glutaredoxin, putative                      | 38.3573  | 43.7298  | 40.8078  | 38.3568  | 29.4323  | 29.2416 | 307.818  | 142.655 |
| AAEL009154 | glutathione synthetase                      | 24.0707  | 22.9615  | 26.6313  | 25.2463  | 20.4442  | 19.4    | 147.103  | 78.092  |
| AAEL006239 | glycerol kinase                             | 132.36   | 119.098  | 207.959  | 223.656  | 35.4534  | 32.1714 | 11.4716  | 66.7951 |
| AAEL007080 | glycerol-3-phosphate acyltransferase        | 23.5699  | 23.3175  | 29.1919  | 34.8646  | 38.1631  | 40.1902 | 228.557  | 118.932 |
| AAEL001593 | glycerol-3-phosphate dehydrogenase          | 228.735  | 201.293  | 515.174  | 509.007  | 91.984   | 91.2918 | 320.326  | 306.696 |
| AAEL012974 | glycine cleavage system h protein           | 107.855  | 144.172  | 26.729   | 13.2081  | 96.8739  | 83.3312 | 6.58193  | 54.9516 |
| AAEL000364 | glycine cleavage system h protein           | 38.7223  | 67.1238  | 8.41185  | 7.10799  | 38.9383  | 31.6574 | 2.61035  | 23.0269 |
| AAEL014426 | glycine dehydrogenase                       | 17.8362  | 43.2283  | 6.64839  | 0.830468 | 18.3785  | 13.7491 | 0.527208 | 15.9674 |
| AAEL015143 | glycine rich RNA binding protein, putative  | 203.053  | 208.58   | 196.991  | 225.974  | 154.925  | 161.467 | 34.8021  | 96.2012 |
| AAEL000703 | glycogen phosphorylase                      | 227.753  | 203.634  | 267.088  | 355.012  | 53.2051  | 55.2973 | 35.2261  | 113.91  |
| AAEL004221 | glycogen synthase                           | 76.9189  | 74.3687  | 103.251  | 101.24   | 53.5967  | 55.5335 | 23.2286  | 50.6323 |
| AAEL014863 | glycogenin                                  | 100.206  | 93.4828  | 110.936  | 148.992  | 71.4718  | 76.0995 | 19.7685  | 57.2469 |
| AAEL003094 | glycoprotein, putative                      | 0        | 0.039447 | 0.567512 | 22.9632  | 0        | 0       | 0.153677 | 0       |
| AAEL000559 | glycosyl transferase                        | 28.4276  | 40.8901  | 11.2672  | 13.9379  | 19.882   | 20.6427 | 18.7375  | 25.1062 |
| AAEL007982 | glycosyltransferase                         | 11.693   | 9.37167  | 10.3779  | 9.29142  | 4.89257  | 4.37287 | 2.39565  | 7.03015 |
| AAEL000004 | glycosyltransferase                         | 38.4754  | 41.3158  | 23.2973  | 20.0629  | 28.003   | 28.4261 | 15.9203  | 28.939  |
| AAEL004532 | glyoxylate/hydroxypyruvate reductase        | 31.1993  | 26.4969  | 97.5608  | 88.9421  | 19.8914  | 23.1363 | 183.567  | 100.028 |
| AAEL003889 | GNBPB1                                      | 8.81469  | 6.01901  | 4.11017  | 3.1353   | 55.8212  | 28.8139 | 4.10992  | 2.9058  |
| AAEL009176 | GNBPB3                                      | 0.056207 | 0        | 0.124017 | 0        | 0.049874 | 0       | 128.26   | 55.5693 |
| AAEL009178 | GNBPB4                                      | 0.881194 | 1.19836  | 7.6961   | 4.94994  | 3.15691  | 3.80633 | 1285.41  | 526.139 |
| AAEL006230 | gonadotropin inducible transcription factor | 9.42713  | 7.97695  | 12.2949  | 13.2881  | 11.7393  | 9.8715  | 2.86979  | 8.30032 |
| AAEL002145 | gonadotropin inducible transcription factor | 39.4393  | 37.8799  | 59.2359  | 56.4681  | 25.9155  | 28.5576 | 8.85571  | 17.2846 |
| AAEL011325 | gonadotropinleasing hormone receptor        | 29.1676  | 31.9452  | 14.1097  | 17.1622  | 30.7695  | 28.0331 | 0.57311  | 11.8488 |
| AAEL003494 | goodpasture antigen-binding protein         | 89.2534  | 92.3968  | 146.609  | 130.755  | 82.5748  | 83.613  | 38.989   | 52.7984 |
| AAEL008126 | GPRCIR                                      | 16.0812  | 14.6844  | 10.5344  | 12.3941  | 10.6121  | 10.0784 | 0.623165 | 7.6707  |
| AAEL013160 | GPRFZ1                                      | 16.9578  | 15.7754  | 22.8932  | 22.2939  | 13.625   | 14.6032 | 2.2061   | 9.58782 |
| AAEL018033 | GPRFZ5                                      | 11.2914  | 11.0867  | 9.4145   | 12.0179  | 7.18899  | 6.7159  | 0.775503 | 4.63628 |
| AAEL015190 | GPRFZ6                                      | 7.56664  | 10.3371  | 6.11089  | 8.93485  | 4.74792  | 4.03612 | 0.327427 | 4.54901 |
| AAEL009983 | GPRFZ7                                      | 17.0497  | 16.4991  | 27.3938  | 26.9304  | 15.6116  | 15.9642 | 1.85734  | 10.0068 |
| AAEL013886 | GPRFZ9                                      | 14.1968  | 18.0483  | 12.6455  | 18.8418  | 9.24516  | 11.2033 | 1.07938  | 8.54769 |

|            |                                                |          |          |          |          |          |          |          |         |
|------------|------------------------------------------------|----------|----------|----------|----------|----------|----------|----------|---------|
| AAELO12796 | GPRGHP3                                        | 9.61758  | 6.8837   | 16.2703  | 14.0765  | 3.57566  | 3.70296  | 0.096446 | 8.75383 |
| AAELO10980 | GPRMTH2                                        | 3.4506   | 3.02949  | 1.90271  | 2.06286  | 2.62548  | 1.76406  | 46.6332  | 16.9938 |
| AAELO11521 | GPRMTH6                                        | 15.6051  | 15.672   | 25.0898  | 20.4646  | 15.4124  | 13.2828  | 132.558  | 55.1099 |
| AAELO00811 | GPRMTH7                                        | 0.979932 | 1.65914  | 4.37361  | 7.158    | 2.93099  | 1.53187  | 78.8696  | 27.1764 |
| AAELO17160 | GPRMTH9                                        | 19.4485  | 20.0156  | 23.016   | 16.8358  | 14.2971  | 15.9842  | 106.147  | 48.0732 |
| AAELO01606 | GPRMTN                                         | 48.6319  | 46.7343  | 92.3892  | 81.7239  | 55.1819  | 52.6803  | 189.805  | 77.371  |
| AAELO03448 | GPRNNA13                                       | 0        | 0.09666  | 0.673938 | 1.28568  | 0.222948 | 0.160099 | 165.089  | 30.809  |
| AAELO17549 | GPRNNA14                                       | 0        | 0        | 1.49154  | 1.17642  | 0.329549 | 0.360702 | 167.987  | 31.269  |
| AAELO07644 | GPRNNA6                                        | 0.078036 | 0.030105 | 0.112429 | 0.084526 | 0.902369 | 0.334322 | 38.2004  | 12.871  |
| AAELO03647 | GPRNPR3                                        | 34.5109  | 32.4863  | 44.8309  | 43.0427  | 32.6688  | 33.6499  | 0.425861 | 16.1367 |
| AAELO04396 | GPROAR4                                        | 23.7731  | 20.667   | 14.2494  | 18.8781  | 20.0576  | 19.8273  | 0.40805  | 4.89764 |
| AAELO06685 | G-protein, gamma-subunit, putative             | 3.00396  | 7.70858  | 3.52017  | 1.07255  | 6.00563  | 4.73388  | 452.077  | 161.878 |
| AAELO00246 | GPRSTN                                         | 10.6888  | 11.3003  | 10.5306  | 9.87511  | 7.23146  | 7.93986  | 1.40429  | 6.49815 |
| AAELO17544 | GPRTAK1_3                                      | 0        | 0        | 0        | 5.36269  | 6.17318  | 0        | 0        | 0       |
| AAELO12069 | GPXH1                                          | 25.3448  | 28.7313  | 30.8929  | 31.4973  | 30.8872  | 22.3454  | 355.3    | 139.03  |
| AAELO11571 | Gr14                                           | 13.2669  | 11.7753  | 22.0871  | 16.9473  | 13.2353  | 14.3795  | 2.75842  | 7.74628 |
| AAELO14285 | growth hormone inducible transmembrane protein | 47.2857  | 50.1337  | 62.2759  | 57.1961  | 53.9836  | 56.7029  | 130.731  | 66.6862 |
| AAELO01061 | GSTD1                                          | 897.43   | 772.011  | 1261.86  | 1332.29  | 338.924  | 372.961  | 130.369  | 411.846 |
| AAELO10582 | GSTD11                                         | 41.1254  | 38.1676  | 66.8557  | 67.7809  | 33.8708  | 34.6026  | 334.759  | 133.787 |
| AAELO01054 | GSTD4                                          | 0        | 0        | 0.071089 | 0        | 0        | 0        | 20.3691  | 6.21051 |
| AAELO11752 | GSTI1                                          | 24.1549  | 24.0124  | 25.4927  | 24.7266  | 31.0509  | 29.9601  | 25.212   | 33.4896 |
| AAELO11741 | GSTS1                                          | 6.67742  | 5.71894  | 14.0009  | 20.2659  | 15.3922  | 12.6177  | 1993.64  | 811.029 |
| AAELO04229 | GSTT4                                          | 12.1401  | 9.38805  | 5.71488  | 2.42175  | 24.0845  | 24.8458  | 259.511  | 102.005 |
| AAELO00092 | GSTX1                                          | 0.091411 | 0.314789 | 0.194914 | 0.224011 | 1.15751  | 0.63528  | 200.148  | 80.9878 |
| AAELO02261 | GTP cyclohydrolase i                           | 107.745  | 123.706  | 153.748  | 153.901  | 70.3653  | 73.6661  | 3.31083  | 43.0055 |
| AAELO06786 | gtpase_rho                                     | 39.5036  | 39.8174  | 31.6276  | 33.5629  | 53.5136  | 53.3535  | 153.464  | 73.4124 |
| AAELO13139 | gtpase_rho                                     | 158.083  | 166.108  | 217.074  | 201.167  | 93.7775  | 97.9374  | 569.421  | 351.26  |
| AAELO10506 | GTP-binding protein alpha subunit, gna         | 51.8354  | 49.3861  | 56.7759  | 61.6767  | 33.2132  | 34.0133  | 27.867   | 36.3021 |
| AAELO13123 | GTP-binding protein alpha subunit, gna         | 0.148177 | 0.306317 | 0.207615 | 0.873003 | 11.4283  | 0.73013  | 502.312  | 159.98  |
| AAELO08630 | GTP-binding protein alpha subunit, gna         | 14.8817  | 16.2805  | 11.1397  | 14.2599  | 15.1081  | 15.0266  | 2.04737  | 9.08876 |
| AAELO02160 | GTP-binding protein                            | 95.5662  | 98.9436  | 58.0927  | 56.1127  | 199.162  | 194.042  | 87.7416  | 93.3108 |
| AAELO05634 | harmonin, putative                             | 12.5303  | 12.9142  | 12.5595  | 20.0816  | 9.84025  | 10.4248  | 0.219818 | 4.94449 |
| AAELO14845 | heat shock protein                             | 105.715  | 106.251  | 138.75   | 133.543  | 141.772  | 138.087  | 38.9835  | 59.9355 |
| AAELO11704 | heat shock protein                             | 23.6436  | 35.0353  | 34.8977  | 34.789   | 13.4525  | 17.6855  | 8.75952  | 28.0101 |

|            |                                                          |          |          |          |          |          |          |          |         |
|------------|----------------------------------------------------------|----------|----------|----------|----------|----------|----------|----------|---------|
| AAELO11708 | heat shock protein                                       | 11.4459  | 18.3017  | 23.0814  | 20.3761  | 14.659   | 17.2465  | 6.29375  | 22.1229 |
| AAELO14843 | heat shock protein                                       | 161.368  | 142.846  | 296.657  | 205.745  | 85.7387  | 88.5654  | 80.5943  | 112.68  |
| AAELO13350 | heat shock protein 26kD, putative                        | 0.417291 | 0.366119 | 0.383113 | 0.795889 | 2.53605  | 0.849699 | 33.7163  | 6.96623 |
| AAELO04148 | heat shock protein 70 (hsp70)-interacting protein        | 141.332  | 139.383  | 157.132  | 133.676  | 89.8208  | 84.8201  | 217.693  | 139.373 |
| AAELO01052 | heat shock protein, putative                             | 112.753  | 132.78   | 153.572  | 137.356  | 128.101  | 122.287  | 66.0433  | 96.6186 |
| AAELO07558 | helicase                                                 | 41.796   | 42.4683  | 41.2621  | 45.0229  | 50.9923  | 48.9226  | 20.4248  | 28.6352 |
| AAELO03968 | helicase                                                 | 30.1413  | 27.8515  | 64.8474  | 55.0784  | 21.0452  | 20.4847  | 14.1456  | 21.903  |
| AAELO06331 | helicase                                                 | 19.0331  | 17.3495  | 27.7898  | 26.6407  | 14.7972  | 13.4038  | 3.02399  | 8.35923 |
| AAELO03950 | helicase                                                 | 30.1893  | 28.3105  | 97.5146  | 70.0614  | 21.4036  | 21.2755  | 0.684534 | 12.6438 |
| AAELO10472 | helix-loop-helix protein hen                             | 5.83821  | 8.56157  | 10.7502  | 7.75201  | 7.09626  | 8.11078  | 0.076142 | 3.03418 |
| AAELO08410 | helix-loop-helix transcription factor                    | 0.996237 | 0.617727 | 1.11798  | 0.818492 | 1.75704  | 1.88158  | 44.9634  | 16.4718 |
| AAELO04868 | hemomucin                                                | 5.4682   | 5.71403  | 4.79667  | 5.75586  | 8.51465  | 8.2994   | 23.7504  | 7.62198 |
| AAELO10437 | heparan n-sulfatase                                      | 27.6013  | 27.5453  | 46.1966  | 50.0781  | 22.8586  | 23.102   | 3.57054  | 18.2227 |
| AAELO13538 | hepatoma-derived GF, putative                            | 81.3503  | 83.4447  | 93.5108  | 106.502  | 63.525   | 60.6624  | 25.6511  | 55.2574 |
| AAELO05049 | heterogeneous nuclear ribonucleoprotein                  | 40.2482  | 41.8015  | 65.5364  | 55.509   | 61.1297  | 57.3564  | 0.493372 | 18.6652 |
| AAELO05515 | heterogeneous nuclear ribonucleoprotein                  | 840.689  | 872.542  | 874.706  | 816.659  | 764.281  | 757.764  | 387.887  | 565.257 |
| AAELO10467 | heterogeneous nuclear ribonucleoprotein                  | 155.813  | 166.295  | 63.2905  | 110.344  | 91.2327  | 95.0781  | 125.431  | 130.424 |
| AAELO13990 | hexamerin 2 beta                                         | 20.5019  | 16.3714  | 8.29182  | 8.74707  | 23.0857  | 21.0442  | 1.35914  | 6.62855 |
| AAELO09387 | hexokinase                                               | 94.0847  | 88.5151  | 99.784   | 127.029  | 119.066  | 108.398  | 465.102  | 219.13  |
| AAELO13263 | high affinity copper transporter, putative               | 0        | 0        | 0.118613 | 0.068873 | 0.375197 | 0.40772  | 259.973  | 126.439 |
| AAELO01421 | high density lipoprotien binding protein / vigilin       | 134.422  | 158.945  | 39.8115  | 40.0229  | 100.395  | 98.1461  | 119.492  | 122.626 |
| AAELO11380 | high mobility group B1, putative                         | 114.793  | 112.141  | 45.4829  | 61.4081  | 103.348  | 93.0663  | 27.6419  | 52.394  |
| AAELO11414 | high mobility group non-histone protein, putative        | 712.419  | 680.358  | 1355.14  | 1029.93  | 437.543  | 453.825  | 312.521  | 487.82  |
| AAELO09630 | high-affinity cgmp-specific 3,5-cyclic phosphodiesterase | 3.0317   | 2.46298  | 5.99876  | 6.71865  | 22.5756  | 19.2645  | 33.2083  | 11.8855 |
| AAELO06177 | histone acetyltransferase type b catalytic subunit       | 92.3097  | 85.8616  | 152.501  | 160.343  | 61.1474  | 65.1888  | 16.6577  | 52.3923 |
| AAELO04586 | histone deacetylase                                      | 120.138  | 114.27   | 212.317  | 175.983  | 105.927  | 100.841  | 128.116  | 95.1292 |
| AAELO10638 | histone H1, putative                                     | 37.9809  | 32.0816  | 136.247  | 113.352  | 15.2525  | 15.2301  | 0.448513 | 20.5065 |
| AAELO02103 | histone H1, putative                                     | 69.3417  | 73.0305  | 63.8021  | 67.0079  | 81.5138  | 78.5006  | 0.746958 | 36.135  |
| AAELO07882 | histone H1, putative                                     | 20.0886  | 20.5394  | 19.4256  | 18.6658  | 31.5285  | 31.8783  | 6.14773  | 12.1622 |
| AAELO07609 | histone h2a                                              | 698.976  | 688.322  | 851.177  | 816.732  | 411.188  | 405.701  | 132.756  | 405.487 |

|            |                                                         |         |         |         |         |         |          |          |         |
|------------|---------------------------------------------------------|---------|---------|---------|---------|---------|----------|----------|---------|
| AAELO03862 | histone h2a                                             | 44.1695 | 44.0198 | 144.697 | 115.606 | 12.0547 | 17.6756  | 3.49712  | 21.3888 |
| AAELO12499 | histone h2a                                             | 207.897 | 168.855 | 857.674 | 746.175 | 49.959  | 56.0888  | 8.43925  | 104.726 |
| AAELO03669 | histone h2a                                             | 19.2038 | 10.0337 | 109.029 | 87.8368 | 10.9527 | 10.2862  | 0.560132 | 7.82025 |
| AAELO15683 | histone H2B                                             | 4.49822 | 4.83594 | 22.9975 | 12.6351 | 3.50827 | 2.49026  | 0        | 3.19773 |
| AAELO15684 | histone H2B                                             | 16.4742 | 11.7226 | 71.9551 | 55.706  | 9.75904 | 9.30525  | 0.199043 | 6.06962 |
| AAELO15682 | histone H2B                                             | 60.3395 | 41.9439 | 350.174 | 257.98  | 66.5495 | 54.0005  | 0.518904 | 28.4604 |
| AAELO03685 | histone H3                                              | 36.544  | 25.7887 | 107.954 | 93.9566 | 43.5937 | 38.1034  | 0        | 17.8676 |
| AAELO03659 | histone H3                                              | 131.983 | 98.9819 | 387.349 | 301.844 | 135.301 | 115.559  | 0.513265 | 58.868  |
| AAELO11424 | histone H3                                              | 310.883 | 278.031 | 609.18  | 578.034 | 144.873 | 136.068  | 9.21884  | 202.912 |
| AAELO06783 | histone h3 methyltransferase                            | 31.2776 | 34.6021 | 52.856  | 43.9186 | 32.1132 | 35.2875  | 7.36357  | 18.1374 |
| AAELO03673 | histone H4                                              | 16.6874 | 13.2486 | 97.8446 | 78.018  | 19.2062 | 17.3831  | 0        | 7.71015 |
| AAELO03689 | histone H4                                              | 45.825  | 41.6225 | 183.515 | 158.772 | 77.7703 | 70.2513  | 1.55468  | 29.8723 |
| AAELO13709 | histone H4                                              | 2.82122 | 0       | 1.93907 | 0       | 1.49983 | 0.655327 | 6.49625  | 0       |
| AAELO01764 | histone-fold protein CHRAC subunit, putative            | 48.7546 | 45.392  | 56.9967 | 48.3663 | 30.1083 | 30.128   | 17.905   | 36.8493 |
| AAELO00193 | histone-lysine n-methyltransferase                      | 74.3434 | 74.9104 | 131.31  | 114.317 | 57.7839 | 63.0851  | 11.6314  | 41.0142 |
| AAELO02740 | homeobox protein otx                                    | 13.3456 | 15.0058 | 12.4565 | 12.737  | 13.6941 | 16.396   | 0.137018 | 4.24862 |
| AAELO02769 | homeobox protein prospero/prox-1                        | 14.9445 | 14.0447 | 13.8258 | 15.6116 | 13.1207 | 14.9475  | 0.896982 | 7.66991 |
| AAELO09949 | homeotic antennapedia protein, putative                 | 19.0548 | 21.0334 | 28.8075 | 20.3452 | 11.6969 | 10.1527  | 0.882381 | 9.54075 |
| AAELO13637 | homogentisate 1,2-dioxygenase                           | 32.8327 | 48.6646 | 6.71054 | 5.22653 | 15.2216 | 12.2206  | 1.28783  | 14.3372 |
| AAELO04401 | HPX7                                                    | 219.367 | 206.154 | 17.6291 | 43.2112 | 94.305  | 97.9846  | 1.95119  | 114.061 |
| AAELO04388 | HPX8A                                                   | 157.632 | 154.771 | 225.725 | 181.715 | 84.8077 | 84.3879  | 1.76198  | 89.3823 |
| AAELO04390 | HPX8B                                                   | 743.736 | 609.752 | 230.614 | 451.652 | 396.572 | 390.362  | 7.70715  | 342.482 |
| AAELO04386 | HPX8C                                                   | 385.531 | 341.083 | 155.745 | 259.284 | 317.875 | 318.677  | 3.91822  | 182.362 |
| AAELO14598 | huntingtin interacting protein                          | 4.27348 | 3.64577 | 4.58315 | 5.07729 | 5.26852 | 5.13868  | 71.5841  | 29.4527 |
| AAELO10449 | huntingtin interacting protein                          | 1.73682 | 1.58103 | 1.83827 | 1.94478 | 2.08815 | 1.8942   | 32.1952  | 12.4012 |
| AAELO06509 | hydrogen-transporting ATP synthase, G-subunit, putative | 173.921 | 212.913 | 207.031 | 179.322 | 293.54  | 299.905  | 452.811  | 373.168 |
| AAELO08835 | hypothetical protein                                    | 14.0972 | 14.2645 | 15.9713 | 17.9494 | 23.8281 | 23.4698  | 0.40416  | 6.9524  |
| AAELO08511 | hypothetical protein                                    | 12.3372 | 14.9924 | 16.3221 | 15.6992 | 6.21462 | 6.74209  | 0.13999  | 8.90984 |
| AAELO12637 | hypothetical protein                                    | 18.9183 | 16.6524 | 26.0701 | 25.2479 | 19.2775 | 18.4295  | 4.067    | 11.6958 |
| AAELO12815 | hypothetical protein                                    | 108.075 | 105.577 | 128.844 | 142.243 | 82.6691 | 87.4366  | 23.6202  | 71.4923 |
| AAELO09208 | hypothetical protein                                    | 15.0474 | 13.7139 | 34.9891 | 21.656  | 14.0957 | 13.6572  | 18.0531  | 15.1506 |
| AAELO13545 | hypothetical protein                                    | 2.26476 | 5.23918 | 2.98714 | 3.4675  | 7.8382  | 9.21599  | 4.68536  | 12.0096 |
| AAELO14877 | hypothetical protein                                    | 0       | 0       | 85.2193 | 339.495 | 0       | 0        | 0.393603 | 0       |

|            |                      |          |          |          |          |          |          |          |          |
|------------|----------------------|----------|----------|----------|----------|----------|----------|----------|----------|
| AAEL003190 | hypothetical protein | 0.682168 | 0.39769  | 0.128944 | 0.595462 | 3.02207  | 2.29595  | 314.378  | 117.309  |
| AAEL007012 | hypothetical protein | 15.0541  | 10.2136  | 30.3096  | 8.73956  | 5.03291  | 0.420931 | 0.96054  | 0.281692 |
| AAEL013616 | hypothetical protein | 22.2196  | 22.8765  | 32.8944  | 26.8807  | 22.6921  | 22.2644  | 8.1035   | 18.4348  |
| AAEL014522 | hypothetical protein | 25.3385  | 22.6203  | 31.8504  | 28.0864  | 22.3908  | 22.2497  | 5.45224  | 14.1816  |
| AAEL011266 | hypothetical protein | 34.961   | 35.9123  | 49.5359  | 91.0167  | 69.1234  | 69.8012  | 21.9014  | 27.2218  |
| AAEL005213 | hypothetical protein | 199.271  | 234.218  | 230.401  | 307.708  | 333.97   | 346.755  | 385.384  | 292.079  |
| AAEL013916 | hypothetical protein | 8.84072  | 10.923   | 16.1078  | 15.012   | 8.50115  | 10.0572  | 0.155352 | 5.83789  |
| AAEL001958 | hypothetical protein | 17.5674  | 19.3261  | 31.7943  | 28.9595  | 21.3123  | 18.6275  | 0.213737 | 9.82469  |
| AAEL012050 | hypothetical protein | 2.45313  | 6.05632  | 4.66672  | 3.08672  | 4.26002  | 4.88602  | 0        | 6.04148  |
| AAEL012398 | hypothetical protein | 0.736314 | 0.282133 | 0.190921 | 0.158592 | 0.830446 | 1.03886  | 161.222  | 64.59    |
| AAEL002297 | hypothetical protein | 120.608  | 24.1057  | 56.3871  | 54.0072  | 60.5523  | 19.2767  | 20.5345  | 79.0977  |
| AAEL007879 | hypothetical protein | 10.8265  | 12.6159  | 0.402052 | 1.84044  | 9.29075  | 8.85887  | 0.206568 | 6.97257  |
| AAEL009890 | hypothetical protein | 18.1588  | 17.5672  | 19.4798  | 20.7121  | 17.9113  | 18.437   | 7.5596   | 14.545   |
| AAEL007086 | hypothetical protein | 19.7269  | 16.306   | 15.0606  | 20.945   | 26.5716  | 18.9136  | 1.32107  | 8.82575  |
| AAEL008101 | hypothetical protein | 6.66713  | 7.54015  | 12.0887  | 11.7601  | 5.13925  | 5.11503  | 1.47003  | 6.79952  |
| AAEL008927 | hypothetical protein | 102.365  | 106.037  | 149.244  | 135.41   | 86.0365  | 77.5352  | 20.0632  | 56.8016  |
| AAEL012119 | hypothetical protein | 26.4585  | 30.2907  | 39.7281  | 18.2393  | 39.3199  | 33.4011  | 17.495   | 21.6265  |
| AAEL015044 | hypothetical protein | 10.5505  | 9.87511  | 12.5344  | 12.5655  | 11.6716  | 10.1674  | 1.76276  | 6.90313  |
| AAEL004322 | hypothetical protein | 53.52    | 51.1508  | 24.2378  | 34.283   | 53.4978  | 55.15    | 13.2367  | 34.1069  |
| AAEL009687 | hypothetical protein | 19.8403  | 37.7746  | 37.6543  | 44.2582  | 15.7977  | 19.7766  | 27.3587  | 41.0187  |
| AAEL000005 | hypothetical protein | 27.7279  | 26.0935  | 34.4804  | 27.5257  | 30.8947  | 30.811   | 7.92174  | 17.4151  |
| AAEL004384 | hypothetical protein | 12.9321  | 16.2233  | 16.5901  | 9.94771  | 15.8936  | 14.5098  | 252.067  | 121.883  |
| AAEL008772 | hypothetical protein | 29.5566  | 28.9745  | 22.3297  | 27.1279  | 32.0641  | 34.5874  | 0.669487 | 19.9158  |
| AAEL010705 | hypothetical protein | 0.655374 | 0.834383 | 948.379  | 2602.97  | 0.619247 | 0.564621 | 1.20899  | 1.22964  |
| AAEL007417 | hypothetical protein | 30.9734  | 30.4854  | 43.4469  | 42.6945  | 22.2512  | 25.1763  | 16.724   | 24.0457  |
| AAEL000861 | hypothetical protein | 0.763436 | 0.647683 | 0.647108 | 0.981756 | 1.62978  | 1.91502  | 217.399  | 98.6986  |
| AAEL014991 | hypothetical protein | 25.1227  | 28.0235  | 23.8305  | 23.2745  | 20.5478  | 19.78    | 8.63146  | 16.3665  |
| AAEL013659 | hypothetical protein | 114.906  | 103.322  | 148.904  | 141.851  | 46.9169  | 50.9608  | 0.925466 | 48.8728  |
| AAEL002252 | hypothetical protein | 34.6037  | 24.3325  | 48.2975  | 32.3444  | 27.3365  | 16.4441  | 29.1547  | 22.708   |
| AAEL011350 | hypothetical protein | 1.83902  | 1.17297  | 20.6476  | 5.39568  | 3.93381  | 4.64815  | 1.50074  | 1.49971  |
| AAEL005916 | hypothetical protein | 40.1389  | 37.1668  | 20.1436  | 30.5137  | 24.6374  | 26.5837  | 0.335663 | 18.7889  |
| AAEL013133 | hypothetical protein | 57.7439  | 55.9739  | 110.597  | 86.1328  | 67.1032  | 66.2643  | 150.878  | 84.51    |
| AAEL005873 | hypothetical protein | 30.0849  | 32.9362  | 40.1602  | 41.8966  | 48.3419  | 47.1238  | 8.13828  | 25.1231  |
| AAEL008027 | hypothetical protein | 39.2748  | 40.6805  | 41.8897  | 44.8201  | 19.4421  | 20.8003  | 16.8458  | 28.9694  |
| AAEL000058 | hypothetical protein | 0.058168 | 0.099985 | 0.085544 | 17.2086  | 0.104847 | 0.057241 | 0.067594 | 0.150377 |

|            |                      |          |          |          |          |          |          |          |          |
|------------|----------------------|----------|----------|----------|----------|----------|----------|----------|----------|
| AAEL004894 | hypothetical protein | 0.074645 | 0.175527 | 82.7249  | 152.572  | 0.067984 | 0        | 0        | 0.13254  |
| AAEL007841 | hypothetical protein | 40.996   | 40.3483  | 76.3747  | 69.3183  | 31.4009  | 30.1311  | 11.8552  | 26.1762  |
| AAEL000702 | hypothetical protein | 30.8076  | 27.6538  | 29.8711  | 26.521   | 39.0296  | 42.9046  | 86.0969  | 38.2362  |
| AAEL004591 | hypothetical protein | 49.292   | 82.1277  | 27.8244  | 28.0834  | 76.9878  | 98.2405  | 2.73713  | 19.439   |
| AAEL014041 | hypothetical protein | 10.1582  | 9.51923  | 11.364   | 9.06598  | 12.9725  | 13.1788  | 0.468033 | 4.78262  |
| AAEL010056 | hypothetical protein | 142.809  | 196.838  | 104.157  | 95.4382  | 83.2076  | 107.462  | 272.035  | 201.028  |
| AAEL012858 | hypothetical protein | 119.667  | 116.716  | 8.66927  | 8.2576   | 73.6123  | 61.6964  | 3.48958  | 56.6768  |
| AAEL013799 | hypothetical protein | 22.8461  | 24.0782  | 54.7326  | 42.414   | 12.2462  | 13.1993  | 0.478581 | 13.5095  |
| AAEL010978 | hypothetical protein | 22.7563  | 22.4635  | 18.7164  | 17.1534  | 22.2777  | 23.0748  | 5.11312  | 14.111   |
| AAEL008137 | hypothetical protein | 66.8723  | 59.076   | 153.533  | 151.696  | 16.4066  | 16.2483  | 1.51096  | 28.4417  |
| AAEL003072 | hypothetical protein | 9.74593  | 4.47175  | 20.1549  | 22.9769  | 4.64705  | 3.89425  | 0.265139 | 8.60239  |
| AAEL014047 | hypothetical protein | 5.97663  | 6.38203  | 6.17222  | 4.64292  | 7.31823  | 4.40257  | 0.915248 | 5.19872  |
| AAEL008710 | hypothetical protein | 0.998944 | 1.02573  | 1.35278  | 2.58498  | 9.73919  | 4.8444   | 256.312  | 79.6645  |
| AAEL000002 | hypothetical protein | 24.8478  | 25.9687  | 39.9746  | 81.1533  | 47.0689  | 23.0583  | 2.1628   | 12.1239  |
| AAEL000172 | hypothetical protein | 54.5744  | 52.296   | 71.9907  | 58.8273  | 53.7561  | 54.5815  | 22.3532  | 40.797   |
| AAEL000257 | hypothetical protein | 31.5691  | 31.3164  | 37.4232  | 34.2648  | 33.93    | 32.4408  | 8.5488   | 16.784   |
| AAEL000657 | hypothetical protein | 70.2718  | 85.0113  | 165.269  | 198.906  | 78.1373  | 76.7406  | 10.5479  | 43.2371  |
| AAEL000723 | hypothetical protein | 2.64334  | 4.4541   | 3.47301  | 4.57415  | 5.82952  | 4.8321   | 0.102674 | 9.05707  |
| AAEL000739 | hypothetical protein | 114.928  | 110.199  | 152.466  | 148.223  | 102.237  | 100.27   | 1.30025  | 44.3078  |
| AAEL000859 | hypothetical protein | 0.890602 | 1.30102  | 0.416815 | 0.513363 | 12.9899  | 5.69915  | 6764.35  | 2423.86  |
| AAEL000969 | hypothetical protein | 32.5307  | 32.1279  | 19.2544  | 26.0244  | 29.9362  | 33.0373  | 9.98412  | 17.9914  |
| AAEL001107 | hypothetical protein | 91.3948  | 127.537  | 251.973  | 182.435  | 131.119  | 207.724  | 1513.34  | 812.705  |
| AAEL001471 | hypothetical protein | 26.5203  | 23.7254  | 21.1485  | 24.8188  | 52.2381  | 50.342   | 306.913  | 109.972  |
| AAEL001519 | hypothetical protein | 0.566153 | 0.221752 | 0.304767 | 0.167835 | 2.31919  | 0.531229 | 33.371   | 12.181   |
| AAEL001679 | hypothetical protein | 2.8793   | 7.00656  | 1.49191  | 1.32765  | 3.49406  | 14.763   | 17721.3  | 13779.2  |
| AAEL001717 | hypothetical protein | 11.5828  | 10.9282  | 16.4187  | 13.6889  | 9.88193  | 13.682   | 3.3532   | 9.25485  |
| AAEL001720 | hypothetical protein | 32.9198  | 34.4234  | 32.4188  | 34.4231  | 22.5669  | 24.7004  | 3.16974  | 16.966   |
| AAEL001748 | hypothetical protein | 27.7212  | 28.1351  | 15.4124  | 18.3662  | 26.5726  | 29.7957  | 4.50504  | 17.8357  |
| AAEL002162 | hypothetical protein | 50.0584  | 47.0338  | 22.1291  | 33.4377  | 43.8433  | 42.783   | 11.7757  | 28.2281  |
| AAEL002283 | hypothetical protein | 43.5801  | 33.9389  | 104.991  | 145.341  | 47.2911  | 44.2736  | 1.0162   | 8.28317  |
| AAEL002320 | hypothetical protein | 9.81817  | 8.46091  | 15.9114  | 14.7025  | 9.66138  | 9.31033  | 0.329062 | 5.4098   |
| AAEL002369 | hypothetical protein | 22.3865  | 20.4095  | 32.4786  | 28.302   | 14.18    | 15.1655  | 5.29353  | 14.3905  |
| AAEL002400 | hypothetical protein | 0.222484 | 0.199284 | 105.47   | 692.378  | 0.106273 | 0.298442 | 0.447195 | 0.123263 |
| AAEL002586 | hypothetical protein | 26.6317  | 28.0823  | 75.6572  | 64.886   | 20.9423  | 20.7093  | 0.360058 | 18.9635  |
| AAEL002757 | hypothetical protein | 0.94201  | 2.60912  | 1.38209  | 0.701356 | 10.5414  | 1.78399  | 18.6994  | 8.75428  |

|            |                      |          |          |          |          |          |          |          |          |
|------------|----------------------|----------|----------|----------|----------|----------|----------|----------|----------|
| AAEL002899 | hypothetical protein | 34.8597  | 34.609   | 38.9761  | 41.6553  | 86.653   | 38.6106  | 22.8622  | 42.5172  |
| AAEL003008 | hypothetical protein | 15.4852  | 16.601   | 18.474   | 16.9713  | 22.8427  | 21.558   | 3.63187  | 9.32509  |
| AAEL003197 | hypothetical protein | 0        | 0        | 0        | 0        | 0        | 0        | 120.367  | 57.8365  |
| AAEL003261 | hypothetical protein | 2.71654  | 3.26052  | 5.09352  | 5.01441  | 7.64544  | 2.79953  | 52.3313  | 14.0189  |
| AAEL003368 | hypothetical protein | 22.1686  | 23.181   | 26.6982  | 24.5841  | 23.1186  | 22.4791  | 66.258   | 30.2751  |
| AAEL003667 | hypothetical protein | 6.99587  | 5.11673  | 5.30337  | 4.44462  | 9.20808  | 11.6479  | 249.395  | 108.537  |
| AAEL003693 | hypothetical protein | 43.5704  | 42.0687  | 66.1261  | 40.6175  | 34.3822  | 34.6498  | 29.5794  | 35.1148  |
| AAEL003783 | hypothetical protein | 8.09645  | 7.88079  | 13.7037  | 13.4251  | 6.25804  | 5.79666  | 1.38824  | 5.65456  |
| AAEL004070 | hypothetical protein | 2.67327  | 2.47036  | 1.25155  | 1.69122  | 1.20731  | 0.85936  | 56.2546  | 25.6427  |
| AAEL004336 | hypothetical protein | 36.5493  | 33.2082  | 61.0002  | 59.4267  | 23.0052  | 23.2179  | 5.46532  | 20.8618  |
| AAEL004387 | hypothetical protein | 20.8391  | 19.0043  | 32.6947  | 27.5837  | 8.55119  | 8.0544   | 2.28052  | 11.6781  |
| AAEL004454 | hypothetical protein | 97.0683  | 124.336  | 138.619  | 62.3207  | 249.005  | 161.209  | 139.132  | 105.864  |
| AAEL004555 | hypothetical protein | 10.4381  | 10.4804  | 16.2384  | 13.7567  | 5.61968  | 4.78391  | 0.207244 | 4.73294  |
| AAEL004593 | hypothetical protein | 6.61958  | 6.74893  | 5.65066  | 6.51955  | 13.0402  | 14.7222  | 0.286    | 3.73004  |
| AAEL004695 | hypothetical protein | 12.0487  | 18.3785  | 11.6407  | 8.74289  | 10.6554  | 10.2164  | 30.2345  | 52.4132  |
| AAEL004869 | hypothetical protein | 30.2767  | 30.3543  | 43.2822  | 37.818   | 35.2838  | 34.519   | 4.2191   | 16.3562  |
| AAEL004912 | hypothetical protein | 0        | 0        | 0.515042 | 21.5965  | 0        | 0        | 0        | 0        |
| AAEL005100 | hypothetical protein | 25.797   | 24.3706  | 23.0518  | 23.9198  | 16.0915  | 15.6132  | 7.10151  | 15.9354  |
| AAEL005192 | hypothetical protein | 0.912911 | 0.348858 | 2085.58  | 1615.18  | 0.283405 | 0.307982 | 1.40632  | 0.537475 |
| AAEL005256 | hypothetical protein | 29.6844  | 29.3157  | 24.5459  | 31.1047  | 31.2431  | 32.1586  | 3.4793   | 16.5181  |
| AAEL005286 | hypothetical protein | 21.9844  | 22.4042  | 28.7741  | 30.6168  | 12.9963  | 14.9954  | 0.210369 | 11.7899  |
| AAEL005331 | hypothetical protein | 47.0217  | 46.5705  | 31.7636  | 32.6181  | 231.646  | 90.2777  | 1465.17  | 537.887  |
| AAEL005348 | hypothetical protein | 57.671   | 55.5354  | 56.8941  | 70.2702  | 57.0794  | 47.3089  | 10.1781  | 30.1812  |
| AAEL005517 | hypothetical protein | 16.8527  | 14.3269  | 15.3963  | 16.1681  | 17.3329  | 18.2283  | 440.45   | 180.316  |
| AAEL005679 | hypothetical protein | 13.659   | 12.7967  | 21.1866  | 14.4382  | 13.0397  | 15.7831  | 2.54108  | 7.51295  |
| AAEL005940 | hypothetical protein | 0.013838 | 0.024794 | 0.057421 | 99.6824  | 0.045108 | 0        | 0.736668 | 0.416421 |
| AAEL006078 | hypothetical protein | 9.78277  | 8.91691  | 19.2226  | 27.5062  | 6.80415  | 8.88079  | 0.702031 | 6.69994  |
| AAEL006138 | hypothetical protein | 0        | 0        | 7.41814  | 9.68332  | 5.04166  | 5.30097  | 375.553  | 8823.48  |
| AAEL006156 | hypothetical protein | 0        | 20.8536  | 0.398705 | 0.439689 | 0.774639 | 0.463937 | 1.17707  | 7.71862  |
| AAEL006229 | hypothetical protein | 70.5367  | 70.3377  | 45.9166  | 58.551   | 56.9755  | 57.3652  | 7.28411  | 32.2575  |
| AAEL006323 | hypothetical protein | 70.0454  | 56.1103  | 1.9351   | 3.38816  | 23.2558  | 22.7996  | 2.0416   | 20.0785  |
| AAEL006555 | hypothetical protein | 28.0326  | 28.8047  | 11.2546  | 13.2483  | 23.2716  | 25.5565  | 2.06075  | 16.0156  |
| AAEL006768 | hypothetical protein | 8.67235  | 8.75942  | 36.0871  | 67.4005  | 9.87124  | 9.68818  | 0.695345 | 6.95886  |
| AAEL006931 | hypothetical protein | 68.2555  | 69.6768  | 88.4169  | 91.8659  | 65.574   | 65.9157  | 47.7195  | 53.6829  |
| AAEL007295 | hypothetical protein | 10.5712  | 8.99138  | 13.9858  | 11.6637  | 13.7854  | 13.2178  | 0.505215 | 5.43453  |

|            |                      |          |          |          |          |          |          |          |          |
|------------|----------------------|----------|----------|----------|----------|----------|----------|----------|----------|
| AAEL007371 | hypothetical protein | 66.1601  | 60.4468  | 91.2854  | 77.6587  | 242.48   | 230.816  | 5.6813   | 34.1614  |
| AAEL007571 | hypothetical protein | 26.5826  | 13.2826  | 69.3567  | 55.4084  | 5.1163   | 0.556945 | 0        | 30.6366  |
| AAEL007610 | hypothetical protein | 1.41198  | 0.963255 | 0.904984 | 0.598436 | 0.734289 | 0.861482 | 16.6739  | 4.82048  |
| AAEL007627 | hypothetical protein | 10.4667  | 9.05937  | 11.8138  | 13.6842  | 10.7219  | 11.2648  | 1.63375  | 6.88193  |
| AAEL007726 | hypothetical protein | 13.8175  | 12.5284  | 11.2233  | 11.9671  | 8.27415  | 8.65274  | 0.564136 | 6.06438  |
| AAEL008024 | hypothetical protein | 12.3702  | 12.2682  | 17.7246  | 27.4029  | 15.3371  | 11.9838  | 60.3591  | 23.8486  |
| AAEL008106 | hypothetical protein | 100.78   | 99.4343  | 75.3291  | 70.8205  | 395.609  | 320.143  | 14.0355  | 30.0067  |
| AAEL008280 | hypothetical protein | 0.057014 | 0.065782 | 45.5899  | 276.8    | 0        | 0.167237 | 0.128801 | 0        |
| AAEL008446 | hypothetical protein | 0.162556 | 0.759367 | 0.120665 | 0.553787 | 1.16446  | 0.789077 | 17.924   | 5.17442  |
| AAEL008520 | hypothetical protein | 43.3446  | 34.8738  | 69.678   | 47.3752  | 44.9489  | 51.2804  | 36.672   | 29.5655  |
| AAEL008612 | hypothetical protein | 19.9329  | 17.6006  | 12.6153  | 17.1193  | 19.6058  | 19.7337  | 3.98753  | 10.981   |
| AAEL008639 | hypothetical protein | 15.9719  | 23.7162  | 4.34717  | 5.24722  | 6.55329  | 5.70347  | 185.627  | 69.3764  |
| AAEL008775 | hypothetical protein | 5.65314  | 1.14974  | 2.90412  | 0.530503 | 4.29915  | 14.466   | 0        | 0.093216 |
| AAEL008792 | hypothetical protein | 28.2492  | 26.2165  | 45.01    | 38.3823  | 23.1632  | 23.134   | 3.47816  | 15.1167  |
| AAEL008813 | hypothetical protein | 32.2352  | 34.0154  | 30.0413  | 27.6959  | 43.4892  | 57.0914  | 23.2864  | 36.3198  |
| AAEL008830 | hypothetical protein | 42.3509  | 39.1385  | 44.046   | 42.9705  | 54.8173  | 50.7176  | 19.1845  | 29.5196  |
| AAEL008944 | hypothetical protein | 9.6659   | 10.2807  | 10.9058  | 9.76526  | 11.1133  | 11.3558  | 0.359838 | 3.99307  |
| AAEL009162 | hypothetical protein | 3.55848  | 0        | 10.3646  | 0        | 3.39666  | 0        | 0        | 0        |
| AAEL009270 | hypothetical protein | 26.142   | 26.334   | 31.5842  | 28.2924  | 27.3207  | 25.1552  | 5.383    | 17.5452  |
| AAEL009347 | hypothetical protein | 27.8028  | 25.8223  | 75.4158  | 44.1898  | 20.1366  | 22.7354  | 3.34879  | 13.5033  |
| AAEL009403 | hypothetical protein | 1454.08  | 1558.41  | 646.053  | 631.242  | 3360.96  | 3450.2   | 3012.23  | 2333.03  |
| AAEL009477 | hypothetical protein | 0.136198 | 0.071322 | 0.834764 | 0.375028 | 1.52696  | 0.709018 | 130.773  | 54.2937  |
| AAEL009491 | hypothetical protein | 69.1833  | 57.7118  | 64.2182  | 92.4094  | 54.1609  | 66.4079  | 2.05848  | 32.8596  |
| AAEL009519 | hypothetical protein | 594.703  | 578.735  | 464.002  | 434.873  | 525.306  | 587.904  | 16.0464  | 301.135  |
| AAEL009612 | hypothetical protein | 19.6335  | 18.8836  | 27.9611  | 19.5131  | 47.3814  | 47.6871  | 9.82831  | 16.3209  |
| AAEL009645 | hypothetical protein | 35.7938  | 39.5637  | 21.1451  | 18.8258  | 106.895  | 41.13    | 305.878  | 137.442  |
| AAEL009730 | hypothetical protein | 9.96776  | 9.09568  | 10.8617  | 8.90712  | 12.248   | 10.7643  | 2.2011   | 7.15926  |
| AAEL009756 | hypothetical protein | 32.2664  | 30.4822  | 38.8361  | 40.2884  | 34.867   | 30.5786  | 11.6269  | 20.3326  |
| AAEL009901 | hypothetical protein | 81.769   | 81.9918  | 96.9745  | 102.355  | 61.6975  | 71.1812  | 9.49151  | 50.6414  |
| AAEL009962 | hypothetical protein | 75.7533  | 57.1568  | 109.562  | 100.123  | 25.8729  | 26.8169  | 1.24696  | 47.2251  |
| AAEL009968 | hypothetical protein | 14.1259  | 10.0605  | 25.9504  | 23.8888  | 9.07901  | 8.90864  | 91.5326  | 38.9132  |
| AAEL009972 | hypothetical protein | 94.5158  | 83.2344  | 204.436  | 180.661  | 50.1788  | 46.7679  | 1.15813  | 61.6277  |
| AAEL009989 | hypothetical protein | 5.88269  | 6.83308  | 8.15849  | 6.34708  | 8.06264  | 7.49234  | 126.979  | 59.8466  |
| AAEL010010 | hypothetical protein | 14.1746  | 15.2184  | 21.8726  | 20.0505  | 17.3095  | 18.7162  | 1.9138   | 8.9713   |
| AAEL010155 | hypothetical protein | 259.28   | 208.481  | 404.571  | 261.705  | 25.9766  | 29.621   | 5.39422  | 116.083  |



|            |                      |          |          |          |          |          |          |          |         |
|------------|----------------------|----------|----------|----------|----------|----------|----------|----------|---------|
| AAELO10229 | hypothetical protein | 90.6677  | 81.8729  | 78.0709  | 102.001  | 50.6291  | 58.0079  | 0.559518 | 55.3608 |
| AAELO10416 | hypothetical protein | 0.056724 | 0.131109 | 0.454132 | 0.432924 | 5.13215  | 3.29915  | 319.347  | 130.256 |
| AAELO10489 | hypothetical protein | 12.4535  | 11.8617  | 5.23103  | 7.12702  | 8.84715  | 8.9251   | 0.164269 | 6.15701 |
| AAELO10652 | hypothetical protein | 215.645  | 237.973  | 412.259  | 291.128  | 103.7    | 158.271  | 481.572  | 205.967 |
| AAELO10722 | hypothetical protein | 14.3817  | 13.7272  | 23.3192  | 20.9321  | 11.5047  | 11.5319  | 1.76755  | 8.15995 |
| AAELO10820 | hypothetical protein | 26.4283  | 26.1531  | 17.5448  | 21.9862  | 21.0181  | 20.5657  | 0.890625 | 12.9856 |
| AAELO10840 | hypothetical protein | 154.062  | 165.33   | 150.046  | 112.476  | 222.064  | 226.132  | 346.176  | 253.631 |
| AAELO10899 | hypothetical protein | 53.4344  | 50.4407  | 17.0341  | 31.629   | 47.5242  | 48.1499  | 17.7796  | 32.5337 |
| AAELO11262 | hypothetical protein | 22.6216  | 22.9795  | 27.2019  | 62.3589  | 3.29312  | 28.1741  | 27.8444  | 3.60136 |
| AAELO11267 | hypothetical protein | 32.5181  | 30.3305  | 36.1467  | 34.0995  | 29.5588  | 31.8958  | 15.2774  | 22.2346 |
| AAELO11362 | hypothetical protein | 9.11573  | 9.22361  | 12.6574  | 11.5939  | 10.3048  | 11.4256  | 2.08458  | 7.73148 |
| AAELO11472 | hypothetical protein | 16.7872  | 18.1037  | 14.6759  | 12.2713  | 22.1197  | 22.8722  | 0.511169 | 5.9227  |
| AAELO11532 | hypothetical protein | 19.1268  | 14.7695  | 25.6826  | 28.9106  | 13.3713  | 16.338   | 0.605675 | 6.31351 |
| AAELO11847 | hypothetical protein | 38.3674  | 36.8729  | 31.73    | 29.5492  | 32.2551  | 32.249   | 8.32028  | 21.0089 |
| AAELO11918 | hypothetical protein | 36.5527  | 41.1228  | 50.7162  | 40.5329  | 40.4456  | 33.9648  | 23.8575  | 33.0882 |
| AAELO11998 | hypothetical protein | 1.55954  | 1.95658  | 0.750806 | 0.599957 | 6.60073  | 1.64886  | 222.207  | 93.9285 |
| AAELO12085 | hypothetical protein | 4.94792  | 6.70983  | 6.38506  | 6.32739  | 7.90685  | 8.55074  | 96.4885  | 33.9792 |
| AAELO12236 | hypothetical protein | 17.0301  | 15.9387  | 22.6424  | 21.0896  | 16.4037  | 16.9634  | 1.71341  | 8.21447 |
| AAELO12244 | hypothetical protein | 24.4309  | 21.2662  | 24.5192  | 33.1179  | 28.3101  | 18.3931  | 121.184  | 61.1469 |
| AAELO12322 | hypothetical protein | 242.462  | 267.309  | 423.313  | 346.707  | 160.496  | 167.929  | 882.773  | 460.324 |
| AAELO12437 | hypothetical protein | 46.2699  | 49.4547  | 57.5896  | 60.5597  | 53.0011  | 52.6921  | 5.30202  | 26.1012 |
| AAELO12445 | hypothetical protein | 60.3676  | 63.4035  | 95.1296  | 89.4409  | 74.5836  | 70.4064  | 10.8552  | 35.5968 |
| AAELO12505 | hypothetical protein | 3.17245  | 1.35746  | 2.14466  | 1.90843  | 13.5598  | 11.8177  | 152.139  | 34.8393 |
| AAELO12639 | hypothetical protein | 4.34456  | 0.128785 | 1.15652  | 0.443224 | 0.403032 | 0.330406 | 20.9884  | 1.88112 |
| AAELO12976 | hypothetical protein | 11.7434  | 7.27627  | 14.5349  | 18.9271  | 2.55785  | 1.86848  | 0        | 9.88812 |
| AAELO13317 | hypothetical protein | 20.5071  | 18.3986  | 24.0017  | 21.8221  | 22.1725  | 23.5836  | 0.913753 | 9.56412 |
| AAELO13402 | hypothetical protein | 81.3703  | 58.2847  | 94.7044  | 88.7895  | 50.8231  | 55.1008  | 37.2129  | 38.9613 |
| AAELO13578 | hypothetical protein | 6.49102  | 6.27045  | 7.49064  | 7.50915  | 7.05353  | 6.56396  | 1.40177  | 6.62703 |
| AAELO13731 | hypothetical protein | 52.7212  | 49.4141  | 56.712   | 45.4913  | 62.8271  | 59.9555  | 34.9629  | 41.8085 |
| AAELO13734 | hypothetical protein | 66.3571  | 67.1161  | 140.454  | 92.7629  | 58.6745  | 68.1344  | 0.383803 | 44.2507 |
| AAELO13874 | hypothetical protein | 23.4392  | 21.2511  | 10.6765  | 19.7872  | 35.4561  | 14.9356  | 10.3486  | 29.5187 |
| AAELO14128 | hypothetical protein | 95.8581  | 92.2027  | 2752.88  | 5350.38  | 37.1835  | 82.6639  | 6.05498  | 26.4185 |
| AAELO14376 | hypothetical protein | 9.23557  | 7.87391  | 7.50975  | 7.4529   | 15.9848  | 16.435   | 0.89848  | 4.84117 |
| AAELO14812 | hypothetical protein | 64.966   | 69.7416  | 38.1342  | 57.1042  | 58.4911  | 66.9375  | 29.0313  | 57.5928 |
| AAELO14821 | hypothetical protein | 38.9322  | 49.7965  | 25.776   | 19.2119  | 25.4476  | 25.8878  | 1182.59  | 658.617 |

|             |                      |          |          |          |          |          |          |          |          |
|-------------|----------------------|----------|----------|----------|----------|----------|----------|----------|----------|
| AAELO14827  | hypothetical protein | 19.0491  | 19.8967  | 28.6922  | 25.5994  | 20.4198  | 20.7807  | 8.0805   | 13.9585  |
| AAELO15118  | hypothetical protein | 0        | 4.01132  | 0        | 6.16128  | 0        | 0        | 0        | 0        |
| AAELO15306  | hypothetical protein | 19.5891  | 56.1731  | 21.3268  | 4.06994  | 14.2927  | 15.3152  | 11.2231  | 17.2512  |
| AAELO15447  | hypothetical protein | 0.142891 | 0.181119 | 0.409368 | 0.485899 | 5.01283  | 2.1145   | 321.093  | 165.669  |
| AAELO15606  | hypothetical protein | 49.0558  | 56.664   | 0.805206 | 0.883637 | 0.571363 | 0.992812 | 5.32558  | 25.8643  |
| AAELO13784  | hypothetical protein | 10.7499  | 7.21608  | 12.6748  | 10.5788  | 8.59393  | 9.66476  | 46.5073  | 18.9206  |
| AAELO009060 | hypothetical protein | 9.18478  | 7.51661  | 10.235   | 8.84258  | 8.57359  | 8.93362  | 2.88842  | 7.57209  |
| AAELO003110 | hypothetical protein | 0        | 0.021973 | 2.23721  | 71.29    | 0        | 0        | 0.043652 | 0        |
| AAELO009529 | hypothetical protein | 15.2671  | 13.5178  | 26.9486  | 22.046   | 15.9608  | 13.5366  | 132.425  | 64.6653  |
| AAELO007449 | hypothetical protein | 41.8861  | 39.7522  | 12.2327  | 25.8654  | 22.1847  | 24.1349  | 13.4752  | 23.0192  |
| AAELO001322 | hypothetical protein | 23.4583  | 21.5677  | 41.7352  | 37.6459  | 15.2969  | 15.5996  | 8.22653  | 15.7709  |
| AAELO006968 | hypothetical protein | 189.91   | 198.966  | 282.619  | 241.418  | 214.358  | 226.029  | 4.91461  | 102.632  |
| AAELO14126  | hypothetical protein | 0.949758 | 0.386984 | 1604.63  | 516.149  | 0.147426 | 0.092365 | 0.728608 | 0.414273 |
| AAELO000167 | hypothetical protein | 22.3596  | 23.7185  | 12.6244  | 15.063   | 18.2317  | 20.1231  | 13.5058  | 19.8209  |
| AAELO001357 | hypothetical protein | 26.5083  | 27.1897  | 36.7332  | 24.9102  | 24.0022  | 24.4853  | 3.22023  | 14.8562  |
| AAELO000638 | hypothetical protein | 3.83623  | 3.40904  | 4.37494  | 9.64919  | 6.36257  | 5.63661  | 37.202   | 6.19147  |
| AAELO11515  | hypothetical protein | 8.4795   | 8.42008  | 15.0722  | 12.1337  | 4.37906  | 6.32677  | 1093.64  | 456.382  |
| AAELO003403 | hypothetical protein | 26.6496  | 27.4173  | 33.5415  | 34.0158  | 16.401   | 16.45    | 3.05191  | 13.2397  |
| AAELO007264 | hypothetical protein | 0        | 0        | 0.491435 | 21.3193  | 0        | 0.061602 | 0.138659 | 0.101657 |
| AAELO009787 | hypothetical protein | 10.0208  | 10.1442  | 4.48962  | 5.48026  | 7.18817  | 8.27752  | 0.227531 | 4.57793  |
| AAELO007338 | hypothetical protein | 110.024  | 112.843  | 36.0641  | 53.5489  | 63.4327  | 56.6599  | 15.3693  | 64.139   |
| AAELO005447 | hypothetical protein | 15.6891  | 19.0631  | 32.5371  | 28.1631  | 15.2555  | 17.6972  | 2.37287  | 8.5271   |
| AAELO004315 | hypothetical protein | 27.1652  | 31.0753  | 35.1848  | 29.777   | 31.4766  | 31.2697  | 0.350045 | 11.4808  |
| AAELO008050 | hypothetical protein | 19.2534  | 6.46978  | 0.854803 | 1.03148  | 18.1885  | 9.88404  | 1.25671  | 0.759334 |
| AAELO001350 | hypothetical protein | 20.1887  | 20.7697  | 24.0929  | 19.6179  | 13.7431  | 13.3961  | 6.93496  | 16.1248  |
| AAELO003816 | hypothetical protein | 3.57172  | 3.13401  | 8.58479  | 9.48151  | 19.1587  | 94.5958  | 1705.98  | 696.941  |
| AAELO003821 | hypothetical protein | 1.04947  | 0.719978 | 0.47451  | 0.55183  | 1.30111  | 12.8613  | 102.933  | 62.3712  |
| AAELO004421 | hypothetical protein | 174.649  | 174.887  | 140.652  | 190.841  | 161.585  | 156.986  | 380.734  | 261.82   |
| AAELO11523  | hypothetical protein | 12.6719  | 13.0934  | 13.1983  | 8.31416  | 11.5768  | 9.50064  | 2.22373  | 7.73707  |
| AAELO008785 | hypothetical protein | 255.876  | 229.243  | 104.874  | 106.582  | 242.148  | 247.47   | 18.4894  | 98.543   |
| AAELO002865 | hypothetical protein | 176.126  | 178.236  | 68.9132  | 56.2445  | 112.932  | 141.98   | 620.441  | 386.689  |
| AAELO000615 | hypothetical protein | 23.126   | 23.9741  | 33.1223  | 23.2346  | 37.925   | 42.147   | 2.31314  | 11.1382  |
| AAELO11066  | hypothetical protein | 75.3894  | 83.5297  | 142.175  | 114.523  | 67.882   | 66.6939  | 79.0063  | 75.643   |
| AAELO004462 | hypothetical protein | 63.4504  | 65.3494  | 32.4745  | 55.2047  | 49.6112  | 49.2562  | 1.05678  | 37.3134  |
| AAELO008686 | hypothetical protein | 22.189   | 21.8589  | 67.7568  | 50.6558  | 18.3459  | 14.5852  | 19.7449  | 17.8216  |

|            |                      |          |          |          |          |          |          |          |          |
|------------|----------------------|----------|----------|----------|----------|----------|----------|----------|----------|
| AAEL000319 | hypothetical protein | 0        | 0        | 1.56285  | 68.4858  | 0.439638 | 0.479213 | 0        | 0        |
| AAEL008704 | hypothetical protein | 12.6006  | 14.2269  | 28.3446  | 20.371   | 6.41666  | 6.83024  | 0.344778 | 7.49739  |
| AAEL005474 | hypothetical protein | 108.119  | 105.281  | 82.2074  | 80.949   | 96.9813  | 86.3151  | 3.22535  | 45.5974  |
| AAEL002470 | hypothetical protein | 31.1056  | 34.0718  | 20.532   | 47.21    | 34.2329  | 35.1023  | 29.7574  | 21.462   |
| AAEL011240 | hypothetical protein | 64.9427  | 65.1334  | 69.5374  | 74.6731  | 75.2357  | 69.95    | 35.243   | 44.684   |
| AAEL008938 | hypothetical protein | 42.3706  | 43.718   | 64.0457  | 54.264   | 44.2408  | 44.908   | 19.5037  | 29.5638  |
| AAEL002496 | hypothetical protein | 30.7323  | 31.7403  | 36.0082  | 33.7118  | 27.0221  | 29.5673  | 12.5493  | 20.9937  |
| AAEL012453 | hypothetical protein | 31.6599  | 31.8907  | 27.7112  | 31.2579  | 26.908   | 29.0502  | 0.499427 | 13.9661  |
| AAEL014166 | hypothetical protein | 10.0057  | 11.6419  | 1.55969  | 2.29835  | 3.71371  | 5.3941   | 52.7994  | 21.4472  |
| AAEL004537 | hypothetical protein | 57.7768  | 59.1484  | 48.6354  | 51.3719  | 13.4509  | 14.8609  | 2.06544  | 34.7392  |
| AAEL005179 | hypothetical protein | 4.37771  | 3.99912  | 12.6211  | 41.0564  | 5.13713  | 5.32344  | 197.218  | 76.5801  |
| AAEL010708 | hypothetical protein | 56.4323  | 54.3115  | 39.4194  | 48.1775  | 39.1039  | 42.5028  | 4.38309  | 37.341   |
| AAEL012754 | hypothetical protein | 33.6837  | 33.7247  | 44.4861  | 38.651   | 0        | 34.9398  | 24.562   | 25.2304  |
| AAEL002281 | hypothetical protein | 16.6678  | 17.4775  | 16.262   | 18.3781  | 23.1223  | 24.9331  | 0.237128 | 8.16382  |
| AAEL011297 | hypothetical protein | 8.01465  | 5.68971  | 35.9573  | 370.602  | 0.287601 | 0.105193 | 0.789152 | 4.28483  |
| AAEL013395 | hypothetical protein | 169.631  | 157.993  | 88.4087  | 148.861  | 106.899  | 103.496  | 7.73544  | 55.7004  |
| AAEL009709 | hypothetical protein | 18.2475  | 16.8734  | 16.5179  | 17.7678  | 13.6049  | 13.7632  | 0.155943 | 9.51748  |
| AAEL007805 | hypothetical protein | 36.924   | 36.2206  | 26.782   | 29.9297  | 37.5227  | 38.8131  | 6.64024  | 19.4693  |
| AAEL003361 | hypothetical protein | 14.4841  | 13.1443  | 22.8214  | 19.8937  | 9.03682  | 9.08759  | 1.07733  | 6.07231  |
| AAEL005132 | hypothetical protein | 7.38146  | 8.00682  | 13.8721  | 9.58698  | 9.78243  | 11.296   | 3.48017  | 10.3862  |
| AAEL013710 | hypothetical protein | 0.764706 | 0.429097 | 0.782197 | 0.567658 | 0.389997 | 0.815217 | 41.035   | 17.3805  |
| AAEL000551 | hypothetical protein | 121.278  | 157.333  | 18.8623  | 9.9352   | 107.805  | 115.006  | 23.5196  | 97.6714  |
| AAEL008453 | hypothetical protein | 14.6977  | 15.7342  | 20.0063  | 18.3782  | 10.9269  | 13.3036  | 0.921265 | 10.2945  |
| AAEL014852 | hypothetical protein | 13.7826  | 20.4463  | 3.58022  | 8.27575  | 3.25214  | 3.16473  | 2.38299  | 7.6336   |
| AAEL003797 | hypothetical protein | 10.9956  | 8.11944  | 9.64178  | 12.7278  | 5.06064  | 4.43809  | 0.189923 | 6.08936  |
| AAEL009459 | hypothetical protein | 0.223668 | 0.788771 | 7.56309  | 63.3132  | 23.3973  | 33.6422  | 28.4757  | 0.493649 |
| AAEL004658 | hypothetical protein | 4.94585  | 4.26006  | 20.5547  | 7.36503  | 7.88514  | 9.68343  | 53.7237  | 27.2234  |
| AAEL011980 | hypothetical protein | 11.5869  | 7.27122  | 10.6585  | 21.1622  | 16.9011  | 10.2423  | 767.562  | 344.388  |
| AAEL004316 | hypothetical protein | 20.4899  | 20.5777  | 22.1285  | 24.3339  | 22.2459  | 23.3181  | 0.218407 | 9.39399  |
| AAEL001274 | hypothetical protein | 64.369   | 35.403   | 59.4215  | 70.7326  | 22.3075  | 41.8347  | 0.497512 | 6.18522  |
| AAEL000995 | hypothetical protein | 12.8654  | 17.3426  | 27.4148  | 29.2755  | 9.47599  | 12.5335  | 0.937501 | 4.67137  |
| AAEL008470 | hypothetical protein | 23.5035  | 22.6733  | 78.3862  | 40.6591  | 25.5013  | 20.8694  | 155.485  | 80.2415  |
| AAEL011119 | hypothetical protein | 18.3663  | 9.61858  | 27.2754  | 13.9956  | 42.5364  | 25.4713  | 0.72738  | 6.64213  |
| AAEL003766 | hypothetical protein | 13.9151  | 14.0239  | 7.0519   | 41.6558  | 17.5921  | 15.7597  | 0.36317  | 4.40235  |
| AAEL002778 | hypothetical protein | 45.8805  | 40.6466  | 36.9474  | 48.1634  | 11.401   | 11.2433  | 3.43381  | 22.6995  |

|            |                      |          |          |          |          |          |          |          |          |
|------------|----------------------|----------|----------|----------|----------|----------|----------|----------|----------|
| AAEL006046 | hypothetical protein | 36.8762  | 37.3959  | 40.0549  | 41.7847  | 19.8965  | 20.421   | 0.787423 | 16.768   |
| AAEL007963 | hypothetical protein | 35.8714  | 42.1869  | 6.41315  | 6.80643  | 13.4265  | 12.1623  | 6.00879  | 19.291   |
| AAEL006662 | hypothetical protein | 8.58602  | 13.2259  | 19.3911  | 18.8475  | 89.5667  | 125.488  | 0.580174 | 0.676    |
| AAEL010593 | hypothetical protein | 43.6902  | 44.6107  | 87.6285  | 68.3616  | 24.5065  | 23.8173  | 1.10653  | 34.1745  |
| AAEL008799 | hypothetical protein | 0.913958 | 1.45678  | 23.9     | 292.805  | 0.687415 | 1.06733  | 0        | 0        |
| AAEL006545 | hypothetical protein | 27.1836  | 24.1187  | 33.4899  | 33.3515  | 26.6332  | 24.7471  | 14.1404  | 66.2956  |
| AAEL008892 | hypothetical protein | 5.34138  | 7.38846  | 4.06943  | 6.63816  | 9.47525  | 8.9562   | 0        | 5.18238  |
| AAEL014937 | hypothetical protein | 49.3688  | 136.646  | 116.756  | 77.7686  | 628.746  | 610.065  | 0.838782 | 36.6044  |
| AAEL005755 | hypothetical protein | 167.971  | 206.639  | 147.453  | 123.155  | 224.217  | 206.111  | 238.318  | 233.036  |
| AAEL010420 | hypothetical protein | 13.6605  | 15.1669  | 16.4167  | 13.1925  | 4.04439  | 4.37669  | 0        | 10.0347  |
| AAEL003927 | hypothetical protein | 3.44964  | 5.91099  | 0.35406  | 8.26057  | 0.185732 | 0.305774 | 0        | 3.99568  |
| AAEL000310 | hypothetical protein | 5.18935  | 5.16262  | 5.30636  | 13.2426  | 2.59093  | 2.02044  | 57.0645  | 26.2802  |
| AAEL001062 | hypothetical protein | 2.38881  | 1.44589  | 2.51134  | 1.04903  | 3.14988  | 1.2835   | 37.1112  | 10.3497  |
| AAEL001174 | hypothetical protein | 0.164372 | 0.037076 | 20.8518  | 229.543  | 0.022097 | 0        | 0.077005 | 0.128342 |
| AAEL001362 | hypothetical protein | 114.179  | 116.132  | 215.665  | 186.579  | 113.204  | 96.2492  | 125.873  | 98.1263  |
| AAEL001460 | hypothetical protein | 55.053   | 59.7334  | 64.317   | 62.4987  | 50.3251  | 49.6962  | 17.3784  | 32.8745  |
| AAEL001558 | hypothetical protein | 21.4626  | 25.2606  | 61.0973  | 42.279   | 13.4087  | 14.736   | 16.1225  | 19.488   |
| AAEL001815 | hypothetical protein | 18.5841  | 20.2106  | 18.3715  | 35.3337  | 19.0174  | 15.932   | 3.61883  | 9.20407  |
| AAEL001873 | hypothetical protein | 0.081922 | 0.182109 | 119.904  | 665.226  | 0.280716 | 0.081838 | 0.193151 | 0.285204 |
| AAEL002036 | hypothetical protein | 55.8474  | 54.6835  | 21.5207  | 37.5379  | 65.9101  | 66.4681  | 1.04932  | 30.1941  |
| AAEL002402 | hypothetical protein | 38.1663  | 32.2348  | 53.8694  | 30.8022  | 30.5487  | 34.5931  | 9.4178   | 4.67819  |
| AAEL002474 | hypothetical protein | 9.45814  | 9.23547  | 10.5996  | 23.4851  | 6.9577   | 7.14564  | 0.219455 | 3.50409  |
| AAEL002480 | hypothetical protein | 37.3752  | 36.7123  | 45.2795  | 44.9774  | 41.6842  | 41.1691  | 9.48207  | 25.0219  |
| AAEL002482 | hypothetical protein | 126.201  | 90.7763  | 0.991949 | 1.20014  | 0.609121 | 0.871813 | 4.2998   | 30.7674  |
| AAEL002545 | hypothetical protein | 18.7583  | 15.1928  | 31.3164  | 24.1568  | 19.4671  | 10.8935  | 0.913412 | 31.9733  |
| AAEL002592 | hypothetical protein | 117.804  | 105.037  | 6.70924  | 9.1935   | 11.0438  | 13.5619  | 1.21074  | 80.9506  |
| AAEL002652 | hypothetical protein | 282.454  | 294.727  | 523.082  | 411.496  | 273.962  | 264.514  | 2.76416  | 152.585  |
| AAEL002706 | hypothetical protein | 35.5007  | 32.6533  | 49.2929  | 41.5247  | 32.307   | 29.2013  | 11.8986  | 23.1728  |
| AAEL003299 | hypothetical protein | 19.2196  | 16.6132  | 23.1274  | 18.8611  | 128.05   | 100.241  | 0.492181 | 5.60678  |
| AAEL003590 | hypothetical protein | 28.2485  | 32.3623  | 33.32    | 31.6129  | 55.3123  | 64.3642  | 2378.14  | 1182.58  |
| AAEL003596 | hypothetical protein | 0.031538 | 0.03611  | 0.255147 | 0.267544 | 1.60154  | 0.895972 | 142.376  | 70.2414  |
| AAEL003656 | hypothetical protein | 46.5338  | 55.0251  | 32.5886  | 35.6429  | 62.4804  | 64.6421  | 3.25992  | 16.2154  |
| AAEL003671 | hypothetical protein | 56.4882  | 58.5899  | 47.2875  | 47.4021  | 59.1408  | 57.8165  | 24.2745  | 39.2618  |
| AAEL003764 | hypothetical protein | 0.351232 | 0        | 0.341137 | 0.498453 | 10.0258  | 5.15396  | 1725.67  | 714.497  |
| AAEL003768 | hypothetical protein | 29.586   | 29.3403  | 22.7194  | 25.9642  | 30.8496  | 33.386   | 6.35536  | 14.0778  |

|            |                      |          |          |          |          |         |          |          |          |
|------------|----------------------|----------|----------|----------|----------|---------|----------|----------|----------|
| AAEL003773 | hypothetical protein | 53.7182  | 49.4616  | 113.51   | 91.2142  | 36.0634 | 32.9757  | 21.1189  | 36.0878  |
| AAEL003843 | hypothetical protein | 0.618946 | 0.477245 | 0.151781 | 1.41571  | 4.47042 | 31.3224  | 21.5576  | 13.3541  |
| AAEL004149 | hypothetical protein | 495.58   | 511.522  | 721.741  | 666.696  | 899.777 | 907.523  | 1703.45  | 1002.14  |
| AAEL004230 | hypothetical protein | 9.8876   | 10.2159  | 3.15456  | 2.59316  | 26.5696 | 25.9735  | 64.839   | 29.5326  |
| AAEL004272 | hypothetical protein | 36.5489  | 36.0861  | 47.9376  | 50.0027  | 31.506  | 32.1742  | 3.29224  | 17.0594  |
| AAEL004624 | hypothetical protein | 7.04527  | 6.00191  | 4.1893   | 4.82403  | 9.20854 | 8.68407  | 0.223268 | 3.94587  |
| AAEL005004 | hypothetical protein | 2.03807  | 0.681539 | 1.18559  | 0.555777 | 26.273  | 9.8465   | 0        | 0.472327 |
| AAEL005212 | hypothetical protein | 130.078  | 95.8865  | 2517.2   | 4751.07  | 49.7067 | 56.499   | 3.55599  | 33.2937  |
| AAEL005236 | hypothetical protein | 434.642  | 429.535  | 266.364  | 313.836  | 383.721 | 444.503  | 235.683  | 298.364  |
| AAEL005281 | hypothetical protein | 20.8742  | 20.2538  | 28.6829  | 30.2807  | 13.8702 | 13.7492  | 1.14346  | 8.00347  |
| AAEL005393 | hypothetical protein | 19.0604  | 19.3027  | 13.1027  | 19.3155  | 11.0396 | 12.3398  | 10.7368  | 20.0364  |
| AAEL005421 | hypothetical protein | 50.8893  | 50.6368  | 70.0261  | 58.984   | 41.3205 | 40.0728  | 17.2429  | 33.1325  |
| AAEL005506 | hypothetical protein | 6.01482  | 7.36497  | 9.41394  | 9.53124  | 3.3584  | 6.49854  | 0.279169 | 4.3855   |
| AAEL005509 | hypothetical protein | 5.87257  | 4.87568  | 3.56943  | 3.06913  | 14.8641 | 10.6239  | 38.9807  | 12.9428  |
| AAEL005938 | hypothetical protein | 50.301   | 42.2437  | 75.9706  | 48.448   | 23.5744 | 25.1448  | 0.833204 | 26.2976  |
| AAEL006204 | hypothetical protein | 46.4936  | 47.5939  | 56.8855  | 47.1178  | 39.242  | 38.1858  | 16.3846  | 28.9171  |
| AAEL006546 | hypothetical protein | 14.6161  | 10.2182  | 11.7387  | 18.2599  | 14.9814 | 3.61558  | 17.1579  | 3.25548  |
| AAEL006750 | hypothetical protein | 14.3528  | 14.2346  | 20.5668  | 18.6783  | 12.9342 | 13.755   | 2.59795  | 8.60689  |
| AAEL007000 | hypothetical protein | 9.31132  | 8.9541   | 6.4854   | 4.59432  | 7.43708 | 9.79061  | 0.243618 | 3.74973  |
| AAEL007003 | hypothetical protein | 0.206319 | 0        | 61.4687  | 654.569  | 0       | 0.204135 | 0        | 0.716019 |
| AAEL007199 | hypothetical protein | 12.7816  | 15.977   | 45.4316  | 55.4002  | 19.2768 | 18.4676  | 103.912  | 42.6793  |
| AAEL007249 | hypothetical protein | 13.3674  | 13.0988  | 11.8009  | 13.2758  | 9.97935 | 11.7514  | 0.515838 | 6.7595   |
| AAEL007460 | hypothetical protein | 13.2136  | 14.0228  | 13.4257  | 13.1734  | 16.2356 | 17.1103  | 0.689243 | 6.59481  |
| AAEL007552 | hypothetical protein | 0.029342 | 0        | 1.6402   | 18.272   | 0       | 0        | 0.068462 | 0        |
| AAEL007567 | hypothetical protein | 46.7032  | 46.0862  | 69.2967  | 51.6442  | 84.4504 | 78.2802  | 31.1354  | 31.8006  |
| AAEL007775 | hypothetical protein | 3.37886  | 11.359   | 6.24687  | 6.5615   | 9.43248 | 4.26777  | 0.174792 | 2.03859  |
| AAEL007813 | hypothetical protein | 51.4469  | 47.5155  | 76.4577  | 70.3997  | 48.5224 | 49.7041  | 6.5964   | 29.9491  |
| AAEL007960 | hypothetical protein | 70.0341  | 76.4846  | 89.1632  | 79.9759  | 91.1363 | 93.5667  | 14.9715  | 38.7064  |
| AAEL008405 | hypothetical protein | 12.7446  | 12.8645  | 13.9272  | 12.8769  | 14.4012 | 10.8121  | 43.9077  | 15.6836  |
| AAEL008727 | hypothetical protein | 123.852  | 126.14   | 131.546  | 125.178  | 139.488 | 144.155  | 101.554  | 100.846  |
| AAEL008936 | hypothetical protein | 5.1613   | 6.49687  | 12.1442  | 8.22324  | 102.581 | 71.3304  | 0.090685 | 1.79887  |
| AAEL009070 | hypothetical protein | 63.7055  | 65.7265  | 104.154  | 68.9324  | 113.225 | 122.835  | 39.2689  | 54.2321  |
| AAEL009262 | hypothetical protein | 30.4161  | 28.5278  | 49.039   | 39.9032  | 15.5636 | 15.5934  | 10.811   | 18.6591  |
| AAEL009381 | hypothetical protein | 51.3611  | 50.0748  | 74.7766  | 65.5572  | 39.8981 | 40.477   | 15.6964  | 32.861   |
| AAEL009654 | hypothetical protein | 53.1365  | 49.054   | 43.3137  | 46.0416  | 44.8594 | 46.9064  | 0.745096 | 25.413   |

|             |                      |          |          |          |          |          |          |          |          |
|-------------|----------------------|----------|----------|----------|----------|----------|----------|----------|----------|
| AAELO009746 | hypothetical protein | 0.466471 | 0.288446 | 7.71798  | 142.268  | 0.138942 | 0.150351 | 0.070145 | 0.207803 |
| AAELO009987 | hypothetical protein | 13.6635  | 14.4228  | 17.7518  | 16.7497  | 13.3461  | 13.9359  | 0.173631 | 6.66428  |
| AAELO10282  | hypothetical protein | 15.0799  | 25.6506  | 61.8326  | 40.5728  | 20.6282  | 26.191   | 0        | 15.8978  |
| AAELO10643  | hypothetical protein | 31.6206  | 22.7025  | 56.821   | 34.5705  | 28.0342  | 29.4187  | 14.6533  | 29.2294  |
| AAELO10646  | hypothetical protein | 27.1304  | 28.6616  | 35.1717  | 42.7214  | 10.8756  | 12.0474  | 0.386718 | 13.8714  |
| AAELO10755  | hypothetical protein | 40.6813  | 39.095   | 45.2323  | 47.4572  | 21.2997  | 21.6671  | 18.8695  | 25.4588  |
| AAELO11138  | hypothetical protein | 51.3129  | 54.8834  | 30.2306  | 45.4717  | 58.1789  | 63.7755  | 13.4198  | 25.3965  |
| AAELO12233  | hypothetical protein | 151.741  | 155.349  | 181.175  | 179.877  | 244.078  | 223.545  | 26.781   | 79.9246  |
| AAELO12415  | hypothetical protein | 17.7138  | 18.9207  | 25.3064  | 27.406   | 7.52089  | 6.09533  | 108.1    | 53.0697  |
| AAELO12416  | hypothetical protein | 21.4564  | 19.8749  | 29.3928  | 26.8452  | 16.5476  | 17.4113  | 5.61924  | 12.3097  |
| AAELO12598  | hypothetical protein | 21.5845  | 18.0708  | 23.2361  | 23.3896  | 24.6151  | 25.3603  | 73.8797  | 31.6749  |
| AAELO12630  | hypothetical protein | 2.53607  | 2.67505  | 4.58021  | 5.22691  | 6.98463  | 4.32635  | 60.8605  | 26.4867  |
| AAELO12738  | hypothetical protein | 13.8995  | 11.926   | 25.3833  | 18.506   | 19.7961  | 17.5665  | 43.2284  | 16.2786  |
| AAELO12855  | hypothetical protein | 134.665  | 135.662  | 16.3699  | 14.4643  | 108.256  | 94.3018  | 1.35125  | 45.3989  |
| AAELO12928  | hypothetical protein | 5.49702  | 2.931    | 0.467945 | 9.49004  | 0        | 0        | 0        | 2.14351  |
| AAELO13131  | hypothetical protein | 44.8963  | 44.5716  | 78.7857  | 65.0106  | 46.2809  | 48.8322  | 27.3381  | 34.6045  |
| AAELO13738  | hypothetical protein | 22.1551  | 22.3721  | 88.3495  | 54.1487  | 5.67179  | 5.9254   | 0.845374 | 14.0267  |
| AAELO13919  | hypothetical protein | 14.4279  | 13.9002  | 18.4735  | 17.0655  | 20.7453  | 18.303   | 3.7336   | 13.1643  |
| AAELO14185  | hypothetical protein | 401.877  | 409.204  | 336.214  | 303.777  | 572.535  | 587.897  | 190.533  | 287.541  |
| AAELO14380  | hypothetical protein | 10.6752  | 11.1803  | 5.35199  | 6.46498  | 13.24    | 13.7753  | 0.117542 | 3.63342  |
| AAELO14694  | hypothetical protein | 18.4692  | 21.7983  | 11.6716  | 10.299   | 25.2993  | 24.0849  | 3.52768  | 9.86553  |
| AAELO14828  | hypothetical protein | 13.636   | 12.9053  | 8.59805  | 10.5131  | 16.4293  | 14.2996  | 66.6687  | 29.4588  |
| AAELO15128  | hypothetical protein | 34.074   | 35.3538  | 13.4207  | 17.4192  | 38.0971  | 38.0573  | 0.168893 | 16.9043  |
| AAELO15319  | hypothetical protein | 71.4832  | 71.589   | 89.6045  | 90.1008  | 53.2404  | 58.1657  | 51.7731  | 55.6309  |
| AAELO15451  | hypothetical protein | 7.83457  | 0        | 0        | 0        | 0        | 0        | 0        | 0.845134 |
| AAELO007855 | hypothetical protein | 19.4494  | 18.3982  | 18.2147  | 18.0457  | 10.9614  | 10.3983  | 0.256797 | 9.99333  |
| AAELO000309 | hypothetical protein | 7.64192  | 7.63636  | 4.38289  | 4.22402  | 11.4082  | 11.0004  | 0.327888 | 5.59035  |
| AAELO009476 | hypothetical protein | 0.906974 | 0.781909 | 0.817519 | 0.855729 | 20.4799  | 4.45541  | 640.899  | 270.173  |
| AAELO004539 | hypothetical protein | 12.0276  | 10.3131  | 12.605   | 7.09708  | 5.72023  | 0        | 0        | 0        |
| AAELO11884  | hypothetical protein | 0.16262  | 0        | 122.53   | 142.575  | 81.8078  | 114.422  | 0.386084 | 0.28569  |
| AAELO001284 | hypothetical protein | 7.18879  | 7.53738  | 6.48212  | 20.19    | 10.4874  | 9.06355  | 58.1933  | 35.4419  |
| AAELO001135 | hypothetical protein | 65.1591  | 33.7578  | 22.6394  | 40.0979  | 19.7539  | 42.4932  | 21.6438  | 50.0045  |
| AAELO005868 | hypothetical protein | 0.218762 | 0.12824  | 0.370208 | 0.426736 | 2.09644  | 1.99756  | 581.036  | 244.955  |
| AAELO006037 | hypothetical protein | 15.4182  | 14.6066  | 10.5083  | 13.9933  | 6.04913  | 6.36878  | 0.601322 | 8.61326  |
| AAELO14972  | hypothetical protein | 11.2252  | 25.8953  | 25.9693  | 43.6177  | 72.7723  | 79.8099  | 0.677377 | 6.21065  |

|            |                      |          |          |          |          |          |          |          |          |
|------------|----------------------|----------|----------|----------|----------|----------|----------|----------|----------|
| AAEL005922 | hypothetical protein | 84.137   | 78.8176  | 48.3128  | 64.5953  | 36.9892  | 37.5323  | 0.639422 | 47.0875  |
| AAEL007870 | hypothetical protein | 13.8145  | 7.81067  | 24.4426  | 22.2464  | 18.045   | 20.4222  | 0.599982 | 4.17411  |
| AAEL007872 | hypothetical protein | 0        | 0        | 0.071584 | 0        | 0.091822 | 0        | 62.4268  | 30.0478  |
| AAEL015046 | hypothetical protein | 11.6396  | 10.4212  | 17.1176  | 16.3497  | 9.26143  | 9.48214  | 3.35694  | 8.42012  |
| AAEL014451 | hypothetical protein | 37.5498  | 37.5932  | 37.9324  | 39.7411  | 78.9836  | 46.2294  | 10.6029  | 19.3283  |
| AAEL004831 | hypothetical protein | 10.3543  | 12.357   | 6.46055  | 8.59778  | 10.3638  | 10.5584  | 0.223457 | 6.42224  |
| AAEL010325 | hypothetical protein | 0.412553 | 0        | 0.149588 | 0.52992  | 0.543217 | 0        | 7.37783  | 0.362914 |
| AAEL012987 | hypothetical protein | 45.9103  | 48.8865  | 48.2506  | 52.3184  | 30.0818  | 30.695   | 24.9693  | 35.9351  |
| AAEL002612 | hypothetical protein | 3.61006  | 1.81224  | 1.40942  | 0.432421 | 9.16882  | 33.541   | 20.5554  | 9.05182  |
| AAEL006803 | hypothetical protein | 56.1586  | 56.0447  | 90.5657  | 84.6385  | 53.3256  | 61.5369  | 3.08352  | 26.8248  |
| AAEL011852 | hypothetical protein | 36.4771  | 29.7759  | 53.588   | 55.922   | 51.1209  | 48.5938  | 28.9851  | 35.3423  |
| AAEL015217 | hypothetical protein | 3.95795  | 4.22719  | 3.13486  | 3.5128   | 3.36931  | 3.41352  | 55.3999  | 24.1869  |
| AAEL006349 | hypothetical protein | 0.063276 | 0.076011 | 76.5232  | 42.3457  | 0.290214 | 0.251036 | 0.138162 | 0        |
| AAEL014335 | hypothetical protein | 6.22516  | 5.15536  | 9.73407  | 18.6951  | 9.7803   | 5.08519  | 63.8799  | 28.155   |
| AAEL002104 | hypothetical protein | 21.3965  | 21.4578  | 44.1294  | 35.7569  | 10.8376  | 11.6716  | 2.22652  | 11.6372  |
| AAEL006191 | hypothetical protein | 27.758   | 25.9039  | 15.8721  | 24.8407  | 16.926   | 17.3613  | 4.22609  | 43.0604  |
| AAEL012940 | hypothetical protein | 0.059523 | 0        | 0.210925 | 0.342566 | 0.518516 | 0.911735 | 151.299  | 70.2857  |
| AAEL009148 | hypothetical protein | 30.9343  | 27.6537  | 46.263   | 45.5162  | 12.2024  | 11.2626  | 99.6129  | 48.6913  |
| AAEL003376 | hypothetical protein | 34.6237  | 32.9825  | 47.5212  | 37.8577  | 25.7184  | 30.9241  | 15.3222  | 30.7236  |
| AAEL004498 | hypothetical protein | 445.534  | 502.371  | 266.382  | 237.314  | 1236.37  | 1296.23  | 236.778  | 329.425  |
| AAEL005357 | hypothetical protein | 71.1429  | 62.0661  | 45.0443  | 56.3722  | 31.4629  | 33.3833  | 26.1892  | 37.8054  |
| AAEL004787 | hypothetical protein | 29.3958  | 26.9769  | 31.6064  | 33.7671  | 39.4639  | 39.1203  | 3.65931  | 14.545   |
| AAEL013447 | hypothetical protein | 8.68139  | 9.57723  | 25.4238  | 47.1216  | 10.1868  | 9.54198  | 1.23185  | 4.54029  |
| AAEL008675 | hypothetical protein | 24.4824  | 17.0758  | 0.068441 | 0.358244 | 0.354381 | 0.855795 | 0        | 8.49452  |
| AAEL003186 | hypothetical protein | 0.150336 | 0.167998 | 0.112308 | 0.250319 | 1.03209  | 1.03006  | 131.546  | 64.9177  |
| AAEL011075 | hypothetical protein | 19.7229  | 23.1628  | 36.0513  | 38.1984  | 16.9655  | 16.6076  | 0        | 10.2267  |
| AAEL009408 | hypothetical protein | 28.1676  | 30.9687  | 22.5588  | 22.5382  | 23.2708  | 24.228   | 7.31716  | 22.0814  |
| AAEL012570 | hypothetical protein | 75.1184  | 140.597  | 25.498   | 11.8722  | 60.4445  | 60.4115  | 599.988  | 444.813  |
| AAEL003924 | hypothetical protein | 64.3605  | 65.7284  | 44.7115  | 47.235   | 71.8483  | 68.6283  | 68.8097  | 72.1453  |
| AAEL006130 | hypothetical protein | 12.2995  | 15.3923  | 7.56703  | 5.74112  | 23.9864  | 37.1247  | 142.638  | 49.159   |
| AAEL002685 | hypothetical protein | 11.0893  | 3.62495  | 14.0481  | 22.7403  | 5.80733  | 15.7835  | 0        | 0        |
| AAEL010690 | hypothetical protein | 37.6782  | 37.3884  | 44.1139  | 33.8387  | 39.7739  | 37.7339  | 28.3788  | 46.7268  |
| AAEL013706 | hypothetical protein | 9.20244  | 14.5476  | 3.91486  | 5.50859  | 5.43756  | 6.90095  | 0        | 33655.8  |
| AAEL006904 | hypothetical protein | 9.32124  | 10.7142  | 12.0395  | 11.9275  | 25.5505  | 16.4459  | 149.268  | 46.6075  |
| AAEL004489 | hypothetical protein | 39.9491  | 41.9808  | 63.309   | 53.137   | 35.0237  | 36.4795  | 11.8524  | 23.4408  |

|            |                      |          |          |          |          |          |          |          |          |
|------------|----------------------|----------|----------|----------|----------|----------|----------|----------|----------|
| AAEL001328 | hypothetical protein | 19.1197  | 24.3904  | 13.0053  | 12.6892  | 41.8759  | 36.8152  | 0.900884 | 10.5696  |
| AAEL001529 | hypothetical protein | 0.935828 | 5.96071  | 0.431158 | 0.539731 | 0.619639 | 0.945695 | 0.17253  | 0.623702 |
| AAEL004713 | hypothetical protein | 40.6841  | 42.7786  | 24.801   | 26.8593  | 48.1124  | 47.072   | 1.0005   | 11.1586  |
| AAEL000915 | hypothetical protein | 0.111213 | 0        | 0.288304 | 0.457816 | 0.675255 | 1.13903  | 391.286  | 151.409  |
| AAEL006493 | hypothetical protein | 0.107343 | 0.379053 | 0.895464 | 0.282774 | 1.99572  | 2.43283  | 369.816  | 131.084  |
| AAEL007850 | hypothetical protein | 13.6419  | 10.5238  | 14.9492  | 13.4939  | 21.0873  | 20.3588  | 3.10975  | 9.25384  |
| AAEL010634 | hypothetical protein | 160.553  | 126.741  | 38.7268  | 51.0038  | 320.748  | 332.267  | 2.49961  | 32.9847  |
| AAEL006015 | hypothetical protein | 36.5591  | 39.8293  | 77.1233  | 59.1193  | 14.8327  | 13.6253  | 7.10358  | 20.9557  |
| AAEL014542 | hypothetical protein | 43.5942  | 34.1059  | 93.7672  | 84.0034  | 21.6951  | 20.7201  | 18.4856  | 25.3594  |
| AAEL008415 | hypothetical protein | 15.2542  | 17.109   | 17.3746  | 17.7135  | 16.1558  | 16.68    | 0.202005 | 9.61606  |
| AAEL014268 | hypothetical protein | 2.26809  | 1.83509  | 0.283008 | 0.601769 | 0.513174 | 0.681588 | 139.878  | 34.2713  |
| AAEL005007 | hypothetical protein | 38.0291  | 42.9068  | 44.8862  | 44.0898  | 30.995   | 31.4133  | 14.9493  | 25.2992  |
| AAEL002235 | hypothetical protein | 27.7098  | 27.2201  | 31.3441  | 31.4293  | 24.2082  | 24.0873  | 10.1154  | 17.6422  |
| AAEL012178 | hypothetical protein | 6.80611  | 7.83491  | 14.2564  | 12.1565  | 3.29251  | 3.76305  | 0.443247 | 5.30694  |
| AAEL004792 | hypothetical protein | 80.0235  | 73.0835  | 44.1638  | 55.4801  | 113.482  | 113.153  | 15.0484  | 59.3024  |
| AAEL005214 | hypothetical protein | 28.5351  | 28.4245  | 35.0422  | 32.2435  | 32.4894  | 32.9323  | 12.7965  | 20.9233  |
| AAEL009352 | hypothetical protein | 21.2666  | 16.6353  | 0        | 60.4389  | 17.0292  | 17.6244  | 7.23686  | 11.446   |
| AAEL013827 | hypothetical protein | 118.873  | 114.661  | 22.3267  | 25.0761  | 99.7496  | 103.601  | 11.6483  | 53.2253  |
| AAEL002573 | hypothetical protein | 1.54213  | 4.08303  | 0.769117 | 0.825696 | 4.01019  | 2.47584  | 315.908  | 113.849  |
| AAEL000607 | hypothetical protein | 15.4908  | 14.1831  | 14.22    | 14.2216  | 40.8588  | 23.7886  | 216.425  | 88.6752  |
| AAEL006962 | hypothetical protein | 36.5649  | 37.2961  | 27.5375  | 20.3015  | 108.95   | 123.84   | 1.34466  | 17.1992  |
| AAEL006392 | hypothetical protein | 42.9246  | 38.3485  | 39.5972  | 34.9577  | 42.32    | 47.6468  | 0.74675  | 18.2986  |
| AAEL013484 | hypothetical protein | 10.1436  | 17.1947  | 40.415   | 34.6686  | 450.44   | 370.423  | 208.477  | 56.8353  |
| AAEL015247 | hypothetical protein | 0        | 0        | 0        | 0.057664 | 0.306413 | 0.730329 | 42.9912  | 17.0216  |
| AAEL003932 | hypothetical protein | 16.8721  | 15.8812  | 14.137   | 15.3423  | 17.6043  | 17.7872  | 5.94485  | 12.6933  |
| AAEL014599 | hypothetical protein | 21.2062  | 24.8069  | 1.53971  | 1.91376  | 9.02983  | 5.39372  | 2.12215  | 8.98973  |
| AAEL012504 | hypothetical protein | 58.593   | 56.2443  | 99.0937  | 73.1101  | 28.4933  | 34.6807  | 121.087  | 84.0583  |
| AAEL000727 | hypothetical protein | 22.3625  | 23.454   | 26.7263  | 27.1818  | 21.4677  | 21.6608  | 6.74575  | 13.6905  |
| AAEL008808 | hypothetical protein | 24.7395  | 18.9261  | 22.0182  | 19.6864  | 18.807   | 23.0748  | 1.02832  | 12.8406  |
| AAEL007553 | hypothetical protein | 47.6054  | 40.6914  | 34.0158  | 45.048   | 68.9998  | 41.1376  | 151.547  | 116.573  |
| AAEL002923 | hypothetical protein | 16.3339  | 6.68343  | 1.21024  | 3.18605  | 7.59338  | 4.65461  | 21.7888  | 12.9961  |
| AAEL001392 | hypothetical protein | 5.92389  | 9.01583  | 12.5493  | 27.8438  | 21.8202  | 94.2669  | 0.80163  | 29.5922  |
| AAEL011385 | hypothetical protein | 19.9844  | 20.3745  | 34.8601  | 28.1829  | 14.5997  | 14.3345  | 6.87764  | 13.6763  |
| AAEL001927 | hypothetical protein | 27.2018  | 26.1202  | 44.233   | 37.374   | 18.1326  | 18.8763  | 19.5519  | 26.0117  |
| AAEL008797 | hypothetical protein | 0.094597 | 0.437031 | 1.7265   | 94.4905  | 0.825232 | 0.567082 | 0        | 0.08168  |



|            |                      |          |          |          |          |          |          |          |          |
|------------|----------------------|----------|----------|----------|----------|----------|----------|----------|----------|
| AAELO00968 | hypothetical protein | 2.69097  | 3.24962  | 14.0281  | 8.94017  | 1.00404  | 0.594576 | 0.097373 | 3.17975  |
| AAELO08395 | hypothetical protein | 10.0866  | 10.242   | 14.7816  | 12.7592  | 13.012   | 12.4533  | 1.18843  | 6.01278  |
| AAELO07837 | hypothetical protein | 28.0635  | 25.222   | 61.4168  | 58.9824  | 20.4866  | 22.6241  | 6.13683  | 14.9069  |
| AAELO09256 | hypothetical protein | 11.6865  | 8.72399  | 14.1211  | 10.7857  | 5.89166  | 5.67531  | 1.71887  | 8.03172  |
| AAELO06233 | hypothetical protein | 10.1386  | 12.8226  | 4.30466  | 1.80909  | 12.8893  | 2.10207  | 62.3947  | 35.7328  |
| AAELO05554 | hypothetical protein | 11.0287  | 14.2522  | 16.0533  | 15.3754  | 18.8167  | 18.2148  | 0        | 9.77796  |
| AAELO03080 | hypothetical protein | 29.4913  | 36.411   | 26.2524  | 27.4575  | 21.1034  | 24.3369  | 14.8973  | 22.983   |
| AAELO13311 | hypothetical protein | 15.4951  | 13.1924  | 30.9609  | 21.0786  | 16.8973  | 13.8412  | 1.17043  | 5.13675  |
| AAELO11728 | hypothetical protein | 0.195399 | 0.453231 | 119.076  | 6.81969  | 0.356536 | 0.193419 | 0        | 0.342987 |
| AAELO02059 | hypothetical protein | 23.8676  | 25.5447  | 39.8829  | 36.948   | 16.5201  | 18.8717  | 8.42543  | 15.0411  |
| AAELO02327 | hypothetical protein | 10.7268  | 11.7886  | 23.8747  | 21.1361  | 14.8166  | 15.6094  | 75.9534  | 32.2932  |
| AAELO03848 | hypothetical protein | 0.647911 | 0.496579 | 0        | 0.369372 | 0.767346 | 1.24481  | 332.383  | 147.213  |
| AAELO07391 | hypothetical protein | 0        | 0        | 0.585318 | 0.136908 | 1.02058  | 2.38576  | 226.907  | 94.6543  |
| AAELO01454 | hypothetical protein | 32.1358  | 28.2511  | 31.5263  | 31.3084  | 24.5364  | 26.7552  | 7.12966  | 17.289   |
| AAELO00322 | hypothetical protein | 9.13352  | 9.10625  | 10.2291  | 19.8699  | 6.91659  | 8.26935  | 1.92769  | 6.95608  |
| AAELO07479 | hypothetical protein | 26.5686  | 31.7877  | 78.4479  | 48.6875  | 25.4655  | 21.9635  | 8.61041  | 21.5702  |
| AAELO10211 | hypothetical protein | 19.0016  | 17.7363  | 22.1783  | 21.4237  | 8.42081  | 8.73108  | 3.19654  | 9.45975  |
| AAELO07053 | hypothetical protein | 13.3844  | 12.035   | 15.2024  | 15.4016  | 14.2392  | 15.0665  | 0.149927 | 12.0958  |
| AAELO02473 | hypothetical protein | 351.18   | 309.827  | 470.966  | 548.476  | 144.118  | 171.274  | 3.64848  | 122.091  |
| AAELO00565 | hypothetical protein | 51.5482  | 52.8157  | 31.8882  | 42.5201  | 39.0244  | 39.5326  | 11.1788  | 31.314   |
| AAELO05623 | hypothetical protein | 0        | 0        | 0        | 0        | 0        | 0.166766 | 10.5631  | 2.03144  |
| AAELO07440 | hypothetical protein | 0        | 0.055507 | 9.51281  | 28.8948  | 0.042586 | 0        | 0        | 0        |
| AAELO11254 | hypothetical protein | 14.1613  | 14.626   | 13.3805  | 14.0922  | 49.2291  | 25.3553  | 72.1757  | 33.4935  |
| AAELO03531 | hypothetical protein | 17.0976  | 16.1472  | 20.7592  | 18.6644  | 16.5274  | 16.5845  | 6.94098  | 17.0093  |
| AAELO08617 | hypothetical protein | 18.3487  | 18.8932  | 9.83533  | 14.197   | 20.2062  | 19.6834  | 4.57342  | 10.109   |
| AAELO04851 | hypothetical protein | 508.282  | 522.1    | 255.077  | 234.103  | 1425.89  | 1501.84  | 964.217  | 860.992  |
| AAELO10818 | hypothetical protein | 246.227  | 266.257  | 281.849  | 232.463  | 593.827  | 588.353  | 453.522  | 357.752  |
| AAELO07206 | hypothetical protein | 9.92344  | 15.3084  | 30.3386  | 35.0957  | 15.6479  | 13.7312  | 81.872   | 33.4852  |
| AAELO01939 | hypothetical protein | 32.5275  | 31.9156  | 80.6852  | 43.9001  | 26.5347  | 27.1694  | 5.68714  | 21.1046  |
| AAELO00604 | hypothetical protein | 91.5385  | 83.1082  | 211.434  | 227.667  | 58.9174  | 63.4411  | 36.1465  | 63.9231  |
| AAELO08729 | hypothetical protein | 10.0226  | 7.57806  | 12.696   | 11.5983  | 8.79468  | 8.19244  | 0.467198 | 8.37594  |
| AAELO10699 | hypothetical protein | 24.5725  | 25.3841  | 63.0048  | 67.0566  | 19.6543  | 21.0657  | 0.185123 | 12.8079  |
| AAELO13634 | hypothetical protein | 26.3734  | 30.9572  | 17.079   | 17.6564  | 19.2999  | 17.7766  | 7.52303  | 14.7035  |
| AAELO06556 | hypothetical protein | 13.6824  | 10.0422  | 33.9726  | 25.9772  | 6.68159  | 5.32837  | 0.193878 | 5.44075  |
| AAELO11398 | hypothetical protein | 40.617   | 41.2144  | 49.5779  | 34.3471  | 48.0274  | 44.983   | 1.05622  | 15.5929  |

|            |                      |         |          |          |         |          |          |          |         |
|------------|----------------------|---------|----------|----------|---------|----------|----------|----------|---------|
| AAELO01186 | hypothetical protein | 7.59987 | 8.23884  | 5.57205  | 6.00036 | 10.5687  | 10.9987  | 49.1856  | 21.2413 |
| AAELO00429 | hypothetical protein | 10.8196 | 11.5552  | 11.2149  | 12.4196 | 9.81478  | 11.0424  | 1.26857  | 6.89829 |
| AAELO10914 | hypothetical protein | 10.1102 | 9.56867  | 13.0412  | 11.9041 | 5.88056  | 5.63476  | 56.7902  | 21.9723 |
| AAELO06825 | hypothetical protein | 1.52398 | 1.57814  | 3.45795  | 1.95209 | 0.866507 | 1.00389  | 0.289198 | 9.73863 |
| AAELO06146 | hypothetical protein | 9.51614 | 10.5733  | 16.5225  | 14.4584 | 11.9063  | 12.7215  | 2.44129  | 7.5633  |
| AAELO15453 | hypothetical protein | 6.73421 | 4.47453  | 6.9647   | 8.27172 | 5.94408  | 5.93197  | 0.362437 | 4.08482 |
| AAELO05332 | hypothetical protein | 109.519 | 116.968  | 56.9445  | 58.0349 | 359.829  | 268.506  | 186.543  | 147.37  |
| AAELO04718 | hypothetical protein | 8.37708 | 9.96829  | 17.7594  | 13.784  | 4.68702  | 5.19998  | 1.18162  | 5.58135 |
| AAELO12856 | hypothetical protein | 67.1987 | 43.6549  | 6.10951  | 11.4933 | 142.01   | 89.8425  | 4.46184  | 11.0596 |
| AAELO09811 | hypothetical protein | 17.8107 | 16.7545  | 20.9549  | 15.8547 | 13.1497  | 10.3784  | 19.7368  | 28.6054 |
| AAELO10271 | hypothetical protein | 47.0041 | 52.2053  | 26.8739  | 33.3373 | 48.5287  | 56.0666  | 18.0875  | 33.6691 |
| AAELO00537 | hypothetical protein | 16.7846 | 0.236893 | 37.2964  | 6.92048 | 12.9569  | 0.098637 | 0        | 14.8314 |
| AAELO02093 | hypothetical protein | 17.0717 | 16.3999  | 17.852   | 18.1245 | 14.5601  | 16.7813  | 2.4312   | 7.28764 |
| AAELO09150 | hypothetical protein | 45.9188 | 46.0018  | 71.1961  | 65.7294 | 41.2446  | 45.3153  | 579.166  | 270.428 |
| AAELO04356 | hypothetical protein | 28.3847 | 27.2487  | 44.2391  | 36.2144 | 23.2628  | 22.9663  | 9.97914  | 19.1614 |
| AAELO06983 | hypothetical protein | 17.6167 | 18.516   | 35.1468  | 24.3299 | 19.511   | 20.1752  | 1.57526  | 10.6783 |
| AAELO03404 | hypothetical protein | 320.256 | 303.184  | 580.313  | 354.616 | 158.246  | 163.277  | 3.42066  | 105.958 |
| AAELO02920 | hypothetical protein | 7.25512 | 0        | 0.336836 | 0       | 0.323923 | 0.70679  | 1.37658  | 2.91097 |
| AAELO12602 | hypothetical protein | 33.1635 | 31.5824  | 17.7107  | 26.0498 | 34.6025  | 32.5735  | 13.9065  | 23.3012 |
| AAELO03159 | hypothetical protein | 24.9006 | 26.3771  | 36.8095  | 34.013  | 29.6918  | 29.6948  | 3.60301  | 13.6945 |
| AAELO03842 | hypothetical protein | 8.48317 | 6.97995  | 3.61784  | 3.50506 | 10.2519  | 9.18581  | 48.1872  | 18.2676 |
| AAELO09973 | hypothetical protein | 33.2849 | 30.8105  | 74.4642  | 72.5057 | 21.8564  | 23.3141  | 0.771339 | 22.6973 |
| AAELO02492 | hypothetical protein | 20.6285 | 20.474   | 4.74441  | 6.86113 | 58.3839  | 29.2518  | 54.9431  | 20.4978 |
| AAELO00252 | hypothetical protein | 41.7767 | 46.8784  | 13.5836  | 18.5841 | 37.9327  | 44.631   | 0.200601 | 4.95428 |
| AAELO01949 | hypothetical protein | 19.548  | 22.9721  | 15.5495  | 12.7979 | 20.5473  | 22.6892  | 0.578082 | 4.63766 |
| AAELO02889 | hypothetical protein | 133.993 | 2.50556  | 2.27457  | 1.52828 | 0.817833 | 4.76359  | 503.993  | 37.3961 |
| AAELO07676 | hypothetical protein | 35.4784 | 31.4326  | 49.1674  | 47.0703 | 53.0137  | 55.93    | 2.41211  | 18.8818 |
| AAELO00079 | hypothetical protein | 25.9473 | 25.5067  | 34.3238  | 30.3065 | 28.6395  | 29.0076  | 1.51859  | 14.0334 |
| AAELO00365 | hypothetical protein | 46.4081 | 46.4838  | 32.9716  | 34.9825 | 42.3371  | 40.9653  | 13.0622  | 27.5903 |
| AAELO10770 | hypothetical protein | 11.5853 | 11.6765  | 11.9934  | 11.3459 | 18.5187  | 16.8297  | 1.51764  | 8.56004 |
| AAELO04140 | hypothetical protein | 58.951  | 55.1162  | 54.0537  | 45.6759 | 57.1091  | 56.6455  | 353.998  | 166.135 |
| AAELO13293 | hypothetical protein | 2.97354 | 3.82022  | 1.79573  | 3.29131 | 4.51496  | 4.557    | 1.77583  | 6.56474 |
| AAELO05501 | hypothetical protein | 26.3734 | 22.9253  | 34.3165  | 53.1409 | 5.63183  | 7.12033  | 4.20463  | 13.667  |
| AAELO02205 | hypothetical protein | 85.9976 | 86.9731  | 46.2819  | 58.3849 | 75.5498  | 68.7867  | 26.6144  | 54.3415 |
| AAELO06761 | hypothetical protein | 6.61145 | 6.21351  | 31.9505  | 58.8597 | 3.90701  | 3.69989  | 0.444243 | 3.85351 |

|            |                      |          |          |          |          |          |          |          |          |
|------------|----------------------|----------|----------|----------|----------|----------|----------|----------|----------|
| AAEL013204 | hypothetical protein | 8.73033  | 10.6625  | 23.3985  | 18.6665  | 14.7389  | 15.1222  | 0.05859  | 5.72671  |
| AAEL009840 | hypothetical protein | 0        | 0        | 0.297607 | 0.043007 | 1.54911  | 0.924509 | 111.18   | 46.2283  |
| AAEL007014 | hypothetical protein | 0.321632 | 0        | 79.4661  | 596.35   | 0        | 0.306825 | 0.349369 | 0        |
| AAEL008586 | hypothetical protein | 26.2537  | 31.8825  | 30.5233  | 26.1282  | 14.0607  | 15.0065  | 11.2046  | 18.2883  |
| AAEL012018 | hypothetical protein | 98.1165  | 102.789  | 73.669   | 81.6836  | 110.885  | 117.158  | 2.06426  | 49.7859  |
| AAEL000786 | hypothetical protein | 70.6978  | 75.7554  | 24.7144  | 14.88    | 85.0177  | 78.8279  | 1.98802  | 31.8309  |
| AAEL005172 | hypothetical protein | 23.0897  | 23.0165  | 67.2405  | 41.1222  | 21.7719  | 23.903   | 238.742  | 91.4707  |
| AAEL005498 | hypothetical protein | 85.5723  | 88.4844  | 123.939  | 124.595  | 79.5533  | 90.6377  | 37.2838  | 57.9816  |
| AAEL007368 | hypothetical protein | 18.4073  | 18.2643  | 30.5232  | 26.3659  | 18.3924  | 19.0937  | 4.16345  | 9.67464  |
| AAEL003005 | hypothetical protein | 27.5209  | 23.7053  | 30.8761  | 46.0759  | 29.9003  | 31.9077  | 9.31365  | 16.1116  |
| AAEL005295 | hypothetical protein | 9.54927  | 9.22924  | 14.799   | 12.8728  | 6.26101  | 4.63837  | 0.403918 | 3.99392  |
| AAEL008019 | hypothetical protein | 2.57475  | 1.9512   | 2.25782  | 3.27551  | 3.57116  | 4.8324   | 81.1311  | 39.8406  |
| AAEL007905 | hypothetical protein | 42.6699  | 44.2814  | 22.8052  | 28.6829  | 42.4629  | 42.7084  | 5.81816  | 24.3177  |
| AAEL010014 | hypothetical protein | 0.049802 | 0.050523 | 0.0939   | 0.090159 | 0.850408 | 0.555254 | 57.6865  | 23.869   |
| AAEL005153 | hypothetical protein | 25.2085  | 33.5419  | 15.2062  | 23.166   | 32.6783  | 35.2473  | 0        | 12.8261  |
| AAEL007663 | hypothetical protein | 29.6719  | 32.0855  | 22.6548  | 25.1099  | 47.749   | 52.4291  | 14.3989  | 25.7479  |
| AAEL012878 | hypothetical protein | 10.3377  | 13.3624  | 46.2826  | 28.3325  | 8.64463  | 8.5562   | 3.65526  | 6.97841  |
| AAEL004274 | hypothetical protein | 32.9833  | 34.587   | 50.3495  | 42.297   | 27.4333  | 28.065   | 8.36177  | 19.5485  |
| AAEL000353 | hypothetical protein | 0.21015  | 0.343593 | 55.4157  | 22.152   | 0        | 0        | 0        | 0.183085 |
| AAEL000539 | hypothetical protein | 21.9316  | 38.3621  | 42.5177  | 38.5037  | 56.5262  | 48.594   | 124.532  | 46.3527  |
| AAEL003878 | hypothetical protein | 18.9692  | 19.366   | 29.0568  | 21.702   | 26.5504  | 23.2234  | 1.44918  | 11.7953  |
| AAEL004104 | hypothetical protein | 24.3833  | 19.3531  | 28.0153  | 23.1073  | 13.7976  | 12.8412  | 0.292094 | 10.5794  |
| AAEL004136 | hypothetical protein | 12.5395  | 11.6317  | 14.0118  | 12.2341  | 8.82705  | 10.0723  | 0.333859 | 6.30946  |
| AAEL004318 | hypothetical protein | 29.8946  | 32.0643  | 24.3949  | 23.2433  | 33.2967  | 36.5641  | 0.429142 | 17.2557  |
| AAEL004934 | hypothetical protein | 13.3283  | 13.1461  | 14.9709  | 13.3517  | 16.8077  | 15.7349  | 3.47912  | 8.386    |
| AAEL005117 | hypothetical protein | 93.7422  | 107.929  | 13.9211  | 16.1136  | 37.135   | 33.065   | 14.8498  | 66.0674  |
| AAEL006602 | hypothetical protein | 97.7     | 81.1542  | 2.61359  | 1.85991  | 11.7886  | 9.58764  | 25.0667  | 44.6029  |
| AAEL007166 | hypothetical protein | 162.108  | 142.556  | 151.411  | 160.424  | 231.025  | 232.653  | 42.0347  | 96.0027  |
| AAEL007611 | hypothetical protein | 2.62898  | 2.55218  | 2.99601  | 3.63019  | 2.90587  | 2.94161  | 53.9524  | 24.3805  |
| AAEL007867 | hypothetical protein | 40.7958  | 38.2789  | 47.215   | 48.7612  | 44.4474  | 43.2355  | 19.3163  | 29.2593  |
| AAEL008433 | hypothetical protein | 5.6439   | 9.08336  | 5.04334  | 7.04962  | 9.66228  | 7.40881  | 0        | 6.4628   |
| AAEL008441 | hypothetical protein | 1.12917  | 2.68944  | 4.38176  | 4.85525  | 41.3782  | 13.8563  | 6308.31  | 2607.72  |
| AAEL009047 | hypothetical protein | 48.4029  | 47.1474  | 53.7727  | 57.3115  | 29.9591  | 31.4867  | 28.5515  | 35.6938  |
| AAEL009346 | hypothetical protein | 4.89704  | 5.34389  | 5.23182  | 13.8753  | 11.9338  | 11.4023  | 58.6261  | 25.2848  |
| AAEL009504 | hypothetical protein | 27.7807  | 26.1267  | 63.7637  | 44.0629  | 19.8663  | 18.7454  | 0.308132 | 13.0523  |

|             |                                              |         |          |          |         |         |          |          |         |
|-------------|----------------------------------------------|---------|----------|----------|---------|---------|----------|----------|---------|
| AAELO009725 | hypothetical protein                         | 12.1449 | 11.6506  | 13.7583  | 12.7173 | 11.6282 | 12.5907  | 3.38522  | 9.01773 |
| AAELO11143  | hypothetical protein                         | 27.0688 | 26.8361  | 40.5282  | 34.7676 | 22.9516 | 22.5724  | 5.87269  | 16.1888 |
| AAELO11351  | hypothetical protein                         | 16.4201 | 17.8349  | 19.3177  | 20.6098 | 22.9264 | 24.4694  | 0.213382 | 9.56589 |
| AAELO11525  | hypothetical protein                         | 10.7072 | 7.76774  | 14.3461  | 6.7915  | 14.9747 | 3.64     | 38.6365  | 30.5014 |
| AAELO12127  | hypothetical protein                         | 50.4462 | 79.7827  | 58.7152  | 90.283  | 56.0906 | 57.339   | 80.6338  | 47.4744 |
| AAELO13292  | hypothetical protein                         | 18.7443 | 18.233   | 24.233   | 20.2137 | 26.4678 | 28.724   | 6.41561  | 15.3305 |
| AAELO15289  | hypothetical protein                         | 0       | 0.024063 | 0.051908 | 8.99526 | 0       | 0.020849 | 0        | 0       |
| AAELO07875  | hypothetical protein                         | 132.182 | 134.482  | 118.395  | 137.265 | 83.2812 | 80.2647  | 1.97821  | 71.7221 |
| AAELO08399  | hypothetical protein                         | 21.3069 | 22.1156  | 31.448   | 28.3069 | 19.7671 | 19.7358  | 2.03783  | 11.3967 |
| AAELO06149  | hypothetical protein                         | 23.2625 | 23.3143  | 36.6366  | 34.2049 | 19.6774 | 19.9605  | 10.7274  | 18.0145 |
| AAELO06279  | hypothetical protein                         | 43.7516 | 40.3718  | 40.2127  | 48.6434 | 14.9882 | 17.3973  | 8.20726  | 24.4781 |
| AAELO14338  | hypothetical protein                         | 40.5368 | 30.3943  | 45.1308  | 40.3163 | 32.2224 | 35.5378  | 0        | 5.22262 |
| AAELO05115  | hypothetical protein                         | 40.3026 | 36.4866  | 106.061  | 94.4864 | 30.7146 | 33.3446  | 0.516481 | 18.5443 |
| AAELO11319  | hypothetical protein                         | 4.87662 | 10.1005  | 35.1352  | 42.4746 | 176.236 | 158.212  | 37.6711  | 12.3645 |
| AAELO11598  | hypothetical protein                         | 1.34554 | 1.50514  | 38.7764  | 24.9276 | 1.79596 | 1.4392   | 166.049  | 79.8333 |
| AAELO09234  | hypothetical protein                         | 36.8307 | 32.0984  | 53.8915  | 53.2218 | 25.9429 | 27.2251  | 1.51563  | 19.5931 |
| AAELO09188  | hypothetical protein                         | 8.35678 | 9.8314   | 10.3524  | 9.64559 | 19.8675 | 24.5502  | 130.785  | 50.3795 |
| AAELO06569  | hypothetical protein                         | 7.46689 | 9.37875  | 4.64252  | 7.04834 | 9.20025 | 8.92692  | 15.8024  | 22.4221 |
| AAELO10394  | hypothetical protein                         | 30.0751 | 47.3954  | 25.221   | 29.546  | 46.1417 | 39.7925  | 48.1921  | 40.9796 |
| AAELO07680  | hypothetical protein                         | 12.4892 | 8.55429  | 8.5238   | 19.9623 | 53.726  | 55.1141  | 11.7095  | 18.5916 |
| AAELO12516  | hypothetical protein                         | 31.0482 | 30.7299  | 38.6273  | 34.513  | 33.4605 | 32.4936  | 8.93734  | 19.035  |
| AAELO09542  | hypothetical protein                         | 12.8219 | 10.5431  | 10.2339  | 7.83432 | 13.5107 | 15.2248  | 2.30765  | 7.06423 |
| AAELO11582  | hypothetical protein                         | 22.6627 | 22.8385  | 37.5025  | 32.3565 | 11.8834 | 11.086   | 0.169493 | 9.05408 |
| AAELO09074  | IAP1                                         | 88.6934 | 86.3576  | 71.0882  | 72.2922 | 123.868 | 101.916  | 376.425  | 185.28  |
| AAELO06633  | IAP2                                         | 28.943  | 28.2102  | 15.3092  | 20.2304 | 26.1513 | 24.5321  | 15.1446  | 21.7545 |
| AAELO14251  | IAP5                                         | 23.6061 | 19.7428  | 49.781   | 39.6849 | 15.0359 | 17.4467  | 4.76864  | 21.614  |
| AAELO06876  | igf2 mRNA binding protein, putative          | 120.132 | 115.801  | 176.167  | 169.444 | 119.043 | 125.576  | 5.32469  | 44.5253 |
| AAELO01965  | imaginal disc growth factor                  | 106.606 | 137.01   | 30.1454  | 23.1803 | 134.795 | 133.455  | 22.6023  | 42.0521 |
| AAELO02023  | imaginal disc growth factor                  | 196.54  | 218.911  | 321.492  | 288.632 | 247.633 | 254.94   | 34.9142  | 116.717 |
| AAELO00141  | immunophilin FKBP46, putative                | 22.1172 | 20.8501  | 31.7705  | 25.7318 | 8.94827 | 8.51351  | 1.39301  | 10.7011 |
| AAELO05390  | importin                                     | 26.9061 | 25.4489  | 19.6176  | 22.1786 | 18.6458 | 19.3482  | 8.05362  | 16.686  |
| AAELO04035  | importin 11 (imp11) (ran-binding protein 11) | 87.4487 | 83.3961  | 105.852  | 99.1877 | 49.3788 | 50.6922  | 11.4146  | 47.4047 |
| AAELO09080  | importin 7, putative                         | 121.703 | 130.912  | 81.3938  | 74.8831 | 215.311 | 197.899  | 44.8473  | 87.4167 |
| AAELO04441  | importin 9 (imp9) (ran-binding protein 9)    | 34.6633 | 30.1155  | 39.6124  | 46.0076 | 31.6549 | 32.8429  | 8.50302  | 20.3458 |

|            |                                                 |          |          |          |          |          |          |         |          |
|------------|-------------------------------------------------|----------|----------|----------|----------|----------|----------|---------|----------|
| AAELO11657 | importin alpha                                  | 93.9355  | 98.9146  | 88.778   | 76.0892  | 125.408  | 121.655  | 69.1927 | 79.3684  |
| AAELO12960 | importin alpha                                  | 163.158  | 156.765  | 195.48   | 250.409  | 76.2268  | 80.1708  | 7.07287 | 93.8678  |
| AAELO13275 | importin beta-1                                 | 61.2004  | 61.5081  | 104.073  | 93.5028  | 45.8532  | 47.3304  | 15.3761 | 34.6471  |
| AAELO07521 | importin beta-2                                 | 54.2312  | 54.8052  | 104.567  | 57.3192  | 58.5726  | 62.5062  | 31.7831 | 35.6226  |
| AAELO10698 | importin beta-4                                 | 98.7004  | 101.636  | 52.761   | 61.5889  | 85.5571  | 85.9532  | 37.8366 | 63.3241  |
| AAELO03650 | Inhibitor of growth protein, ingl               | 15.4589  | 15.3258  | 23.4054  | 24.0182  | 9.8217   | 9.53178  | 5.77947 | 11.7732  |
| AAELO03835 | initiation factor 5a                            | 546.966  | 593.935  | 415.574  | 359.468  | 868.797  | 856.762  | 550.243 | 509.117  |
| AAELO03193 | inorganic pyrophosphatase                       | 93.7373  | 99.4389  | 98.0005  | 68.5411  | 98.9228  | 97.9687  | 167.337 | 108.812  |
| AAELO09273 | inosine-5-monophosphate dehydrogenase           | 37.4352  | 39.2605  | 58.6114  | 45.0283  | 31.3398  | 29.853   | 14.8977 | 28.1121  |
| AAELO14719 | inosine-uridine preferring nucleoside hydrolase | 9.94722  | 9.14077  | 4.71362  | 32.2091  | 5.93419  | 5.92344  | 306.814 | 125.387  |
| AAELO02176 | inosine-uridine preferring nucleoside hydrolase | 3.25347  | 4.56979  | 4.51627  | 15.4921  | 4.72295  | 4.5993   | 7.31408 | 5.85523  |
| AAELO06485 | inosine-uridine preferring nucleoside hydrolase | 0.193437 | 0        | 0.787837 | 2.86295  | 0.044055 | 0.19083  | 6.22804 | 0.157544 |
| AAELO10766 | inositol triphosphate 3-kinase c                | 102.064  | 93.7339  | 194.391  | 154.206  | 56.0574  | 50.2046  | 7.98484 | 52.4945  |
| AAELO00273 | inositol triphosphate 3-kinase c                | 21.9027  | 21.0354  | 24.053   | 32.4807  | 35.4746  | 29.4297  | 117.861 | 59.9705  |
| AAELO07457 | insect origin recognition complex subunit       | 53.7801  | 54.8321  | 70.1229  | 67.6225  | 50.7151  | 51.9693  | 29.4879 | 39.6828  |
| AAELO14250 | insect replication protein a                    | 23.5835  | 22.4041  | 19.5996  | 25.5806  | 10.8582  | 9.23072  | 6.49559 | 18.3226  |
| AAELO11038 | integrin alpha-ps                               | 0.80419  | 0.628498 | 2.4057   | 1.13397  | 4.39588  | 1.17946  | 53.7719 | 17.193   |
| AAELO12466 | integrin beta subunit                           | 16.9829  | 17.0801  | 17.7035  | 11.2789  | 13.0463  | 11.6868  | 127.491 | 40.0506  |
| AAELO06048 | interleukin enhancer binding factor             | 42.8635  | 48.4974  | 52.8985  | 37.0041  | 42.5919  | 43.2165  | 14.9942 | 32.7718  |
| AAELO15636 | interleukin enhancer binding factor             | 27.3201  | 30.7262  | 40.4595  | 28.4922  | 27.4521  | 30.0167  | 9.59549 | 21.5804  |
| AAELO05221 | internalin A, putative                          | 63.3643  | 50.6635  | 99.6232  | 178.322  | 98.5417  | 85.4915  | 1420.74 | 591.057  |
| AAELO14847 | inx2                                            | 120.579  | 116.319  | 42.5127  | 35.4925  | 46.7122  | 48.2288  | 357.191 | 216.207  |
| AAELO06726 | inx4                                            | 136.859  | 141.069  | 50.7492  | 67.9682  | 117.133  | 114.701  | 1.99687 | 63.2131  |
| AAELO08588 | inx7                                            | 0.109676 | 0.065515 | 0.300805 | 0.246125 | 1.64743  | 1.6128   | 313.684 | 157.222  |
| AAELO08117 | ion channel nompc                               | 0.135573 | 0        | 0.083384 | 0.053539 | 1.92326  | 0.214245 | 61.0802 | 24.4409  |
| AAELO06144 | isopentenyl-diphosphate delta isomerase         | 22.1501  | 25.2672  | 20.4807  | 21.0999  | 28.434   | 27.3615  | 13.0594 | 19.7385  |
| AAELO08634 | jnk                                             | 61.3924  | 57.1     | 105.636  | 85.949   | 48.6838  | 47.0022  | 16.6977 | 38.231   |
| AAELO03505 | jun                                             | 6.53344  | 6.63351  | 12.9349  | 15.6976  | 50.8311  | 17.3794  | 105.897 | 46.6271  |
| AAELO05178 | juvenile hormone esterase                       | 20.448   | 26.8372  | 3.27862  | 3.16071  | 23.4952  | 17.3227  | 0.54271 | 10.9928  |
| AAELO14438 | Juvenile hormone-inducible protein, putative    | 0.420158 | 0.62122  | 1.40469  | 0.740118 | 20.693   | 0.772409 | 38.5418 | 16.712   |

|             |                                                                                      |          |          |          |          |          |          |          |         |
|-------------|--------------------------------------------------------------------------------------|----------|----------|----------|----------|----------|----------|----------|---------|
| AAELO14435  | Juvenile hormone-inducible protein, putative                                         | 0.428282 | 0.644431 | 0.347976 | 0.330251 | 6.34742  | 0.503258 | 2.91924  | 3.02341 |
| AAELO003954 | Juvenile hormone-inducible protein, putative                                         | 0.744004 | 0.688132 | 7.46576  | 11.2597  | 11.298   | 3.16582  | 161.494  | 66.5164 |
| AAELO001833 | Juvenile hormone-inducible protein, putative                                         | 4.75278  | 4.6931   | 3.87416  | 3.1676   | 62.4581  | 8.4229   | 20.3381  | 11.295  |
| AAELO004242 | Juvenile hormone-inducible protein, putative                                         | 5.83936  | 6.85622  | 16.1297  | 9.37287  | 7.0236   | 8.19505  | 48.6034  | 19.6706 |
| AAELO000516 | Juvenile hormone-inducible protein, putative                                         | 1.7252   | 2.46616  | 4.26386  | 7.04244  | 16.9184  | 10.6533  | 154.349  | 74.2024 |
| AAELO14440  | Juvenile hormone-inducible protein, putative                                         | 64.5477  | 62.3378  | 56.6307  | 64.281   | 44.4787  | 44.3435  | 1.39332  | 23.9662 |
| AAELO005827 | katanin P80 subunit                                                                  | 23.8493  | 24.6435  | 56.6772  | 49.0706  | 16.0602  | 17.6248  | 5.54281  | 14.7353 |
| AAELO10118  | kelch repeat protein                                                                 | 21.8877  | 21.6883  | 23.4785  | 20.3651  | 21.275   | 20.8238  | 4.31775  | 14.5816 |
| AAELO009227 | kinesin heavy chain                                                                  | 7.50437  | 6.45684  | 11.5618  | 11.8176  | 7.74758  | 7.28783  | 0.641595 | 4.96268 |
| AAELO008542 | kinesin heavy chain subunit                                                          | 68.8912  | 68.272   | 87.5652  | 67.6     | 60.2194  | 59.9203  | 59.3114  | 54.7109 |
| AAELO002714 | kinesin-like protein KIF23 (mitotic kinesin-like protein 1) (kinesin-like protein 5) | 23.4614  | 22.0171  | 33.1006  | 31.285   | 23.594   | 23.5343  | 3.12611  | 16.47   |
| AAELO004235 | kinesin-like protein Klp10A                                                          | 55.7554  | 54.8519  | 85.5507  | 80.6238  | 58.121   | 0        | 30.6494  | 35.7277 |
| AAELO008928 | Kir2A                                                                                | 37.0257  | 35.4586  | 44.8294  | 35.1387  | 59.7013  | 61.659   | 121.265  | 61.0628 |
| AAELO001646 | Kir3                                                                                 | 0.258039 | 0.037834 | 0.093597 | 0        | 0.995048 | 0.161842 | 88.6362  | 23.0123 |
| AAELO008879 | kynurenine 3-monooxygenase                                                           | 15.0749  | 13.5212  | 14.5676  | 14.1644  | 21.7683  | 22.2004  | 418.341  | 140.879 |
| AAELO009295 | lachesin                                                                             | 12.6401  | 11.8979  | 24.4895  | 12.0325  | 6.42767  | 6.68593  | 7.73532  | 9.71721 |
| AAELO001895 | lactosylceramide 4-alpha-galactosyltransferase (alpha-1,4-galactosyltransferase)     | 0        | 0        | 0        | 0        | 43.6213  | 0        | 0        | 0       |
| AAELO001900 | lactosylceramide 4-alpha-galactosyltransferase (alpha-1,4-galactosyltransferase)     | 0        | 0        | 0.093512 | 0.054194 | 0.195515 | 0.272008 | 35.9491  | 11.1037 |
| AAELO000219 | lactoylglutathione lyase                                                             | 12.8254  | 12.0542  | 12.4892  | 12.0782  | 12.065   | 12.7936  | 150.68   | 79.8198 |
| AAELO000335 | lamin                                                                                | 150.529  | 139.084  | 180.232  | 161.613  | 84.5063  | 86.6263  | 1.62243  | 81.3561 |
| AAELO007803 | lamin b receptor                                                                     | 15.9185  | 15.1309  | 19.8459  | 20.103   | 7.48231  | 7.78286  | 2.85374  | 10.6709 |
| AAELO003658 | laminin beta-2 chain                                                                 | 37.844   | 37.8437  | 32.6081  | 24.9741  | 21.8308  | 22.4578  | 11.9871  | 18.0007 |
| AAELO10930  | l-asparaginase                                                                       | 1.43733  | 2.00919  | 2.40933  | 0.944674 | 1.6434   | 2.51602  | 448.077  | 202.921 |

|            |                                                                                     |          |          |          |          |          |          |          |          |
|------------|-------------------------------------------------------------------------------------|----------|----------|----------|----------|----------|----------|----------|----------|
| AAEL009932 | lethal giant larva, putative                                                        | 20.3559  | 20.0545  | 17.58    | 21.6083  | 28.8633  | 28.0533  | 117.795  | 54.4845  |
| AAEL013349 | lethal(2)essential for life protein, l2efl                                          | 0.642211 | 0.838433 | 0.709225 | 0.203246 | 6.46319  | 3.05464  | 33.3609  | 7.02029  |
| AAEL013341 | lethal(2)essential for life protein, l2efl                                          | 14.5119  | 13.7281  | 13.3442  | 12.4877  | 13.6032  | 13.5303  | 47.1204  | 17.5411  |
| AAEL013338 | lethal(2)essential for life protein, l2efl                                          | 2935.19  | 2623.24  | 9631.26  | 8440.01  | 326.508  | 369.467  | 41.0152  | 1054.51  |
| AAEL013346 | lethal(2)essential for life protein, l2efl                                          | 0.471355 | 0.931034 | 0.098453 | 0.517149 | 2.71075  | 1.81212  | 16.8676  | 4.7028   |
| AAEL006026 | leucine rich protein, putative                                                      | 7.87012  | 8.49432  | 10.5636  | 7.46233  | 12.2093  | 13.2572  | 1.95964  | 6.36896  |
| AAEL012092 | leucinech repeat                                                                    | 17.7348  | 16.2272  | 6.19334  | 4.31568  | 21.7405  | 17.7688  | 133.385  | 63.8928  |
| AAEL003720 | leucinech transmembrane protein                                                     | 54.7892  | 51.9678  | 38.312   | 37.8179  | 44.1212  | 44.1037  | 3675.6   | 1691.46  |
| AAEL003713 | leucinech transmembrane protein                                                     | 11.0282  | 11.8389  | 8.28326  | 9.53054  | 11.8712  | 11.5755  | 83.318   | 39.9165  |
| AAEL002615 | leucinech transmembrane protein                                                     | 1.60956  | 1.24601  | 2.2492   | 2.8472   | 10.6703  | 6.24407  | 124.948  | 47.4416  |
| AAEL003597 | leucinech transmembrane protein                                                     | 0.333844 | 0.305598 | 10.6153  | 3.3332   | 4.67008  | 3.94023  | 90.8998  | 39.0084  |
| AAEL012093 | leucinech transmembrane protein                                                     | 0.163146 | 0.02135  | 0.120864 | 0.135009 | 1.94307  | 0.73239  | 108.537  | 43.2198  |
| AAEL002295 | leucinech transmembrane protein                                                     | 2.63236  | 2.33436  | 1.93972  | 1.8481   | 7.52257  | 7.05402  | 782.402  | 273.232  |
| AAEL002978 | leucyl aminopeptidase, putative                                                     | 178.404  | 161.201  | 233.3    | 240.156  | 190.679  | 204.209  | 1206.96  | 616.961  |
| AAEL011058 | lim domain binding protein                                                          | 32.3014  | 36.3675  | 53.2734  | 44.1054  | 31.4304  | 36.4764  | 7.81909  | 18.8203  |
| AAEL013438 | LIM domain-binding protein 3, putative                                              | 4.63854  | 4.29118  | 8.4805   | 7.97567  | 2.87795  | 1.75751  | 74.4212  | 28.5463  |
| AAEL005667 | LIM domain-binding protein, putative                                                | 14.3844  | 13.4555  | 21.3623  | 20.8973  | 12.9223  | 8.40406  | 139.034  | 54.1755  |
| AAEL007055 | lipase                                                                              | 0.117894 | 0.277524 | 0.525746 | 0.100637 | 5.79304  | 1.60597  | 432.082  | 147.67   |
| AAEL011008 | lipase                                                                              | 1.60644  | 1.15786  | 4.99739  | 20.5999  | 0.63532  | 1.51821  | 0.110921 | 0.674663 |
| AAEL012350 | lipase 1 precursor                                                                  | 21.8829  | 12.58    | 33.9314  | 11.6856  | 41.8337  | 59.883   | 41.2332  | 47.1269  |
| AAEL014921 | lipase 1 precursor                                                                  | 0.25219  | 0.228429 | 0.140433 | 0.123095 | 0.182186 | 0.149322 | 629.387  | 193.958  |
| AAEL012340 | lipase 1 precursor                                                                  | 0        | 0        | 0        | 0        | 0        | 0        | 67.4409  | 13.315   |
| AAEL009309 | lipid depleted protein                                                              | 27.667   | 26.7378  | 32.3702  | 27.4994  | 36.1533  | 36.0104  | 4.78266  | 14.7428  |
| AAEL005951 | lipid storage droplets surface binding protein                                      | 183.505  | 159.772  | 113.995  | 116.048  | 315.946  | 294.323  | 5.83978  | 73.9631  |
| AAEL006820 | lipid storage droplets surface binding protein 2 (lsd2)                             | 775.59   | 722.011  | 753.56   | 605.718  | 520.78   | 522.812  | 387.589  | 595.822  |
| AAEL009766 | lipoamide acyltransferase component of branched-chain alpha-keto acid dehydrogenase | 23.2793  | 25.2227  | 8.80154  | 8.85262  | 25.0018  | 22.6505  | 6.06072  | 17.4409  |
| AAEL009957 | lipocalin-1 interacting membrane receptor (limr)                                    | 38.075   | 38.8136  | 47.6615  | 42.561   | 34.4623  | 32.4311  | 16.6149  | 23.3523  |
| AAEL007704 | lipoma preferred partner/lpp                                                        | 13.7652  | 13.3254  | 12.3089  | 11.4484  | 13.9741  | 12.7867  | 48.9165  | 21.9963  |
| AAEL008058 | liprin alpha (lar-interacting protein alpha) (synapse defective protein 2)          | 33.1536  | 32.1054  | 66.9474  | 59.4064  | 12.9707  | 15.625   | 14.0717  | 23.6779  |

|            |                                                                   |          |          |          |          |          |          |          |         |
|------------|-------------------------------------------------------------------|----------|----------|----------|----------|----------|----------|----------|---------|
| AAELO05149 | liprin-beta1, putative                                            | 15.6862  | 13.7167  | 12.5704  | 14.1849  | 19.6437  | 17.3584  | 68.6743  | 27.8918 |
| AAELO14706 | LL5 beta protein, putative                                        | 14.7932  | 14.2391  | 30.4796  | 26.9713  | 8.83921  | 9.23786  | 2.18296  | 7.88911 |
| AAELO12014 | l-lactate dehydrogenase                                           | 2.15642  | 11.308   | 21.2515  | 6.89874  | 2.85935  | 1.3279   | 897.377  | 175.615 |
| AAELO09232 | long-chain-fatty-acid coa ligase                                  | 3.93148  | 5.52626  | 2.47134  | 2.52389  | 2.44409  | 2.50297  | 211.995  | 114.215 |
| AAELO08687 | loqs                                                              | 34.4708  | 39.6666  | 72.5269  | 45.0513  | 39.7449  | 40.6161  | 41.5833  | 36.048  |
| AAELO03165 | low molecular weight protein-tyrosine-phosphatase                 | 46.4865  | 44.9787  | 64.3292  | 65.196   | 28.6652  | 31.7171  | 42.824   | 47.2607 |
| AAELO07657 | low-density lipoprotein receptor (ldl)                            | 7.68316  | 10.9595  | 5.66621  | 5.56677  | 9.22538  | 12.9055  | 0.200916 | 3.33289 |
| AAELO09869 | low-density lipoprotein receptor (ldl)                            | 3.98236  | 3.11438  | 18.533   | 8.41883  | 4.09613  | 3.032    | 0.721669 | 2.0952  |
| AAELO14222 | low-density lipoprotein receptor (ldl)                            | 110.127  | 113.332  | 45.4334  | 63.576   | 145.817  | 133.015  | 0.87243  | 50.8158 |
| AAELO08564 | low-density lipoprotein receptor (ldl)                            | 36.4738  | 37.6855  | 16.4485  | 25.1319  | 46.2583  | 49.6775  | 19.5492  | 31.9264 |
| AAELO12086 | LRIM1                                                             | 54.6044  | 53.4414  | 41.9107  | 34.5163  | 179.53   | 169.117  | 3.79405  | 18.006  |
| AAELO01401 | LRIM10A                                                           | 402.227  | 413.16   | 50.6314  | 48.4446  | 200.563  | 213.9    | 10.6294  | 169.749 |
| AAELO01402 | LRIM10B                                                           | 445.818  | 405.052  | 75.4226  | 51.2845  | 416.896  | 389.869  | 8.86778  | 133.833 |
| AAELO07103 | LRIM15                                                            | 23.8501  | 25.8797  | 29.3009  | 52.1484  | 42.7062  | 43.9663  | 1.08345  | 11.7685 |
| AAELO10125 | LRIM17                                                            | 85.3542  | 100.279  | 10.7327  | 15.7758  | 52.4653  | 45.9736  | 2.73799  | 21.2047 |
| AAELO12763 | LRIM24                                                            | 13.0912  | 13.1803  | 8.55752  | 9.91154  | 26.7454  | 23.5078  | 0.427928 | 4.85802 |
| AAELO10128 | LRIM4                                                             | 25.4566  | 36.9645  | 10.5547  | 6.43243  | 41.2486  | 36.1922  | 0.175555 | 7.8148  |
| AAELO01417 | LRIM7                                                             | 6.90047  | 7.94295  | 9.35754  | 9.21428  | 17.912   | 17.2779  | 0.149968 | 3.43228 |
| AAELO01420 | LRIM8                                                             | 447.426  | 542.204  | 91.6844  | 70.4811  | 666.955  | 657.446  | 9.99511  | 124.259 |
| AAELO01414 | LRIM9                                                             | 423.112  | 424.191  | 59.4114  | 47.3375  | 163.76   | 191.044  | 10.1816  | 102.907 |
| AAELO05241 | LST2                                                              | 17.4267  | 19.352   | 93.3137  | 37.7929  | 24.0892  | 21.7853  | 22.6266  | 17.7449 |
| AAELO03664 | lupus la ribonucleoprotein                                        | 83.7687  | 88.2619  | 101.197  | 77.0949  | 74.916   | 72.6278  | 16.7194  | 51.6686 |
| AAELO04134 | lupus la ribonucleoprotein                                        | 8.81079  | 11.3609  | 16.8425  | 10.1655  | 29.1363  | 18.0696  | 3.77065  | 13.3484 |
| AAELO10841 | lupus la ribonucleoprotein                                        | 44.9021  | 46.5954  | 24.0477  | 38.2488  | 38.7538  | 39.6775  | 9.62576  | 26.7431 |
| AAELO03723 | LYSC11                                                            | 14.4454  | 15.3887  | 11.1041  | 14.3521  | 61.7785  | 103.655  | 677.037  | 273.312 |
| AAELO09382 | lysine-specific demethylase NO66                                  | 23.6506  | 23.7175  | 24.3638  | 22.6105  | 31       | 33.526   | 2.43616  | 11.775  |
| AAELO04933 | lysosomal acid lipase, putative                                   | 0.045687 | 0.160881 | 0.067308 | 0.039146 | 0.081514 | 0.266782 | 645.099  | 319.908 |
| AAELO05752 | lysosomal alpha-mannosidase (mannosidase alpha class 2b member 1) | 168.347  | 173.924  | 61.9106  | 89.0171  | 14.1388  | 14.1399  | 862.643  | 744.892 |
| AAELO11357 | maintenance of killer 16 (mak16) protein                          | 26.6495  | 33.5674  | 41.5017  | 32.4374  | 54.4353  | 56.364   | 7.24413  | 18.4594 |
| AAELO10046 | maintenance of ploidy protein mob1 (mps1 binder 1)                | 45.4138  | 45.1933  | 41.8781  | 42.6468  | 34.242   | 37.2619  | 7.03772  | 22.9609 |
| AAELO08166 | malate dehydrogenase                                              | 148.069  | 165.597  | 183.507  | 156.999  | 157.287  | 149.625  | 215.398  | 176.939 |
| AAELO05790 | malic enzyme                                                      | 62.2745  | 44.8182  | 60.9718  | 82.2314  | 306.397  | 301.382  | 191.186  | 78.0268 |



|            |                                                                            |          |          |          |          |          |          |          |          |
|------------|----------------------------------------------------------------------------|----------|----------|----------|----------|----------|----------|----------|----------|
| AAEL002069 | malonyl coa-acyl carrier protein<br>transacylase                           | 13.9393  | 13.4566  | 12.0236  | 10.4703  | 16.5508  | 18.0012  | 4.71099  | 10.1184  |
| AAEL012554 | maltose phosphorylase                                                      | 0.585632 | 0.615581 | 0.029148 | 0.121207 | 3.07718  | 0.291093 | 46.7778  | 17.9774  |
| AAEL012555 | maltose phosphorylase                                                      | 6.2038   | 6.48983  | 0.937421 | 0.742757 | 0.697314 | 0.479763 | 0.269175 | 5.52473  |
| AAEL014537 | maltose phosphorylase                                                      | 1.9673   | 2.47293  | 0.26274  | 0.321484 | 0.831696 | 1.05786  | 148.082  | 30.8162  |
| AAEL010901 | mannose binding lectin, putative                                           | 62.3652  | 72.232   | 34.9352  | 34.8611  | 37.6635  | 37.8915  | 69.6257  | 71.8043  |
| AAEL011912 | mannose-1-phosphate guanyltransferase                                      | 22.8688  | 44.1963  | 11.093   | 10.8995  | 11.7345  | 13.1252  | 26.2441  | 25.704   |
| AAEL001331 | mannose-1-phosphate guanyltransferase                                      | 37.5194  | 74.8376  | 12.8958  | 13.3602  | 12.4082  | 14.0197  | 101.982  | 69.6759  |
| AAEL015438 | mannose-6-phosphate isomerase                                              | 33.3829  | 49.3697  | 15.9061  | 14.9042  | 14.3909  | 15.4261  | 20.0807  | 27.9989  |
| AAEL004389 | mannosidase alpha class 2a                                                 | 6.93666  | 7.54174  | 4.01312  | 3.9636   | 8.56533  | 7.84949  | 0.264026 | 3.6357   |
| AAEL001442 | map-kinase activating death domain protein<br>(madd)/denn/aex-3(c.elegans) | 20.6699  | 15.1431  | 23.0585  | 24.6494  | 14.8975  | 15.2466  | 0.584299 | 9.92408  |
| AAEL002655 | matrix metalloproteinase                                                   | 3.57769  | 1.33109  | 0.569203 | 0.704479 | 30.6538  | 5.68184  | 0.067279 | 0.399499 |
| AAEL005666 | matrix metalloproteinase                                                   | 6.2108   | 5.77433  | 9.72828  | 11.5324  | 4.67948  | 4.81698  | 153.901  | 58.0183  |
| AAEL002661 | matrix metalloproteinase                                                   | 0.778239 | 0.385641 | 0.342388 | 0.120465 | 13.0941  | 0.856118 | 54.4344  | 6.17347  |
| AAEL010797 | Med21                                                                      | 33.1104  | 32.9633  | 88.3265  | 75.0262  | 22.548   | 21.4868  | 15.6357  | 27.8719  |
| AAEL004195 | membrane associated progesterone receptor                                  | 42.3077  | 39.9489  | 64.9428  | 53.3917  | 70.8996  | 69.3534  | 207.084  | 115.448  |
| AAEL005699 | membrane protein tmsld                                                     | 37.7844  | 31.5206  | 30.123   | 32.1248  | 23.1976  | 23.5001  | 144.801  | 75.6954  |
| AAEL001279 | merozoite surface protein, putative                                        | 46.9443  | 46.0718  | 19.4212  | 25.2462  | 43.1815  | 40.995   | 37.234   | 14.2654  |
| AAEL014341 | metallocarboxypeptidase, putative                                          | 11.7912  | 11.6339  | 15.6671  | 14.365   | 14.5267  | 15.5305  | 2.07483  | 6.57564  |
| AAEL010073 | metalloendopeptidase                                                       | 18.1681  | 19.5642  | 26.603   | 25.1392  | 28.0764  | 27.4191  | 7.08311  | 16.1001  |
| AAEL011542 | metalloproteinase, putative                                                | 0        | 0        | 0        | 0        | 2.51546  | 12.3764  | 17.3306  | 29.5963  |
| AAEL013150 | methionine aminopeptidase                                                  | 10.3723  | 11.2579  | 15.3593  | 15.7499  | 19.3809  | 19.4509  | 2.84913  | 7.97723  |
| AAEL004738 | methionine aminopeptidase                                                  | 69.262   | 71.1821  | 76.8386  | 64.5504  | 89.934   | 85.7616  | 39.7667  | 45.8212  |
| AAEL010751 | methylenetetrahydrofolate dehydrogenase                                    | 111.595  | 89.3268  | 110.369  | 109.823  | 101.021  | 34.2451  | 28.4758  | 69.1867  |
| AAEL006085 | methylenetetrahydrofolate dehydrogenase                                    | 81.6184  | 125.598  | 22.1863  | 8.87554  | 44.0674  | 38.6961  | 29.2471  | 63.8098  |
| AAEL001134 | methylmalonate-semialdehyde dehydrogenase                                  | 77.9979  | 97.6857  | 48.4047  | 33.6924  | 84.9941  | 78.6223  | 26.5258  | 50.3773  |
| AAEL013967 | Methylmalonyl-CoA carboxyltransferase 12S<br>subunit, putative             | 17.6711  | 25.3885  | 14.2545  | 11.6163  | 38.8801  | 36.7415  | 6.25903  | 12.7993  |
| AAEL006435 | mevalonate kinase                                                          | 35.6647  | 32.7298  | 38.9462  | 33.5958  | 35.7427  | 36.492   | 11.5546  | 24.8602  |
| AAEL003192 | mfs transporter                                                            | 4.90772  | 4.0594   | 2.15254  | 2.23712  | 2.13991  | 1.53716  | 157.002  | 77.8248  |
| AAEL013141 | mfs transporter                                                            | 312.813  | 295.945  | 711.412  | 343.17   | 143.197  | 161.339  | 4.36     | 173.317  |
| AAEL012183 | mfs transporter                                                            | 162.983  | 162.936  | 358.538  | 185.978  | 78.7404  | 86.3603  | 2.69002  | 80.0847  |
| AAEL000800 | microsomal dipeptidase                                                     | 40.5207  | 39.8759  | 69.6101  | 81.0867  | 61.8812  | 66.2908  | 262.386  | 134.223  |
| AAEL006829 | microsomal glutathione s-transferase                                       | 101.544  | 146.376  | 102.618  | 101.454  | 92.9161  | 92.0677  | 897.3    | 449.951  |

|            |                                                                          |         |         |          |          |          |         |          |         |
|------------|--------------------------------------------------------------------------|---------|---------|----------|----------|----------|---------|----------|---------|
| AAEL010157 | microsomal glutathione s-transferase                                     | 0       | 0       | 0.291403 | 0.112523 | 0.615596 | 1.06878 | 206.324  | 87.0409 |
| AAEL000947 | microsomal signal peptidase 23 kd subunit (spc22/23)                     | 151.126 | 171.812 | 63.7859  | 54.918   | 58.9494  | 63.5027 | 180.57   | 165.119 |
| AAEL005712 | microtubule associated protein xmap215                                   | 68.7166 | 65.5093 | 81.5153  | 75.792   | 57.98    | 56.2771 | 12.2183  | 38.0118 |
| AAEL001605 | microtubule binding protein, putative                                    | 69.663  | 72.2519 | 109.708  | 90.2856  | 47.9127  | 48.483  | 39.498   | 58.1156 |
| AAEL013242 | microtubule binding protein, putative                                    | 8.23001 | 8.37948 | 24.7704  | 20.3913  | 11.9084  | 10.4995 | 2.66688  | 7.6976  |
| AAEL004176 | microtubule binding protein, putative                                    | 56.7481 | 57.2938 | 63.5732  | 58.2998  | 60.5766  | 55.2122 | 208.305  | 113.837 |
| AAEL002771 | microtubule binding protein, putative                                    | 33.3713 | 33.2023 | 23.5323  | 24.3864  | 31.7402  | 30.4146 | 9.7996   | 21.1776 |
| AAEL006911 | microtubule-associated protein                                           | 20.2525 | 18.7328 | 23.9697  | 22.12    | 24.0245  | 24.9839 | 94.3486  | 35.9672 |
| AAEL008657 | midline fasciclin                                                        | 164.16  | 151.347 | 95.283   | 159.253  | 106.539  | 103.972 | 12.8842  | 58.4458 |
| AAEL006752 | Misexpression suppressor of ras, putative                                | 37.8226 | 35.4283 | 46.525   | 36.4166  | 18.6253  | 19.3934 | 12.9081  | 26.6158 |
| AAEL009391 | Misexpression suppressor of ras, putative                                | 40.8836 | 42.6577 | 34.9773  | 29.805   | 29.1496  | 30.534  | 8.6015   | 30.0443 |
| AAEL000593 | mitochondrial 18 kda protein (mtp18)                                     | 17.2925 | 18.85   | 25.237   | 22.6402  | 13.6979  | 17.2902 | 3.1085   | 11.2866 |
| AAEL004067 | mitochondrial benzodiazepine receptor, putative                          | 19.4223 | 18.8919 | 15.3315  | 12.613   | 30.4784  | 21.3113 | 431.382  | 202.011 |
| AAEL007046 | mitochondrial brown fat uncoupling protein                               | 17.3247 | 11.8886 | 120.124  | 86.9085  | 14.5153  | 12.8689 | 0.436074 | 10.8449 |
| AAEL006262 | mitochondrial carrier protein                                            | 49.0336 | 41.92   | 68.0095  | 57.2211  | 45.2038  | 46.7257 | 27.4629  | 33.6797 |
| AAEL008494 | mitochondrial carrier protein ymc                                        | 173.445 | 198.544 | 26.578   | 35.765   | 122.812  | 95.5769 | 4.22694  | 97.9054 |
| AAEL010002 | mitochondrial import inner membrane translocase subunit timl7            | 41.3436 | 47.2454 | 37.7595  | 38.637   | 61.6388  | 58.2161 | 25.7226  | 38.1805 |
| AAEL007001 | mitochondrial import receptor subunit tom40                              | 48.9529 | 55.9556 | 58.9061  | 44.6055  | 105.352  | 102.589 | 37.4386  | 45.2173 |
| AAEL008128 | mitochondrial inner membrane protein translocase, 13kD-subunit, putative | 42.4363 | 42.6788 | 39.4939  | 23.9373  | 65.5395  | 63.3796 | 41.3062  | 33.3849 |
| AAEL002523 | mitochondrial inner membrane protein translocase, 9kD-subunit, putative  | 62.0828 | 57.1496 | 106.913  | 99.3077  | 53.5463  | 53.1912 | 43.4202  | 55.7681 |
| AAEL005693 | mitochondrial NADH:ubiquinone oxidoreductase B16.6 subunit, putative     | 12.0123 | 14.7033 | 15.8559  | 9.52526  | 25.9615  | 12.7299 | 43.4073  | 31.6566 |
| AAEL009100 | mitochondrial oxodicarboxylate carrier                                   | 21.3979 | 18.5773 | 8.97577  | 9.88154  | 8.45935  | 8.25558 | 94.8389  | 44.4532 |
| AAEL011195 | mitochondrial phosphate carrier protein                                  | 236.779 | 266.169 | 291.401  | 240.652  | 595.236  | 585.773 | 460.263  | 347.594 |
| AAEL013643 | mitochondrial transcription factor A, putative                           | 25.7966 | 25.9568 | 31.6482  | 28.5687  | 23.2856  | 25.805  | 10.2387  | 18.041  |
| AAEL011376 | mitosis inhibitor protein kinase                                         | 18.5484 | 19.798  | 28.2252  | 24.7234  | 14.0195  | 15.555  | 3.06327  | 10.8001 |
| AAEL006140 | mitosis inhibitor protein kinase                                         | 21.8486 | 23.2802 | 8.37875  | 14.0568  | 8.16304  | 8.50987 | 7.25172  | 14.3758 |

|            |                                                                       |         |          |          |          |          |          |          |          |
|------------|-----------------------------------------------------------------------|---------|----------|----------|----------|----------|----------|----------|----------|
| AAELO11596 | mitotic checkpoint serine/threonine-<br>protein kinase bub1 and bubr1 | 14.2186 | 11.9932  | 42.1267  | 36.0386  | 16.7848  | 18.0249  | 2.00447  | 7.91396  |
| AAELO08316 | mitotic spindle assembly checkpoint<br>protein mad2                   | 14.1799 | 12.102   | 42.2316  | 33.4376  | 6.55077  | 7.63568  | 1.40281  | 7.39865  |
| AAELO14329 | mixed lineage protein kinase                                          | 50.2924 | 48.0406  | 42.096   | 40.5442  | 42.2287  | 41.8053  | 25.4954  | 37.8696  |
| AAELO04120 | ML1                                                                   | 77.7553 | 106.332  | 17.5121  | 7.87103  | 75.7556  | 68.0478  | 3.891    | 34.7942  |
| AAELO06854 | ML13                                                                  | 35.4011 | 33.6966  | 33.8784  | 29.0609  | 27.639   | 27.0075  | 6.35291  | 16.8773  |
| AAELO09557 | ML17                                                                  | 0.59142 | 0.231877 | 746.298  | 311.119  | 0.52756  | 0.568301 | 0.884657 | 0.675291 |
| AAELO15138 | ML18                                                                  | 0       | 0        | 0        | 0        | 0        | 0        | 27.9542  | 6.77578  |
| AAELO09760 | ML21                                                                  | 1.82914 | 0.117391 | 3.92581  | 2.8758   | 8.87323  | 36.3369  | 852.833  | 441.688  |
| AAELO15136 | ML6                                                                   | 2.52322 | 2.0149   | 0.403741 | 0.378159 | 3.34672  | 6.96449  | 13474.1  | 5842.49  |
| AAELO04823 | MnSOD1                                                                | 79.1252 | 88.9277  | 76.7392  | 72.1745  | 110.886  | 110.737  | 55.5407  | 71.4777  |
| AAELO10576 | modifier of mdg4                                                      | 673.723 | 643.456  | 846.067  | 789.737  | 594.347  | 603.602  | 118.312  | 378.143  |
| AAELO07915 | moesin/ezrin/radixin                                                  | 43.3621 | 44.7754  | 71.6461  | 66.9475  | 50.0282  | 51.0961  | 115.318  | 59.5371  |
| AAELO11727 | Molybdenum cofactor sulfurase 2                                       | 0.09922 | 0.03334  | 48.254   | 3.15544  | 0.025904 | 0.028143 | 0.03162  | 0.094344 |
| AAELO14272 | molybdopterin cofactor sulfurase (mosc)                               | 7.43677 | 7.4591   | 5.2611   | 5.64594  | 5.86862  | 5.68844  | 135.567  | 46.5855  |
| AAELO07640 | molybdopterin synthase large subunit,<br>putative                     | 8.51838 | 14.3923  | 8.84364  | 18.3316  | 7.06448  | 6.3656   | 25.7396  | 6.97076  |
| AAELO00417 | monocarboxylate transporter                                           | 16.2562 | 14.0918  | 12.1953  | 12.2311  | 11.9181  | 13.5774  | 328.469  | 171.306  |
| AAELO03524 | monocarboxylate transporter                                           | 54.5564 | 38.1553  | 13.1502  | 14.3537  | 14.9778  | 14.48    | 402.451  | 198.175  |
| AAELO05513 | mothers against dpp protein                                           | 38.2453 | 35.3894  | 93.887   | 77.6869  | 24.0563  | 23.2723  | 16.1865  | 23.8426  |
| AAELO04813 | M-phase phosphoprotein, putative                                      | 21.887  | 24.384   | 25.4826  | 20.5991  | 41.8138  | 43.6397  | 12.0823  | 18.477   |
| AAELO11522 | MRAS2, putative                                                       | 12.3445 | 13.941   | 0.523472 | 5.34922  | 1.74551  | 1.43817  | 0.795656 | 8.60524  |
| AAELO12990 | mrg-binding protein                                                   | 6.79009 | 6.05242  | 5.64218  | 7.34571  | 5.49094  | 6.06159  | 3.69773  | 8.79927  |
| AAELO06887 | mrna turnover protein 4 mrt4                                          | 16.6837 | 21.0945  | 18.5327  | 13.9483  | 27.4605  | 23.0967  | 5.26574  | 10.6967  |
| AAELO09613 | mRpL36                                                                | 52.6107 | 51.1814  | 41.555   | 37.0696  | 44.7127  | 51.5217  | 26.615   | 42.5972  |
| AAELO06386 | mRpL39                                                                | 19.2684 | 21.2682  | 30.6511  | 23.7418  | 25.2085  | 25.8124  | 9.2388   | 15.6083  |
| AAELO06117 | mRpL7                                                                 | 55.8673 | 55.2342  | 60.317   | 45.7135  | 80.5228  | 88.164   | 39.3511  | 48.4981  |
| AAELO01280 | mRpS15                                                                | 2.3055  | 1.38817  | 4.10269  | 3.41509  | 2.36301  | 2.2254   | 1.37955  | 5.84357  |
| AAELO09608 | mRpS16                                                                | 41.2507 | 38.4189  | 38.7094  | 37.2302  | 42.8084  | 45.5289  | 23.4643  | 33.5717  |
| AAELO01615 | mRpS18C                                                               | 25.6956 | 23.1272  | 29.732   | 29.3471  | 31.7732  | 32.9408  | 7.71879  | 16.6413  |
| AAELO03801 | mRpS5                                                                 | 26.8169 | 27.0851  | 36.2346  | 33.7162  | 40.6825  | 41.0448  | 15.5588  | 21.8369  |
| AAELO12323 | MSF1 protein, putative                                                | 32.6867 | 33.783   | 37.4448  | 32.2413  | 38.2466  | 34.2164  | 17.5842  | 27.1573  |
| AAELO13880 | MSF1 protein, putative                                                | 70.3    | 60.7379  | 103.041  | 95.382   | 150.058  | 140.75   | 296.535  | 150.569  |
| AAELO01667 | multicopper oxidase                                                   | 6.73547 | 2.31247  | 0.817263 | 0.863511 | 7.31783  | 2.78242  | 3197.78  | 1188.25  |

|            |                                                          |          |          |          |          |          |          |          |         |
|------------|----------------------------------------------------------|----------|----------|----------|----------|----------|----------|----------|---------|
| AAELO07415 | multicopper oxidase                                      | 59.3306  | 37.0638  | 0.471837 | 0.586975 | 1.88135  | 2.06894  | 0.175381 | 23.5667 |
| AAELO07802 | multicopper oxidase                                      | 0.350366 | 0.209007 | 1.03561  | 0.612839 | 0.656561 | 0.678524 | 92.4796  | 29.8668 |
| AAELO06583 | multicopper oxidase                                      | 25.5326  | 16.127   | 0.180354 | 0.256961 | 0.375338 | 0.209553 | 0.329958 | 9.07502 |
| AAELO12189 | multidrug resistance protein 1 (atp-binding cassette C1) | 2.41994  | 3.85747  | 2.17967  | 1.80898  | 19.6673  | 4.28413  | 11.4115  | 8.65813 |
| AAELO11510 | multiple inositol polyphosphate phosphatase              | 0.067641 | 0        | 0.02517  | 0.116391 | 0.247298 | 0.235541 | 90.0928  | 32.8365 |
| AAELO03670 | myelinprotein expression factor                          | 100.017  | 105.234  | 57.9696  | 58.307   | 80.0677  | 80.8425  | 71.8993  | 78.8251 |
| AAELO08701 | myoinositol oxygenase                                    | 32.4512  | 27.9261  | 21.1047  | 26.6852  | 64.0021  | 51.7628  | 1.68913  | 8.7741  |
| AAELO01411 | myosin heavy chain, nonmuscle or smooth muscle           | 34.6135  | 33.0628  | 48.816   | 36.7187  | 29.4119  | 27.5098  | 140      | 64.7276 |
| AAELO11905 | myosin i                                                 | 8.94301  | 8.92057  | 6.92525  | 7.04144  | 20.167   | 19.941   | 726.719  | 333.661 |
| AAELO12631 | myosin i                                                 | 14.2888  | 11.0813  | 37.3439  | 26.3537  | 30.5996  | 27.5869  | 247.354  | 105.842 |
| AAELO09991 | myosin iii                                               | 1.57632  | 2.08815  | 1.65033  | 3.75465  | 3.53624  | 2.74271  | 93.9616  | 36.8663 |
| AAELO07632 | myosin light chain kinase                                | 8.2714   | 8.10254  | 17.1867  | 15.5924  | 6.28369  | 5.465    | 0.362303 | 4.00266 |
| AAELO08921 | myosin regulatory light chain 2 smooth muscle            | 77.8398  | 76.8026  | 93.6635  | 89.8891  | 63.1177  | 67.8593  | 340.762  | 176.517 |
| AAELO04227 | myosin vi                                                | 14.5882  | 14.6363  | 9.58427  | 10.4822  | 17.8728  | 16.011   | 407.856  | 159.256 |
| AAELO08610 | myosin vii                                               | 0.063758 | 0.033577 | 0.194391 | 0.056067 | 2.01605  | 1.31294  | 162.608  | 59.1962 |
| AAELO11436 | myosin xv                                                | 9.43632  | 8.08139  | 14.2202  | 14.5866  | 5.10882  | 5.49541  | 1.11797  | 5.60511 |
| AAELO13729 | myotonin-protein kinase                                  | 22.7599  | 21.885   | 37.0197  | 36.1639  | 20.1665  | 20.4348  | 7.49155  | 13.8751 |
| AAELO06022 | myotubularin                                             | 20.099   | 17.616   | 20.9203  | 19.5472  | 20.5456  | 20.5173  | 5.86     | 11.3868 |
| AAELO00053 | myotubularin                                             | 13.5835  | 11.745   | 26.4031  | 17.3862  | 11.7503  | 10.9624  | 0.712311 | 6.7391  |
| AAELO07672 | myst histone acetyltransferase                           | 18.6144  | 18.7139  | 30.8556  | 27.5791  | 23.3295  | 21.6191  | 5.25001  | 10.8799 |
| AAELO09406 | n(4)-(beta-n-acetylglucosaminyl)-l-asparaginase          | 26.8086  | 24.9351  | 10.4056  | 10.2864  | 23.7503  | 26.3574  | 340.906  | 169.2   |
| AAELO12062 | na+/k+ atpase alpha subunit                              | 103.293  | 96.049   | 140.396  | 122.507  | 134.137  | 130.56   | 505.057  | 239.451 |
| AAELO01146 | n-acetylgalactosaminyltransferase                        | 1.41108  | 0.818491 | 3.14085  | 35.5791  | 1.81827  | 1.14877  | 18.536   | 7.33589 |
| AAELO01151 | n-acetylgalactosaminyltransferase                        | 10.0185  | 9.28861  | 10.8087  | 44.1442  | 8.58194  | 8.30827  | 36.2789  | 17.663  |
| AAELO04538 | n-acetylgalactosaminyltransferase                        | 155.565  | 187.546  | 235.224  | 248.102  | 102.249  | 132.915  | 112.481  | 113.019 |
| AAELO12823 | n-acetylgalactosaminyltransferase                        | 4.10431  | 4.0628   | 4.29326  | 15.2096  | 4.40961  | 4.36727  | 5.43865  | 4.20637 |
| AAELO01122 | n-acetylgalactosaminyltransferase                        | 4.94731  | 2.14759  | 3.85217  | 5.33221  | 1.52847  | 1.07189  | 78.3879  | 32.6782 |
| AAELO01121 | n-acetylgalactosaminyltransferase                        | 6.53123  | 6.61588  | 6.67681  | 15.0674  | 8.18584  | 9.881    | 85.5043  | 41.578  |
| AAELO00654 | n-acetylgalactosaminyltransferase                        | 9.85266  | 10.913   | 9.99588  | 13.1847  | 11.6579  | 12.5447  | 199.865  | 90.8103 |
| AAELO00639 | n-acetylgalactosaminyltransferase                        | 1.91533  | 1.21002  | 2.37918  | 18.925   | 1.76037  | 2.09256  | 163.699  | 71.2229 |

|            |                                                                          |          |          |          |          |          |          |          |         |
|------------|--------------------------------------------------------------------------|----------|----------|----------|----------|----------|----------|----------|---------|
| AAELO13897 | n-acetylglucosaminyltransferase vi                                       | 35.5837  | 35.0852  | 46.1237  | 46.4375  | 21.8069  | 21.7632  | 12.373   | 22.1861 |
| AAELO11899 | N-acetyllactosaminide beta-1,3-N-acetylglucosaminyltransferase, putative | 0        | 0        | 0.017882 | 0.066305 | 1.46739  | 0.504429 | 31.5315  | 11.3379 |
| AAEL005709 | n-acetyltransferase separation anxiety                                   | 65.2596  | 70.3452  | 103.027  | 90.6533  | 71.7655  | 70.1628  | 26.5323  | 47.442  |
| AAELO11157 | NADH dehydrogenase, putative                                             | 65.3167  | 63.4268  | 65.6598  | 59.2272  | 87.3149  | 84.7989  | 100.717  | 101.167 |
| AAEL002825 | NADH:ubiquinone dehydrogenase, putative                                  | 75.3573  | 103.457  | 80.462   | 69.6905  | 117.269  | 114.08   | 247.225  | 154.873 |
| AAEL002881 | NADH:ubiquinone dehydrogenase, putative                                  | 328.462  | 373.628  | 284.511  | 240.353  | 410.504  | 399.483  | 788.903  | 499.267 |
| AAELO14673 | NADH:ubiquinone dehydrogenase, putative                                  | 5.18326  | 13.9949  | 9.4527   | 6.83909  | 6.80869  | 9.84524  | 7.19335  | 10.2373 |
| AAELO14689 | nadph cytochrome P450                                                    | 22.4661  | 19.8374  | 23.2794  | 23.8261  | 41.5929  | 30.9004  | 86.3314  | 37.5184 |
| AAEL003349 | nadph cytochrome P450                                                    | 26.6752  | 28.4157  | 31.5191  | 27.8098  | 53.8607  | 45.7782  | 120.141  | 58.0559 |
| AAEL000477 | nadph fad oxidoreductase                                                 | 15.8977  | 16.5252  | 20.7373  | 19.0077  | 12.6968  | 10.8347  | 6.52429  | 12.6904 |
| AAEL000746 | nadp-specific isocitrate dehydrogenase                                   | 112.626  | 127.956  | 110.554  | 105.183  | 59.6355  | 59.6059  | 668.813  | 406.465 |
| AAELO09651 | nascent polypeptide associated complex alpha subunit (nac alpha)         | 121.554  | 108.768  | 74.5136  | 53.9054  | 253.583  | 260.753  | 69.9436  | 89.1358 |
| AAELO11711 | nascent polypeptide associated complex alpha subunit (nac alpha)         | 74.8211  | 85.8163  | 69.073   | 45.5408  | 194.704  | 182.453  | 48.4519  | 66.5408 |
| AAEL009779 | NBP2b protein, putative                                                  | 19.6996  | 20.9925  | 21.7501  | 19.6422  | 22.1293  | 24.7628  | 14.4905  | 21.3799 |
| AAEL009579 | NBP2b protein, putative                                                  | 12.1315  | 12.7841  | 17.4417  | 14.8462  | 12.4256  | 10.4749  | 3.38464  | 8.70739 |
| AAEL007289 | NBP2b protein, putative                                                  | 41.7435  | 40.7033  | 56.1722  | 51.3966  | 54.1207  | 51.4677  | 13.0308  | 29.8407 |
| AAEL002375 | NBP2b protein, putative                                                  | 36.3281  | 36.9216  | 53.5451  | 42.4116  | 61.5492  | 60.3647  | 21.4643  | 29.0296 |
| AAELO10803 | ncd                                                                      | 12.7184  | 13.4008  | 38.2143  | 33.9353  | 11.6382  | 11.9202  | 2.63813  | 7.93199 |
| AAEL000558 | neural stem cell-derived dendrite regulator                              | 9.74997  | 9.44835  | 14.554   | 12.5694  | 7.89373  | 6.96348  | 0.594691 | 5.14577 |
| AAELO11396 | neurogenic locus delta protein                                           | 22.9419  | 21.9921  | 39.13    | 40.1063  | 14.3229  | 14.4968  | 3.33757  | 11.0671 |
| AAELO13689 | neuronal calcium sensor, putative                                        | 5.97119  | 5.40212  | 8.63153  | 6.62211  | 6.45322  | 7.0557   | 66.8603  | 27.6043 |
| AAEL003469 | NHP2 protein, putative                                                   | 49.4765  | 55.7536  | 78.1666  | 68.6232  | 68.7688  | 77.7243  | 17.5286  | 34.6357 |
| AAEL004923 | nicotinic acetylcholine receptor, putative                               | 5.4638   | 7.52894  | 2.94393  | 2.63111  | 7.41234  | 5.44561  | 0.139585 | 3.21239 |
| AAEL007226 | nidogen                                                                  | 35.4868  | 44.8555  | 0.612889 | 0.408934 | 1.60944  | 1.35526  | 1.10868  | 16.1536 |
| AAEL009531 | niemann-pick C1                                                          | 0.041389 | 0.177109 | 0.040206 | 0.069821 | 0.959611 | 1.23633  | 360.97   | 146.528 |
| AAELO14038 | NIF3-like protein 1, putative                                            | 15.1471  | 17.7823  | 14.3751  | 15.43    | 13.4458  | 13.843   | 9.3139   | 15.2474 |
| AAEL000206 | ninjurin A, putative                                                     | 0.117898 | 0.269132 | 0.262276 | 0.302672 | 2.56627  | 1.74941  | 391.588  | 168.926 |
| AAELO12261 | nitrate, fromate, iron dehydrogenase                                     | 18.3557  | 17.3071  | 17.3231  | 16.7477  | 21.7212  | 23.3976  | 93.4098  | 48.5586 |
| AAEL000111 | nitrilase, putative                                                      | 49.8627  | 62.3356  | 69.0704  | 65.9349  | 36.2655  | 37.734   | 1.3289   | 27.8569 |
| AAEL004071 | nitrogen fixation protein nifu                                           | 59.3959  | 59.8197  | 91.4835  | 83.8346  | 92.144   | 78.3664  | 211.83   | 117.785 |
| AAELO11272 | nmda receptor glutamate-binding chain                                    | 52.8189  | 52.5874  | 51.1235  | 54.5046  | 42.8372  | 43.405   | 346.946  | 169.031 |

|            |                                                   |          |          |          |         |          |          |          |          |
|------------|---------------------------------------------------|----------|----------|----------|---------|----------|----------|----------|----------|
| AAEL004307 | n-myc downstream regulated                        | 48.0031  | 50.7247  | 49.6123  | 37.6885 | 51.2409  | 48.3838  | 129.923  | 67.5096  |
| AAEL007158 | nnp-1 protein (novel nuclear protein 1) (nop52)   | 29.4902  | 30.3506  | 31.3597  | 26.8034 | 47.6385  | 47.3356  | 6.42468  | 17.9268  |
| AAEL003039 | nonsense-mediated mrna decay protein              | 71.313   | 74.4176  | 55.2851  | 49.1156 | 301.052  | 329.127  | 55.826   | 63.9036  |
| AAEL014051 | nop14                                             | 57.8417  | 55.0664  | 74.6972  | 60.8989 | 62.3109  | 63.6867  | 3.20262  | 31.6726  |
| AAEL012107 | NOS                                               | 55.3667  | 53.7436  | 63.3981  | 70.3875 | 34.3938  | 40.5056  | 0.832016 | 22.6339  |
| AAEL002039 | NADPH oxidase (NOX5)                              | 2.04523  | 2.14717  | 1.14439  | 1.26172 | 1.41199  | 0.81588  | 0.327787 | 2.24347  |
| AAEL002733 | npf                                               | 0        | 0.675118 | 0.418555 | 2.08795 | 1.61466  | 2.9626   | 721.949  | 311.782  |
| AAEL006743 | n-terminal acetyltransferase complex ardl subunit | 102.097  | 98.8779  | 117.718  | 108.684 | 112.25   | 109.27   | 80.0647  | 83.3806  |
| AAEL003908 | nuclear pore complex protein nup107               | 29.1566  | 29.2331  | 28.6992  | 34.828  | 18.534   | 20.8224  | 5.34379  | 17.4601  |
| AAEL001861 | nuclear pore complex protein nup154               | 33.3379  | 32.3584  | 40.088   | 31.482  | 32.0741  | 33.0139  | 6.16059  | 17.5727  |
| AAEL004368 | nucleolar RNA-associated protein                  | 20.9339  | 20.7558  | 11.2703  | 15.1469 | 25.7252  | 26.1161  | 3.93443  | 11.1426  |
| AAEL006710 | nucleolysin tia-1                                 | 49.705   | 49.0144  | 42.2553  | 47.0202 | 43.4313  | 41.8973  | 6.03278  | 26.4469  |
| AAEL005635 | nucleoporin                                       | 37.0153  | 40.9592  | 36.2937  | 34.0754 | 41.3174  | 42.7049  | 12.8102  | 26.7123  |
| AAEL002455 | nucleoporin, Nup153, putative                     | 37.9515  | 40.6332  | 49.3234  | 44.5563 | 39.1548  | 41.9237  | 12.1509  | 24.5658  |
| AAEL006311 | nucleoporin, putative                             | 25.8083  | 25.2348  | 26.6246  | 24.339  | 22.4825  | 25.3148  | 14.1028  | 21.5424  |
| AAEL012359 | nucleoside-diphosphate kinase NBR-A, putative     | 1138.54  | 1281.13  | 1176.32  | 1019.57 | 1243.27  | 1366.9   | 774.149  | 919.535  |
| AAEL005567 | nucleosome assembly protein                       | 19.232   | 22.4465  | 32.5055  | 20.2257 | 144.013  | 149.842  | 54.7188  | 35.9371  |
| AAEL008143 | nucleotide binding protein 2 (nbp 2)              | 12.9125  | 12.2925  | 6.95542  | 7.10861 | 11.1123  | 15.395   | 46.7643  | 20.2116  |
| AAEL010360 | nucleotide binding protein 2 (nbp 2)              | 4.78704  | 5.49271  | 3.31816  | 3.25353 | 7.22863  | 6.84306  | 39.5939  | 13.7575  |
| AAEL009305 | numb-associated kinase                            | 11.1119  | 6.84039  | 16.7036  | 93.3576 | 13.4181  | 12.4012  | 39.5619  | 16.8014  |
| AAEL002587 | OBP11                                             | 67.4634  | 89.6221  | 35.6489  | 28.7266 | 68.084   | 68.7546  | 0.531701 | 13.9893  |
| AAEL003315 | OBP16                                             | 0.126386 | 0        | 4.73677  | 251.348 | 0        | 0        | 0.282208 | 0        |
| AAEL004342 | OBP18                                             | 62.4827  | 55.7448  | 6.80429  | 1.53996 | 34.1525  | 28.0992  | 1.0586   | 61.4537  |
| AAEL005772 | OBP22                                             | 929.738  | 851.179  | 2.88632  | 2.53915 | 13.7589  | 13.8333  | 28.5007  | 410.165  |
| AAEL006393 | OBP28                                             | 6.02268  | 4.68457  | 1370.45  | 8195.96 | 3.54569  | 3.99973  | 3.44732  | 4.15763  |
| AAEL006387 | OBP29                                             | 0        | 0.06833  | 4.32349  | 207.365 | 0.260635 | 0.113467 | 0.269031 | 0.100719 |
| AAEL006396 | OBP31                                             | 1.22378  | 1.0762   | 801.636  | 6180.29 | 1.03255  | 0.839342 | 1.11391  | 1.23735  |
| AAEL006398 | OBP32                                             | 0.465222 | 0.066982 | 208.635  | 1363.01 | 0.051792 | 0.226145 | 0.134911 | 0.203044 |
| AAEL006385 | OBP33                                             | 1.24619  | 0.677214 | 451.59   | 3755.38 | 0.525891 | 0.229338 | 0.548998 | 0.827667 |
| AAEL009597 | OBP40                                             | 0        | 0.085936 | 5.57775  | 91.8412 | 0.135692 | 0        | 0        | 0        |
| AAEL009599 | OBP41                                             | 0.819555 | 0.59375  | 623.98   | 3069.44 | 0.159819 | 0.818863 | 0.994055 | 1.39372  |
| AAEL010718 | OBP44                                             | 0        | 0        | 97.8061  | 264.077 | 0.19862  | 0.107922 | 0        | 0        |

|            |                                                                                                                            |          |          |          |          |          |          |          |          |
|------------|----------------------------------------------------------------------------------------------------------------------------|----------|----------|----------|----------|----------|----------|----------|----------|
| AAELO10714 | OBP45                                                                                                                      | 0.35321  | 0.101166 | 512.997  | 1257.62  | 0.160078 | 0.174161 | 0.796733 | 0.747317 |
| AAELO10872 | OBP46                                                                                                                      | 1.41833  | 1.06446  | 741.51   | 7483.99  | 0.874944 | 1.16696  | 2.56034  | 0.958491 |
| AAELO11491 | OBP52                                                                                                                      | 0.960615 | 0.831825 | 3.06592  | 151.756  | 1.0775   | 1.63617  | 0        | 0.598592 |
| AAELO00821 | OBP6                                                                                                                       | 0        | 0        | 0.058506 | 12.0017  | 0        | 0        | 0        | 0        |
| AAELO00833 | OBP7                                                                                                                       | 0.260088 | 0.119742 | 39.4241  | 247.858  | 0        | 0        | 0        | 0        |
| AAELO04783 | Oda                                                                                                                        | 406.507  | 383.413  | 639.508  | 576.038  | 205.12   | 221.475  | 1187.16  | 681.395  |
| AAELO07450 | odd skipped, putative                                                                                                      | 1.86167  | 1.95169  | 0.870364 | 0.921731 | 2.07685  | 1.48206  | 31.3097  | 9.68656  |
| AAELO02626 | Odorant-binding protein 56e, putative                                                                                      | 1.66292  | 0.880666 | 502.32   | 2403.41  | 5.81298  | 6.15902  | 2.06198  | 1.02787  |
| AAELO00839 | O-fucosyltransferase, putative                                                                                             | 31.1453  | 27.1668  | 35.0005  | 27.4662  | 19.8199  | 21.1768  | 6.5133   | 16.0215  |
| AAELO03318 | oligopeptide transporter                                                                                                   | 0.70568  | 0.755406 | 0.293984 | 0.384334 | 1.54801  | 1.95767  | 2852.03  | 1219.17  |
| AAELO08381 | oligopeptide transporter                                                                                                   | 62.1016  | 64.1908  | 15.7961  | 67.1546  | 32.4159  | 31.2004  | 1.18616  | 34.2956  |
| AAELO08865 | oligoribonuclease, mitochondrial                                                                                           | 16.183   | 18.446   | 18.4121  | 16.4691  | 6.30384  | 8.94108  | 5.958    | 15.0884  |
| AAELO04228 | oligosaccharyl transferase                                                                                                 | 72.4394  | 76.0117  | 57.3452  | 52.8951  | 48.5444  | 48.9672  | 46.6986  | 57.5042  |
| AAELO02804 | oligosaccharyl transferase                                                                                                 | 61.589   | 85.8448  | 19.6967  | 18.9325  | 31.7474  | 32.3262  | 59.4612  | 57.2296  |
| AAELO02183 | oligosaccharyl transferase, subunit, putative                                                                              | 196.413  | 260.057  | 73.1311  | 64.9464  | 108.691  | 116.854  | 287.173  | 248.651  |
| AAELO12141 | Or43                                                                                                                       | 9.41111  | 9.6182   | 12.022   | 12.6318  | 8.63188  | 9.63534  | 0.175176 | 3.15411  |
| AAELO10339 | orf 140; significant similarity to ORF next to beta-keto adipate succinyl CoA transferase from <i>P. putida</i> , putative | 20.0189  | 19.9691  | 24.346   | 21.3524  | 21.66    | 21.499   | 14.5704  | 21.538   |
| AAELO07693 | organic anion transporter                                                                                                  | 1.26012  | 1.46476  | 2.4219   | 1.08904  | 2.43894  | 1.45028  | 78.1013  | 28.3973  |
| AAELO07691 | organic anion transporter                                                                                                  | 4.1844   | 4.66807  | 17.454   | 6.55258  | 7.64746  | 5.83083  | 150.855  | 62.6859  |
| AAELO01808 | organic anion transporter                                                                                                  | 33.1204  | 29.4126  | 35.2066  | 30.5167  | 12.1702  | 13.2593  | 4.20374  | 11.2282  |
| AAELO12444 | organic cation transporter                                                                                                 | 19.5238  | 16.4812  | 20.1309  | 16.9013  | 19.4541  | 21.0945  | 219.252  | 111.391  |
| AAELO04328 | origin recognition complex subunit                                                                                         | 22.4915  | 24.9391  | 36.9877  | 35.0029  | 16.656   | 15.3297  | 1.6175   | 12.9943  |
| AAELO10080 | origin recognition complex subunit                                                                                         | 31.8398  | 29.9466  | 67.9393  | 55.3259  | 23.7751  | 24.068   | 1.83126  | 15.2029  |
| AAELO11358 | origin recognition complex subunit                                                                                         | 11.679   | 11.5852  | 12.7099  | 15.9483  | 7.38581  | 8.28622  | 0.784894 | 7.02755  |
| AAELO05289 | ornithine aminotransferase                                                                                                 | 48.2796  | 51.8851  | 66.971   | 54.8949  | 61.6898  | 55.2329  | 551.974  | 231.857  |
| AAELO07878 | ornithine decarboxylase                                                                                                    | 11.3725  | 12.7091  | 1.58096  | 1.48014  | 5.14313  | 4.45939  | 0.530119 | 5.09653  |
| AAELO00044 | ornithine decarboxylase                                                                                                    | 2.23024  | 3.95745  | 35.4802  | 38.9154  | 9.85664  | 11.3003  | 245.991  | 95.8519  |
| AAELO07880 | ornithine decarboxylase                                                                                                    | 232.883  | 180.268  | 125.778  | 114.687  | 245.306  | 330.626  | 3011.48  | 986.562  |
| AAELO11309 | orotidine-5'-phosphate decarboxylase, putative                                                                             | 55.2906  | 59.4353  | 68.4759  | 51.4409  | 169.822  | 161.325  | 37.1163  | 47.2609  |
| AAELO04571 | o-sialoglycoprotein endopeptidase                                                                                          | 11.704   | 11.6691  | 15.1848  | 13.4944  | 15.7016  | 18.9487  | 1.24715  | 6.41155  |
| AAELO00442 | osk                                                                                                                        | 698.809  | 780.898  | 979.768  | 882.422  | 301.426  | 324.736  | 10.094   | 405.088  |

|            |                                                                |          |          |          |          |          |          |         |         |
|------------|----------------------------------------------------------------|----------|----------|----------|----------|----------|----------|---------|---------|
| AAEL002076 | outer mitochondrial translocase subunit, putative              | 24.4716  | 28.292   | 32.3705  | 25.2477  | 43.2555  | 44.1149  | 64.4136 | 75.3775 |
| AAEL007669 | oxidoreductase                                                 | 0.130537 | 0        | 0.283089 | 0.164187 | 0.301967 | 0.330068 | 83.3565 | 31.6761 |
| AAEL010677 | oxidoreductase                                                 | 27.9582  | 23.8878  | 45.8384  | 44.8466  | 20.0335  | 24.0254  | 4.42361 | 14.1739 |
| AAEL005852 | oxysterol-binding protein 1, putative                          | 57.0882  | 58.3203  | 55.6979  | 58.4477  | 41.2826  | 41.1801  | 303.177 | 162.502 |
| AAEL001706 | p15-2a protein, putative                                       | 79.5879  | 75.9436  | 99.7077  | 75.7158  | 74.1714  | 73.2227  | 32.4074 | 51.4528 |
| AAEL008736 | p31A, putative                                                 | 112.661  | 114.83   | 145.819  | 131.468  | 107.727  | 112.108  | 53.7467 | 83.5012 |
| AAEL001235 | palmitoyl-protein thioesterase                                 | 8.72066  | 7.10397  | 13.1819  | 18.8856  | 7.19889  | 6.29533  | 75.5315 | 27.693  |
| AAEL007151 | paramyosin, putative                                           | 42.8784  | 39.7808  | 73.4614  | 49.0899  | 41.6272  | 38.6694  | 146.105 | 90.1475 |
| AAEL000692 | partner of sld5                                                | 25.7561  | 29.4415  | 34.2906  | 32.5697  | 16.0273  | 15.0933  | 6.94445 | 17.7293 |
| AAEL010403 | past-1                                                         | 43.7499  | 46.4722  | 42.232   | 34.0315  | 52.4478  | 50.5779  | 189.246 | 77.9012 |
| AAEL000339 | paxillin, putative                                             | 23.7985  | 23.9203  | 35.2895  | 35.2758  | 31.423   | 30.5564  | 117.229 | 58.6528 |
| AAEL003928 | pdgf/vegf receptor                                             | 8.22012  | 7.37422  | 3.93364  | 3.52491  | 12.1221  | 10.0414  | 64.7043 | 27.3894 |
| AAEL012280 | pef protein with a long n-terminal hydrophobic domain (peflin) | 24.6068  | 25.3633  | 27.611   | 23.0489  | 19.1006  | 17.8609  | 125.395 | 50.7983 |
| AAEL013279 | peptidyl-prolyl cis-trans isomerase (cyclophilin)              | 498.676  | 550.973  | 324.076  | 288.477  | 142.374  | 158.244  | 1032.61 | 743.342 |
| AAEL011758 | peptidyl-prolyl cis-trans isomerase f, ppif                    | 721.669  | 765.706  | 756.384  | 654.111  | 740.34   | 767.404  | 782.296 | 696.705 |
| AAEL006066 | peptidyl-trna hydrolase                                        | 46.0471  | 53.4371  | 62.3357  | 50.3906  | 55.1591  | 56.9655  | 14.2334 | 28.3773 |
| AAEL004861 | peroxisomal integral membrane protein Per8p, putative          | 12.255   | 12.3124  | 18.8692  | 19.4152  | 17.2782  | 12.6199  | 0       | 7.58663 |
| AAEL002913 | peroxisomal membrane protein 70 abcd3                          | 19.327   | 20.2346  | 19.6127  | 31.7091  | 23.7189  | 22.3027  | 178.933 | 88.2354 |
| AAEL006491 | peroxisomal targeting signal 2 receptor                        | 27.9945  | 29.9387  | 27.4913  | 29.5888  | 35.4566  | 40.5992  | 12.8745 | 21.7527 |
| AAEL000081 | peroxisome assembly factor-2 (peroxisomal-type atpase 1)       | 51.0941  | 50.3831  | 71.9004  | 51.5547  | 77.5639  | 77.4478  | 28.1728 | 36.8915 |
| AAEL010171 | PGRPLB                                                         | 0.555355 | 0.318166 | 1.12966  | 0.848477 | 3.58619  | 4.24024  | 472.865 | 100.586 |
| AAEL011608 | PGRPLD                                                         | 39.4244  | 40.2241  | 74.3706  | 62.9444  | 37.9599  | 47.0603  | 5.57977 | 25.3584 |
| AAEL009474 | PGRPS1                                                         | 17.5785  | 23.1403  | 7.24944  | 8.2743   | 35.5475  | 69.8153  | 1481.35 | 527.785 |
| AAEL003032 | phd finger protein                                             | 28.1337  | 25.5773  | 34.9764  | 33.4842  | 22.4437  | 24.9415  | 9.80854 | 17.8295 |
| AAEL011124 | phd finger protein                                             | 21.9575  | 21.5662  | 31.6689  | 30.934   | 17.1089  | 17.5943  | 1.88371 | 14.8424 |
| AAEL002867 | phenylalanyl-tRNA synthetase alpha chain                       | 47.997   | 54.7602  | 30.5198  | 28.7102  | 59.2683  | 57.7293  | 23.8403 | 29.7611 |
| AAEL003454 | Phocein protein, putative                                      | 30.9076  | 29.2672  | 45.271   | 28.3414  | 20.5558  | 22.0891  | 35.0971 | 29.3954 |
| AAEL000264 | phospholipase d                                                | 8.61057  | 8.78867  | 16.1025  | 11.5041  | 15.2009  | 14.6705  | 100.364 | 44.6685 |
| AAEL007019 | phosphate transporter                                          | 153.78   | 159.424  | 125.137  | 119.008  | 186.454  | 183.531  | 109.219 | 114.855 |



|            |                                                                                   |          |          |          |          |          |          |          |          |
|------------|-----------------------------------------------------------------------------------|----------|----------|----------|----------|----------|----------|----------|----------|
| AAEL007322 | phosphatidate phosphatase                                                         | 15.738   | 16.802   | 10.7789  | 20.8094  | 22.5365  | 16.5093  | 86.4744  | 42.8671  |
| AAEL013170 | phosphatidylcholine-sterol acyltransferase (lecithin-cholesterol acyltransferase) | 103.285  | 109.378  | 30.7319  | 43.1158  | 40.7129  | 42.5961  | 19.5888  | 57.1026  |
| AAEL011264 | phosphatidylethanolamine-binding protein                                          | 16.7352  | 12.4827  | 12.3689  | 12.2506  | 10.3502  | 11.1986  | 375.573  | 173.872  |
| AAEL011260 | phosphatidylethanolamine-binding protein                                          | 0.179815 | 0.210601 | 152.984  | 75.3935  | 0.488774 | 0.442822 | 0.490237 | 0.374319 |
| AAEL015262 | phosphatidylethanolamine-binding protein, putative                                | 0.890608 | 1.01677  | 533.19   | 289.593  | 1.13945  | 0.857679 | 2.24873  | 1.01561  |
| AAEL015260 | phosphatidylethanolamine-binding protein, putative                                | 4.56871  | 3.47358  | 4.63373  | 5.01656  | 2.2424   | 3.19356  | 129.582  | 36.2567  |
| AAEL013596 | phosphatidylinositol 3-kinase regulatory subunit                                  | 31.9831  | 31.4804  | 11.4634  | 16.0795  | 28.0098  | 30.2388  | 10.8193  | 17.7555  |
| AAEL013863 | phosphatidylinositol-binding clathrin assembly protein                            | 58.4137  | 62.006   | 54.9168  | 56.244   | 53.1997  | 49.5447  | 33.8618  | 43.5877  |
| AAEL008393 | phosphatidylserine synthase                                                       | 24.051   | 18.8508  | 20.3682  | 38.0508  | 23.2136  | 23.1198  | 26.6229  | 20.3869  |
| AAEL001472 | phosphatidyltransferase                                                           | 18.3287  | 19.2064  | 17.1854  | 19.435   | 15.2001  | 15.1335  | 2.55966  | 10.0417  |
| AAEL006667 | phosphatidyltransferase                                                           | 21.0006  | 19.3962  | 4.70589  | 6.31474  | 19.9817  | 22.2305  | 83.5226  | 40.7016  |
| AAEL000006 | phosphoenolpyruvate carboxykinase                                                 | 119.651  | 150.39   | 95.9946  | 67.3562  | 20.3706  | 23.4375  | 27.7679  | 148.308  |
| AAEL000080 | phosphoenolpyruvate carboxykinase                                                 | 109.305  | 142.351  | 53.6267  | 46.8836  | 12.6575  | 20.3965  | 1286.37  | 562.732  |
| AAEL001480 | phosphoglucomutase                                                                | 54.3254  | 54.6554  | 5.02677  | 8.10727  | 21.3773  | 22.7065  | 24.6693  | 35.1029  |
| AAEL010369 | phospholipase b, plbl                                                             | 0.4285   | 0.551029 | 11.9852  | 33.6603  | 0.152883 | 0.273383 | 4.91036  | 3.30449  |
| AAEL010661 | phospholipid scramblase 1, putative                                               | 24.7504  | 29.3189  | 31.1921  | 32.6541  | 48.6376  | 46.2439  | 217.036  | 95.899   |
| AAEL007677 | phospholysine phosphohistidine inorganic pyrophosphate phosphatase                | 8.72001  | 9.05537  | 9.20558  | 8.62096  | 11.0534  | 10.3843  | 2.64778  | 10.4529  |
| AAEL009497 | phosphomannomutase                                                                | 20.6136  | 35.6036  | 18.8905  | 15.5823  | 8.00095  | 9.45118  | 30.4432  | 24.0843  |
| AAEL005384 | phosphoribosylformylglycinamide synthase, putative                                | 39.5544  | 68.0387  | 22.1541  | 17.7982  | 40.1496  | 36.3107  | 43.4337  | 40.7494  |
| AAEL001100 | phosphoserine phosphatase                                                         | 111.462  | 105.63   | 14.3454  | 9.59931  | 15.35    | 15.3783  | 2130.75  | 1220.34  |
| AAEL010326 | Phosphotriesterase-related protein                                                | 0.517238 | 0.174596 | 0.895983 | 0.715569 | 0.504877 | 0.690628 | 18.6846  | 4.52497  |
| AAEL002415 | pinch                                                                             | 16.2592  | 17.6764  | 20.3537  | 37.5831  | 16.9194  | 15.5214  | 35.8973  | 20.0153  |
| AAEL007823 | PIWI                                                                              | 54.4756  | 53.1369  | 45.8779  | 54.1393  | 68.481   | 67.3946  | 18.0078  | 32.9797  |
| AAEL008076 | PIWI1                                                                             | 16.8913  | 22.0863  | 5.43526  | 7.20044  | 29.4142  | 24.706   | 0.389168 | 7.8615   |
| AAEL008098 | PIWI2                                                                             | 11.5765  | 10.9183  | 10.2594  | 10.5799  | 25.8082  | 28.6992  | 0.117931 | 6.20421  |
| AAEL013692 | PIWI3                                                                             | 18.359   | 21.7979  | 4.30335  | 7.79984  | 23.2575  | 19.2209  | 0.118669 | 10.7216  |
| AAEL007698 | PIWI4                                                                             | 42.8019  | 36.6511  | 85.1713  | 71.7498  | 34.9862  | 34.008   | 14.8203  | 25.1894  |
| AAEL013227 | PIWI6                                                                             | 61.3582  | 57.0362  | 44.768   | 39.2823  | 49.2551  | 47.5314  | 20.503   | 40.9563  |

|            |                                                              |          |          |          |          |          |          |          |         |
|------------|--------------------------------------------------------------|----------|----------|----------|----------|----------|----------|----------|---------|
| AAELO11662 | plasma glutamate carboxypeptidase                            | 0        | 0        | 0.123948 | 0        | 0        | 0.033054 | 198.407  | 109.652 |
| AAELO11658 | plasma glutamate carboxypeptidase                            | 42.7304  | 44.9761  | 77.008   | 67.7125  | 42.3604  | 40.9572  | 17.2441  | 28.8269 |
| AAELO11815 | poly [adpbose] polymerase                                    | 25.1127  | 26.3374  | 23.0222  | 25.7179  | 28.0328  | 26.7359  | 12.157   | 19.3227 |
| AAELO06249 | poly(a) polymerase cid (pap) (caffein-induced death protein) | 101.061  | 100.301  | 154.839  | 131.649  | 72.5627  | 70.9229  | 10.9556  | 49.7925 |
| AAELO02550 | polyA-binding protein interacting protein, putative          | 56.8396  | 56.3388  | 100.41   | 91.7077  | 41.6816  | 40.6807  | 33.5301  | 44.4558 |
| AAELO10318 | polyadenylate-binding protein                                | 659.54   | 745.005  | 527.111  | 512.165  | 857.436  | 965.01   | 803.417  | 715.7   |
| AAELO14098 | polycomb protein                                             | 23.3322  | 22.9897  | 25.2988  | 28.1039  | 15.7731  | 17.1974  | 6.99673  | 14.8542 |
| AAELO12568 | polypeptide of 976 aa, putative                              | 29.8109  | 29.5844  | 35.5804  | 36.4859  | 48.1169  | 44.6757  | 5.61195  | 18.591  |
| AAELO04686 | pont                                                         | 21.8222  | 22.3133  | 31.4841  | 29.8842  | 20.3488  | 19.1164  | 8.67331  | 16.7315 |
| AAELO04814 | potassium-dependent sodium-calcium exchanger, putative       | 0.493794 | 0.286952 | 0.474563 | 0.355744 | 0.247295 | 0.320988 | 84.2317  | 34.6409 |
| AAELO04821 | potassium-dependent sodium-calcium exchanger, putative       | 18.9315  | 20.0257  | 14.3067  | 18.865   | 26.787   | 24.8354  | 0.295207 | 10.5088 |
| AAELO04094 | pou domain                                                   | 10.4572  | 10.5159  | 13.6476  | 12.3915  | 8.79946  | 8.28258  | 0.117834 | 5.96466 |
| AAELO11763 | PP03                                                         | 18.2385  | 19.2507  | 0.8439   | 0.925506 | 4.1877   | 4.11761  | 2.50916  | 8.08382 |
| AAELO13492 | PP05                                                         | 92.8369  | 84.5286  | 0.239332 | 0.485359 | 1.76963  | 2.16931  | 13.081   | 49.6011 |
| AAELO00851 | predicted G-protein coupled receptor (GPCR)                  | 2.15171  | 3.36176  | 3.31997  | 3.60899  | 8.9969   | 4.5863   | 92.1739  | 35.9037 |
| AAELO06720 | predicted protein                                            | 10.6377  | 10.8903  | 11.8945  | 11.1884  | 7.44133  | 6.51761  | 0.123952 | 8.10358 |
| AAELO07751 | predicted protein                                            | 87.2793  | 78.9235  | 134.776  | 136.172  | 64.7743  | 64.674   | 322.875  | 158.312 |
| AAELO14511 | predicted protein                                            | 44.1299  | 37.4346  | 64.4407  | 55.7601  | 37.2599  | 44.3947  | 26.6354  | 37.7136 |
| AAELO04467 | predicted protein                                            | 99.3317  | 100.488  | 134.78   | 101.475  | 64.6138  | 61.3223  | 57.7993  | 70.9642 |
| AAELO00647 | predicted protein                                            | 1.43077  | 0.517038 | 1.51875  | 1.45883  | 2.56082  | 5.13802  | 1497.82  | 709.36  |
| AAELO01996 | predicted protein                                            | 27.0846  | 26.9871  | 41.6445  | 37.1731  | 30.4313  | 29.8543  | 6.29801  | 18.5277 |
| AAELO02580 | predicted protein                                            | 20.6868  | 21.2936  | 15.3287  | 24.5715  | 84.8565  | 89.4552  | 0.995648 | 6.90524 |
| AAELO04484 | predicted protein                                            | 183.362  | 177.314  | 337.337  | 271.377  | 186.022  | 184.425  | 67.1322  | 131.357 |
| AAELO09219 | predicted protein                                            | 0.019456 | 0.041807 | 0.081013 | 0.047792 | 1.94241  | 1.48492  | 143.364  | 61.6031 |
| AAELO03180 | prefoldin subunit                                            | 58.3286  | 57.7668  | 45.2661  | 46.828   | 62.1629  | 58.4411  | 39.4909  | 49.8232 |
| AAELO02337 | prefoldin, subunit, putative                                 | 79.3092  | 86.2753  | 74.476   | 67.898   | 84.124   | 82.0553  | 47.4658  | 62.1348 |
| AAELO09959 | pre-mrna splicing factor prp8                                | 38.8903  | 35.2527  | 33.1234  | 37.6244  | 27.0519  | 27.7714  | 20.6478  | 28.4871 |
| AAELO04523 | preprotein translocase secy subunit (sec61)                  | 335.983  | 498.068  | 123.331  | 124.244  | 102.368  | 109.942  | 188.249  | 286.61  |

|             |                                                      |          |          |          |          |          |          |          |         |
|-------------|------------------------------------------------------|----------|----------|----------|----------|----------|----------|----------|---------|
| AAELO10716  | preprotein translocase secy subunit (sec61)          | 43.559   | 74.0907  | 16.0745  | 15.7664  | 36.6735  | 36.1584  | 94.0614  | 75.6853 |
| AAELO002196 | procathepsin L3, putative                            | 20.7485  | 8.72391  | 0.461364 | 13.4924  | 1.78467  | 1.09738  | 0.939187 | 4.20321 |
| AAELO13353  | profilin                                             | 292.541  | 305.022  | 515.484  | 337.136  | 208.376  | 211.911  | 712.517  | 423.415 |
| AAELO11271  | programmed cell death 6-interacting protein          | 36.3713  | 33.499   | 35.9305  | 33.4912  | 48.2631  | 43.055   | 110.19   | 57.7601 |
| AAELO005910 | programmed cell death protein                        | 32.8178  | 32.3659  | 35.8687  | 31.5057  | 38.955   | 33.8455  | 139.713  | 63.4532 |
| AAELO11803  | prohibitin, putative                                 | 8.72274  | 6.84747  | 9.77885  | 13.8617  | 17.5365  | 18.8783  | 208.789  | 79.574  |
| AAELO12545  | proliferating cell nuclear antigen                   | 166.203  | 161.17   | 205.918  | 213.576  | 53.2825  | 57.1303  | 28.9997  | 89.0635 |
| AAELO12312  | proliferation-associated 2g4 (pa2g4/ebp1)            | 147.039  | 157.811  | 35.8708  | 46.9281  | 144.929  | 133.145  | 61.3776  | 113.864 |
| AAELO13431  | proline oxidase                                      | 25.917   | 26.4594  | 35.4587  | 32.2357  | 23.9231  | 24.2772  | 1.63768  | 16.3186 |
| AAELO12351  | prolylcarboxypeptidase, putative                     | 0.069499 | 0.122726 | 0.104587 | 0.121294 | 0.06229  | 0.337299 | 265.196  | 127.822 |
| AAELO009038 | prolylcarboxypeptidase, putative                     | 87.9953  | 84.144   | 6.23165  | 7.27946  | 40.2144  | 36.2033  | 7.55372  | 46.7493 |
| AAELO12561  | prominin (prom) protein                              | 14.5303  | 16.2182  | 27.4335  | 17.49    | 20.5684  | 20.0177  | 301.078  | 115.854 |
| AAELO10725  | proprotein convertase subtilisin/kexin type 4, furin | 11.4523  | 11.2378  | 20.8779  | 64.2097  | 7.13736  | 6.99616  | 7.16065  | 8.1339  |
| AAELO12099  | protease m1 zinc metalloprotease                     | 6.23376  | 5.80158  | 3.82266  | 3.68396  | 6.04979  | 4.36897  | 104.896  | 38.0573 |
| AAELO003212 | protease m1 zinc metalloprotease                     | 0.046605 | 0        | 0.016944 | 0.039338 | 0.256768 | 0.162692 | 100.327  | 31.257  |
| AAELO13899  | protease m1 zinc metalloprotease                     | 0.206535 | 0.160089 | 0.55257  | 0.155395 | 0.610265 | 0.800558 | 676.217  | 346.024 |
| AAELO008155 | protease m1 zinc metalloprotease                     | 0.01727  | 0.009854 | 0.136118 | 0.064893 | 0.490842 | 0.442605 | 141.68   | 65.72   |
| AAELO12778  | protease m1 zinc metalloprotease                     | 0.274658 | 0.296106 | 0.471389 | 0.4258   | 3.42181  | 3.73185  | 880.061  | 453.529 |
| AAELO12217  | protease m1 zinc metalloprotease                     | 53.0158  | 52.058   | 118.498  | 109.605  | 44.6278  | 43.8743  | 1.14098  | 25.9634 |
| AAELO12783  | protease m1 zinc metalloprotease                     | 2.03101  | 0.789959 | 0.474782 | 0.451966 | 2.38835  | 3.62551  | 1914.78  | 1100.17 |
| AAELO12776  | protease m1 zinc metalloprotease                     | 0.356933 | 0.415662 | 0.405362 | 0.179858 | 1.00459  | 1.51362  | 1109.83  | 533.812 |
| AAELO12781  | protease m1 zinc metalloprotease                     | 1.32079  | 1.41484  | 1.38174  | 2.4322   | 1.53283  | 1.54064  | 147.246  | 78.0077 |
| AAELO14671  | protease S51 alpha-aspartyl dipeptidase              | 14.8724  | 12.2407  | 9.35929  | 12.8526  | 6.47941  | 6.29104  | 167.484  | 60.0119 |
| AAELO15036  | protease S51 alpha-aspartyl dipeptidase              | 12.672   | 14.5154  | 9.06885  | 10.993   | 7.39183  | 7.79043  | 484.046  | 244.882 |
| AAELO009898 | proteasome subunit alpha type                        | 68.0213  | 67.1989  | 50.2106  | 50.8902  | 54.2304  | 58.3757  | 152.636  | 84.4998 |
| AAELO10829  | protein arginine n-methyltransferase                 | 11.6876  | 13.4146  | 16.6036  | 13.6685  | 12.522   | 13.6992  | 2.16549  | 6.84232 |
| AAELO003179 | protein arginine n-methyltransferase 1, putative     | 162.05   | 161.302  | 330.592  | 265.976  | 200.434  | 199.589  | 24.6642  | 85.4206 |
| AAELO008319 | protein disulfide isomerase                          | 72.3882  | 68.6256  | 76.9024  | 73.844   | 49.4231  | 50.9544  | 55.5152  | 62.0545 |
| AAELO000641 | protein disulfide isomerase                          | 596.977  | 895.167  | 155.552  | 190.747  | 243.05   | 250.177  | 625.053  | 653.309 |
| AAELO001432 | protein disulfide isomerase                          | 408.352  | 466.619  | 205.196  | 213.661  | 189.436  | 191.788  | 252.377  | 317.437 |
| AAELO10065  | protein disulfide-isomerase A6 precursor             | 115.649  | 158.174  | 82.3817  | 79.5993  | 68.3382  | 91.2913  | 234.714  | 164.305 |

|            |                                                                                        |         |         |          |          |          |         |          |         |
|------------|----------------------------------------------------------------------------------------|---------|---------|----------|----------|----------|---------|----------|---------|
| AAEL000421 | protein farnesyltransferase alpha subunit/rab geranylgeranyl transferase alpha subunit | 21.8601 | 23.3892 | 42.6328  | 37.5289  | 18.5969  | 20.4611 | 2.07717  | 14.0362 |
| AAEL001108 | protein kinase c                                                                       | 16.7702 | 17.639  | 15.6285  | 17.6677  | 20.58    | 17.669  | 0.575406 | 6.44192 |
| AAEL002722 | protein kinase C inhibitor, putative                                                   | 15.159  | 18.324  | 22.6687  | 41.242   | 23.3788  | 25.2446 | 25.2867  | 44.6447 |
| AAEL005131 | protein kinase c-binding protein nell1                                                 | 10.9079 | 10.5809 | 0.266029 | 0.343692 | 1.28494  | 1.39144 | 0.079054 | 5.86578 |
| AAEL007634 | Protein KRTCAP2 homolog                                                                | 74.4477 | 94.8854 | 39.7402  | 34.6016  | 27.2502  | 29.515  | 46.012   | 54.0186 |
| AAEL008595 | Protein maelstrom homolog                                                              | 162.703 | 160.112 | 66.4626  | 98.4425  | 155.437  | 160.636 | 2.24519  | 84.4514 |
| AAEL004410 | protein phosphatase                                                                    | 10.926  | 10.1361 | 11.1496  | 11.1929  | 11.5133  | 11.2829 | 0.991623 | 4.78761 |
| AAEL007171 | protein phosphatase 2c                                                                 | 34.4976 | 31.9704 | 53.0941  | 47.5894  | 26.6321  | 27.7058 | 1.22802  | 18.6753 |
| AAEL001441 | protein phosphatase 2c gamma                                                           | 105.804 | 101.085 | 153.886  | 148.201  | 89.9162  | 88.9067 | 39.6032  | 64.078  |
| AAEL014042 | protein phosphatase pp2a regulatory subunit b                                          | 54.9086 | 68.5062 | 62.8517  | 61.4903  | 64.507   | 49.4772 | 69.6253  | 79.6806 |
| AAEL004709 | protein phosphatase type 2c                                                            | 46.2861 | 46.1227 | 23.3133  | 26.7413  | 26.0199  | 27.0959 | 357.74   | 188.386 |
| AAEL004262 | protein phosphatases ppl regulatory subunit                                            | 7.055   | 8.26379 | 20.0271  | 18.0878  | 7.10739  | 6.55975 | 0.557172 | 5.05951 |
| AAEL004040 | protein phosphatase-2a                                                                 | 75.9303 | 78.1186 | 116.867  | 91.1769  | 57.1229  | 58.3659 | 37.5521  | 52.8962 |
| AAEL008863 | protein regulator of cytokinesis 1 prcl                                                | 27.44   | 26.1218 | 66.7297  | 75.1692  | 13.4991  | 15.097  | 3.41841  | 16.9451 |
| AAEL001969 | protein serine/threonine kinase, putative                                              | 11.019  | 11.3755 | 4.91408  | 4.44303  | 8.85416  | 20.5126 | 29.5262  | 23.1141 |
| AAEL012659 | protein serine/threonine kinase, putative                                              | 24.7943 | 22.552  | 76.6662  | 53.1612  | 23.2739  | 18.7591 | 0.691132 | 17.0073 |
| AAEL013989 | protein translocation complex beta subunit, putative                                   | 137.742 | 234.644 | 44.9954  | 42.0559  | 65.2612  | 70.405  | 126.47   | 159.693 |
| AAEL008777 | proto-oncogene tyrosine-protein kinase abl1                                            | 22.8291 | 22.2556 | 19.5154  | 23.7174  | 22.253   | 22.5107 | 3.63799  | 11.8301 |
| AAEL004663 | pseudouridylate synthase                                                               | 18.5483 | 17.3234 | 27.0913  | 23.3849  | 25.2543  | 23.182  | 5.4695   | 11.0188 |
| AAEL004142 | psidin                                                                                 | 21.6925 | 21.3209 | 24.319   | 23.0305  | 29.2899  | 28.7405 | 5.38985  | 14.0199 |
| AAEL013733 | Psq-DNA binding domain protein, putative                                               | 21.227  | 21.2643 | 29.0074  | 25.8946  | 18.3785  | 18.903  | 0.248356 | 11.9838 |
| AAEL005065 | ptpla domain protein                                                                   | 25.118  | 29.0165 | 11.8997  | 18.4474  | 16.965   | 20.3985 | 19.1037  | 33.512  |
| AAEL008391 | ptxl protein                                                                           | 20.9295 | 20.3193 | 19.2037  | 20.0904  | 14.4088  | 15.5918 | 3.77779  | 9.28736 |
| AAEL001735 | pupal cuticle protein 78E, putative                                                    | 6.46767 | 7.68858 | 3.42074  | 5.76499  | 0.914828 | 2.18756 | 0        | 8.16791 |
| AAEL013515 | Pupal cuticle protein, putative                                                        | 204.404 | 208.77  | 169.639  | 167.387  | 421.189  | 406.043 | 0.560392 | 54.0922 |
| AAEL003606 | purine biosynthesis protein 6, pur6                                                    | 89.7708 | 158.506 | 74.832   | 45.418   | 76.6978  | 61.5164 | 30.3147  | 70.757  |
| AAEL002269 | purine nucleoside phosphorylase                                                        | 137.139 | 213.455 | 56.1998  | 37.446   | 84.2747  | 79.9805 | 110.352  | 148.695 |
| AAEL009601 | pyridoxine kinase                                                                      | 39.5338 | 33.6299 | 44.1468  | 39.5152  | 141.586  | 120.568 | 697.165  | 343.327 |
| AAEL005422 | pyrroline-5-carboxylate dehydrogenase                                                  | 32.2065 | 33.3697 | 36.7783  | 36.5923  | 19.9222  | 21.9496 | 12.347   | 20.4513 |

|            |                                                                                           |         |         |         |         |         |         |          |         |
|------------|-------------------------------------------------------------------------------------------|---------|---------|---------|---------|---------|---------|----------|---------|
| AAEL013831 | pyrroline-5-carboxylate dehydrogenase                                                     | 23.9192 | 21.6801 | 26.1908 | 25.3422 | 15.6219 | 13.7012 | 7.06648  | 15.1694 |
| AAEL007033 | pyrroline-5-carboxylate reductase                                                         | 33.6081 | 34.3918 | 22.9034 | 29.6    | 51.4619 | 45.6195 | 148.499  | 76.7199 |
| AAEL008366 | pyruvate dehydrogenase                                                                    | 23.7188 | 26.9762 | 23.6613 | 23.6045 | 26.6456 | 24.9704 | 12.1968  | 21.0273 |
| AAEL007375 | pyruvate dehydrogenase                                                                    | 95.3412 | 96.8935 | 68.7471 | 55.3    | 59.8703 | 60.3944 | 412.813  | 249.429 |
| AAEL014913 | pyruvate kinase                                                                           | 13.5188 | 8.88456 | 3.65212 | 7.42955 | 3.04459 | 6.36953 | 32.6721  | 10.6066 |
| AAEL000016 | Q0C7C4                                                                                    | 31.8054 | 30.2701 | 32.1556 | 27.1342 | 43.0571 | 41.6531 | 9.63018  | 22.4662 |
| AAEL014561 | Q16G12                                                                                    | 12082.6 | 9396.17 | 4.01591 | 477.779 | 2.42096 | 2.75949 | 84.4884  | 3881.73 |
| AAEL013027 | Q16KE2                                                                                    | 9290.84 | 5539.29 | 10.9921 | 1416.74 | 1.53095 | 1.67082 | 90.6437  | 4641.81 |
| AAEL010993 | queuine tRNAbsyltransferase                                                               | 9.65076 | 8.82629 | 4.98202 | 6.0719  | 13.731  | 14.2881 | 1.47586  | 5.57029 |
| AAEL012054 | Quiescin-sulfhydryl oxidase4, putative                                                    | 86.9949 | 105.094 | 220.652 | 39.8836 | 60.0159 | 56.1091 | 55.6799  | 71.8545 |
| AAEL007845 | rab5                                                                                      | 106.089 | 103.886 | 55.3105 | 73.1331 | 84.0487 | 92.5622 | 253.293  | 141.476 |
| AAEL009495 | rab6-interacting                                                                          | 24.4099 | 23.668  | 32.0761 | 33.0438 | 21.0611 | 19.9405 | 7.60247  | 15.8036 |
| AAEL007176 | rabkinesin-6                                                                              | 39.716  | 40.5618 | 47.078  | 46.9089 | 28.5445 | 28.3918 | 1.57757  | 23.3807 |
| AAEL009732 | rac gtpase                                                                                | 55.9996 | 52.4055 | 51.3437 | 49.6889 | 36.0522 | 36.7557 | 163.06   | 86.1069 |
| AAEL010342 | racgtpase-activating protein                                                              | 14.4981 | 14.3943 | 21.1098 | 21.2516 | 12.3339 | 14.1141 | 1.67129  | 8.11556 |
| AAEL013069 | Rack1                                                                                     | 1015.16 | 1035.07 | 388.098 | 348.684 | 3088.58 | 3277.16 | 1413.84  | 1330.24 |
| AAEL011307 | RAD51C protein, putative                                                                  | 4.59649 | 3.69034 | 8.88606 | 10.7323 | 2.65961 | 1.99347 | 0.610999 | 4.37059 |
| AAEL012151 | ral guanine nucleotide exchange factor<br>with ph domain and sh3 binding motif,<br>ralgps | 32.0584 | 33.5628 | 48.1196 | 41.8698 | 30.7401 | 30.9263 | 10.4899  | 21.5163 |
| AAEL009287 | ran                                                                                       | 247.275 | 271.319 | 187.249 | 178.366 | 288.034 | 285.903 | 206.222  | 197.342 |
| AAEL007858 | ran gtpase-activating protein                                                             | 19.0639 | 21.2049 | 26.5305 | 22.1334 | 24.1923 | 23.2481 | 6.69846  | 12.8204 |
| AAEL009884 | ran-binding protein                                                                       | 38.1954 | 35.8988 | 32.9092 | 32.7602 | 25.6478 | 26.6683 | 12.9104  | 23.5637 |
| AAEL005998 | rap gtpase-activating protein                                                             | 23.717  | 28.2391 | 30.1808 | 28.4883 | 24.9615 | 24.5606 | 11.1809  | 19.7122 |
| AAEL011870 | rap55                                                                                     | 451.612 | 428.47  | 534.086 | 496.92  | 261.84  | 256.565 | 51.7791  | 251.443 |
| AAEL009377 | RAS protein, putative                                                                     | 78.3499 | 92.7455 | 133.18  | 101.027 | 62.8125 | 63.0627 | 79.3096  | 77.2968 |
| AAEL005069 | raslated protein Rab-1A, putative                                                         | 164.316 | 175.764 | 149.565 | 148.139 | 119.362 | 119.607 | 350.968  | 207.073 |
| AAEL004902 | raslated protein Rab-2A, putative                                                         | 36.7768 | 39.5393 | 57.3618 | 54.4377 | 38.0524 | 37.3285 | 148.948  | 81.986  |
| AAEL008029 | raslated protein, putative                                                                | 16.6746 | 13.3521 | 13.946  | 13.3506 | 10.3017 | 11.1326 | 0        | 7.69062 |
| AAEL011892 | receptor for activated C kinase, putative                                                 | 50.6207 | 45.8913 | 182.427 | 120.444 | 57.5213 | 61.332  | 23.8788  | 36.0548 |
| AAEL002404 | receptor protein tyrosine kinase                                                          | 242.678 | 315.534 | 79.2679 | 92.2494 | 73.3717 | 84.0064 | 194.454  | 220.064 |
| AAEL007123 | receptor tyrosine kinase                                                                  | 14.0088 | 11.7714 | 12.1611 | 14.7828 | 16.2779 | 16.5074 | 0.534945 | 4.36004 |
| AAEL001623 | REG                                                                                       | 111.601 | 115.802 | 130.379 | 115.643 | 163.285 | 176.493 | 88.7507  | 98.2036 |
| AAEL008575 | regulator of chromosome condensation                                                      | 74.5934 | 73.421  | 121.932 | 118.323 | 22.3349 | 23.4509 | 34.2322  | 57.3172 |
| AAEL007799 | regulator of chromosome condensation                                                      | 237.445 | 256.888 | 151.166 | 151.606 | 151.792 | 152.417 | 32.4843  | 140.592 |

|            |                                                                         |          |          |         |          |         |          |          |         |
|------------|-------------------------------------------------------------------------|----------|----------|---------|----------|---------|----------|----------|---------|
| AAEL007624 | REL2                                                                    | 4.58942  | 4.29575  | 4.65917 | 4.42451  | 20.6604 | 12.6199  | 43.2877  | 18.0231 |
| AAEL007291 | replication factor A, 14kD-subunit, putative                            | 55.564   | 59.9672  | 74.2933 | 71.0677  | 49.6707 | 48.1208  | 16.2503  | 36.9185 |
| AAEL009465 | replication factor c / DNA polymerase iii gamma-tau subunit             | 33.0973  | 32.4517  | 35.0297 | 38.0444  | 31.8608 | 28.6538  | 3.08687  | 17.5658 |
| AAEL001324 | replication factor C large subunit, putative                            | 21.293   | 21.6289  | 22.3588 | 22.507   | 21.1191 | 19.7507  | 3.98026  | 12.5058 |
| AAEL006788 | replication factor C, 37-kDa subunit, putative                          | 26.9307  | 25.1135  | 20.2267 | 23.9369  | 19.5027 | 21.0132  | 2.67218  | 14.0783 |
| AAEL006223 | replication factor C, 37kD-subunit, putative                            | 29.3361  | 26.5514  | 27.4447 | 28.35    | 16.6791 | 17.7016  | 10.54    | 20.1761 |
| AAEL010422 | replication-associated histone mRNA stem loop-binding protein, putative | 61.7623  | 60.8013  | 68.0697 | 65.4396  | 38.4281 | 36.5048  | 3.48337  | 29.8934 |
| AAEL011279 | requim, req/dpf2                                                        | 35.201   | 30.0342  | 60.2677 | 47.6513  | 17.7973 | 19.2166  | 7.13895  | 21.4696 |
| AAEL001126 | rest corepressor (corest) protein                                       | 68.6966  | 72.234   | 81.0613 | 70.7982  | 69.325  | 71.7581  | 42.8955  | 58.2889 |
| AAEL007725 | reticulocalbin                                                          | 30.6594  | 34.1348  | 12.2101 | 10.4143  | 13.6931 | 14.6074  | 11.6098  | 19.8472 |
| AAEL000713 | reticulon/nogo                                                          | 129.478  | 220.722  | 78.7689 | 77.4784  | 50.3926 | 50.4208  | 52.3751  | 102.201 |
| AAEL006045 | reticulon/nogo receptor                                                 | 3.27866  | 6.67477  | 5.60071 | 5.12541  | 2.16263 | 0.239516 | 0        | 6.79266 |
| AAEL010910 | retina aberrant in pattern, putative                                    | 14.9765  | 13.9757  | 34.4316 | 34.3754  | 12.6761 | 14.5754  | 0.155197 | 7.81963 |
| AAEL009882 | retinoblastoma-binding protein 4 (rbbp4)                                | 122.274  | 109.915  | 230.098 | 221.595  | 53.4058 | 55.2203  | 31.5457  | 74.8273 |
| AAEL007926 | retinoid-inducible serine carboxypeptidase (serine carboxypeptidase     | 0.669591 | 0.568895 | 0.2233  | 0.577783 | 2.81953 | 2.10541  | 1478.66  | 614.652 |
| AAEL009291 | retinoid-inducible serine carboxypeptidase (serine carboxypeptidase     | 201.057  | 217.564  | 33.1182 | 27.8357  | 77.7904 | 84.5459  | 56.7802  | 129.037 |
| AAEL006542 | retinoid-inducible serine carboxypeptidase (serine carboxypeptidase     | 404.942  | 528.493  | 6.5766  | 7.51211  | 8.20055 | 7.34788  | 23.1681  | 223.633 |
| AAEL007581 | Rfc5p, putative                                                         | 17.7944  | 18.9624  | 24.2515 | 21.7152  | 12.9044 | 15.3783  | 1.18169  | 9.72095 |
| AAEL013752 | rfx5                                                                    | 13.9026  | 13.6045  | 8.24337 | 9.49413  | 13.891  | 13.7751  | 0.197942 | 7.23318 |
| AAEL012658 | rgs-gaip interacting protein gipc                                       | 13.7904  | 11.0249  | 4.10177 | 7.0012   | 2.015   | 2.16349  | 209.789  | 90.4079 |
| AAEL008881 | RHC18, putative                                                         | 25.4099  | 25.9585  | 17.8374 | 21.0513  | 12.2375 | 13.6816  | 12.7744  | 21.6654 |
| AAEL000509 | rho gtpase activating protein                                           | 14.61    | 14.8359  | 25.5227 | 16.0095  | 12.4123 | 12.1024  | 2.91346  | 8.86121 |
| AAEL009157 | RHO GTPase activator, putative                                          | 21.5828  | 21.0758  | 18.5142 | 20.4228  | 19.9817 | 20.4982  | 7.09168  | 13.4201 |
| AAEL012996 | rho guanine dissociation factor                                         | 69.5959  | 68.9125  | 73.5304 | 63.5868  | 72.3169 | 71.0818  | 274.232  | 147.918 |
| AAEL013487 | RHO guanyl-nucleotide exchange factor, putative                         | 26.5515  | 25.0717  | 42.3986 | 34.2502  | 31.0306 | 30.6551  | 6.34714  | 16.7185 |

|            |                                                                     |         |         |         |         |         |         |         |         |
|------------|---------------------------------------------------------------------|---------|---------|---------|---------|---------|---------|---------|---------|
| AAEL003587 | rhogtpase                                                           | 12.3754 | 12.7818 | 4.78363 | 5.78016 | 10.3716 | 9.78907 | 75.1653 | 37.0059 |
| AAEL003510 | ribonuclease hi large subunit                                       | 40.4358 | 41.6984 | 51.2634 | 54.5387 | 30.4374 | 30.903  | 4.08411 | 18.5214 |
| AAEL004119 | ribonuclease p/mrp subunit                                          | 8.26659 | 7.72332 | 14.2586 | 12.8345 | 4.72361 | 3.9085  | 117.217 | 48.9611 |
| AAEL003716 | ribonuclease UK114, putative                                        | 83.1737 | 111.078 | 46.2743 | 48.3834 | 102.992 | 101.413 | 2.10631 | 32.3535 |
| AAEL003492 | ribonuclease, putative                                              | 98.7161 | 94.9198 | 76.2168 | 68.281  | 102.681 | 114.892 | 1019.28 | 574.563 |
| AAEL011089 | ribonucleoprotein                                                   | 75.9156 | 76.5705 | 64.4807 | 77.7667 | 57.0555 | 53.1044 | 30.6711 | 48.7649 |
| AAEL010644 | ribonucleoside-diphosphate reductase large chain                    | 69.1678 | 59.2798 | 296.306 | 239.063 | 15.9271 | 14.8554 | 20.8078 | 48.486  |
| AAEL010691 | ribonucleoside-diphosphate reductase small chain                    | 273.238 | 235.954 | 443.156 | 232.561 | 45.8988 | 42.4291 | 70.42   | 171.236 |
| AAEL013071 | ribophorin                                                          | 142.458 | 183.787 | 48.7417 | 50.3612 | 77.0917 | 75.9478 | 124.611 | 134.938 |
| AAEL015572 | ribophorin ii                                                       | 47.8034 | 61.6965 | 19.4604 | 17.4981 | 26.9717 | 27.023  | 36.1474 | 48.5316 |
| AAEL010521 | ribophorin ii                                                       | 52.1583 | 74.6475 | 24.2228 | 21.6024 | 27.0754 | 28.9048 | 46.6459 | 44.5565 |
| AAEL014449 | ribose-phosphate pyrophosphokinase 1, putative                      | 25.8975 | 36.0159 | 19.9867 | 16.424  | 34.4476 | 28.8324 | 4.30765 | 17.4824 |
| AAEL004178 | ribose-phosphate pyrophosphokinase 1, putative                      | 242.884 | 295.961 | 164.387 | 115.758 | 297.134 | 255.552 | 48.9379 | 162.049 |
| AAEL001037 | ribosomal RNA methyltransferase                                     | 17.3927 | 15.5793 | 16.0802 | 15.9525 | 35.7154 | 32.9535 | 5.00775 | 13.4212 |
| AAEL011282 | ribosomal RNA small subunit methyltransferase b (sun)               | 47.5271 | 50.6309 | 57.3621 | 45.045  | 62.1787 | 61.642  | 8.66721 | 28.5413 |
| AAEL003555 | ribosome biogenesis protein                                         | 18.6912 | 18.9336 | 24.6113 | 21.6574 | 21.3154 | 22.0083 | 3.47774 | 9.85191 |
| AAEL001169 | ribosome biogenesis protein bopl (block of proliferation 1 protein) | 19.681  | 20.966  | 22.2384 | 17.2591 | 35.7749 | 37.4797 | 6.2493  | 12.8913 |
| AAEL012185 | ribosome biogenesis regulatory protein                              | 37.9015 | 40.0198 | 51.3424 | 44.9975 | 33.3863 | 32.3093 | 8.84275 | 26.0331 |
| AAEL010505 | ribulose-5-phosphate-3-epimerase                                    | 34.1549 | 37.0179 | 52.843  | 39.839  | 32.6474 | 36.2307 | 34.9148 | 41.6126 |
| AAEL004691 | ring finger                                                         | 215.144 | 208.03  | 308.255 | 275.569 | 210.627 | 221.426 | 223.277 | 190.526 |
| AAEL006839 | ring finger protein                                                 | 29.9654 | 29.787  | 48.0742 | 40.9924 | 21.3499 | 23.2005 | 15.5262 | 24.3211 |
| AAEL005114 | RNA and export factor binding protein                               | 75.0715 | 79.2828 | 31.7604 | 45.0252 | 42.5413 | 45.4745 | 35.7731 | 60.1391 |
| AAEL011251 | RNA binding motif protein                                           | 29.1789 | 26.7537 | 34.4876 | 29.5119 | 22.6673 | 22.8659 | 11.4005 | 19.1046 |
| AAEL013982 | RNA binding motif protein 4, lark                                   | 108.866 | 114.061 | 50.8256 | 62.591  | 48.8166 | 50.0208 | 58.726  | 82.5552 |
| AAEL000674 | RNA m5u methyltransferase                                           | 21.7638 | 23.2526 | 21.4056 | 20.599  | 27.13   | 30.4302 | 4.56057 | 13.5853 |
| AAEL014831 | RNA polymerase II subunit Rpb10, putative                           | 38.8354 | 44.5954 | 66.1164 | 55.9718 | 51.578  | 54.3718 | 34.5778 | 43.6491 |
| AAEL013457 | RNA polymerase small Zn-binding subunit, putative                   | 109.412 | 120.765 | 90.7703 | 101.399 | 95.9254 | 123.463 | 50.0045 | 59.3839 |
| AAEL012171 | RNA recognition motif protein split ends                            | 66.1224 | 61.7269 | 25.3075 | 63.0207 | 38.501  | 47.1039 | 31.6329 | 51.8837 |

|            |                                                 |         |         |         |         |         |         |          |         |
|------------|-------------------------------------------------|---------|---------|---------|---------|---------|---------|----------|---------|
| AAELO13869 | RNA-binding protein                             | 35.5555 | 35.0308 | 33.6834 | 35.2812 | 55.6039 | 54.0985 | 14.7455  | 25.675  |
| AAELO07013 | RNA-binding protein precursor, putative         | 14.8478 | 13.4328 | 22.0369 | 23.9339 | 15.8771 | 16.4004 | 0.58784  | 6.09954 |
| AAELO08572 | RNA-binding protein, putative                   | 12.3419 | 13.0788 | 12.9573 | 13.9754 | 16.0012 | 15.2782 | 2.36189  | 8.53336 |
| AAELO03572 | rnase h (70)                                    | 14.5352 | 14.8236 | 4.66057 | 7.50618 | 18.5964 | 16.3242 | 4.13494  | 9.58467 |
| AAELO03382 | Ro ribonucleoprotein autoantigen, putative      | 76.248  | 71.9883 | 35.7682 | 56.1331 | 54.0858 | 49.1142 | 3.08403  | 35.5189 |
| AAELO10904 | rothmund-thomson syndrome DNA helicase<br>recq4 | 11.6305 | 10.0625 | 21.0192 | 18.8094 | 7.37844 | 7.52339 | 0.660897 | 5.6715  |
| AAELO02534 | RpL10                                           | 1725.89 | 1849.92 | 771.133 | 649.591 | 5300.84 | 5204.66 | 3673.87  | 3042.1  |
| AAELO13221 | RpL10a                                          | 1174.95 | 1244.29 | 477.916 | 430.419 | 3276.01 | 3250.24 | 1950.3   | 1565.37 |
| AAELO12944 | RpL11                                           | 1358.41 | 1410.29 | 652.881 | 567.603 | 4053.3  | 4010.05 | 2147.93  | 1802.11 |
| AAELO14562 | RpL12                                           | 836.372 | 912.33  | 396.867 | 338.76  | 2213.92 | 2118.21 | 1561.31  | 1178.98 |
| AAELO09825 | RpL13a                                          | 1507.78 | 1593.38 | 597.5   | 538.429 | 3756.5  | 3862.94 | 2495.41  | 2135.67 |
| AAELO11447 | RpL14                                           | 1696.36 | 1773.9  | 695.299 | 643.591 | 4500.42 | 4575.38 | 2685.87  | 2376.12 |
| AAELO12736 | RpL15                                           | 1142.37 | 1177.61 | 408.098 | 421.752 | 3015.72 | 3004.56 | 1900.68  | 1615.91 |
| AAELO08481 | RpL18                                           | 1415.41 | 1476.73 | 637.974 | 570.704 | 3789.06 | 3723.89 | 2772.09  | 1953.47 |
| AAELO06785 | RpL18a                                          | 1599.28 | 1663.93 | 686.185 | 596.674 | 4141.28 | 4175.21 | 2999.61  | 2453.04 |
| AAELO12733 | RpL19                                           | 697.567 | 776.023 | 375.516 | 353.033 | 1815.55 | 1781.67 | 1411.92  | 1095.56 |
| AAELO07715 | RpL21                                           | 1207.91 | 1229.68 | 474.818 | 461.479 | 2878.35 | 3016.44 | 2081.7   | 1735.21 |
| AAELO07771 | RpL22                                           | 2248.19 | 2370.73 | 631.699 | 773.031 | 4953.09 | 5053.43 | 4488.05  | 3244.7  |
| AAELO13097 | RpL23                                           | 704.232 | 731.627 | 374.975 | 312.261 | 2342.49 | 1966.46 | 1389.19  | 1166.95 |
| AAELO15006 | RpL23                                           | 108.868 | 114.26  | 41.7977 | 53.6783 | 170.825 | 372.301 | 255.343  | 107.59  |
| AAELO08329 | RpL24                                           | 1279.4  | 1314.83 | 598.836 | 560.242 | 3462.53 | 3469.62 | 1879.79  | 1720.35 |
| AAELO12681 | RpL24                                           | 168.733 | 165.102 | 161.806 | 132.566 | 625.284 | 605.743 | 263.77   | 200.367 |
| AAELO05722 | RpL26                                           | 1055.92 | 1103.73 | 524.298 | 476.621 | 3384.02 | 3396    | 2017.31  | 1605.64 |
| AAELO05817 | RpL26                                           | 1434.68 | 1532.17 | 649.176 | 606.803 | 4206.26 | 4235.68 | 2527.38  | 2078.65 |
| AAELO11587 | RpL27                                           | 22.108  | 11.9965 | 31.5281 | 16.3742 | 59.3172 | 55.5501 | 60.7358  | 11.3443 |
| AAELO08353 | RpL28                                           | 1505.57 | 1587.72 | 775.091 | 675.612 | 3605.22 | 3681.79 | 2630.07  | 2044.39 |
| AAELO05085 | RpL30                                           | 332.967 | 353.882 | 147.134 | 138.199 | 813.098 | 849.967 | 526.141  | 501.188 |
| AAELO05220 | RpL30                                           | 28.1158 | 30.6194 | 6.78442 | 8.22304 | 81.2801 | 68.9443 | 58.0286  | 15.2009 |
| AAELO06698 | RpL31                                           | 1712.17 | 1737.12 | 688.839 | 685.992 | 3937.55 | 3776.95 | 3226.49  | 2471.42 |
| AAELO03396 | RpL32                                           | 1463.01 | 1546.03 | 624.177 | 577.377 | 3574.73 | 3528.62 | 2497.42  | 1977.58 |
| AAELO09341 | RpL34                                           | 1192.36 | 1219.23 | 551.784 | 474.469 | 3331.93 | 3352.5  | 1999.22  | 1818.22 |
| AAELO00823 | RpL35                                           | 1398.51 | 1384.4  | 609.695 | 560.199 | 3613.17 | 3577.45 | 2302.91  | 1993.74 |
| AAELO00010 | RpL36-1                                         | 1391.08 | 1402.17 | 732.526 | 700.181 | 3263.91 | 3108.21 | 2497.61  | 1706.84 |
| AAELO02639 | RpL36-2                                         | 50.1601 | 67.9647 | 38.065  | 39.8869 | 105.554 | 138.939 | 84.0186  | 112.885 |



|            |        |         |         |         |         |         |         |         |         |
|------------|--------|---------|---------|---------|---------|---------|---------|---------|---------|
| AAELO05451 | RpL38  | 2296.97 | 2500.32 | 1063.4  | 1003.51 | 5927.66 | 5892.95 | 4298.29 | 3308.15 |
| AAELO00701 | RpL4   | 23.7354 | 26.7091 | 28.0591 | 20.8005 | 33.0913 | 33.3254 | 16.4686 | 22.898  |
| AAELO09994 | RpL4   | 968.814 | 1024.35 | 409.891 | 367.755 | 3125.03 | 2959.61 | 1952.14 | 1395.37 |
| AAELO03942 | RpL44  | 1276.19 | 1297.64 | 466.981 | 448.732 | 3909.86 | 3968.95 | 2258.92 | 1819.31 |
| AAELO08188 | RpL6   | 1462.56 | 1550.76 | 593.135 | 566.355 | 3763.84 | 3682.03 | 2844.44 | 2059.92 |
| AAELO12585 | RpL7   | 977.015 | 1017.49 | 504.382 | 439.075 | 2937.41 | 2930.57 | 1622.87 | 1361.38 |
| AAELO05629 | RpL7a  | 1083.37 | 1108.15 | 475.614 | 443.143 | 2725.92 | 2745.57 | 1955.22 | 1520.35 |
| AAELO03352 | RpL7ae | 244.14  | 278.323 | 343.195 | 295.076 | 416.798 | 434.381 | 35.0284 | 159.791 |
| AAELO00987 | RpL8   | 1363.24 | 1506.24 | 511.134 | 489.952 | 4050.87 | 4133.13 | 2018.63 | 1754.25 |
| AAELO07699 | RpL9   | 1355.92 | 1410.73 | 574.067 | 540.224 | 3690.03 | 3615.45 | 2542.72 | 2005.65 |
| AAELO10821 | RpLP0  | 825.681 | 859.013 | 324.835 | 327.061 | 2283.17 | 2425.42 | 1077.19 | 1027.64 |
| AAELO03530 | RpLP1  | 1361.43 | 1464.61 | 595.805 | 543.788 | 3155.87 | 3328.25 | 1775.99 | 1749.26 |
| AAELO14583 | RpLP2  | 3761.47 | 3909.42 | 859.075 | 1035.29 | 9032.27 | 9094.61 | 4975.28 | 4683.18 |
| AAELO02047 | RpS10  | 1207.55 | 1223.78 | 550.635 | 498.32  | 3082.05 | 3081.37 | 2258.65 | 1825.8  |
| AAELO02372 | RpS11  | 1632.37 | 1716.88 | 779.981 | 728.773 | 4079.29 | 3996.54 | 3020.17 | 2345.6  |
| AAELO10299 | RpS12  | 1466.55 | 1490.48 | 571.161 | 569.662 | 3941.63 | 3958.98 | 2724.43 | 2166.34 |
| AAELO03582 | RpS13  | 914.724 | 1029.81 | 428.726 | 402.317 | 2263.42 | 2275.55 | 1716.81 | 1354.63 |
| AAELO05266 | RpS14  | 1268.35 | 1260.08 | 512.002 | 456.344 | 3483.83 | 3459.41 | 2915.16 | 2021.39 |
| AAELO11656 | RpS15  | 1846.99 | 1861.91 | 777.811 | 739.458 | 4895.32 | 4978.98 | 3228.49 | 2524.15 |
| AAELO03427 | RpS16  | 1644.91 | 1725.29 | 785.48  | 747.733 | 4391.75 | 4365.24 | 3483.83 | 2639.24 |
| AAELO04175 | RpS17  | 1344.2  | 1388.87 | 657.329 | 584.927 | 2998.55 | 2963.68 | 2341.01 | 1859.55 |
| AAELO10756 | RpS19  | 1835.5  | 1880.66 | 911.639 | 842.976 | 4696.55 | 4635.23 | 3458.43 | 2541.34 |
| AAELO08582 | RpS2   | 36.3681 | 39.6466 | 44.8725 | 38.7387 | 52.3805 | 50.3542 | 17.8366 | 25.803  |
| AAELO10168 | RpS2   | 641.105 | 682.014 | 302.862 | 294.353 | 1811.36 | 2089.21 | 834.586 | 779.376 |
| AAELO09506 | RpS20  | 1024.99 | 1112.51 | 617.158 | 576.602 | 2682.18 | 2870.85 | 1472.47 | 1369.95 |
| AAELO04503 | RpS21  | 2417.4  | 2573.87 | 1012.66 | 993.733 | 5593.95 | 5592.29 | 4644.32 | 3794.44 |
| AAELO12686 | RpS23  | 1159.2  | 1239.3  | 633.032 | 565.944 | 2846.15 | 2833.41 | 2311.76 | 1846.96 |
| AAELO14292 | RpS24  | 224.84  | 200.253 | 109.657 | 81.5982 | 556.727 | 634.095 | 361.62  | 368.992 |
| AAELO14903 | RpS24  | 601.174 | 703.713 | 234.495 | 253.673 | 1438.04 | 1386.49 | 1095.34 | 762.147 |
| AAELO00068 | Rps25  | 1107.26 | 1065.3  | 446.594 | 477.93  | 3088.69 | 3179.96 | 2166.17 | 1710.63 |
| AAELO10573 | RpS25  | 203.851 | 283.638 | 84.8787 | 69.8515 | 523.44  | 431.188 | 341.29  | 232.522 |
| AAELO02832 | RpS26  | 1518.12 | 1601.72 | 668.136 | 702.48  | 3582.75 | 3643.67 | 2408.18 | 1988.24 |
| AAELO06860 | RpS28  | 1074.05 | 1142.49 | 521.462 | 516.76  | 2511.29 | 2555.42 | 2025.85 | 1599.77 |
| AAELO07824 | RpS29  | 2625.53 | 2832.45 | 1309.48 | 1240.07 | 5142.37 | 5455.14 | 5200.21 | 4280.85 |
| AAELO08192 | RpS3   | 999.127 | 1040.17 | 411.705 | 378.882 | 2880.79 | 2863.4  | 1581.72 | 1251.35 |

|             |                                                 |          |          |          |          |          |          |          |         |
|-------------|-------------------------------------------------|----------|----------|----------|----------|----------|----------|----------|---------|
| AAELO009653 | RpS30                                           | 1055.16  | 1099.15  | 521.122  | 467.173  | 2584.23  | 2581.19  | 2199.81  | 1659.37 |
| AAELO13158  | RpS3a                                           | 252.062  | 284.61   | 108.306  | 105.494  | 708.584  | 737.918  | 372.81   | 318.411 |
| AAELO005901 | RpS3a                                           | 970.496  | 967.461  | 404.826  | 345.051  | 2647.35  | 2486.47  | 1332.55  | 1186.95 |
| AAELO13625  | RpS5                                            | 1229.45  | 1230.77  | 526.086  | 502.247  | 3038.09  | 3006.08  | 2104.15  | 1801.37 |
| AAELO000032 | RpS6                                            | 720.992  | 757.658  | 309.064  | 302.258  | 2199.83  | 2081.76  | 1445.02  | 1010.1  |
| AAELO009151 | RpS8                                            | 1527.02  | 1636.1   | 632.124  | 608.77   | 3530.39  | 3551.38  | 2464.45  | 2021.06 |
| AAELO008103 | RpS8                                            | 1394.88  | 1437.97  | 472.57   | 430.963  | 4088.21  | 4063.45  | 2217.79  | 1777.69 |
| AAELO001759 | RpS9                                            | 1093.73  | 1197.49  | 595.424  | 565.591  | 3396.69  | 3485.49  | 1811.67  | 1553.36 |
| AAELO13694  | RpSA                                            | 271.602  | 299.315  | 126.215  | 90.4488  | 916.21   | 931.768  | 356.446  | 352.732 |
| AAELO009061 | rrm/rnp domain                                  | 47.4265  | 46.923   | 32.8298  | 49.2001  | 22.1809  | 20.0728  | 21.0616  | 29.3208 |
| AAELO12874  | rrp4                                            | 14.6001  | 12.9871  | 13.6992  | 14.0702  | 20.1542  | 19.0769  | 3.94398  | 10.1176 |
| AAELO004243 | S1 RNA binding domain protein, putative         | 14.8321  | 14.5294  | 12.7377  | 12.821   | 14.4843  | 15.7966  | 2.70894  | 8.45694 |
| AAELO14734  | saccharopine dehydrogenase                      | 8.30972  | 14.1378  | 3.9515   | 0.515736 | 1.82497  | 2.2331   | 275.943  | 166.668 |
| AAELO001176 | s-adenosylmethionine decarboxylase              | 104.405  | 116.325  | 53.8737  | 50.9571  | 120.726  | 102.991  | 500.062  | 290.298 |
| AAELO13129  | salivary gland secretion, putative              | 1.6899   | 1.24785  | 577.456  | 3765.93  | 0.445661 | 0.952463 | 0.538876 | 1.37993 |
| AAELO000149 | sap30                                           | 61.9912  | 60.0124  | 74.78    | 73.0411  | 49.2298  | 51.7687  | 13.3782  | 41.1382 |
| AAELO003046 | saposin                                         | 284.439  | 248.642  | 136.208  | 153.681  | 217.394  | 203.369  | 698.687  | 395.638 |
| AAELO10028  | sarcosine dehydrogenase                         | 47.1066  | 55.8244  | 7.86217  | 5.80693  | 13.5201  | 13.1372  | 1.57964  | 34.0995 |
| AAELO14936  | sarcosine dehydrogenase                         | 26.9058  | 46.5273  | 8.1207   | 4.4951   | 8.6297   | 7.92158  | 0.903247 | 10.5807 |
| AAELO14931  | sarml                                           | 7.04721  | 6.27644  | 10.1874  | 6.84824  | 23.4681  | 17.5483  | 66.8734  | 25.5646 |
| AAELO009192 | SCRASP1                                         | 17.777   | 16.8872  | 19.2361  | 22.7402  | 35.104   | 39.0331  | 0.745117 | 7.76252 |
| AAELO009420 | SCRBQ1                                          | 2.27818  | 2.3072   | 3.03469  | 2.82686  | 4.69859  | 3.20737  | 46.6039  | 20.6352 |
| AAELO009423 | SCRBQ2                                          | 33.5173  | 31.125   | 26.3829  | 28.6985  | 26.5387  | 25.1925  | 149.129  | 59.1912 |
| AAELO009432 | SCRBQ3                                          | 0.279239 | 0.395811 | 0.185322 | 0.091817 | 0.519512 | 0.853334 | 461.449  | 208.451 |
| AAELO001307 | SEC14, putative                                 | 412.146  | 386.766  | 1.26448  | 1.55288  | 5.22352  | 1.90758  | 103.258  | 218.826 |
| AAELO008271 | SEC14, putative                                 | 0.063781 | 0        | 0        | 0        | 0.231406 | 0.626504 | 190.553  | 108.617 |
| AAELO10344  | SEC14, putative                                 | 78.401   | 52.7348  | 1.10837  | 6.09346  | 4.43408  | 4.24482  | 3.1932   | 34.2433 |
| AAELO005471 | Sec61 protein complex gamma subunit, putative   | 456.827  | 636.727  | 168.793  | 184.126  | 159.482  | 176.211  | 450.413  | 492.641 |
| AAELO002158 | secreted ferritin G subunit precursor, putative | 209.774  | 184.874  | 392.876  | 368.558  | 209.765  | 218.257  | 907.494  | 484.864 |
| AAELO004335 | secreted ferritin G subunit precursor, putative | 7.54104  | 9.24355  | 1.0464   | 0.752892 | 0.9246   | 1.20469  | 305.452  | 124.75  |
| AAELO007383 | secreted ferritin G subunit precursor, putative | 310.554  | 375.127  | 326.672  | 318.239  | 371.269  | 387.496  | 16059.6  | 7356.27 |

|            |                                                       |         |         |          |         |         |         |          |          |
|------------|-------------------------------------------------------|---------|---------|----------|---------|---------|---------|----------|----------|
| AAEL000090 | secretory carrier-associated membrane protein (scamp) | 49.0012 | 49.6046 | 55.6941  | 47.6938 | 49.4771 | 48.5844 | 271.493  | 135.475  |
| AAEL001937 | selenium-binding protein                              | 23.5332 | 21.2935 | 7.40883  | 7.96341 | 20.1877 | 17.5505 | 144.563  | 72.2927  |
| AAEL007113 | selenophosphate synthase                              | 45.2019 | 66.4582 | 24.0801  | 20.7989 | 54.2831 | 50.3399 | 320.61   | 185.59   |
| AAEL008849 | selenophosphate synthase                              | 218.866 | 232.871 | 322.558  | 271.912 | 85.1328 | 81.3351 | 231.85   | 207.637  |
| AAEL005523 | Selenoprotein G, putative                             | 55.86   | 70.2792 | 54.8854  | 59.7851 | 35.412  | 34.3192 | 160.304  | 89.6632  |
| AAEL008952 | sentrin/sumo-specific protease                        | 38.7313 | 39.4971 | 54.1737  | 51.5367 | 40.9705 | 40.5985 | 13.5583  | 27.6978  |
| AAEL001372 | sentrin/sumo-specific protease senp7                  | 54.3465 | 56.2662 | 70.9811  | 65.7603 | 50.4498 | 48.1817 | 23.0656  | 35.7695  |
| AAEL005493 | septin                                                | 51.6779 | 51.5903 | 70.6053  | 64.6811 | 44.6627 | 44.0529 | 13.1346  | 26.2349  |
| AAEL007432 | serine collagenase 1 precursor, putative              | 3.73197 | 2.20515 | 0.587295 | 1.05913 | 1.18195 | 1.35285 | 5474.64  | 3665.14  |
| AAEL002510 | serine hydroxymethyltransferase                       | 102.466 | 149.523 | 72.2251  | 52.8486 | 140.98  | 140.921 | 19.9531  | 81.3765  |
| AAEL000706 | serine palmitoyltransferase                           | 45.1478 | 45.2223 | 58.4055  | 60.544  | 54.7795 | 52.7369 | 117.903  | 58.8016  |
| AAEL002600 | serine protease                                       | 56.5899 | 43.4128 | 61.0943  | 52.1192 | 216.07  | 196.99  | 5.44131  | 14.4909  |
| AAEL007969 | serine protease                                       | 4.44386 | 4.95497 | 4.01906  | 3.79445 | 23.6628 | 11.6293 | 0.822483 | 2.0366   |
| AAEL010867 | serine protease                                       | 24.862  | 28.4453 | 41.4619  | 36.6508 | 80.4763 | 84.1247 | 10.0216  | 16.5361  |
| AAEL006586 | serine protease                                       | 4.9837  | 1.59273 | 31.9088  | 71.0854 | 13.8059 | 10.7288 | 0.700185 | 0.620734 |
| AAEL006568 | serine protease                                       | 68.0579 | 48.3432 | 28.2067  | 56.5499 | 55.8898 | 41.2645 | 1.20052  | 12.8344  |
| AAEL002593 | serine protease                                       | 45.5838 | 40.8605 | 79.4487  | 78.2747 | 127.187 | 147.03  | 2.45784  | 22.1451  |
| AAEL002610 | serine protease                                       | 46.2829 | 21.3018 | 17.1647  | 18.0638 | 328.886 | 166.656 | 2.97038  | 6.82088  |
| AAEL010866 | serine protease                                       | 18.1086 | 17.4042 | 11.7516  | 11.4238 | 19.4009 | 19.7255 | 1.25589  | 7.28967  |
| AAEL005753 | serine protease                                       | 8.1279  | 8.41404 | 4.94646  | 5.73754 | 13.6265 | 9.62793 | 0.528708 | 5.18716  |
| AAEL014980 | serine protease inhibitor (serpin-2), putative        | 34.9374 | 35.8279 | 43.4731  | 40.1541 | 93.8638 | 95.7965 | 2.12066  | 14.1633  |
| AAEL007106 | serine protease, putative                             | 10.5217 | 11.0405 | 5.24654  | 4.96343 | 9.04725 | 7.59097 | 0.530703 | 5.26045  |
| AAEL006434 | serine protease, putative                             | 11.7441 | 11.158  | 5.61395  | 5.97147 | 52.0446 | 34.9575 | 1.41578  | 5.98632  |
| AAEL010340 | serine/arginine rich splicing factor                  | 146.525 | 161.839 | 123.329  | 119.784 | 83.5508 | 88.9994 | 91.4183  | 109.496  |
| AAEL002569 | serine/threonine kinase                               | 30.0794 | 29.003  | 36.6012  | 34.9492 | 24.245  | 24.7299 | 1.56553  | 15.8517  |
| AAEL013390 | serine/threonine protein kinase                       | 51.7456 | 52.7685 | 83.1542  | 75.4838 | 56.3323 | 59.4918 | 7.78834  | 33.2288  |
| AAEL003896 | serine/threonine protein kinase                       | 24.7219 | 24.1592 | 44.9311  | 40.523  | 24.9177 | 26.7109 | 6.00874  | 14.4894  |
| AAEL009880 | serine/threonine protein kinase                       | 13.7881 | 14.3596 | 24.7158  | 20.7946 | 10.6384 | 12.9803 | 1.32966  | 8.95051  |
| AAEL006712 | serine/threonine protein kinase                       | 48.009  | 41.6922 | 58.0997  | 65.0177 | 22.8761 | 25.1887 | 3.42483  | 28.3857  |
| AAEL007544 | serine/threonine-protein kinase chk2 (cdsl)           | 40.1035 | 37.8459 | 43.2148  | 42.9361 | 50.0294 | 48.5423 | 1.22799  | 18.8366  |
| AAEL007617 | serine/threonine-protein kinase vrk                   | 28.8391 | 30.1515 | 24.4641  | 22.5819 | 43.6574 | 46.8761 | 7.6276   | 19.1217  |
| AAEL009244 | serine-type endopeptidase, putative                   | 1.9736  | 0.26631 | 2.18524  | 2.13716 | 7.32693 | 21.4919 | 1333.73  | 686.862  |

|            |                                       |          |          |          |          |          |          |          |         |
|------------|---------------------------------------|----------|----------|----------|----------|----------|----------|----------|---------|
| AAEL001674 | serine-type endopeptidase, putative   | 0.554676 | 1.37939  | 0.618967 | 0.298141 | 0.376425 | 0.612492 | 3327.14  | 3271.28 |
| AAEL001701 | serine-type endopeptidase, putative   | 0.587986 | 2.79461  | 1.16936  | 0.839399 | 1.60839  | 3.58443  | 1931.05  | 1861.62 |
| AAEL002360 | serine-type endopeptidase, putative   | 0.574677 | 0.196946 | 0.085618 | 0.195371 | 0.424052 | 0.289248 | 1416.17  | 315.466 |
| AAEL008769 | serine-type endopeptidase, putative   | 4.86315  | 4.93077  | 6.09795  | 6.03783  | 4.72871  | 5.64819  | 520.425  | 629.112 |
| AAEL008782 | serine-type endopeptidase, putative   | 0        | 0        | 0.052272 | 0        | 0.323959 | 0.281406 | 17.1735  | 3.4453  |
| AAEL014188 | serine-type endopeptidase, putative   | 1.52568  | 2.39672  | 21.659   | 8.00597  | 65.9631  | 203.168  | 22510.3  | 6507.16 |
| AAEL011929 | serine-type endopeptidase, putative   | 0.157318 | 0.213959 | 0        | 0        | 0.08263  | 0.568386 | 364.427  | 140.353 |
| AAEL006902 | serine-type endopeptidase, putative   | 0.348888 | 0.475295 | 0.340424 | 0.396655 | 0.682074 | 1.69464  | 2418.77  | 918.026 |
| AAEL003060 | serine-type endopeptidase, putative   | 9.66325  | 12.9423  | 23.9898  | 25.7298  | 343.821  | 1028.19  | 63292.9  | 31369.3 |
| AAEL008780 | serine-type endopeptidase, putative   | 0        | 0        | 0.053808 | 0        | 0.068015 | 0        | 60.0512  | 73.312  |
| AAEL001690 | serine-type endopeptidase, putative   | 1.20844  | 2.52847  | 0.886466 | 0.76429  | 1.48354  | 3.84656  | 5887.58  | 5018.15 |
| AAEL001703 | serine-type endopeptidase, putative   | 2.52066  | 2.847    | 11.5919  | 9.9323   | 164.997  | 315.226  | 16361.2  | 7398.97 |
| AAEL009843 | serine-type endopeptidase, putative   | 0.065149 | 0.388406 | 0.191223 | 0.22106  | 0.597605 | 1.42834  | 1395.91  | 745.446 |
| AAEL006598 | serine-type endopeptidase, putative   | 0        | 0        | 0        | 0        | 0        | 0        | 95.8172  | 18.9193 |
| AAEL008784 | serine-type endopeptidase, putative   | 0.151654 | 0.351016 | 1.50262  | 1.63221  | 3.69486  | 8.31753  | 1042.77  | 435.322 |
| AAEL008567 | serine-type endopeptidase, putative   | 0        | 0.103834 | 0.723914 | 1.59787  | 4.26847  | 7.0456   | 94.255   | 29.6868 |
| AAEL001693 | serine-type endopeptidase, putative   | 1.1227   | 0.986759 | 0.758019 | 0.584029 | 1.02221  | 1.58966  | 5621.47  | 3218.89 |
| AAEL002347 | serine-type endopeptidase, putative   | 0.475438 | 0.401555 | 0.25666  | 0.059295 | 0.488038 | 1.78208  | 2424.52  | 1015.72 |
| AAEL006594 | serine-type endopeptidase, putative   | 0.823603 | 1.04684  | 0.564051 | 0.827877 | 0.984821 | 4.99986  | 6717.48  | 2252.34 |
| AAEL012378 | serine-type protease inhibitor        | 10.2152  | 9.90028  | 25.1541  | 10.5674  | 29.733   | 33.252   | 27.8766  | 17.1581 |
| AAEL005037 | seryl-tRNA synthetase                 | 69.0668  | 85.1923  | 48.2628  | 39.4552  | 78.5691  | 80.1905  | 44.4147  | 57.444  |
| AAEL010414 | set domain protein                    | 30.4885  | 30.6154  | 48.6728  | 41.8587  | 34.3042  | 33.6969  | 2.66023  | 17.1316 |
| AAEL010809 | SET, putative                         | 68.7265  | 65.5659  | 93.7964  | 67.2573  | 63.8294  | 60.1521  | 20.9171  | 43.4905 |
| AAEL011182 | sex-determining protein fem-1         | 33.8152  | 31.928   | 52.5007  | 21.5395  | 29.3559  | 29.1586  | 31.2935  | 32.2077 |
| AAEL000584 | sex-determining region y protein, sry | 31.8848  | 31.6639  | 43.5577  | 43.9794  | 27.929   | 32.2497  | 0.374043 | 14.7014 |
| AAEL008739 | shc transforming protein              | 29.1074  | 28.7119  | 46.2286  | 41.6838  | 21.1633  | 21.7037  | 10.6534  | 18.659  |
| AAEL007578 | shk1 kinase-binding protein           | 16.1815  | 17.9503  | 19.5662  | 17.649   | 21.0744  | 22.7732  | 1.57431  | 8.58221 |
| AAEL008159 | short-chain dehydrogenase             | 2.25045  | 3.74744  | 1.19204  | 1.10789  | 2.76803  | 2.73634  | 664.783  | 261.328 |
| AAEL010290 | short-chain dehydrogenase             | 26.0576  | 23.1767  | 54.9486  | 56.9166  | 20.235   | 21.5996  | 0.707209 | 9.85406 |
| AAEL008152 | short-chain dehydrogenase             | 41.4982  | 37.7982  | 56.1259  | 55.363   | 16.4199  | 18.3837  | 328.521  | 165.152 |
| AAEL009625 | short-chain dehydrogenase             | 9.89981  | 12.4436  | 17.8828  | 17.6609  | 27.3798  | 21.4024  | 226.273  | 116.609 |
| AAEL008016 | short-chain dehydrogenase             | 15.9086  | 19.4148  | 8.66451  | 6.0925   | 11.1435  | 10.1164  | 120.405  | 45.807  |
| AAEL003139 | short-chain dehydrogenase             | 0.796527 | 1.12201  | 2.17216  | 11.5322  | 1.57836  | 2.26992  | 4.92116  | 5.732   |
| AAEL006224 | short-chain dehydrogenase             | 48.7666  | 49.6706  | 63.3718  | 59.6372  | 76.4838  | 70.839   | 233.108  | 131.976 |
| AAEL002493 | short-chain dehydrogenase             | 11.339   | 12.2733  | 14.2619  | 12.052   | 7.82119  | 8.92481  | 6.0559   | 11.6274 |

|            |                                                               |          |         |         |          |          |          |          |         |
|------------|---------------------------------------------------------------|----------|---------|---------|----------|----------|----------|----------|---------|
| AAEL008227 | short-chain dehydrogenase                                     | 23.5122  | 19.2683 | 7.58536 | 9.60257  | 10.8503  | 9.32738  | 3.23419  | 13.4114 |
| AAEL003961 | short-chain dehydrogenase                                     | 18.8704  | 17.7093 | 44.6397 | 42.0551  | 16.2605  | 16.0773  | 0.636785 | 10.1618 |
| AAEL006318 | short-chain dehydrogenase                                     | 0.725497 | 1.161   | 1.03135 | 0.506961 | 0.450162 | 0.734987 | 104.763  | 52.9964 |
| AAEL014526 | sideroflexin 1,2,3                                            | 58.5364  | 76.9284 | 33.9898 | 25.75    | 117.58   | 126.223  | 34.0001  | 66.6592 |
| AAEL009810 | sideroflexin 1,2,3                                            | 36.8142  | 34.8797 | 53.9759 | 59.0201  | 38.2412  | 30.5837  | 25.122   | 31.4964 |
| AAEL004603 | signal peptidase 12kDa subunit, putative                      | 47.0098  | 55.3273 | 18.3096 | 19.4848  | 25.5312  | 27.5704  | 40.2154  | 52.1152 |
| AAEL011989 | signal peptide peptidase                                      | 114.777  | 139.069 | 35.7246 | 42.8314  | 31.9507  | 35.895   | 113.267  | 121.53  |
| AAEL004125 | signal transduction protein lnkalted                          | 36.4978  | 35.6921 | 26.6647 | 29.0806  | 41.864   | 44.9909  | 6.8828   | 19.9731 |
| AAEL007252 | sin3a-associated protein sap130                               | 26.9232  | 27.0666 | 16.8143 | 23.0914  | 12.4792  | 12.2168  | 12.5629  | 19.7175 |
| AAEL000888 | single stranded DNA binding protein                           | 47.8322  | 45.9302 | 74.2576 | 96.2254  | 48.4868  | 49.6828  | 36.5081  | 66.2852 |
| AAEL013286 | single-strand selective monofunctional uracil DNA glycosylase | 22.5567  | 34.4721 | 30.9169 | 26.8153  | 58.0086  | 56.433   | 12.4588  | 18.7484 |
| AAEL000840 | skeletal muscle/kidney enriched inositol 5-phosphatase        | 14.0553  | 13.9821 | 14.8913 | 20.7422  | 26.8037  | 24.9478  | 123.669  | 63.9733 |
| AAEL009160 | skp1                                                          | 182.034  | 188.433 | 283.87  | 254.891  | 174.965  | 180.035  | 262.754  | 183.12  |
| AAEL010651 | skp1                                                          | 1.45205  | 5.8835  | 14.9794 | 20.2551  | 1.47962  | 9.90181  | 0        | 2.9674  |
| AAEL002774 | slender lobes, putative                                       | 13.029   | 10.3037 | 5.75584 | 6.11593  | 10.9652  | 9.13765  | 88.7807  | 38.8297 |
| AAEL012935 | slingshot dual specificity phosphatase                        | 48.3883  | 43.1937 | 58.0378 | 48.6614  | 47.9945  | 49.3789  | 2.5963   | 20.7661 |
| AAEL008719 | Sm protein G, putative                                        | 54.2533  | 58.5234 | 68.4963 | 64.52    | 48.9228  | 52.6294  | 25.2808  | 40.3841 |
| AAEL004589 | small calcium-binding mitochondrial carrier, putative         | 81.788   | 77.2108 | 163.824 | 139.942  | 76.5565  | 63.5289  | 54.4093  | 55.2911 |
| AAEL001382 | small nuclear ribonucleoprotein sm d1                         | 27.8326  | 39.8332 | 34.5522 | 26.7652  | 25.0916  | 25.4754  | 11.8414  | 21.1335 |
| AAEL001363 | small nuclear ribonucleoprotein Sm D1, putative               | 51.1238  | 48.6857 | 45.4442 | 43.2899  | 41.2837  | 53.0967  | 20.7056  | 46.3688 |
| AAEL009914 | small nuclear ribonucleoprotein sm d2                         | 49.1135  | 51.7306 | 60.6396 | 53.5776  | 40.5904  | 44.5977  | 10.9721  | 29.3222 |
| AAEL011433 | small nuclear ribonucleoprotein sm d3                         | 84.6456  | 86.9676 | 112.954 | 98.7108  | 70.1282  | 68.1923  | 44.345   | 63.9932 |
| AAEL003985 | small nuclear ribonucleoprotein, core, putative               | 34.804   | 39.0289 | 38.0103 | 36.5735  | 31.4947  | 33.967   | 17.9537  | 38.4631 |
| AAEL002377 | small nuclear ribonucleoprotein-associated protein            | 64.1095  | 69.1607 | 70.486  | 67.0452  | 51.9454  | 52.7107  | 22.6353  | 40.6974 |
| AAEL003509 | smapl                                                         | 27.7607  | 25.5179 | 29.5742 | 22.9675  | 19.2113  | 20.9261  | 57.1507  | 23.6702 |
| AAEL013510 | smaug protein                                                 | 98.7953  | 95.396  | 198.968 | 139.07   | 70.1156  | 76.1467  | 7.93118  | 54.2253 |
| AAEL006939 | smaug protein                                                 | 38.9884  | 42.3846 | 74.8401 | 53.3698  | 29.1904  | 31.2103  | 3.9346   | 21.3007 |
| AAEL013544 | snail protein, putative                                       | 20.0122  | 20.326  | 27.0728 | 23.222   | 16.8522  | 21.1273  | 0.874141 | 9.5225  |
| AAEL007661 | SOCS                                                          | 10.71    | 8.3663  | 15.1693 | 14.2016  | 7.47631  | 8.57054  | 1.15117  | 5.28237 |

|            |                                                               |          |          |          |          |          |          |         |          |
|------------|---------------------------------------------------------------|----------|----------|----------|----------|----------|----------|---------|----------|
| AAELO11069 | SOCS                                                          | 23.2732  | 24.5358  | 52.9613  | 76.511   | 25.9     | 26.9463  | 6.35823 | 13.4371  |
| AAELO10738 | sodium bicarbonate cotransporter                              | 8.39695  | 9.94101  | 5.86504  | 5.58453  | 9.40194  | 10.606   | 113.412 | 45.2918  |
| AAELO09863 | sodium/dicarboxylate cotransporter, putative                  | 46.32    | 44.8346  | 34.175   | 39.3262  | 50.487   | 46.5519  | 153.598 | 71.8889  |
| AAELO01503 | sodium/hydrogen exchanger 3 (nhe3)                            | 1.74753  | 1.79447  | 3.36002  | 1.92811  | 3.3075   | 4.37398  | 108.744 | 51.4587  |
| AAELO10145 | sodium/potassium-dependent atpase beta-2 subunit              | 58.9061  | 61.1871  | 129.892  | 102.542  | 47.2558  | 54.7187  | 209.007 | 128.45   |
| AAELO03626 | sodium/shloride dependent amino acid transporter              | 4.61557  | 3.69412  | 12.7641  | 2.6362   | 25.7026  | 21.7055  | 1.48571 | 1.69836  |
| AAELO03638 | sodium/shloride dependent amino acid transporter              | 0.676134 | 0.900031 | 1.1769   | 1.7002   | 12.7614  | 2.58538  | 0.43256 | 1.05002  |
| AAELO03624 | sodium/shloride dependent amino acid transporter              | 25.9631  | 19.9357  | 198.8    | 97.4625  | 24.7268  | 25.6631  | 0.52098 | 10.5344  |
| AAELO06995 | sodium/solute symporter                                       | 2.35226  | 0.175501 | 0.619799 | 0.361123 | 0.382176 | 0.920033 | 7.49307 | 0.055218 |
| AAELO06139 | sodium/solute symporter                                       | 34.0407  | 30.8872  | 19.0685  | 26.7928  | 26.0318  | 29.8594  | 138.326 | 73.0751  |
| AAELO01835 | sodium/solute symporter                                       | 1.01246  | 0        | 0.358562 | 0.867818 | 0.335291 | 0.510119 | 5.65887 | 0.3778   |
| AAELO10650 | sodium/solute symporter                                       | 40.2572  | 40.6136  | 17.9633  | 22.4721  | 19.0908  | 19.3805  | 216.003 | 126.226  |
| AAELO02555 | sodium/solute symporter                                       | 3.28189  | 4.65821  | 3.78475  | 1.90599  | 3.37921  | 2.64387  | 1.71626 | 19.5352  |
| AAELO08915 | sodium-and chloride-activated ATP-sensitive potassium channel | 6.35502  | 6.78769  | 5.56494  | 7.10298  | 7.30977  | 7.61172  | 2.06942 | 8.27096  |
| AAELO12440 | sodium-bile acid cotransporter                                | 26.0535  | 25.7354  | 12.1618  | 15.4164  | 23.9629  | 21.6597  | 2737.03 | 1174.3   |
| AAELO12522 | sodium-dependent phosphate transporter                        | 1.16257  | 1.14026  | 1.05824  | 0.537533 | 0.593988 | 0.665364 | 16.1    | 3.52408  |
| AAELO01656 | sodium-dependent phosphate transporter                        | 19.9956  | 17.2022  | 25.6194  | 23.6256  | 13.1061  | 14.9755  | 656.942 | 290.839  |
| AAELO09749 | sodium-dependent phosphate transporter                        | 24.1717  | 22.1204  | 11.1972  | 22.7875  | 32.3605  | 31.8584  | 1.3696  | 12.4414  |
| AAELO05484 | sorting nexin                                                 | 20.0065  | 21.189   | 23.433   | 16.0765  | 21.575   | 21.0295  | 4.30465 | 13.4816  |
| AAELO08020 | sorting nexin                                                 | 22.7891  | 23.9506  | 10.0911  | 14.9012  | 30.7448  | 30.3467  | 17.7378 | 24.4386  |
| AAELO03758 | sorting nexin                                                 | 19.7776  | 20.4548  | 25.518   | 20.8171  | 21.9504  | 19.0245  | 132.929 | 47.8066  |
| AAELO12364 | spermatogenesis associated factor                             | 104.094  | 104.077  | 71.3569  | 75.1242  | 62.1312  | 70.5656  | 176.969 | 87.8812  |
| AAELO00836 | spermatogenesis associated factor                             | 6.18706  | 6.44988  | 3.82819  | 2.9917   | 11.7319  | 13.2599  | 196.982 | 88.871   |
| AAELO10071 | spermidine synthase                                           | 40.2077  | 48.4916  | 37.9795  | 34.331   | 52.7277  | 53.214   | 6.09129 | 30.5125  |
| AAELO01378 | spermine synthase                                             | 34.3123  | 37.8323  | 19.8141  | 20.4805  | 28.6523  | 28.4781  | 7.09981 | 21.9312  |
| AAELO05068 | S-phase kinase-associated protein 2 (skp2), putative          | 16.8032  | 13.8536  | 20.6501  | 21.5541  | 10.341   | 9.32856  | 4.68973 | 10.8566  |
| AAELO13047 | sphingolipid delta 4 desaturase/c-4 hydroxylase protein des2  | 21.683   | 19.5599  | 11.6221  | 13.5544  | 22.4532  | 17.8521  | 251.038 | 88.3586  |

|             |                                                   |          |          |          |          |          |          |          |         |
|-------------|---------------------------------------------------|----------|----------|----------|----------|----------|----------|----------|---------|
| AAELO06381  | sphingomyelin phosphodiesterase                   | 0.109746 | 0.093996 | 0.058758 | 0.045558 | 0.123254 | 0.054028 | 217.19   | 77.6245 |
| AAELO13717  | sphingomyelin phosphodiesterase                   | 0.644242 | 1.56864  | 0.340971 | 0.420382 | 0.63025  | 0.800256 | 2959.98  | 1717.94 |
| AAELO02413  | sphingomyelin phosphodiesterase                   | 20.1913  | 20.9569  | 3.08482  | 3.46539  | 8.7135   | 8.8711   | 2.5763   | 12.7446 |
| AAELO03188  | sphingosine phosphate lyase                       | 15.7623  | 14.3469  | 27.3132  | 23.3273  | 14.8532  | 14.2232  | 228.786  | 117.818 |
| AAELO04710  | spingomyelin synthetase                           | 20.1808  | 19.4704  | 35.9046  | 18.3018  | 14.7948  | 15.7662  | 23.8838  | 12.0572 |
| AAELO02709  | spliceosomal protein sap                          | 42.825   | 48.0298  | 32.8204  | 27.4749  | 44.0442  | 40.7983  | 16.1312  | 34.4524 |
| AAELO13795  | spliceosome associated protein                    | 32.4408  | 29.9325  | 35.1117  | 27.2576  | 39.2404  | 39.4043  | 13.1814  | 20.9581 |
| AAELO02818  | splicing factor u2af large subunit                | 64.6853  | 67.773   | 60.611   | 54.2564  | 50.4669  | 48.3129  | 34.3728  | 50.4778 |
| AAELO03916  | splicing factor, putative                         | 38.2549  | 36.1509  | 42.421   | 40.2886  | 31.0341  | 31.704   | 19.0032  | 28.8806 |
| AAELO04010  | splicing factor, putative                         | 72.8953  | 79.3405  | 70.2411  | 67.3437  | 69.3707  | 66.55    | 65.4798  | 70.1203 |
| AAELO00499  | SPZ1A                                             | 42.8037  | 43.2974  | 53.5505  | 56.1555  | 32.32    | 37.3213  | 0.585263 | 24.9404 |
| AAELO13433  | SPZ1C                                             | 15.6307  | 18.3101  | 8.28646  | 10.6646  | 18.1798  | 15.0233  | 0        | 5.0641  |
| AAELO08507  | srpk                                              | 27.7567  | 29.6933  | 41.6072  | 37.3054  | 37.0395  | 38.1641  | 11.7277  | 18.9698 |
| AAELO07765  | SRPN10                                            | 53.333   | 50.161   | 54.4526  | 54.0977  | 102.03   | 49.8842  | 2580.87  | 948.826 |
| AAELO03686  | SRPN11                                            | 46.8575  | 49.0328  | 66.0103  | 53.7558  | 144.048  | 136.892  | 3.34451  | 22.7916 |
| AAELO05673  | SRPN2                                             | 42.4996  | 45.8273  | 42.961   | 44.4598  | 134.484  | 133.044  | 4.17783  | 20.4761 |
| AAELO14078  | SRPN2                                             | 6.64393  | 7.03336  | 6.34658  | 6.87781  | 19.0399  | 15.7865  | 0.551747 | 4.41461 |
| AAELO02720  | SRPN20                                            | 45.4156  | 52.4514  | 42.3872  | 36.347   | 117.019  | 107.064  | 1.9728   | 16.7124 |
| AAELO05665  | SRPN3                                             | 41.2036  | 44.6428  | 52.6474  | 49.8444  | 71.8973  | 65.6837  | 2.57187  | 19.5905 |
| AAELO13936  | SRPN4                                             | 55.9887  | 56.784   | 69.4773  | 66.3411  | 182.651  | 158.58   | 4.54609  | 22.732  |
| AAELO14141  | SRPN5                                             | 17.3482  | 17.9319  | 16.7084  | 17.6062  | 18.5667  | 14.8692  | 1.47714  | 9.86984 |
| AAELO11777  | SRPN8                                             | 16.9036  | 16.817   | 18.7718  | 17.8016  | 46.2281  | 42.4653  | 1.57357  | 7.46817 |
| AAELO08364  | SRPN9                                             | 76.484   | 76.4856  | 106.074  | 99.4998  | 87.6808  | 75.7459  | 3.87512  | 39.1773 |
| AAELO06748  | ss-DNA binding protein 12RNP2 precursor, putative | 48.7806  | 51.7071  | 42.6736  | 41.1695  | 41.3547  | 46.3301  | 26.6693  | 35.2335 |
| AAELO12840  | stathmin                                          | 60.0534  | 57.2034  | 121.607  | 104.429  | 47.8405  | 51.0835  | 1.93555  | 20.4889 |
| AAELO07470  | staufen                                           | 26.5828  | 27.6226  | 37.737   | 0        | 21.9476  | 22.8279  | 11.8902  | 18.8137 |
| AAELO03645  | stearoyl-coa desaturase                           | 11.5994  | 10.3587  | 11.8893  | 16.2098  | 32.3734  | 17.5062  | 1082.24  | 415.836 |
| AAELO08484  | steroid receptor-interacting snf2 domain protein  | 18.5641  | 16.9773  | 7.10197  | 8.55039  | 24.2895  | 23.1973  | 8.44844  | 14.3323 |
| AAELO15661  | sterol carrier protein-2, putative                | 0.789721 | 1.5287   | 0        | 0.859567 | 1.44988  | 1.31596  | 8645.5   | 4207.62 |
| AAELO02687  | sterol carrier protein-2, putative                | 24.4773  | 22.4429  | 18.0421  | 18.7272  | 20.8982  | 18.4286  | 321.668  | 172.553 |
| AAELO12697  | sterol carrier protein-2, putative                | 0        | 0.171877 | 0.105735 | 0.121974 | 0        | 0        | 634.934  | 242.179 |
| AAELO000135 | sterol desaturase                                 | 0.360982 | 0.803823 | 0.177752 | 0.142737 | 0.657945 | 1.05167  | 523.261  | 310.708 |
| AAELO12425  | sterol desaturase                                 | 2.26547  | 2.51151  | 0.337238 | 5.16782  | 0.845064 | 0.711922 | 7.84386  | 10.9032 |

|            |                                                                           |         |          |          |          |         |         |          |         |
|------------|---------------------------------------------------------------------------|---------|----------|----------|----------|---------|---------|----------|---------|
| AAEL001204 | sterol o-acyltransferase                                                  | 91.8086 | 90.1806  | 121.703  | 73.4847  | 91.4279 | 92.3454 | 118.359  | 89.7339 |
|            | sterol regulatory element binding protein                                 |         |          |          |          |         |         |          |         |
| AAEL000798 | cleavage-activating protein (srebp<br>cleavage-activating protein) (scap) | 24.9064 | 27.4485  | 21.4331  | 23.3805  | 21.0582 | 21.4676 | 5.84111  | 18.445  |
| AAEL013913 | stretch regulated skeletal muscle protein,<br>putative                    | 6.75086 | 1.68203  | 8.91204  | 11.3299  | 29.1442 | 3.49753 | 19.1722  | 6.0039  |
| AAEL003449 | structural maintenance of chromosomes smc2                                | 11.9503 | 11.7019  | 16.8355  | 14.4211  | 12.0849 | 11.6603 | 2.27444  | 7.35904 |
| AAEL010485 | sugar transporter                                                         | 1.44167 | 1.70384  | 0.651223 | 0.614255 | 16.1631 | 21.1263 | 74.2955  | 23.1983 |
| AAEL013489 | sugar transporter                                                         | 5.14293 | 6.01919  | 5.54293  | 3.45575  | 7.81623 | 6.36328 | 0.57463  | 4.9084  |
| AAEL010479 | sugar transporter                                                         | 4.35333 | 4.04363  | 29.9458  | 42.9717  | 30.4349 | 37.4795 | 598.1    | 245.371 |
| AAEL008232 | sugar transporter                                                         | 2.65769 | 1.6248   | 10.2101  | 9.50887  | 4.48435 | 3.02967 | 53.7     | 19.2492 |
| AAEL014207 | sugar transporter                                                         | 7.87056 | 7.7945   | 6.97217  | 7.52748  | 5.40751 | 6.88663 | 1.53134  | 5.80837 |
| AAEL003808 | sugar transporter                                                         | 15.4161 | 13.7484  | 46.159   | 53.7569  | 19.3461 | 19.0567 | 233.1    | 132.635 |
| AAEL007136 | sugar transporter                                                         | 52.2079 | 57.3168  | 32.7057  | 31.2651  | 45.6071 | 44.5906 | 27.3049  | 33.3816 |
| AAEL003899 | sugar transporter                                                         | 9.52912 | 6.82927  | 2.00691  | 2.57462  | 6.00579 | 5.76597 | 163.766  | 79.9014 |
| AAEL012655 | sugar transporter                                                         | 21.734  | 25.3597  | 78.4376  | 40.6446  | 24.7134 | 25.015  | 159.708  | 80.6092 |
| AAEL007126 | sugar transporter                                                         | 6.30649 | 0.231826 | 1.19839  | 0.77702  | 1.61979 | 2.44073 | 13.9365  | 0.52324 |
| AAEL007128 | sugar transporter                                                         | 1.21453 | 0        | 1.66053  | 1.68333  | 1.23468 | 2.08116 | 5.85711  | 0       |
| AAEL012041 | sulfate transporter                                                       | 5.60649 | 3.56679  | 3.77651  | 4.17146  | 4.59375 | 4.66076 | 244.725  | 86.5531 |
| AAEL006344 | sulfotransferase (sult)                                                   | 19.2921 | 24.1603  | 10.7241  | 9.65216  | 14.2751 | 11.2337 | 0.986503 | 8.39003 |
| AAEL006353 | sulfotransferase (sult)                                                   | 10.2142 | 11.1349  | 6.7784   | 11.8433  | 1.98369 | 2.60187 | 163.711  | 88.4089 |
| AAEL015305 | sulfotransferase (sult)                                                   | 16.1013 | 17.1775  | 8.11995  | 4.34524  | 8.01527 | 5.74139 | 3.58381  | 8.64507 |
| AAEL015099 | sumo ligase                                                               | 88.4945 | 90.3609  | 105.618  | 92.8548  | 80.6595 | 83.336  | 35.0359  | 62.0781 |
| AAEL000091 | sumo-1-activating enzyme Ela                                              | 48.409  | 44.5318  | 69.4602  | 68.8979  | 26.271  | 28.3701 | 19.2607  | 30.4754 |
| AAEL000274 | superoxide dismutase                                                      | 57.6633 | 53.9556  | 99.7114  | 72.8836  | 48.8077 | 45.4408 | 95.9439  | 54.1644 |
| AAEL003105 | supervillin                                                               | 28.9669 | 24.3403  | 61.9453  | 61.8294  | 24.1196 | 23.7884 | 98.1785  | 50.2    |
| AAEL013408 | suppressin                                                                | 39.9397 | 38.9604  | 29.9002  | 33.7998  | 52.7501 | 52.8081 | 22.472   | 31.2307 |
| AAEL006566 | suppressor of ty                                                          | 33.7292 | 36.8271  | 46.4025  | 31.3117  | 41.4191 | 54.734  | 34.603   | 32.7428 |
| AAEL008235 | surfeit locus protein                                                     | 9.31414 | 5.07674  | 8.05138  | 6.62419  | 9.8508  | 10.8588 | 25.6147  | 7.71438 |
|            | SWI/SNF related matrix associated actin                                   |         |          |          |          |         |         |          |         |
| AAEL004371 | dependent regulator of chromatin subfamily<br>B member 1                  | 29.162  | 27.5789  | 27.5577  | 26.1182  | 26.8307 | 27.6748 | 11.4164  | 19.8262 |
| AAEL007315 | symbol, putative                                                          | 21.5056 | 23.8317  | 7.65736  | 7.6196   | 7.77862 | 8.94628 | 4.75411  | 15.8053 |
| AAEL002437 | symplekin                                                                 | 18.7777 | 17.3093  | 19.6909  | 21.2949  | 16.8079 | 15.8621 | 7.21311  | 13.4407 |
| AAEL012098 | synaptic vesicle protein                                                  | 19.5198 | 20.0234  | 26.6925  | 31.2942  | 10.9179 | 12.2243 | 0.387544 | 10.7675 |



|            |                                             |          |          |          |         |          |          |          |          |
|------------|---------------------------------------------|----------|----------|----------|---------|----------|----------|----------|----------|
| AAEL005849 | synaptic vesicle protein                    | 20.2466  | 1.37436  | 31.3927  | 57.5473 | 13.7669  | 39.5152  | 54.0707  | 1.99738  |
| AAEL005533 | synaptic vesicle protein                    | 2.61584  | 0.300176 | 0.131366 | 0.05067 | 0.257424 | 0.3724   | 7.34023  | 0.731917 |
| AAEL015283 | synaptic vesicle protein                    | 0.362178 | 0        | 0.314333 | 0.1523  | 0.589046 | 0.784903 | 83.8672  | 39.2893  |
| AAEL013884 | synaptic vesicle protein                    | 20.3573  | 15.518   | 2.90162  | 2.87867 | 7.0001   | 6.51319  | 64.4606  | 30.391   |
| AAEL013571 | synaptobrevin                               | 77.444   | 75.3326  | 67.8216  | 57.9884 | 86.8892  | 83.5656  | 428.146  | 194.223  |
| AAEL005479 | synaptogyrin, putative                      | 10.6021  | 10.3099  | 12.7959  | 12.2302 | 12.0245  | 14.0313  | 0.349072 | 7.08072  |
| AAEL009169 | synaptotagmin, putative                     | 21.848   | 19.1407  | 18.234   | 16.9768 | 27.9826  | 28.616   | 130.047  | 62.3128  |
| AAEL007282 | syntaxin binding protein-1,2,3              | 24.9884  | 21.9548  | 28.0078  | 25.6617 | 18.2888  | 18.8992  | 117.684  | 58.5906  |
| AAEL005391 | syntenin                                    | 51.4411  | 53.7764  | 59.8112  | 56.3994 | 51.3783  | 50.2656  | 232.831  | 120.286  |
| AAEL014209 | tangerin                                    | 6.96909  | 17.9556  | 9.50677  | 9.52847 | 10.6648  | 5.35406  | 27.253   | 8.74815  |
| AAEL005276 | target of myb1 (tom1)                       | 14.2809  | 14.3443  | 9.62668  | 9.62994 | 15.1869  | 12.1335  | 146.287  | 67.5687  |
| AAEL010341 | TATA-binding protein, putative              | 35.0707  | 40.2699  | 48.2837  | 43.7726 | 38.5104  | 38.8132  | 10.3772  | 19.6254  |
| AAEL013653 | tata-box binding protein                    | 47.5162  | 51.6451  | 54.5234  | 52.0862 | 52.8983  | 53.2598  | 11.2119  | 27.8986  |
| AAEL000661 | t-cell specific transcription factor, tcf   | 12.4402  | 14.3046  | 17.4427  | 15.9585 | 9.05274  | 10.8579  | 0.402481 | 7.3822   |
| AAEL003872 | Tctp                                        | 659.165  | 701.631  | 416.891  | 343.842 | 2535.46  | 2385.58  | 1073.35  | 793.077  |
| AAEL000428 | Tdo                                         | 11.4114  | 13.2723  | 6.25428  | 10.6761 | 44.3346  | 35.1923  | 330.98   | 135.725  |
| AAEL000087 | TEP22                                       | 19.9072  | 27.4194  | 7.91387  | 9.24408 | 16.2656  | 18.8046  | 1.11661  | 9.34807  |
| AAEL008607 | tep3                                        | 18.4613  | 16.9573  | 22.3535  | 17.2962 | 90.4102  | 63.3978  | 7.84752  | 5.93337  |
| AAEL002250 | terminal deoxycytidyl transferase rev1      | 10.749   | 9.25992  | 15.9367  | 15.3568 | 5.26587  | 5.5754   | 0.802971 | 5.08752  |
| AAEL014017 | testis-specific serine/threonine kinase 22c | 12.4475  | 12.6979  | 12.841   | 13.3642 | 10.3975  | 11.429   | 0        | 7.77254  |
| AAEL003210 | tetraspanin 29fa                            | 107.013  | 117.582  | 91.2698  | 99.1308 | 106.021  | 110.053  | 454.434  | 250.779  |
| AAEL012532 | tetraspanin 29fb                            | 1.91024  | 0.366334 | 1.13081  | 1.2137  | 4.60214  | 3.9224   | 1147.7   | 564.461  |
| AAEL005536 | tetraspanin 29fb                            | 1.1668   | 0.558015 | 1.47587  | 1.3141  | 8.11     | 8.54956  | 1086.3   | 415.918  |
| AAEL012528 | tetraspanin, putative                       | 0.673131 | 0        | 0.38379  | 0.06377 | 0.809185 | 1.16901  | 38.9045  | 15.5343  |
| AAEL005137 | tetraspanin, putative                       | 19.0852  | 17.4591  | 53.8197  | 45.657  | 20.1951  | 23.0424  | 1.1868   | 10.9346  |
| AAEL005545 | tetraspanin, putative                       | 0.71243  | 0        | 0.103207 | 0.1195  | 1.5488   | 0.698958 | 29.1633  | 11.0463  |
| AAEL010967 | tetraspanin, putative                       | 16.2564  | 14.8103  | 23.2952  | 37.9931 | 10.0052  | 11.0308  | 1.96273  | 8.30675  |
| AAEL013875 | tetraspanin, putative                       | 107.298  | 104.398  | 101.821  | 103.387 | 213.348  | 221.058  | 1419.13  | 542.926  |
| AAEL010102 | tetraspanin, putative                       | 5.92796  | 7.24745  | 4.18138  | 4.04291 | 8.2398   | 11.5506  | 0.959791 | 5.59068  |
| AAEL008743 | Tetratricopeptide repeat protein, putative  | 5.09344  | 5.45438  | 7.4055   | 5.90456 | 10.9662  | 10.5344  | 1.6829   | 5.86163  |
| AAEL006462 | TFIID subunit TAFII55, putative             | 19.8367  | 18.9095  | 24.0612  | 20.1082 | 20.6511  | 20.823   | 7.19677  | 13.0825  |
| AAEL013218 | thiamine transporter                        | 0.200581 | 0.142669 | 53.6818  | 35.3708 | 0.107917 | 0.273745 | 0        | 0.271003 |
| AAEL010777 | thioredoxin (TRX), putative                 | 363.448  | 341.839  | 480.422  | 405.463 | 310.394  | 334.2    | 663.037  | 371.554  |
| AAEL009708 | thioredoxin M, putative                     | 24.6724  | 27.7191  | 25.1468  | 22.7764 | 23.3016  | 22.3897  | 122.128  | 62.9363  |

|             |                                                    |         |         |          |          |         |         |          |         |
|-------------|----------------------------------------------------|---------|---------|----------|----------|---------|---------|----------|---------|
| AAELO02886  | thioredoxin reductase                              | 142.284 | 146.741 | 117.641  | 117.837  | 139.098 | 142.242 | 483.769  | 236.531 |
| AAELO00435  | THO complex, putative                              | 15.8525 | 15.1904 | 14.7076  | 15.4204  | 13.6094 | 14.0038 | 5.72411  | 11.8797 |
| AAELO00049  | three prime repair exonuclease 1, putative         | 17.9356 | 21.7742 | 3.30137  | 2.41052  | 9.65681 | 7.36327 | 171.168  | 75.3182 |
| AAELO03443  | threonine dehydrogenase                            | 16.2994 | 26.8493 | 1.15195  | 0.551075 | 51.18   | 57.8421 | 0.963277 | 18.062  |
| AAELO14055  | thymidine kinase                                   | 71.8416 | 70.1648 | 96.3027  | 96.5843  | 46.3369 | 38.6684 | 53.4258  | 68.1728 |
| AAELO01246  | Thymidylate kinase, putative                       | 47.893  | 34.8269 | 90.9882  | 73.0773  | 12.5005 | 12.9439 | 6.81305  | 41.3298 |
| AAELO11653  | thyroid hormone receptor interactor                | 51.6506 | 46.2962 | 57.0709  | 65.4661  | 21.7707 | 22.2738 | 1.86347  | 25.6707 |
| AAELO06411  | TIM                                                | 11.14   | 10.4063 | 5.80156  | 4.11205  | 20.9354 | 17.4771 | 91.2574  | 43.5688 |
| AAELO10450  | TIM10                                              | 147.911 | 71.3273 | 196.978  | 161.742  | 183.297 | 174.568 | 101.934  | 82.923  |
| AAELO009518 | timeout/timeless-2                                 | 16.9725 | 17.6028 | 20.9687  | 24.2732  | 18.0629 | 17.4874 | 3.39894  | 9.84247 |
| AAELO13525  | Timp-3, putative                                   | 245.337 | 154.204 | 11.1751  | 15.5837  | 25.8395 | 23.8652 | 56.9302  | 82.3301 |
| AAELO14072  | tip60                                              | 17.1836 | 16.2506 | 17.3536  | 15.615   | 19.0453 | 20.1558 | 3.02002  | 9.20408 |
| AAELO00967  | tmc7 protein                                       | 8.60999 | 9.63266 | 8.78413  | 10.1335  | 8.60919 | 8.6115  | 52.9143  | 22.9938 |
| AAELO17403  | TMOF                                               | 14894.6 | 10702.9 | 11.6904  | 1347.84  | 1.51613 | 1.67406 | 110.266  | 8572.03 |
| AAELO06649  | tnf receptor associated factor                     | 14.6344 | 12.7204 | 0.631409 | 0.2495   | 1.83006 | 1.38775 | 3.45745  | 8.31495 |
| AAELO01771  | toll                                               | 4.46405 | 4.9024  | 0.788625 | 1.60468  | 2.72448 | 2.92502 | 0.353739 | 3.93658 |
| AAELO13441  | TOLL9A                                             | 1.97802 | 1.44199 | 0.764569 | 1.20404  | 2.17955 | 1.08355 | 141.476  | 57.0731 |
| AAELO11734  | TOLL9B                                             | 6.40549 | 5.31182 | 12.3813  | 9.80417  | 2.50739 | 2.34013 | 159.882  | 73.1356 |
| AAELO04112  | TPX2                                               | 1025.42 | 912.16  | 1824.5   | 1617.74  | 419.561 | 405.576 | 676.161  | 638.276 |
| AAELO02309  | TPX4                                               | 12.2847 | 16.8804 | 48.093   | 56.3703  | 45.3366 | 19.3679 | 1149.41  | 375.587 |
| AAELO03912  | trafficking protein particle complex subunit 6b    | 25.6942 | 26.9818 | 31.2105  | 26.5995  | 30.9746 | 39.3125 | 17.2494  | 29.9102 |
| AAELO09389  | transaldolase                                      | 137.744 | 138.554 | 178.893  | 152.046  | 107.791 | 107.698 | 104.633  | 112.422 |
| AAELO01496  | transcription elongation factor s-ii               | 77.1902 | 68.9999 | 76.0823  | 73.8544  | 59.3824 | 57.7053 | 28.1831  | 49.1281 |
| AAELO01321  | Transcription factor dp                            | 42.935  | 38.9263 | 42.4816  | 48.3897  | 38.1037 | 37.9239 | 14.8613  | 25.6158 |
| AAELO13151  | transcription factor IIB, putative                 | 28.0501 | 30.9446 | 41.5498  | 38.3026  | 26.8067 | 28.671  | 4.90224  | 15.1898 |
| AAELO009798 | transcription factor IIIA, putative                | 17.7959 | 21.1065 | 36.3135  | 29.1291  | 13.7455 | 13.9463 | 5.04319  | 18.9818 |
| AAELO11858  | transcription factor IIIA, putative                | 7.03652 | 6.72734 | 8.96014  | 7.5873   | 10.7767 | 10.1305 | 1.7908   | 6.22059 |
| AAELO005975 | transcription initiation factor                    | 54.4169 | 54.9402 | 75.2219  | 68.3375  | 37.1618 | 37.1695 | 14.9593  | 34.6981 |
| AAELO12202  | transcription initiation factor IIE, alpha subunit | 15.0585 | 15.7577 | 22.9074  | 19.0132  | 12.9082 | 12.8957 | 4.42643  | 10.4105 |
| AAELO12265  | transcription initiation factor RRN3               | 63.1688 | 66.5663 | 41.1268  | 45.2174  | 88.1092 | 68.3982 | 11.297   | 36.3334 |
| AAELO15458  | transferrin                                        | 121.788 | 141.191 | 18.4925  | 94.6397  | 159.421 | 167.22  | 8.49976  | 29.7798 |
| AAELO15639  | transferrin                                        | 72.9878 | 80.4789 | 7.34868  | 15.3261  | 76.7894 | 75.854  | 5.00444  | 19.5414 |
| AAELO11641  | transferrin                                        | 1.18615 | 0.60216 | 0.787966 | 0.600374 | 12.2625 | 7.14767 | 1018.71  | 342.49  |

|            |                                                                                                           |          |          |          |          |          |          |          |         |
|------------|-----------------------------------------------------------------------------------------------------------|----------|----------|----------|----------|----------|----------|----------|---------|
| AAEL004434 | transketolase                                                                                             | 291.652  | 323.038  | 424.795  | 434.486  | 299.455  | 291.484  | 208.882  | 226.152 |
| AAEL003661 | translation initiation factor                                                                             | 82.2104  | 94.2871  | 107.231  | 88.359   | 189.387  | 190.754  | 43.9102  | 59.9197 |
| AAEL013828 | translation initiation factor eif-2b                                                                      | 9.86336  | 11.5601  | 9.67397  | 7.20034  | 13.051   | 15.4517  | 48.1433  | 20.2146 |
| AAEL003285 | translocation associated membrane protein                                                                 | 146.127  | 191.098  | 36.6723  | 30.2769  | 51.6814  | 58.9917  | 357.226  | 295.12  |
| AAEL010032 | translocon-associated protein, beta subunit precursor (trap-beta) (signal sequence receptor beta subunit) | 321.9    | 461.037  | 121.401  | 111.887  | 160.381  | 160.75   | 256.478  | 317.453 |
| AAEL013320 | translocon-associated protein, delta subunit                                                              | 261.002  | 347.299  | 79.783   | 79.1061  | 85.3625  | 87.5771  | 257.622  | 258.983 |
| AAEL007441 | translocon-associated protein, gamma subunit                                                              | 267.042  | 389.475  | 72.9298  | 65.2034  | 93.1449  | 99.7372  | 266.021  | 335.496 |
| AAEL009995 | transmembrane protein, putative                                                                           | 67.2529  | 64.1845  | 43.2893  | 38.0644  | 39.5101  | 45.2428  | 33.8881  | 47.0583 |
| AAEL003573 | transportin                                                                                               | 42.1497  | 45.2815  | 22.2008  | 24.1477  | 41.0368  | 41.9188  | 20.8029  | 31.0883 |
| AAEL002287 | trans-prenyltransferase                                                                                   | 14.7717  | 14.1918  | 13.5198  | 32.7483  | 19.3722  | 17.3101  | 8.20089  | 9.80252 |
| AAEL006446 | trehalose-6-phosphate synthase                                                                            | 78.2962  | 82.5113  | 63.0133  | 121.242  | 148.348  | 150.224  | 17.4936  | 29.0995 |
| AAEL000567 | Tret1                                                                                                     | 44.6442  | 66.1458  | 99.6711  | 148.303  | 211.246  | 222.522  | 22.8064  | 19.443  |
| AAEL014551 | triacylglycerol lipase, pancreatic                                                                        | 43.501   | 49.2549  | 3.07633  | 2.83939  | 11.1029  | 10.8213  | 2.40803  | 22.4855 |
| AAEL014553 | triacylglycerol lipase, pancreatic                                                                        | 2.3948   | 3.12788  | 13.6699  | 10.8148  | 3.01856  | 2.22434  | 0.155101 | 7.17893 |
| AAEL005991 | tricarboxylate transport protein                                                                          | 80.7359  | 86.5481  | 76.4989  | 71.3026  | 136.841  | 137.266  | 87.8766  | 89.619  |
| AAEL002542 | triosephosphate isomerase                                                                                 | 359.977  | 361.791  | 522.369  | 463.658  | 121.821  | 121.279  | 343.9    | 264.593 |
| AAEL011745 | Trisn small nuclear ribonucleoprotein, putative                                                           | 15.8775  | 16.1486  | 14.7274  | 15.294   | 7.49202  | 7.34204  | 5.12354  | 11.514  |
| AAEL009156 | trna (guanine-n(7)-)-methyltransferase                                                                    | 18.7792  | 20.4571  | 13.3056  | 14.8052  | 20.861   | 22.4558  | 6.93814  | 12.6584 |
| AAEL003071 | tRNA pseudouridine synthase D                                                                             | 30.1523  | 36.0985  | 17.9461  | 13.7542  | 103.232  | 93.0541  | 10.52    | 22.7432 |
| AAEL016671 | tRNA-Ala                                                                                                  | 22.6677  | 8.02336  | 13.1972  | 21.6695  | 0        | 3.92116  | 43.1555  | 13.8081 |
| AAEL001171 | tRNA-dihydrouridine synthase                                                                              | 15.1147  | 16.5448  | 13.9886  | 12.523   | 41.1871  | 38.6356  | 4.98609  | 11.1845 |
| AAEL016814 | tRNA-His                                                                                                  | 36.7912  | 42.9547  | 65.1874  | 56.2161  | 45.4083  | 47.8578  | 6.42869  | 16.4572 |
| AAEL007029 | tropomodulin                                                                                              | 21.8217  | 21.2237  | 55.0933  | 36.1415  | 16.4656  | 15.3342  | 120.721  | 66.6629 |
| AAEL013703 | trypsin                                                                                                   | 0        | 0        | 3.20943  | 3.31584  | 19.8349  | 17.6631  | 0        | 88.2007 |
| AAEL013715 | trypsin                                                                                                   | 0.143033 | 0.910218 | 0.154925 | 0.357481 | 0.584241 | 2.54228  | 0        | 1704.94 |
| AAEL010196 | trypsin                                                                                                   | 2.30674  | 4.19875  | 1.37661  | 1.37358  | 1.4024   | 4.33416  | 17806    | 8779.25 |
| AAEL008085 | trypsin                                                                                                   | 0.504785 | 0.582922 | 1.07427  | 2.33645  | 7.42601  | 7.07983  | 3875.96  | 1597.48 |
| AAEL010195 | trypsin                                                                                                   | 0.355082 | 0        | 0        | 0.368776 | 0.161068 | 0.176152 | 696.602  | 266.7   |
| AAEL013623 | trypsin                                                                                                   | 0.08631  | 0.495938 | 1.6214   | 0.881309 | 4.17182  | 10.3503  | 1096.96  | 562.736 |
| AAEL013707 | trypsin                                                                                                   | 0.322072 | 0.553116 | 0.174497 | 0.067768 | 1.02101  | 2.94639  | 0        | 1066.95 |

|            |                                                   |          |          |          |          |          |          |          |         |
|------------|---------------------------------------------------|----------|----------|----------|----------|----------|----------|----------|---------|
| AAELO13713 | trypsin                                           | 5.76708  | 12.6375  | 3.77006  | 4.19893  | 2.72285  | 3.26327  | 0        | 22930.5 |
| AAELO06425 | trypsin                                           | 1.46023  | 1.06787  | 5.41523  | 3.90067  | 28.2279  | 50.7602  | 2707.07  | 1240.36 |
| AAELO13712 | trypsin                                           | 4.0789   | 9.11699  | 2.41374  | 2.48384  | 2.87362  | 3.22734  | 0        | 15001.7 |
| AAELO07601 | trypsin                                           | 0        | 0        | 0.049531 | 0        | 0        | 0.205295 | 236.152  | 217.822 |
| AAELO10202 | trypsin                                           | 0.730288 | 1.88981  | 0.346838 | 0.706844 | 0.43584  | 0.776664 | 8464.44  | 4708.23 |
| AAELO07818 | trypsin                                           | 0.598704 | 1.03844  | 25.159   | 28.9581  | 806.878  | 1856.55  | 2194.61  | 1484.11 |
| AAELO08093 | trypsin                                           | 0.202416 | 0.570643 | 0.417135 | 0.962202 | 3.77817  | 3.18265  | 1781.45  | 749.114 |
| AAELO12852 | trypsin                                           | 1.07288  | 0.648667 | 0.100251 | 0.058749 | 0.832815 | 0.421474 | 342.899  | 147.512 |
| AAELO06903 | trypsin                                           | 0        | 0.202985 | 0.251217 | 0.144234 | 0        | 0        | 1371.29  | 558.189 |
| AAELO06121 | Trypsin, putative                                 | 17.6879  | 16.7097  | 18.2658  | 20.8345  | 22.529   | 27.1024  | 0.688476 | 9.86687 |
| AAELO13714 | trypsin, putative                                 | 9.60776  | 16.0204  | 5.32964  | 8.58474  | 8.53029  | 12.6547  | 0        | 41018.2 |
| AAELO15528 | Trypsin, putative                                 | 0        | 0        | 0        | 0        | 0        | 0        | 39.506   | 5.22161 |
| AAELO15104 | Trypsin, putative                                 | 0        | 0        | 0        | 0        | 0.141327 | 0.076719 | 10.9723  | 2.13964 |
| AAELO06123 | Trypsin, putative                                 | 11.2496  | 13.527   | 28.5486  | 23.5881  | 16.657   | 17.0331  | 0.249067 | 6.43772 |
| AAELO06378 | trypsin, putative                                 | 0        | 0        | 0        | 0        | 0        | 0        | 9.88522  | 1.41965 |
| AAELO06384 | Trypsin, putative                                 | 0        | 0        | 0        | 0        | 0        | 0        | 37.2052  | 8.74427 |
| AAELO13629 | trypsin-alpha, putative                           | 0.0444   | 0.364145 | 0.391268 | 0.304633 | 4.04393  | 3.42729  | 583.673  | 244.702 |
| AAELO08079 | trypsin-alpha, putative                           | 0.519259 | 0.17422  | 0.21492  | 0.156182 | 3.66016  | 1.71715  | 567.197  | 204.52  |
| AAELO06368 | trypsin-beta, putative                            | 0        | 0        | 0        | 0        | 0        | 0        | 15.7254  | 2.01389 |
| AAELO08080 | trypsin-eta, putative                             | 4.25989  | 2.96547  | 2.28153  | 2.4075   | 21.6952  | 28.3333  | 472.894  | 183.012 |
| AAELO08097 | trypsin-eta, putative                             | 4.77716  | 6.41805  | 1.57951  | 1.53128  | 7.54535  | 5.91044  | 454.568  | 175.224 |
| AAELO06179 | tubulin alpha chain                               | 7.64198  | 5.83242  | 9.00915  | 9.33737  | 2.06887  | 1.17328  | 1.23503  | 5.71464 |
| AAELO06642 | tubulin alpha chain                               | 903.46   | 797.877  | 1330.56  | 1093.77  | 380.404  | 394.092  | 1048.8   | 875.655 |
| AAELO04172 | tubulin alpha chain                               | 70.4916  | 68.0643  | 105.199  | 122.157  | 35.8332  | 39.2082  | 1.44186  | 33.6338 |
| AAELO02851 | tubulin beta chain                                | 764.125  | 724.505  | 1060.47  | 934.633  | 477.911  | 446.508  | 543.2    | 542.988 |
| AAELO05084 | tubulin beta chain                                | 39.606   | 40.3843  | 21.0517  | 15.5588  | 38.7183  | 42.2111  | 16.4157  | 32.2882 |
| AAELO05052 | tubulin beta chain                                | 2.10748  | 2.76663  | 3.90876  | 2.72427  | 28.4794  | 21.4868  | 79.4373  | 33.9488 |
| AAELO02848 | tubulin beta chain                                | 52.863   | 49.4375  | 3.70432  | 3.06938  | 6.88388  | 7.8642   | 253.354  | 72.6905 |
| AAELO04440 | tubulin-specific chaperone e                      | 9.88373  | 8.64112  | 18.6106  | 21.131   | 8.86757  | 9.18862  | 74.7775  | 36.0014 |
| AAELO14247 | type i inositol-1,4,5-trisphosphate 5-phosphatase | 17.138   | 15.055   | 9.13766  | 12.2568  | 14.4661  | 12.4862  | 0.872245 | 8.97505 |
| AAELO08963 | tyrosine aminotransferase                         | 51.9278  | 63.4627  | 16.5358  | 15.2732  | 44.445   | 32.9396  | 0.748307 | 25.9454 |
| AAELO07971 | tyrosine transporter                              | 31.446   | 26.4114  | 40.3515  | 43.6636  | 28.3761  | 29.2624  | 1.51532  | 19.9485 |
| AAELO17826 | U1                                                | 10.7718  | 37.9981  | 55.6523  | 36.3592  | 60.3519  | 33.8703  | 33.0355  | 33.1627 |
| AAELO17860 | U1                                                | 10.8578  | 4.13046  | 12.8151  | 2.89031  | 3.4431   | 7.40753  | 0        | 0       |

|            |                                                                                      |         |         |         |         |         |         |          |         |
|------------|--------------------------------------------------------------------------------------|---------|---------|---------|---------|---------|---------|----------|---------|
| AAELO17607 | U1                                                                                   | 0       | 7.56105 | 0       | 0       | 0       | 3.35223 | 0        | 0       |
| AAELO17799 | U1                                                                                   | 7.19551 | 8.19372 | 5.10634 | 17.2781 | 0       | 55.1209 | 0        | 32.999  |
| AAELO14167 | U1 small nuclear ribonucleoprotein A                                                 | 19.25   | 21.2718 | 28.2674 | 26.7068 | 23.4831 | 23.8441 | 5.2429   | 13.4714 |
| AAELO17631 | U2                                                                                   | 0       | 1.91077 | 1.24256 | 0       | 0       | 0       | 0        | 5.81772 |
| AAELO12656 | U2 small nuclear ribonucleoprotein a                                                 | 12.5286 | 9.2132  | 10.6035 | 11.0238 | 7.28106 | 8.65251 | 4.25664  | 11.5872 |
| AAELO06713 | U2 snrnp auxiliary factor, small subunit                                             | 88.3743 | 99.07   | 120.954 | 122.053 | 66.8433 | 60.1099 | 49.8759  | 63.5911 |
| AAELO17659 | U3                                                                                   | 8.00391 | 5.44501 | 9.35129 | 19.9817 | 8.88804 | 11.1108 | 7.03534  | 16.1947 |
| AAELO05263 | U3 small nucleolar ribonucleoprotein protein IMP3 (U3 snoRNP protein IMP3), putative | 29.2754 | 30.3043 | 35.0767 | 33.297  | 37.9093 | 40.4449 | 12.3978  | 22.6446 |
| AAELO06063 | U3 small nucleolar ribonucleoprotein protein imp4                                    | 27.6563 | 28.8898 | 31.9082 | 26.7843 | 38.547  | 41.3828 | 5.73952  | 19.1609 |
| AAELO04997 | U3 small nucleolar ribonucleoprotein protein imp4                                    | 39.0026 | 42.5809 | 53.3388 | 46.4576 | 77.6261 | 77.9712 | 9.17393  | 25.1168 |
| AAELO00422 | U3 small nucleolar RNA-associated protein, putative                                  | 23.2349 | 22.5254 | 25.9908 | 20.4722 | 46.3814 | 48.3969 | 4.0631   | 12.1827 |
| AAELO17678 | U4                                                                                   | 0       | 0       | 0       | 0       | 0       | 19.0143 | 0        | 0       |
| AAELO17674 | U5                                                                                   | 156.598 | 116.144 | 173.687 | 120.892 | 377.15  | 410.402 | 139.187  | 278.203 |
| AAELO17888 | U5                                                                                   | 0       | 0       | 77.6394 | 66.3027 | 125.665 | 185.379 | 64.2809  | 97.9397 |
| AAELO17805 | U5                                                                                   | 0       | 0       | 58.2295 | 0       | 0       | 26.4827 | 0        | 0       |
| AAELO11187 | U520                                                                                 | 118.384 | 107.343 | 128.587 | 122.987 | 125.007 | 125.379 | 16.8383  | 54.1904 |
| AAELO00766 | ubiquinol cytochrome C oxidoreductase-subunit 6.4kD-subunit, putative                | 186.472 | 295.594 | 172.633 | 196.763 | 357.569 | 366.067 | 690.3    | 572.666 |
| AAELO07868 | ubiquinol-cytochrome c reductase complex 14 kd protein                               | 125.862 | 135.563 | 125.73  | 102.551 | 155.55  | 149.875 | 278.865  | 215.187 |
| AAELO00178 | ubiquinone/menaquinone biosynthesis methyltransferase                                | 30.2815 | 32.3406 | 38.0779 | 36.8392 | 28.4887 | 27.8816 | 13.2033  | 22.0296 |
| AAELO00795 | ubiquitin                                                                            | 836.537 | 799.148 | 1067.72 | 1082.93 | 860.449 | 867.136 | 848.497  | 845.5   |
| AAELO03877 | ubiquitin                                                                            | 74.3399 | 65.5094 | 57.201  | 57.8971 | 93.1308 | 71.0859 | 734.725  | 335.873 |
| AAELO12112 | ubiquitin conjugating enzyme 7 interacting protein                                   | 8.23843 | 6.98222 | 6.43783 | 7.72873 | 6.15675 | 6.06021 | 0.224931 | 4.78193 |
| AAELO10583 | ubiquitin conjugating enzyme 7 interacting protein                                   | 20.0023 | 19.8987 | 26.1341 | 23.6347 | 17.8201 | 19.0955 | 0.2999   | 12.2737 |
| AAELO12599 | ubiquitin ligase E3                                                                  | 38.4857 | 39.5073 | 22.0205 | 24.0953 | 36.7082 | 35.0485 | 12.3291  | 26.0498 |
| AAELO12603 | ubiquitin ligase E3                                                                  | 22.5327 | 23.8389 | 14.6533 | 15.3382 | 19.1658 | 19.5281 | 5.8357   | 13.1853 |

|            |                                                                                 |         |         |         |         |         |         |         |         |
|------------|---------------------------------------------------------------------------------|---------|---------|---------|---------|---------|---------|---------|---------|
| AAEL011287 | ubiquitin specific protease                                                     | 55.0913 | 58.0085 | 60.5647 | 52.4211 | 61.5653 | 61.4141 | 4.9231  | 26.0592 |
| AAEL005038 | ubiquitin-conjugating enzyme E2                                                 | 134.653 | 125.74  | 200.724 | 164.52  | 87.0011 | 96.3687 | 96.4491 | 104.631 |
| AAEL010798 | ubiquitin-conjugating enzyme E2 g                                               | 172.462 | 180.219 | 201.654 | 175.383 | 116.89  | 120.748 | 78.7809 | 135.273 |
| AAEL009770 | ubiquitin-conjugating enzyme E2 i                                               | 139.236 | 138.489 | 210.327 | 182.335 | 126.42  | 115.974 | 134.269 | 114.34  |
| AAEL006073 | ubiquitin-conjugating enzyme E2-230k                                            | 41.1353 | 42.7289 | 43.2773 | 37.8018 | 34.3671 | 37.1789 | 7.79758 | 20.6278 |
| AAEL008837 | ubiquitin-conjugating enzyme E2r                                                | 48.8138 | 49.8974 | 74.7223 | 63.7545 | 58.7843 | 60.9584 | 21.2751 | 31.1672 |
| AAEL005968 | Ubiquitin-fold modifier-conjugating enzyme 1                                    | 49.6551 | 52.7927 | 28.257  | 28.257  | 33.4731 | 36.3292 | 54.5668 | 58.529  |
| AAEL013363 | ubiquitously transcribed sex (x/y) chromosome tetratricopeptide repeat protein  | 17.1097 | 15.9388 | 8.51507 | 9.50737 | 9.44095 | 9.64861 | 6.9619  | 13.4675 |
| AAEL008656 | UDP-galactose transporter                                                       | 61.4911 | 90.1075 | 20.5499 | 23.6091 | 34.8588 | 37.6807 | 60.2493 | 68.201  |
| AAEL011242 | UDP-glucose 6-dehydrogenase                                                     | 18.8716 | 21.7526 | 20.2749 | 21.3243 | 26.4219 | 24.2702 | 62.0713 | 26.7562 |
| AAEL005903 | UDP-glucuronosyltransferase, putative                                           | 6.9033  | 3.78271 | 11.1336 | 24.2181 | 9.1019  | 8.79628 | 27.0354 | 17.658  |
| AAEL001896 | UDP-N-acetylglucosamine: polypeptide-N-acetylglucosaminyl transferase, putative | 94.4893 | 90.5842 | 154.156 | 127.196 | 120.269 | 115.304 | 73.8706 | 77.7329 |
| AAEL015238 | UPF0729 protein                                                                 | 38.8415 | 35.8629 | 36.3217 | 40.0004 | 65.2413 | 65.3408 | 185.616 | 96.4281 |
| AAEL012973 | uracil phosphoribosyltransferase                                                | 17.5172 | 19.6497 | 25.1111 | 21.8484 | 21.2922 | 19.6337 | 7.53658 | 13.2888 |
| AAEL009099 | uridine cytidine kinase i                                                       | 25.3985 | 26.584  | 20.2504 | 17.1868 | 21.1537 | 22.2724 | 13.1567 | 25.5086 |
| AAEL000395 | USP                                                                             | 39.1233 | 39.829  | 39.7505 | 38.8261 | 46.5762 | 45.059  | 17.9059 | 27.8487 |
| AAEL005617 | utp-glucose-1-phosphate uridylyltransferase 2                                   | 61.87   | 58.9966 | 145.534 | 169.036 | 88.1972 | 81.6403 | 41.537  | 49.203  |
| AAEL008309 | V-1 protein, putative                                                           | 34.2    | 53.3189 | 56.188  | 35.5205 | 94.4846 | 82.5833 | 52.8742 | 56.231  |
| AAEL000291 | Vacuolar ATP synthase 16 kDa proteolipid subunit                                | 196.163 | 193.894 | 236.293 | 206.105 | 177.392 | 192.048 | 1718.42 | 939.238 |
| AAEL012113 | vacuolar ATP synthase proteolipid subunit                                       | 49.9024 | 54.0354 | 58.8002 | 58.2329 | 65.9549 | 71.3225 | 588.994 | 300.486 |
| AAEL011025 | vacuolar ATP synthase subunit ac39                                              | 54.5166 | 55.5565 | 31.969  | 36.6808 | 65.7049 | 71.8765 | 422.093 | 222.685 |
| AAEL015594 | vacuolar ATP synthase subunit c                                                 | 10.1353 | 8.30098 | 23.2653 | 16.8147 | 7.45373 | 8.80989 | 63.2901 | 28.5664 |
| AAEL012035 | vacuolar ATP synthase subunit e                                                 | 82.772  | 83.1683 | 100.342 | 94.4843 | 73.2459 | 79.2132 | 746.115 | 410.904 |
| AAEL002464 | vacuolar ATP synthase subunit f                                                 | 62.771  | 62.4053 | 60.7378 | 53.1708 | 52.6164 | 57.9743 | 549.902 | 333.925 |
| AAEL012819 | vacuolar ATP synthase subunit g                                                 | 18.3779 | 17.102  | 23.2299 | 20.1102 | 17.0743 | 20.753  | 417.077 | 197.804 |
| AAEL006516 | vacuolar ATP synthase subunit h                                                 | 34.1106 | 36.0606 | 31.7651 | 35.6771 | 30.5842 | 33.8544 | 276.734 | 149.602 |
| AAEL010819 | Vacuolar ATP synthase subunit H                                                 | 51.9829 | 56.2579 | 46.9092 | 47.4295 | 50.2229 | 59.2286 | 557.182 | 313.216 |
| AAEL007777 | vacuolar ATP synthase subunit S1                                                | 60.7339 | 58.5537 | 75.6982 | 70.571  | 67.8147 | 73.1421 | 451.624 | 247.204 |

|            |                                                              |          |          |          |          |         |         |          |         |
|------------|--------------------------------------------------------------|----------|----------|----------|----------|---------|---------|----------|---------|
| AAEL009104 | vacuolar protein sorting-associated protein (vps13)          | 7.23148  | 7.85922  | 4.58995  | 7.13688  | 10.4637 | 9.35577 | 59.4232  | 28.2219 |
| AAEL010508 | vacuolar protein sorting-associated protein (vps13)          | 7.36298  | 6.74533  | 4.88389  | 5.57501  | 8.19148 | 7.18463 | 51.7312  | 22.2802 |
| AAEL006390 | vacuolar proton atpases                                      | 0.206573 | 0.079932 | 0.618983 | 0.523602 | 3.70569 | 3.7781  | 381.13   | 191.69  |
| AAEL014053 | vacuolar proton atpases                                      | 29.6764  | 32.0726  | 29.6614  | 34.7796  | 30.3089 | 29.5453 | 0.98855  | 13.1788 |
| AAEL004486 | valacyclovir hydrolase                                       | 12.8321  | 11.7189  | 19.9932  | 17.3332  | 15.3133 | 13.1497 | 193.618  | 97.3892 |
| AAEL013093 | valacyclovir hydrolase                                       | 4.00193  | 4.02242  | 2.0415   | 4.02899  | 2.57523 | 7.94743 | 13.6031  | 1.90159 |
| AAEL006023 | Vanin-like protein 1 precursor, putative                     | 9.45427  | 9.52595  | 8.63993  | 11.2531  | 6.74802 | 5.90548 | 175.06   | 75.0626 |
| AAEL010747 | vasodilator-stimulated phosphoprotein                        | 26.797   | 27.09    | 10.7779  | 17.608   | 34.8932 | 34.8309 | 7.96688  | 15.5543 |
| AAEL006563 | Vcp                                                          | 6415.2   | 6034.95  | 3.94251  | 9.45168  | 2.47309 | 2.24234 | 142.462  | 2937.61 |
| AAEL000793 | venom allergen                                               | 0.060181 | 0        | 0        | 0.100269 | 0       | 0       | 11.5341  | 0       |
| AAEL001749 | ventrroid transmembrane protein, putative                    | 26.4776  | 23.5702  | 6.78709  | 11.7558  | 19.041  | 17.8764 | 5.05111  | 12.2526 |
| AAEL005879 | vinculin                                                     | 18.8093  | 20.2426  | 18.0922  | 19.4152  | 16.295  | 16.8555 | 86.9578  | 36.5851 |
| AAEL014223 | vitellogenin receptor (VgR)                                  | 86.1687  | 105.539  | 43.0886  | 50.6493  | 121.541 | 111.07  | 0        | 59.2462 |
| AAEL006966 | vitellogenin, putative                                       | 9.0168   | 11.2601  | 14.1876  | 14.5606  | 18.8776 | 17.5995 | 144.8    | 70.8584 |
| AAEL010434 | vitellogenin-A1 precursor                                    | 0        | 0        | 4.78064  | 9.61987  | 3.62803 | 3.54284 | 284.744  | 7567.78 |
| AAEL001872 | voltage-dependent anion-selective channel                    | 386.877  | 400.781  | 456.054  | 364.941  | 289.064 | 295.952 | 700.798  | 478.174 |
| AAEL013277 | voltage-gated sodium channel                                 | 11.8078  | 17.3627  | 8.02759  | 10.6788  | 8.612   | 10.6329 | 0        | 33151.7 |
| AAEL011639 | WAP four-disulfide core domain protein 2 precursor, putative | 29.1543  | 37.0544  | 13.235   | 8.05812  | 29.7694 | 41.4447 | 0.682999 | 40.6099 |
| AAEL003975 | wdpeat protein                                               | 13.6396  | 15.5641  | 14.7762  | 12.7917  | 21.9262 | 22.4031 | 2.91452  | 9.17687 |
| AAEL011535 | wdpeat protein                                               | 10.8432  | 9.00598  | 9.6633   | 4.76734  | 12.1641 | 11.4807 | 3.34802  | 11.488  |
| AAEL004063 | wdpeat protein                                               | 14.6277  | 14.2282  | 19.4345  | 14.5278  | 32.4287 | 30.612  | 3.40798  | 9.65167 |
| AAEL003539 | wdpeat protein                                               | 35.8128  | 36.3076  | 51.2887  | 46.7774  | 25.7361 | 27.3203 | 13.6966  | 23.433  |
| AAEL002802 | wdpeat protein                                               | 17.2409  | 15.8762  | 24.7109  | 22.889   | 13.5384 | 14.0291 | 4.01466  | 9.14871 |
| AAEL005041 | wdpeat protein                                               | 20.7343  | 22.2337  | 16.8917  | 15.3921  | 32.8885 | 31.3533 | 7.64986  | 14.0052 |
| AAEL010013 | wdpeat protein                                               | 26.5512  | 25.9985  | 29.2401  | 29.4895  | 22.1671 | 23.3419 | 6.66448  | 16.2011 |
| AAEL016999 | white                                                        | 25.5842  | 24.383   | 28.8232  | 29.0951  | 23.434  | 23.9288 | 1.09818  | 14.1881 |
| AAEL013892 | wiskott-aldrich syndrome protein                             | 9.72792  | 10.2761  | 17.5357  | 18.0014  | 6.85449 | 6.85408 | 96.6119  | 32.8504 |
| AAEL004320 | WOC protein, putative                                        | 62.9318  | 72.9898  | 115.697  | 99.7205  | 59.2573 | 73.2505 | 80.5317  | 81.0811 |
| AAEL004558 | wuho                                                         | 20.583   | 18.3986  | 25.7752  | 17.6336  | 19.0489 | 17.1946 | 5.82775  | 11.8317 |
| AAEL007892 | xaa-pro aminopeptidase                                       | 0.73742  | 0.697663 | 0.492829 | 0.379067 | 1.49625 | 1.22246 | 555.068  | 256.051 |
| AAEL009764 | xaa-pro aminopeptidase                                       | 9.30025  | 10.2076  | 7.87383  | 8.07018  | 12.6749 | 13.5468 | 258.924  | 115.707 |
| AAEL008893 | xaa-pro dipeptidase pepd/pepq(e.coli)                        | 29.2614  | 28.5895  | 30.5609  | 37.578   | 21.4381 | 21.9066 | 307.862  | 169.478 |

|            |                                    |          |          |          |          |          |          |          |          |
|------------|------------------------------------|----------|----------|----------|----------|----------|----------|----------|----------|
| AAEL010077 | xpa-binding protein 1 (mbdin)      | 28.6089  | 29.4597  | 39.7148  | 32.9235  | 38.8463  | 39.6454  | 7.60364  | 20.5113  |
| AAEL013821 | xylulose kinase                    | 40.0747  | 39.9637  | 5.32105  | 3.3587   | 13.2958  | 12.6151  | 16.2501  | 26.9551  |
| AAEL006830 | yellow protein precursor           | 236.535  | 172.774  | 280.062  | 242.297  | 106.925  | 109.99   | 2.3411   | 101.373  |
| AAEL014001 | yellow protein precursor, putative | 19.5063  | 15.2823  | 42.0526  | 42.9911  | 13.7259  | 11.3232  | 0.247344 | 7.16594  |
| AAEL008609 | zinc carboxypeptidase              | 2.1512   | 2.81424  | 0.307258 | 0.275405 | 0.849825 | 1.71354  | 792.265  | 436.177  |
| AAEL003781 | zinc carboxypeptidase              | 4.73787  | 3.96898  | 3.31853  | 4.05631  | 4.1625   | 4.26085  | 69.7198  | 28.543   |
| AAEL001863 | zinc carboxypeptidase              | 312.067  | 276.378  | 74.7141  | 92.1887  | 262.994  | 334.839  | 13329.9  | 6037.16  |
| AAEL003424 | zinc carboxypeptidase              | 0.115213 | 0        | 0.112067 | 0.097507 | 1.13674  | 2.06023  | 149.032  | 47.2863  |
| AAEL008600 | zinc carboxypeptidase              | 0.07852  | 0.22699  | 0.146863 | 0.170639 | 2.61319  | 1.89183  | 148.613  | 70.8379  |
| AAEL001839 | zinc carboxypeptidase              | 0.223616 | 0.525831 | 0.23111  | 0.460135 | 0.321721 | 0.263161 | 69.7134  | 15.0542  |
| AAEL001840 | zinc carboxypeptidase              | 43.6701  | 45.5297  | 30.3398  | 41.8008  | 9.25998  | 8.79685  | 753.214  | 366.465  |
| AAEL011328 | zinc finger protein                | 32.4338  | 33.9113  | 19.8456  | 29.0511  | 26.0402  | 27.5817  | 10.0252  | 21.5494  |
| AAEL002285 | zinc finger protein                | 12.3608  | 13.4867  | 14.7683  | 11.8025  | 9.44031  | 13.6236  | 3.58454  | 10.2782  |
| AAEL002451 | zinc finger protein                | 6.91229  | 6.6843   | 6.7442   | 7.93232  | 7.20561  | 7.70287  | 0.235766 | 3.92499  |
| AAEL009508 | zinc finger protein                | 61.4798  | 59.4416  | 34.7304  | 47.654   | 38.6703  | 39.4991  | 4.11267  | 32.9683  |
| AAEL002120 | zinc finger protein                | 11.7523  | 13.0956  | 13.871   | 13.4081  | 8.24376  | 8.91186  | 2.03484  | 7.12738  |
| AAEL007427 | zinc finger protein                | 116.87   | 112.879  | 64.075   | 89.0094  | 73.1744  | 73.5665  | 4.47111  | 56.846   |
| AAEL014034 | zinc finger protein                | 41.5561  | 38.6321  | 77.7973  | 73.4725  | 34.2299  | 36.678   | 11.9442  | 24.401   |
| AAEL000974 | zinc finger protein                | 10.4548  | 10.1262  | 16.8285  | 14.5174  | 7.72793  | 7.07485  | 0.887104 | 7.51441  |
| AAEL003009 | zinc finger protein                | 49.5385  | 47.1842  | 52.4742  | 54.6815  | 37.923   | 40.3281  | 167.881  | 80.6894  |
| AAEL008579 | zinc finger protein                | 17.087   | 17.5264  | 15.263   | 16.4364  | 13.0884  | 14.1162  | 2.46703  | 7.73369  |
| AAEL006609 | zinc finger protein                | 14.69    | 11.3611  | 12.7239  | 13.1814  | 83.2784  | 50.7604  | 47.1489  | 22.4949  |
| AAEL011904 | zinc finger protein                | 25.5375  | 27.073   | 31.5829  | 31.264   | 20.6017  | 20.9463  | 12.0432  | 19.7876  |
| AAEL012039 | zinc finger protein                | 7.95965  | 7.84829  | 10.7043  | 10.424   | 13.5409  | 13.6811  | 0.298759 | 3.56799  |
| AAEL012224 | zinc finger protein                | 31.7072  | 27.574   | 39.3352  | 38.9291  | 19.7329  | 13.5109  | 22.6821  | 28.9508  |
| AAEL004815 | zinc finger protein                | 29.9121  | 30.5258  | 34.1442  | 30.2074  | 29.3652  | 28.7264  | 9.69208  | 17.2492  |
| AAEL010501 | zinc finger protein                | 17.7337  | 17.713   | 22.7426  | 19.5253  | 22.9492  | 21.6404  | 5.71697  | 11.4281  |
| AAEL007468 | zinc finger protein, putative      | 10.286   | 10.8134  | 15.3781  | 12.8936  | 11.5868  | 10.8168  | 2.44309  | 8.26388  |
| AAEL001968 | zinc transporter                   | 78.8552  | 92.4864  | 59.5997  | 71.5316  | 25.4206  | 29.7587  | 44.93    | 72.0539  |
| AAEL014762 | zinc transporter                   | 75.2093  | 70.1722  | 46.6038  | 46.7026  | 30.5506  | 36.4998  | 1126.83  | 540.1    |
| AAEL017268 | uncharacterized protein            | 34.5995  | 65.6331  | 13.8819  | 19.0807  | 18.0494  | 29.6005  | 28.1477  | 29.9126  |
| AAEL017349 | uncharacterized protein            | 537.98   | 603.679  | 309.222  | 399.453  | 264.415  | 325.477  | 469.877  | 475.566  |
| AAEL017320 | uncharacterized protein            | 0.407171 | 0.68932  | 7.3147   | 3.7075   | 2.4122   | 2.97298  | 189.222  | 96.3036  |
| AAEL017502 | uncharacterized protein            | 0        | 0        | 0.119664 | 146.768  | 0        | 0        | 0        | 0.295997 |
| AAEL017407 | uncharacterized protein            | 6.89859  | 12.5221  | 22.2355  | 23.73    | 10.588   | 11.9013  | 213.237  | 102.254  |



|            |                         |          |          |          |          |          |          |          |          |
|------------|-------------------------|----------|----------|----------|----------|----------|----------|----------|----------|
| AAELO17443 | uncharacterized protein | 0.919705 | 1.03073  | 0.603134 | 0.585621 | 1.24456  | 0.90921  | 20.0951  | 6.25175  |
| AAELO17146 | uncharacterized protein | 19.6778  | 11.2055  | 20.4646  | 9.47485  | 13.7339  | 13.2239  | 17.9262  | 28.2184  |
| AAELO18037 | uncharacterized protein | 39.2491  | 34.1102  | 88.5434  | 71.0478  | 18.2942  | 19.2352  | 8.86734  | 23.2418  |
| AAELO17385 | uncharacterized protein | 79.7074  | 81.3279  | 86.8986  | 78.752   | 70.3762  | 68.3422  | 44.343   | 64.9085  |
| AAELO17144 | uncharacterized protein | 146.876  | 134.908  | 45.5254  | 51.8514  | 397.803  | 373.237  | 7.28154  | 17.0808  |
| AAELO17467 | uncharacterized protein | 0.024146 | 0.206031 | 62.4241  | 335.249  | 0.086151 | 0.117016 | 0.362918 | 0.076718 |
| AAELO17471 | uncharacterized protein | 0        | 0        | 0.534352 | 41.3375  | 0        | 0        | 0        | 0        |
| AAELO16984 | uncharacterized protein | 447.87   | 430.432  | 681.493  | 584.116  | 131.169  | 137.834  | 756.275  | 503.863  |
| AAELO17029 | uncharacterized protein | 57.502   | 61.4911  | 61.5295  | 51.5868  | 42.0671  | 38.6956  | 2.06167  | 42.1276  |
| AAELO17054 | uncharacterized protein | 24.9154  | 23.4485  | 27.213   | 25.6748  | 16.3856  | 16.3586  | 9.59268  | 19.4289  |
| AAELO17055 | uncharacterized protein | 4.95891  | 4.61477  | 5.70228  | 5.80029  | 4.40659  | 3.57234  | 0.064207 | 3.42214  |
| AAELO17061 | uncharacterized protein | 0.911904 | 1.63465  | 1.78195  | 1.45088  | 3.79767  | 3.45431  | 230.838  | 136.533  |
| AAELO17066 | uncharacterized protein | 321.734  | 337.666  | 530.058  | 453.254  | 458.208  | 466.796  | 417.241  | 335.043  |
| AAELO17071 | uncharacterized protein | 1.72315  | 1.33091  | 0.985404 | 1.43657  | 2.70924  | 2.15237  | 75.004   | 33.4988  |
| AAELO17082 | uncharacterized protein | 81.1417  | 82.1844  | 141.856  | 108.744  | 48.9616  | 49.7552  | 33.3234  | 56.5661  |
| AAELO17089 | uncharacterized protein | 36.5801  | 34.939   | 17.2982  | 13.9926  | 18.3052  | 19.4941  | 202.293  | 100.58   |
| AAELO17113 | uncharacterized protein | 48.9425  | 59.6005  | 34.0526  | 32.3121  | 64.9953  | 61.3071  | 13.5997  | 34.7303  |
| AAELO17117 | uncharacterized protein | 0        | 0.103027 | 10.7894  | 475.962  | 0.129866 | 0        | 0.343367 | 0.251243 |
| AAELO17168 | uncharacterized protein | 39.4268  | 41.1754  | 49.3474  | 38.3554  | 40.8355  | 38.1974  | 1.55511  | 22.9707  |
| AAELO17179 | uncharacterized protein | 177.548  | 153.339  | 308.419  | 307.746  | 97.4454  | 109.515  | 3.84641  | 97.1788  |
| AAELO17186 | uncharacterized protein | 11.5132  | 11.6701  | 30.0268  | 20.6634  | 5.00861  | 4.57193  | 1.39772  | 6.6036   |
| AAELO17231 | uncharacterized protein | 1054.41  | 1190.29  | 914.151  | 760.363  | 948.343  | 1209.14  | 4917.27  | 2296.47  |
| AAELO17258 | uncharacterized protein | 150.762  | 149.862  | 159.771  | 136.51   | 150.279  | 160.405  | 91.2704  | 108.785  |
| AAELO17269 | uncharacterized protein | 128.729  | 102.555  | 243.679  | 232.534  | 55.9542  | 61.2558  | 4.49969  | 84.1543  |
| AAELO17280 | uncharacterized protein | 30.134   | 29.6427  | 33.0664  | 31.3947  | 32.8439  | 33.637   | 14.5004  | 21.4456  |
| AAELO17284 | uncharacterized protein | 4.1472   | 3.38643  | 1.42775  | 1.46513  | 4.12058  | 4.12582  | 169.138  | 68.6971  |
| AAELO17291 | uncharacterized protein | 0.051164 | 0        | 0        | 0.042709 | 0        | 0        | 58.4813  | 26.2354  |
| AAELO17329 | uncharacterized protein | 18.1509  | 16.9252  | 23.9813  | 38.1473  | 4.78791  | 5.35888  | 4.20648  | 10.5763  |
| AAELO17334 | uncharacterized protein | 43.0674  | 1.03829  | 2.75874  | 1.85916  | 0.817861 | 20.2139  | 177.148  | 20.7884  |
| AAELO17368 | uncharacterized protein | 91.962   | 94.797   | 73.8007  | 69.2092  | 85.5368  | 80.3338  | 66.0544  | 75.4679  |
| AAELO17380 | uncharacterized protein | 32.1549  | 9.79262  | 23.8532  | 11.9188  | 417.249  | 174.555  | 1.8195   | 2.72489  |
| AAELO17391 | uncharacterized protein | 58.3795  | 55.8071  | 42.6715  | 53.0009  | 45.5655  | 46.9643  | 13.9931  | 31.968   |
| AAELO17395 | uncharacterized protein | 85.1884  | 85.1169  | 109.569  | 109.537  | 83.4129  | 83.2287  | 42.1756  | 60.0787  |
| AAELO17413 | uncharacterized protein | 17702.6  | 16218.5  | 8467.18  | 11015.2  | 12940    | 15811.1  | 69543.8  | 34084.1  |
| AAELO17438 | uncharacterized protein | 113.241  | 122.734  | 163.471  | 174.653  | 73.7677  | 70.8838  | 27.4413  | 59.5133  |

|            |                         |          |          |          |          |          |          |          |          |
|------------|-------------------------|----------|----------|----------|----------|----------|----------|----------|----------|
| AAELO17451 | uncharacterized protein | 272.96   | 367.824  | 330.075  | 276.007  | 80.3489  | 83.808   | 5.85446  | 173.235  |
| AAELO17455 | uncharacterized protein | 172.639  | 161.165  | 379.411  | 343.133  | 202.407  | 287.578  | 33.4343  | 99.2256  |
| AAELO17457 | uncharacterized protein | 0.601374 | 0.62224  | 0.14962  | 0.403672 | 0.297512 | 0.77708  | 5043.51  | 2305.54  |
| AAELO17473 | uncharacterized protein | 56.1546  | 55.628   | 62.7538  | 46.6417  | 54.505   | 56.9968  | 158.731  | 78.801   |
| AAELO17499 | uncharacterized protein | 37.8122  | 38.2706  | 47.856   | 28.4439  | 36.2245  | 33.1372  | 40.191   | 31.1427  |
| AAELO17514 | uncharacterized protein | 0        | 0        | 0.318357 | 0.123391 | 15.4085  | 1.49337  | 157.885  | 85.3355  |
| AAELO17545 | uncharacterized protein | 285.129  | 250.395  | 515.349  | 394.687  | 149.68   | 148.121  | 189.677  | 184.215  |
| AAELO17566 | uncharacterized protein | 20.0663  | 19.1216  | 14.9792  | 14.6954  | 14.898   | 15.6403  | 8.38098  | 14.6738  |
| AAELO18032 | uncharacterized protein | 15.0412  | 13.9957  | 4.07371  | 6.80198  | 16.1454  | 15.336   | 60.6668  | 28.0377  |
| AAELO18044 | uncharacterized protein | 0.340419 | 0.257842 | 0.184874 | 0.235176 | 1.12639  | 1.22866  | 46.6888  | 18.8929  |
| AAELO17358 | uncharacterized protein | 177.956  | 123.32   | 378.276  | 303.764  | 7.46537  | 18.0909  | 1.79391  | 70.599   |
| AAELO17251 | uncharacterized protein | 50.0269  | 46.4902  | 34.4714  | 40.8019  | 28.2901  | 30.2491  | 183.937  | 86.7293  |
| AAELO17171 | uncharacterized protein | 9.36958  | 9.21081  | 18.999   | 79.1366  | 7.38683  | 5.9403   | 6.58     | 6.34723  |
| AAELO17245 | uncharacterized protein | 6.94856  | 8.29117  | 22.1385  | 27.599   | 64.5168  | 57.9872  | 119.256  | 34.8655  |
| AAELO17228 | uncharacterized protein | 37.3827  | 41.0169  | 98.0394  | 69.3781  | 112.386  | 100.815  | 234.267  | 147.778  |
| AAELO17045 | uncharacterized protein | 16.2774  | 12.8929  | 10.7299  | 29.2169  | 9.45357  | 19.6824  | 0        | 1.70692  |
| AAELO17425 | uncharacterized protein | 28.3536  | 23.1173  | 10.9683  | 13.5679  | 24.3186  | 12.3799  | 71.3467  | 27.8808  |
| AAELO17198 | uncharacterized protein | 2363.83  | 2583.83  | 1053.28  | 1029     | 5395.91  | 5676.49  | 4539.97  | 3960.45  |
| AAELO18031 | uncharacterized protein | 44.4652  | 45.3957  | 54.4724  | 51.3612  | 38.8651  | 40.3784  | 0.843808 | 13.8875  |
| AAELO16960 | uncharacterized protein | 28.7772  | 29.2068  | 18.5037  | 21.7175  | 21.6693  | 20.9456  | 9.56199  | 16.8287  |
| AAELO16962 | uncharacterized protein | 43.2847  | 44.2409  | 47.6953  | 47.6335  | 45.6503  | 46.126   | 14.5495  | 27.467   |
| AAELO16982 | uncharacterized protein | 277.729  | 269.206  | 408.572  | 362.443  | 192.28   | 198.072  | 78.7002  | 185.385  |
| AAELO16986 | uncharacterized protein | 61.0192  | 73.0207  | 62.1773  | 50.2128  | 80.845   | 65.1847  | 21.2067  | 46.6116  |
| AAELO17022 | uncharacterized protein | 2.03158  | 2.40061  | 8.07923  | 9.60506  | 42.5458  | 43.7315  | 11831.4  | 4580.51  |
| AAELO17075 | uncharacterized protein | 192.241  | 214.802  | 79.8473  | 85.0814  | 640.094  | 610.037  | 76.8832  | 136.292  |
| AAELO17096 | uncharacterized protein | 2969.03  | 2993.94  | 1030.55  | 1022.69  | 6175.17  | 5975.41  | 3146.89  | 2739.13  |
| AAELO17098 | uncharacterized protein | 1073.46  | 956.799  | 1813.54  | 1191.02  | 318.726  | 328.261  | 12.9188  | 616.392  |
| AAELO17119 | uncharacterized protein | 607.49   | 728.123  | 270.25   | 325.984  | 1365.86  | 1615.05  | 13594.7  | 7295.45  |
| AAELO17140 | uncharacterized protein | 7.84027  | 8.23959  | 8.15785  | 7.79213  | 9.60789  | 9.52363  | 80.9975  | 34.7632  |
| AAELO17194 | uncharacterized protein | 41.7928  | 42.7037  | 54.7981  | 50.4367  | 35.3568  | 36.5622  | 7.40977  | 24.298   |
| AAELO17197 | uncharacterized protein | 0        | 0        | 20.4214  | 1101.85  | 0        | 0.134699 | 0        | 0        |
| AAELO17240 | uncharacterized protein | 61.8835  | 61.1618  | 71.7032  | 71.8722  | 50.6265  | 53.3882  | 16.512   | 37.275   |
| AAELO17257 | uncharacterized protein | 0        | 0        | 137.687  | 587.944  | 0        | 0        | 0        | 0.488442 |
| AAELO17317 | uncharacterized protein | 21.7346  | 10.2755  | 18.2759  | 16.883   | 14.6499  | 21.5307  | 10.4869  | 1.41571  |
| AAELO17321 | uncharacterized protein | 76.1893  | 82.2699  | 67.241   | 78.4758  | 70.4939  | 70.1495  | 8.56926  | 48.8626  |

|            |                         |          |          |          |          |          |          |          |          |
|------------|-------------------------|----------|----------|----------|----------|----------|----------|----------|----------|
| AAELO17337 | uncharacterized protein | 14.1553  | 17.0393  | 24.2888  | 17.506   | 22.7132  | 20.7775  | 0.445946 | 7.63146  |
| AAELO17386 | uncharacterized protein | 17.4406  | 18.2791  | 32.2734  | 61.9993  | 7.69615  | 5.75483  | 53.0768  | 38.9922  |
| AAELO17424 | uncharacterized protein | 20.9876  | 21.4453  | 44.2755  | 32.1976  | 20.2655  | 21.7133  | 7.70041  | 15.0357  |
| AAELO17497 | uncharacterized protein | 90.2047  | 89.0154  | 74.6906  | 74.2665  | 102.388  | 100.388  | 19.2128  | 50.8626  |
| AAELO17994 | uncharacterized protein | 1.46509  | 0.943043 | 4.38551  | 16.7445  | 2.54845  | 2.69302  | 0.093846 | 0.497504 |
| AAELO18040 | uncharacterized protein | 12.0032  | 10.3341  | 15.3693  | 18.1673  | 23.6451  | 22.4166  | 0.720069 | 4.67186  |
| AAELO17501 | uncharacterized protein | 939.27   | 771.472  | 0.261286 | 0.303021 | 0.33597  | 0        | 16.9795  | 486.211  |
| AAELO17521 | uncharacterized protein | 22.7778  | 22.261   | 27.7357  | 24.2605  | 23.2052  | 22.1075  | 0.620645 | 13.1232  |
| AAELO17226 | uncharacterized protein | 0.053516 | 0.101652 | 0.140535 | 0.163205 | 2.40608  | 2.36843  | 334.659  | 142.948  |
| AAELO17437 | uncharacterized protein | 124.364  | 137.83   | 67.9145  | 74.9282  | 155.249  | 149.288  | 36.7684  | 76.3026  |
| AAELO17543 | uncharacterized protein | 21.8998  | 19.0716  | 16.0082  | 17.9972  | 16.5823  | 17.494   | 9.18633  | 15.7819  |
| AAELO17367 | uncharacterized protein | 94.1808  | 75.3883  | 148.676  | 192.808  | 16.3462  | 18.6446  | 10.9567  | 44.7707  |
| AAELO17421 | uncharacterized protein | 110.021  | 116.032  | 70.3063  | 52.8287  | 134.401  | 129.371  | 23.7942  | 66.1583  |
| AAELO17513 | uncharacterized protein | 31.5233  | 49.8467  | 20.9979  | 33.5769  | 46.806   | 38.6187  | 36.5477  | 24.7753  |
| AAELO17485 | uncharacterized protein | 28.7523  | 24.8791  | 4.049    | 18.2675  | 11.6732  | 10.2385  | 38.9639  | 41.9055  |
| AAELO17121 | uncharacterized protein | 77.324   | 76.411   | 24.8959  | 33.5122  | 19.3     | 21.1729  | 479.899  | 297.644  |
| AAELO17481 | uncharacterized protein | 776.439  | 826.729  | 1253.69  | 990.317  | 750.11   | 757.246  | 226.203  | 481.179  |
| AAELO17509 | uncharacterized protein | 673.729  | 1512.49  | 1928.05  | 1132.42  | 669.63   | 0        | 0        | 1273.04  |
| AAELO16995 | uncharacterized protein | 1477.52  | 1464.25  | 1822.75  | 1473.9   | 2941.54  | 3093.49  | 1629.01  | 1294.51  |
| AAELO17044 | uncharacterized protein | 21.9952  | 21.6512  | 23.4191  | 31.3641  | 13.4066  | 12.9108  | 5.43506  | 13.8228  |
| AAELO17343 | uncharacterized protein | 20.9817  | 18.6122  | 14.0677  | 17.2523  | 18.5228  | 22.0036  | 1.3569   | 13.2962  |
| AAELO17563 | uncharacterized protein | 19.1779  | 24.8613  | 3.3781   | 4.21184  | 5.45432  | 8.91127  | 0        | 10.5111  |
| AAELO17093 | uncharacterized protein | 43.3429  | 39.1126  | 1.7105   | 7.34752  | 7.16694  | 8.51983  | 1.36911  | 24.004   |
| AAELO17494 | uncharacterized protein | 147.805  | 178.599  | 81.8695  | 119.958  | 176.922  | 153.455  | 483.525  | 326.844  |
| AAELO17282 | uncharacterized protein | 18.2475  | 16.4577  | 22.9953  | 21.6895  | 21.0162  | 21.2289  | 2.52256  | 7.95336  |
| AAELO17512 | uncharacterized protein | 3.2481   | 2.32141  | 2.36906  | 2.85185  | 1.83609  | 2.91372  | 118.617  | 55.6205  |
| AAELO18038 | uncharacterized protein | 15.8473  | 15.3403  | 13.3772  | 11.8104  | 16.8981  | 18.0413  | 121.643  | 59.8312  |
| AAELO17057 | uncharacterized protein | 24.256   | 31.8374  | 34.1984  | 23.9638  | 15.9232  | 17.895   | 13.2536  | 24.8392  |
| AAELO16992 | uncharacterized protein | 37.8019  | 30.5446  | 0.027742 | 0        | 0.032736 | 0.035401 | 0.268099 | 13.5904  |
| AAELO17388 | uncharacterized protein | 194.341  | 312.594  | 86.64    | 68.2832  | 90.2643  | 96.7941  | 208.405  | 243.367  |
| AAELO18035 | uncharacterized protein | 50.5051  | 47.1523  | 19.1131  | 29.4273  | 52.2895  | 53.2454  | 23.465   | 34.2387  |
| AAELO17322 | uncharacterized protein | 16.1348  | 14.0478  | 16.0913  | 20.0784  | 18.3852  | 16.2661  | 383.716  | 183.038  |
| AAELO17516 | uncharacterized protein | 987.205  | 1017.47  | 404.004  | 360.288  | 2751.4   | 2728.78  | 1737.38  | 1347.08  |
| AAELO17042 | uncharacterized protein | 32.3302  | 31.7363  | 42.0402  | 24.5167  | 25.0764  | 25.7408  | 131.282  | 69.6093  |
| AAELO17289 | uncharacterized protein | 9.169    | 7.57484  | 13.1769  | 11.1998  | 10.6174  | 10.4703  | 0.13826  | 4.96745  |

|            |                         |          |          |          |          |          |          |          |          |
|------------|-------------------------|----------|----------|----------|----------|----------|----------|----------|----------|
| AAELO17244 | uncharacterized protein | 1.29596  | 1.83743  | 2.91744  | 1.40054  | 1.82289  | 1.98446  | 145.538  | 73.73    |
| AAELO17404 | uncharacterized protein | 0.98589  | 0.731195 | 775.302  | 4272.28  | 0.134817 | 1.21088  | 1.34722  | 1.06441  |
| AAELO17184 | uncharacterized protein | 30.7728  | 17.3486  | 60.5252  | 58.1521  | 22.3898  | 22.0994  | 12.6367  | 28.8257  |
| AAELO17207 | uncharacterized protein | 41.8425  | 42.7477  | 33.8698  | 38.139   | 35.7736  | 35.1866  | 20.9049  | 28.7193  |
| AAELO17540 | uncharacterized protein | 61.0066  | 71.7802  | 68.34    | 59.4597  | 22.3553  | 33.1598  | 822.639  | 340.797  |
| AAELO17013 | uncharacterized protein | 16.792   | 16.6443  | 22.9625  | 25.7429  | 17.6545  | 15.544   | 4.60261  | 12.9745  |
| AAELO17482 | uncharacterized protein | 0.088899 | 0        | 0.342707 | 0.078335 | 0.560192 | 0.863556 | 59.6393  | 27.9194  |
| AAELO16974 | uncharacterized protein | 4.19249  | 6.0072   | 0.598941 | 1.97256  | 6.98012  | 5.92964  | 1.3177   | 6.53658  |
| AAELO17069 | uncharacterized protein | 0.150017 | 0        | 2.16158  | 34.2035  | 0        | 0        | 0        | 0.262581 |
| AAELO17506 | uncharacterized protein | 8.73404  | 7.44723  | 7.86569  | 9.67279  | 5.59876  | 6.95793  | 81.6002  | 35.3273  |
| AAELO17247 | uncharacterized protein | 409.851  | 380.426  | 547.392  | 549.49   | 365.87   | 425.75   | 1553.29  | 878.09   |
| AAELO17470 | uncharacterized protein | 22.1131  | 24.3038  | 25.0168  | 27.199   | 19.3262  | 19.6413  | 1.57245  | 12.5235  |
| AAELO16979 | uncharacterized protein | 8.79346  | 6.76329  | 12.8864  | 11.2892  | 8.40155  | 7.50798  | 0.242814 | 4.08424  |
| AAELO17191 | uncharacterized protein | 43.2032  | 45.4671  | 126.135  | 100.835  | 31.835   | 32.3004  | 1.82848  | 20.18    |
| AAELO17445 | uncharacterized protein | 0.116366 | 0.050323 | 0.217963 | 0.102145 | 0.469032 | 0.44737  | 22.0268  | 7.35968  |
| AAELO17112 | uncharacterized protein | 2.35996  | 8.03108  | 13.7247  | 15.6391  | 0        | 7.03628  | 0        | 8.37962  |
| AAELO16971 | uncharacterized protein | 17.6584  | 11.8756  | 0.020769 | 0.515153 | 0.070071 | 0.017016 | 0.171508 | 7.57498  |
| AAELO17525 | uncharacterized protein | 11.3113  | 25.8162  | 110.871  | 75.5101  | 65.1517  | 40.8242  | 25.0287  | 10.0199  |
| AAELO17520 | uncharacterized protein | 32.9979  | 37.1689  | 52.3588  | 55.1793  | 43.4112  | 35.1208  | 0        | 27.605   |

Abbreviation: CC\_1d\_C, carcass 1 day PBM; CC\_1d\_I, carcass 1 day post DENV infected blood meal; CC\_2d\_C, carcass 2 days post normal blood meal; CC\_2d\_I, carcass 2 days post DENV infected blood meal; CC\_7d\_C, carcass 7 days post normal blood meal; CC\_7d\_I, carcass 2 days post DENV infected blood meal; MG\_1d\_C, midgut 1 day post normal blood meal; MG\_1d\_I, midgut 1 day post DENV infected blood meal.
