# Supplementary material for: Aedes aegypti HPX8C modulates immune responses against viral infection
Source: PubMed Central journal article supplement (PMC6464178; doi:10.1371/journal.pntd.0007287), 2019-04-15
Supplement: pntd.0007287.s002.pdf [file pntd.0007287.s002.pdf]

**S2\_Table. Immune DEGs post DENV infection (p<0.05)**

| GeneNames  | Name     | Family name | Normal Blood<br>Meal (value1) | DENV infected blood<br>meal (value2) | log2 (value1/value2) | log2 (value1/value2)<br>normalized | z-score  | p-value  | Sample        |
|------------|----------|-------------|-------------------------------|--------------------------------------|----------------------|------------------------------------|----------|----------|---------------|
| AAEL000598 | CECD     | Cecropin    | 8.79978                       | 0                                    | 4.137467456          | 4.142424294                        | 2.940538 | 0.003276 | Carcass_1 day |
| AAEL000611 | CECE     | Cecropin    | 57.6952                       | 0                                    | 6.850379393          | 6.855336231                        | 7.786985 | 6.86E-15 | Carcass_1 day |
| AAEL000625 | CECF     | Cecropin    | 12.6296                       | 0                                    | 4.658737042          | 4.663693881                        | 3.62353  | 0.000291 | Carcass_1 day |
| AAEL000621 | CECN     | Cecropin    | 69.3293                       | 11.326                               | 2.613826759          | 2.618783598                        | 6.794714 | 1.09E-11 | Carcass_1 day |
| AAEL003857 | DEFD     | Defensin    | 23.135                        | 7.37591                              | 1.649184142          | 1.65414098                         | 2.930289 | 0.003386 | Carcass_1 day |
| AAEL004390 | HPX8B    | HPX         | 743.736                       | 609.752                              | 0.286568021          | 0.29152486                         | 3.710474 | 0.000207 | Carcass_1 day |
| AAEL004120 | ML1      | ML          | 77.7553                       | 106.332                              | -0.451562911         | -0.446606073                       | -2.08749 | 0.036844 | Carcass_1 day |
| AAEL004112 | TPX2     | TPX         | 1025.42                       | 912.16                               | 0.16885613           | 0.173812969                        | 2.651961 | 0.008003 | Carcass_1 day |
| AAEL000627 | CECA     | Cecropin    | 0                             | 23.6197                              | -5.561918736         | -5.45516626                        | -4.95827 | 7.11E-07 | Carcass_2 day |
| AAEL000598 | CECD     | Cecropin    | 23.0968                       | 7.33895                              | 1.654047411          | 1.760799887                        | 3.1151   | 0.001839 | Carcass_2 day |
| AAEL000625 | CECF     | Cecropin    | 2.2785                        | 26.1567                              | -3.521024262         | -3.414271786                       | -4.65124 | 3.3E-06  | Carcass_2 day |
| AAEL015515 | CECG     | Cecropin    | 31.3471                       | 56.638                               | -0.85343834          | -0.746685864                       | -2.37653 | 0.017476 | Carcass_2 day |
| AAEL006271 | CuSOD2   | SOD-Cu-Zn   | 645.142                       | 454.918                              | 0.504010222          | 0.610762699                        | 6.974252 | 3.08E-12 | Carcass_2 day |
| AAEL003841 | DEFA     | Defensin    | 24.1906                       | 56.6106                              | -1.226625662         | -1.119873185                       | -3.34028 | 0.000837 | Carcass_2 day |
| AAEL004401 | HPX7     | HPX         | 17.6291                       | 43.2112                              | -1.293446472         | -1.186693996                       | -3.05681 | 0.002237 | Carcass_2 day |
| AAEL004388 | HPX8A    | HPX         | 225.725                       | 181.715                              | 0.312888698          | 0.419641174                        | 2.928736 | 0.003403 | Carcass_2 day |
| AAEL004390 | HPX8B    | HPX         | 230.614                       | 451.652                              | -0.969731499         | -0.862979023                       | -7.604   | 2.87E-14 | Carcass_2 day |
| AAEL004386 | HPX8C    | HPX         | 155.745                       | 259.284                              | -0.735347334         | -0.628594858                       | -4.36996 | 1.24E-05 | Carcass_2 day |
| AAEL004120 | ML1      | ML          | 17.5121                       | 7.87103                              | 1.153727754          | 1.26048023                         | 2.117597 | 0.034209 | Carcass_2 day |
| AAEL009557 | ML17     | ML          | 746.298                       | 311.119                              | 1.262285317          | 1.369037793                        | 14.74258 | 3.43E-49 | Carcass_2 day |
| AAEL004112 | TPX2     | TPX         | 1824.5                        | 1617.74                              | 0.173521392          | 0.280273868                        | 5.707015 | 1.15E-08 | Carcass_2 day |
| AAEL003389 | ATT      | Attacin     | 0.413053                      | 8.32031                              | -4.332238467         | -4.321870948                       | -2.88417 | 0.003924 | Carcass_7 day |
| AAEL000627 | CECA     | Cecropin    | 2.95653                       | 22.1999                              | -2.908576357         | -2.898208838                       | -4.04322 | 5.27E-05 | Carcass_7 day |
| AAEL000598 | CECD     | Cecropin    | 66.9018                       | 169.905                              | -1.344611377         | -1.334243858                       | -6.75301 | 1.45E-11 | Carcass_7 day |
| AAEL000611 | CECE     | Cecropin    | 518.766                       | 403.119                              | 0.363878146          | 0.374245664                        | 3.924081 | 8.71E-05 | Carcass_7 day |
| AAEL015515 | CECG     | Cecropin    | 229.9                         | 177.97                               | 0.369372396          | 0.379739915                        | 2.647548 | 0.008108 | Carcass_7 day |
| AAEL000621 | CECN     | Cecropin    | 348.352                       | 410.676                              | -0.237454792         | -0.227087273                       | -2.16533 | 0.030363 | Carcass_7 day |
| AAEL003243 | CLIPB13A | CLIP-SP     | 127.822                       | 84.2719                              | 0.601012608          | 0.611380127                        | 3.053047 | 0.002265 | Carcass_7 day |
| AAEL014349 | CLIPB15  | CLIP-SP     | 56.7061                       | 36.9187                              | 0.619152184          | 0.629519703                        | 2.087166 | 0.036873 | Carcass_7 day |
| AAEL005431 | CLIPB37  | CLIP-SP     | 19.5256                       | 40.68                                | -1.058952798         | -1.048585279                       | -2.72849 | 0.006363 | Carcass_7 day |
| AAEL003632 | CLIPB39  | CLIP-SP     | 8.77276                       | 2.05816                              | 2.09167566           | 2.102043179                        | 2.123777 | 0.033689 | Carcass_7 day |
| AAEL011453 | CTL14    | CTL         | 79.2079                       | 37.8532                              | 1.065229062          | 1.075596581                        | 3.901209 | 9.57E-05 | Carcass_7 day |

|            |          |            |          |         |              |              |          |          |               |
|------------|----------|------------|----------|---------|--------------|--------------|----------|----------|---------------|
| AAEL011610 | CTLGA8   | CTL        | 46.5348  | 76.6135 | -0.719288624 | -0.708921105 | -2.68505 | 0.007252 | Carcass_7 day |
| AAEL003841 | DEFA     | Defensin   | 194.688  | 646.266 | -1.73096413  | -1.720596611 | -15.8876 | 7.72E-57 | Carcass_7 day |
| AAEL003832 | DEFC     | Defensin   | 72.6505  | 121.426 | -0.741032736 | -0.730665217 | -3.47098 | 0.000519 | Carcass_7 day |
| AAEL003857 | DEFD     | Defensin   | 259.918  | 585.462 | -1.171518987 | -1.161151468 | -11.2442 | 2.47E-29 | Carcass_7 day |
| AAEL008646 | FREP10   | FREP       | 18.0602  | 33.1618 | -0.876708448 | -0.866340929 | -2.10063 | 0.035673 | Carcass_7 day |
| AAEL009842 | GALE12   | GALE       | 46.7361  | 12.2741 | 1.928920108  | 1.939287626  | 4.651826 | 3.29E-06 | Carcass_7 day |
| AAEL004522 | GAM1     | Gambicin   | 2.97939  | 29.1755 | -3.291668492 | -3.281300973 | -4.91075 | 9.07E-07 | Carcass_7 day |
| AAEL003723 | LYSC11   | LYSC       | 61.7785  | 103.655 | -0.746612962 | -0.736245443 | -3.22828 | 0.001245 | Carcass_7 day |
| AAEL009760 | ML21     | ML         | 8.87323  | 36.3369 | -2.033904075 | -2.023536556 | -4.20278 | 2.64E-05 | Carcass_7 day |
| AAEL009474 | PGRPS1   | PGRP       | 35.5475  | 69.8153 | -0.973795136 | -0.963427617 | -3.33303 | 0.000859 | Carcass_7 day |
| AAEL007765 | SRPN10D  | SRPN-INHIB | 102.03   | 49.8842 | 1.032338569  | 1.042706088  | 4.316907 | 1.58E-05 | Carcass_7 day |
| AAEL008607 | tep3     | TEP        | 90.4102  | 63.3978 | 0.512052768  | 0.522420287  | 2.228089 | 0.025875 | Carcass_7 day |
| AAEL002309 | TPX4     | TPX        | 45.3366  | 19.3679 | 1.227008665  | 1.237376184  | 3.30147  | 0.000962 | Carcass_7 day |
| AAEL003439 | CASPS18  | CASP       | 28.2583  | 9.5937  | 1.558515445  | 1.107640787  | 2.216335 | 0.026669 | Midgut_1 day  |
| AAEL003444 | CASPS19  | CASP       | 73.7674  | 27.1631 | 1.44133525   | 0.990460592  | 3.267806 | 0.001084 | Midgut_1 day  |
| AAEL014658 | CASPS20  | CASP       | 292.058  | 121.807 | 1.261657859  | 0.810783201  | 5.491252 | 3.99E-08 | Midgut_1 day  |
| AAEL014348 | CASPS8   | CASP       | 119.074  | 46.9911 | 1.341398988  | 0.89052433   | 3.798104 | 0.000146 | Midgut_1 day  |
| AAEL013407 | CAT1     | CAT        | 1285.66  | 660.103 | 0.961746104  | 0.510871446  | 7.648842 | 2.03E-14 | Midgut_1 day  |
| AAEL004223 | CECB     | Cecropin   | 9317.64  | 5138.19 | 0.858704352  | 0.407829693  | 16.77175 | 3.93E-63 | Midgut_1 day  |
| AAEL000598 | CECD     | Cecropin   | 41.6176  | 5.40842 | 2.943914674  | 2.493040016  | 4.761781 | 1.92E-06 | Midgut_1 day  |
| AAEL000611 | CECE     | Cecropin   | 26.2734  | 0       | 5.715531004  | 5.264656346  | 4.942459 | 7.71E-07 | Midgut_1 day  |
| AAEL000625 | CECF     | Cecropin   | 278.3    | 28.5072 | 3.28724266   | 2.836368002  | 13.20063 | 8.7E-40  | Midgut_1 day  |
| AAEL000621 | CECN     | Cecropin   | 129.503  | 32.8904 | 1.97724706   | 1.526372402  | 6.080778 | 1.2E-09  | Midgut_1 day  |
| AAEL002601 | CLIPA1   | CLIP-SPH   | 0.598246 | 4.96649 | -3.053415856 | -3.504290514 | -2.26873 | 0.023285 | Midgut_1 day  |
| AAEL002590 | CLIPA12  | CLIP-SPH   | 1.54576  | 9.0413  | -2.548213886 | -2.999088544 | -2.85946 | 0.004244 | Midgut_1 day  |
| AAEL002595 | CLIPA14  | CLIP-SPH   | 8.85063  | 38.0838 | -2.105325381 | -2.556200039 | -5.40104 | 6.63E-08 | Midgut_1 day  |
| AAEL002301 | CLIPA5   | CLIP-SPH   | 12.6123  | 20.5642 | -0.705303556 | -1.156178215 | -2.28799 | 0.022138 | Midgut_1 day  |
| AAEL002629 | CLIPA6   | CLIP-SPH   | 3.60168  | 28.1524 | -2.966516005 | -3.417390664 | -5.34752 | 8.92E-08 | Midgut_1 day  |
| AAEL000074 | CLIPB1   | CLIP-SP    | 1.87514  | 20.3812 | -3.442168779 | -3.893043437 | -4.77317 | 1.81E-06 | Midgut_1 day  |
| AAEL003243 | CLIPB13A | CLIP-SP    | 1.10833  | 28.8132 | -4.700270489 | -5.151145148 | -6.03838 | 1.56E-09 | Midgut_1 day  |
| AAEL014140 | CLIPB24  | CLIP-SP    | 0.464783 | 4.80153 | -3.368864985 | -3.819739643 | -2.3022  | 0.021324 | Midgut_1 day  |
| AAEL007993 | CLIPB27  | CLIP-SP    | 50.7676  | 10.8393 | 2.227636469  | 1.77676181   | 4.243565 | 0.000022 | Midgut_1 day  |
| AAEL013245 | CLIPB28  | CLIP-SP    | 0.214443 | 3.27303 | -3.931960698 | -4.382835356 | -1.97821 | 0.047905 | Midgut_1 day  |
| AAEL000099 | CLIPB33  | CLIP-SP    | 8.85333  | 19.6862 | -1.152892554 | -1.603767212 | -2.8735  | 0.004059 | Midgut_1 day  |
| AAEL000028 | CLIPB34  | CLIP-SP    | 8.32754  | 53.2031 | -2.675548026 | -3.126422685 | -7.07319 | 1.51E-12 | Midgut_1 day  |

|            |          |           |          |         |              |              |          |          |              |
|------------|----------|-----------|----------|---------|--------------|--------------|----------|----------|--------------|
| AAEL000037 | CLIPB35  | CLIP-SP   | 0.364572 | 4.38974 | -3.589859825 | -4.040734483 | -2.24113 | 0.025018 | Midgut_1 day |
| AAEL006168 | CLIPB42  | CLIP-SP   | 0.757815 | 8.53239 | -3.493032309 | -3.943906967 | -3.10125 | 0.001927 | Midgut_1 day |
|            | CLIPB47- |           |          |         |              |              |          |          |              |
| AAEL006371 | 76       |           | 55.6895  | 19.1842 | 1.537486735  | 1.086612077  | 3.063444 | 0.002188 | Midgut_1 day |
| AAEL005064 | CLIPB5   | CLIP-SP   | 1.87371  | 17.5188 | -3.224934372 | -3.67580903  | -4.33867 | 1.43E-05 | Midgut_1 day |
| AAEL003625 | CLIPB8   | CLIP-SP   | 2.69887  | 10.2944 | -1.931432355 | -2.382307013 | -2.69709 | 0.006995 | Midgut_1 day |
| AAEL012713 | CLIPC16  | CLIP-SP   | 2.85629  | 7.66943 | -1.424976895 | -1.875851553 | -2.0012  | 0.04537  | Midgut_1 day |
| AAEL007593 | CLIPC2   | CLIP-SP   | 0.801272 | 5.62634 | -2.811832769 | -3.262707427 | -2.3444  | 0.019058 | Midgut_1 day |
| AAEL007597 | CLIPC3   | CLIP-SP   | 1.74513  | 17.2105 | -3.301882595 | -3.752757253 | -4.33219 | 1.48E-05 | Midgut_1 day |
| AAEL004540 | CLIPC6   | CLIP-SP   | 0.213504 | 8.40692 | -5.29924234  | -5.750116999 | -3.282   | 0.001031 | Midgut_1 day |
| AAEL002124 | CLIPD6   | CLIP-SPH  | 2.16265  | 9.16864 | -2.083907552 | -2.53478221  | -2.63764 | 0.008349 | Midgut_1 day |
| AAEL010773 | CLIFE10  | CLIP-SPH  | 0.208505 | 3.80932 | -4.1913796   | -4.642254259 | -2.16108 | 0.030689 | Midgut_1 day |
| AAEL005644 | CLIFE12  | CLIP-SPH  | 0.133905 | 3.16567 | -4.563229135 | -5.014103793 | -1.99508 | 0.046034 | Midgut_1 day |
| AAEL011446 | CTL17    | CTL       | 0.477066 | 13.6996 | -4.843801089 | -5.294675748 | -4.17457 | 2.99E-05 | Midgut_1 day |
| AAEL011407 | CTL20    | CTL       | 51.6562  | 19.2501 | 1.424075578  | 0.973200919  | 2.694929 | 0.00704  | Midgut_1 day |
| AAEL011408 | CTL21    | CTL       | 0.410259 | 7.82736 | -4.253918911 | -4.70479357  | -3.1057  | 0.001898 | Midgut_1 day |
| AAEL005641 | CTLGA5   | CTL       | 2195.88  | 792.114 | 1.471019235  | 1.020144577  | 18.27783 | 1.24E-74 | Midgut_1 day |
| AAEL009209 | CTLGA6   | CTL       | 5.34436  | 14.3807 | -1.428044805 | -1.878919464 | -2.74334 | 0.006082 | Midgut_1 day |
| AAEL000543 | CTLMA11  | CTL       | 2.91455  | 7.66042 | -1.394150342 | -1.845025    | -1.9777  | 0.047963 | Midgut_1 day |
| AAEL011455 | CTLMA12  | CTL       | 0        | 6.52511 | -3.706002223 | -4.156876881 | -2.75491 | 0.005871 | Midgut_1 day |
| AAEL006271 | CuSOD2   | SOD-Cu-Zn | 16.8768  | 121.368 | -2.846274803 | -3.297149461 | -10.9382 | 7.57E-28 | Midgut_1 day |
| AAEL003841 | DEFA     | Defensin  | 63.1225  | 14.9364 | 2.079321876  | 1.628447218  | 4.449764 | 8.6E-06  | Midgut_1 day |
| AAEL003857 | DEFD     | Defensin  | 113.328  | 32.7201 | 1.79225529   | 1.341380632  | 5.161794 | 2.45E-07 | Midgut_1 day |
| AAEL003849 | DEFE     | Defensin  | 204.207  | 391.537 | -0.939116327 | -1.389990985 | -11.5271 | 9.64E-31 | Midgut_1 day |
| AAEL007563 | DUOX     | HPX       | 0.461091 | 14.6599 | -4.990679946 | -5.441554604 | -4.32667 | 1.51E-05 | Midgut_1 day |
| AAEL007942 | FREP14   | FREP      | 292.798  | 159.535 | 0.876032731  | 0.425158073  | 3.082423 | 0.002053 | Midgut_1 day |
| AAEL006704 | FREP18   | FREP      | 3143.42  | 1286.33 | 1.289074242  | 0.838199584  | 18.54863 | 8.37E-77 | Midgut_1 day |
| AAEL006691 | FREP21   | FREP      | 197.46   | 111.805 | 0.820575724  | 0.369701066  | 2.222341 | 0.02626  | Midgut_1 day |
| AAEL003294 | FREP3    | FREP      | 2.46422  | 12.2444 | -2.312919113 | -2.763793772 | -3.1942  | 0.001402 | Midgut_1 day |
| AAEL006699 | FREP34   | FREP      | 169.058  | 84.7983 | 0.99541104   | 0.544536382  | 2.938345 | 0.0033   | Midgut_1 day |
| AAEL011400 | FREP36   | FREP      | 0.154572 | 6.04485 | -5.28935563  | -5.740230288 | -2.78298 | 0.005386 | Midgut_1 day |
| AAEL011007 | FREP37   | FREP      | 73.8202  | 34.3819 | 1.102366374  | 0.651491715  | 2.280311 | 0.022589 | Midgut_1 day |
| AAEL004156 | FREP9    | FREP      | 606.46   | 252.965 | 1.261474705  | 0.810600046  | 7.912001 | 2.53E-15 | Midgut_1 day |
| AAEL009842 | GALE12   | GALE      | 459.574  | 223.576 | 1.039531852  | 0.588657194  | 5.197688 | 2.02E-07 | Midgut_1 day |
| AAEL012135 | GALE2    | GALE      | 225.778  | 76.6082 | 1.559334187  | 1.108459528  | 6.268753 | 3.64E-10 | Midgut_1 day |

|            |         |                 |           |          |               |               |           |           |              |
|------------|---------|-----------------|-----------|----------|---------------|---------------|-----------|-----------|--------------|
| AAEL003844 | GALE5   | GALE            | 641. 786  | 210. 874 | 1. 605711092  | 1. 154836433  | 10. 92406 | 8. 85E-28 | Midgut_1 day |
| AAEL005293 | GALE8A  | GALE            | 423. 935  | 161. 78  | 1. 389809814  | 0. 938935156  | 7. 493501 | 6. 71E-14 | Midgut_1 day |
| AAEL004522 | GAM1    | Gambicin        | 1085. 42  | 696. 837 | 0. 639360263  | 0. 188485605  | 2. 741901 | 0. 006108 | Midgut_1 day |
| AAEL009176 | GNBPB3  | GNBP            | 128. 26   | 55. 5693 | 1. 20671134   | 0. 755836682  | 3. 424711 | 0. 000615 | Midgut_1 day |
| AAEL009178 | GNBPB4  | GNBP            | 1285. 41  | 526. 139 | 1. 288712702  | 0. 837838044  | 11. 85166 | 2. 11E-32 | Midgut_1 day |
| AAEL012069 | GPXH1   | GPX             | 355. 3    | 139. 03  | 1. 353641466  | 0. 902766808  | 6. 637251 | 3. 2E-11  | Midgut_1 day |
| AAEL004401 | HPX7    | HPX             | 1. 95119  | 114. 061 | -5. 869307507 | -6. 320182165 | -12. 0377 | 2. 25E-33 | Midgut_1 day |
| AAEL004388 | HPX8A   | HPX             | 1. 76198  | 89. 3823 | -5. 664719715 | -6. 115594374 | -10. 6833 | 1. 22E-26 | Midgut_1 day |
| AAEL004390 | HPX8B   | HPX             | 7. 70715  | 342. 482 | -5. 473686886 | -5. 924561544 | -20. 941  | 2. 26E-97 | Midgut_1 day |
| AAEL004386 | HPX8C   | HPX             | 3. 91822  | 182. 362 | -5. 540462922 | -5. 991337581 | -15. 2751 | 1. 12E-52 | Midgut_1 day |
| AAEL009074 | IAP1    | IAP             | 376. 425  | 185. 28  | 1. 022655288  | 0. 57178063   | 4. 58247  | 4. 6E-06  | Midgut_1 day |
| AAEL006633 | IAP2    | IAP             | 15. 1446  | 21. 7545 | -0. 522510385 | -0. 973385043 | -2. 04499 | 0. 040856 | Midgut_1 day |
| AAEL014251 | IAP5    | IAP             | 4. 76864  | 21. 614  | -2. 180316311 | -2. 63119097  | -4. 13416 | 3. 56E-05 | Midgut_1 day |
| AAEL003723 | LYSC11  | LYSC            | 677. 037  | 273. 312 | 1. 308685875  | 0. 857811217  | 8. 77465  | 1. 71E-18 | Midgut_1 day |
| AAEL009531 | ML      | niemann-pick C1 | 360. 97   | 146. 528 | 1. 300702565  | 0. 849827907  | 6. 355751 | 2. 07E-10 | Midgut_1 day |
| AAEL004120 | ML1     | ML              | 3. 891    | 34. 7942 | -3. 160633951 | -3. 61150861  | -6. 07482 | 1. 24E-09 | Midgut_1 day |
| AAEL006854 | ML13    | ML              | 6. 35291  | 16. 8773 | -1. 409594637 | -1. 860469295 | -2. 95219 | 0. 003155 | Midgut_1 day |
| AAEL015138 | ML18    | ML              | 27. 9542  | 6. 77578 | 2. 04460612   | 1. 593731462  | 2. 915545 | 0. 003551 | Midgut_1 day |
| AAEL009760 | ML21    | ML              | 852. 833  | 441. 688 | 0. 949235627  | 0. 498360968  | 6. 089601 | 1. 13E-09 | Midgut_1 day |
| AAEL015136 | ML6     | ML              | 13474. 1  | 5842. 49 | 1. 205533647  | 0. 754658989  | 35. 16923 | 5. 9E-271 | Midgut_1 day |
| AAEL004823 | MnSOD1  | SOD-Mn-Fe       | 55. 5407  | 71. 4777 | -0. 363947852 | -0. 814822511 | -3. 18948 | 0. 001425 | Midgut_1 day |
| AAEL010171 | PGRPLB  | PGRP            | 472. 865  | 100. 586 | 2. 232998843  | 1. 782124185  | 12. 97904 | 1. 61E-38 | Midgut_1 day |
| AAEL011608 | PGRPLD  | PGRP            | 5. 57977  | 25. 3584 | -2. 184186161 | -2. 635060819 | -4. 48155 | 7. 41E-06 | Midgut_1 day |
| AAEL009474 | PGRPS1  | PGRP            | 1481. 35  | 527. 785 | 1. 488890294  | 1. 038015636  | 15. 22566 | 2. 39E-52 | Midgut_1 day |
| AAEL011763 | PPO3    | PPO             | 2. 50916  | 8. 08382 | -1. 687832729 | -2. 138707387 | -2. 23815 | 0. 025211 | Midgut_1 day |
| AAEL013492 | PPO5    | PPO             | 13. 081   | 49. 6011 | -1. 922899281 | -2. 373773939 | -5. 90782 | 3. 47E-09 | Midgut_1 day |
| AAEL007624 | REL2    | REL             | 43. 2877  | 18. 0231 | 1. 26410997   | 0. 813235312  | 2. 119435 | 0. 034054 | Midgut_1 day |
| AAEL009192 | SCRASP1 | SCRA            | 0. 745117 | 7. 76252 | -3. 380986197 | -3. 831860855 | -2. 93034 | 0. 003386 | Midgut_1 day |
| AAEL009420 | SCRBQ1  | SCRB            | 46. 6039  | 20. 6352 | 1. 175343269  | 0. 724468611  | 1. 989451 | 0. 046651 | Midgut_1 day |
| AAEL009423 | SCRBQ2  | SCRB            | 149. 129  | 59. 1912 | 1. 333106225  | 0. 882231566  | 4. 216998 | 2. 48E-05 | Midgut_1 day |
| AAEL009432 | SCRBQ3  | SCRB            | 461. 449  | 208. 451 | 1. 146462915  | 0. 695588256  | 6. 041365 | 1. 53E-09 | Midgut_1 day |
| AAEL000499 | SPZ1A   | SPZ             | 0. 585263 | 24. 9404 | -5. 413255718 | -5. 864130377 | -5. 65222 | 1. 58E-08 | Midgut_1 day |
| AAEL013433 | SPZ1C   | SPZ             | 0         | 5. 0641  | -3. 340305894 | -3. 791180552 | -2. 35827 | 0. 01836  | Midgut_1 day |
| AAEL007765 | SRPN10  | SRPN-INHIB      | 2580. 87  | 948. 826 | 1. 443642025  | 0. 992767367  | 19. 37712 | 1. 2E-83  | Midgut_1 day |
| AAEL003686 | SRPN11  | SRPN-nonINHIB   | 3. 34451  | 22. 7916 | -2. 768635443 | -3. 219510102 | -4. 69104 | 2. 72E-06 | Midgut_1 day |

|            |        |            |          |         |              |              |          |          |              |
|------------|--------|------------|----------|---------|--------------|--------------|----------|----------|--------------|
| AAEL014078 | SRPN2  | SRPN-INHIB | 0.551747 | 4.41461 | -3.000207206 | -3.451081864 | -2.12601 | 0.033503 | Midgut_1 day |
| AAEL002720 | SRPN20 | SRPN-INHIB | 1.9728   | 16.7124 | -3.082602318 | -3.533476976 | -4.17527 | 2.98E-05 | Midgut_1 day |
| AAEL005665 | SRPN3  | SRPN-INHIB | 2.57187  | 19.5905 | -2.929264593 | -3.380139252 | -4.44079 | 8.96E-06 | Midgut_1 day |
| AAEL013936 | SRPN4  | SRPN-INHIB | 4.54609  | 22.732  | -2.32202647  | -2.772901128 | -4.35969 | 0.000013 | Midgut_1 day |
| AAEL014141 | SRPN5  | SRPN-INHIB | 1.47714  | 9.86984 | -2.740220129 | -3.191094788 | -3.07485 | 0.002106 | Midgut_1 day |
| AAEL011777 | SRPN8  | SRPN-INHIB | 1.57357  | 7.46817 | -2.24671341  | -2.697588069 | -2.46293 | 0.013781 | Midgut_1 day |
| AAEL008364 | SRPN9  | SRPN-INHIB | 3.87512  | 39.1773 | -3.337705082 | -3.788579741 | -6.55782 | 5.46E-11 | Midgut_1 day |
| AAEL000087 | TEP22  | TEP        | 1.11661  | 9.34807 | -3.065543156 | -3.516417814 | -3.11679 | 0.001828 | Midgut_1 day |
| AAEL013441 | TOLL9A | TOLL       | 141.476  | 57.0731 | 1.309674503  | 0.858799844  | 4.014541 | 5.96E-05 | Midgut_1 day |
| AAEL011734 | TOLL9B | TOLL       | 159.882  | 73.1356 | 1.128361786  | 0.677487128  | 3.474173 | 0.000512 | Midgut_1 day |
| AAEL004112 | TPX2   | TPX        | 676.161  | 638.276 | 0.083186404  | -0.367688254 | -4.64838 | 3.35E-06 | Midgut_1 day |
| AAEL002309 | TPX4   | TPX        | 1149.41  | 375.587 | 1.613674472  | 1.162799814  | 14.70139 | 6.32E-49 | Midgut_1 day |

---
