# Supplementary material for: Aedes aegypti HPX8C modulates immune responses against viral infection
Source: PubMed Central journal article supplement (PMC6464178; doi:10.1371/journal.pntd.0007287), 2019-04-15
Supplement: pntd.0007287.s003.pdf [file pntd.0007287.s003.pdf]

**S3\_Table. Primers used for qPCR and synthesis of dsRNAs**

| Seq                      | Direction | GeneID     | GeneName  | Primer use |
|--------------------------|-----------|------------|-----------|------------|
| TCAGTGTACAAGAAGCTGACCGGA | Left      | AAEL00949  | RpS7      | qPCR       |
| TTCCGCGCGCTCACTTATTAGATT | Right     |            | RpS7      | qPCR       |
| CAGGCTATGGCACTGTCACGAT   | Left      | AF204178.1 | DENV-E    | qPCR       |
| CCATTTGCAGCAACACCATCTC   | Right     |            | DENV-E    | qPCR       |
| CTGTTCACTTTCGTCTTTCTGC   | left      | AAEL00338  | Attacin   | qPCR       |
| AGGAAGCCTCCATGTTCTCAT    | right     |            | Attacin   | qPCR       |
| TGGCTGTTCTTCTCCTGACC     | left      | AAEL00062  | CecropinA | qPCR       |
| CCCCAGCTACAACAGGAAGA     | right     |            | CecropinA | qPCR       |
| GCCAAAACCTGTTCTCTTG      | Left      | AAEL00452  | Gambicin  | qPCR       |
| CGATGTAGCATTCCGGTGATG    | Right     |            | Gambicin  | qPCR       |
| GTTACGCACAGTTTGACGC      | left      | AAEL00440  | HPX7      | qPCR       |
| TGTTCCAGGATTCCGCCTAC     | right     |            | HPX7      | qPCR       |
| GCTGCTTCCGTTGAGTCGTA     | left      | AAEL00438  | HPX8A     | qPCR       |
| CCCAGTGGAGGTTGATGTGA     | right     |            | HPX8A     | qPCR       |
| CCTCACTGACCCTCATTCCG     | left      | AAEL00439  | HPX8B     | qPCR       |
| GATGCCAGATCCGATCCAAA     | right     |            | HPX8B     | qPCR       |
| ACGGGTATGCTACGAAGGTG     | left      | AAEL00438  | HPX8C     | qPCR       |
| GCAAGATCGGCAAGAACTCA     | right     |            | HPX8C     | qPCR       |
| CAAATCGCATTTCGATCCTTC    | left      | AAEL0134   | CAT1      | qPCR       |
| GGGCCATCACGTTGATAGTT     | right     |            | CAT1      | qPCR       |
| ACACGGTCGTTTCATTGTTTCG   | left      | AAEL00627  | CuSOD2    | qPCR       |
| CACTGCATAGCTGCTCTGGTT    | right     |            | CuSOD2    | qPCR       |
| ATGGGCATGGCGTCACAG       | left      | AAEL00756  | DUOX      | qPCR       |
| TCGGGCAGTCCGTTGTCT       | right     |            | DUOX      | qPCR       |
| GATGCCGATGAACTGAAGCG     | left      | AAEL00663  | IAP2      | qPCR       |
| GTTCCCATGACCGATGACG      | right     |            | IAP2      | qPCR       |
| GAAGATGCATCGCAATCTGTA    | left      | AAEL01509  | PIAS      | qPCR       |
| GGAATGGTTGGCGTACTAGC     | right     |            | PIAS      | qPCR       |
| CAGCATCGTCGGCTTCATCC     | Left      | AAEL00969  | STAT      | qPCR       |
| TTGACCCAGGCGATTGTGAT     | Right     |            | STAT      | qPCR       |
| GCAGATGAAGTCCAAGGAGC     | Left      | AAEL0007   | Cactus    | qPCR       |
| GATCACGGCAAGGTGTAGGT     | Right     |            | Cactus    | qPCR       |
| GACAGCCACATTCCGACC       | Left      | AAEL00762  | Rel2      | qPCR       |

|                                       |       |           |           |                           |
|---------------------------------------|-------|-----------|-----------|---------------------------|
| CTCCAGCTTGGACTCCTCC                   | Right |           | Rel2      | qPCR                      |
| TTGGAAGACGCACTAAAGGAA                 | Left  | AAEL00357 | Caspar    | qPCR                      |
| CACCCGTACAGCACAAAGTG                  | Right |           | Caspar    | qPCR                      |
| GGCTGCAAAAAGGGAGTCTG                  | left  | AAEL00769 | Rel1      | qPCR                      |
| AGATCGATGGTGGCAGGCT                   | right |           | Rel1      | qPCR                      |
| ATACTTGCCGAAAGTGGTGG                  | left  | AAEL00440 | HPX7RNAi  | synthesis dsRNA from cDNA |
| CGCAAACCTGATCGCTAATGA                 | right |           | HPX7RNAi  | synthesis dsRNA from cDNA |
| TAATACGACTCACTATAGGGATACTTGCCGAAAGTGC | left  | AAEL00440 | HPX7RNAi  | synthesis dsRNA from cDNA |
| TAATACGACTCACTATAGGGCGCAAACCTGATCGCTA | right |           | HPX7RNAi  | synthesis dsRNA from cDNA |
| ATGGCACTCAAGCGAACTCT                  | left  | AAEL00438 | HPX8ARNAi | synthesis dsRNA from cDNA |
| GCCATGTCGCAGTAGTCTGA                  | right |           | HPX8ARNAi | synthesis dsRNA from cDNA |
| TAATACGACTCACTATAGGGATGGCACTCAAGCGAA  | left  | AAEL00438 | HPX8ARNAi | synthesis dsRNA from cDNA |
| TAATACGACTCACTATAGGGGCCATGTCGCAGTAGTC | right |           | HPX8ARNAi | synthesis dsRNA from cDNA |
| GTACAGCAATTGGGCTTGGT                  | left  | AAEL00439 | HPX8BRNAi | synthesis dsRNA from cDNA |
| TGTTTGCGCAGATTATAGCG                  | right |           | HPX8BRNAi | synthesis dsRNA from cDNA |
| TAATACGACTCACTATAGGGGTACAGCAATTGGGCTT | left  | AAEL00439 | HPX8BRNAi | synthesis dsRNA from cDNA |
| TAATACGACTCACTATAGGGTGTTTGCGCAGATTATA | right |           | HPX8BRNAi | synthesis dsRNA from cDNA |
| ACGGGTATGCTACGAAGGTG                  | left  | AAEL00438 | HPX8CRNAi | synthesis dsRNA from cDNA |
| GTATGGTCGAACGGCAAAGT                  | right |           | HPX8CRNAi | synthesis dsRNA from cDNA |
| TAATACGACTCACTATAGGGACGGGTATGCTACGAA  | left  | AAEL00438 | HPX8CRNAi | synthesis dsRNA from cDNA |
| TAATACGACTCACTATAGGGGTATGGTCGAACGGCA  | right |           | HPX8CRNAi | synthesis dsRNA from cDNA |
| TGAACGGTGCATTCAAAGAA                  | left  | AAEL00411 | TPX2RNAi  | synthesis dsRNA from cDNA |
| TATTCCTTCGACTTTTGCGG                  | right |           | TPX2RNAi  | synthesis dsRNA from cDNA |
| TAATACGACTCACTATAGGGTGAACGGTGCATTCAA  | left  | AAEL00411 | TPX2RNAi  | synthesis dsRNA from cDNA |
| TAATACGACTCACTATAGGGTATTCCTTCGACTTTTG | right |           | TPX2RNAi  | synthesis dsRNA from cDNA |
